# Supplementary material
Source: publisher figshare collection journal article supplement (https://gsajournals.figshare.com/ndownloader/files/23856842)
Supplement: Supplementary file 1 [file 23856842]

## Sheet: Data type & Source
Table S1 Expression data type and source for 442 samples
Cell	Expression data type	Tissue Type	Source
ESC.FES21__1_A	microarray	ESC	previously used in Zhixi Su et al. [31]
ESC.FES21__1_B	microarray	ESC
ESC.FES22__1_A	microarray	ESC
ESC.FES22__1_B	microarray	ESC
ESC.FES29__1_A	microarray	ESC
ESC.FES29__1_B	microarray	ESC
ESC.FES30__1_A	microarray	ESC
ESC.FES30__1_B	microarray	ESC
FIBROBLAST__1_A	microarray	other somatic
FIBROBLAST__1_B	microarray	other somatic
ESC.HS181__1_A	microarray	ESC
ESC.HS181__1_B	microarray	ESC
ESC.HS235__1_A	microarray	ESC
ESC.HS235__1_B	microarray	ESC
ESC.HS237__1_A	microarray	ESC
ESC.HS237__1_B	microarray	ESC
ESC.NONLINEAGEDIFF__1_A	microarray	ESC-derived
ADRENAL__2_A	microarray	other somatic
AMYGDALA__2_A	microarray	other somatic
BLADDER__2_A	microarray	other somatic
BONEMARROW__2_A	microarray	other somatic
BRAIN__2_A	microarray	other somatic
BREAST__2_A	microarray	other somatic
CAUDATE__2_A	microarray	other somatic
CEREBELLUM__2_A	microarray	other somatic
COLON__2_A	microarray	other somatic
CORPUS__2_A	microarray	other somatic
BRAIN.FETAL__2_A	microarray	other somatic
LIVER.FETAL__2_A	microarray	other somatic
FETALLUNG__2_A	microarray	other somatic
HEART__2_A	microarray	other somatic
HIPPOCAMPUS__2_A	microarray	other somatic
INTESTINE__2_A	microarray	other somatic
KIDNEY__2_A	microarray	other somatic
LIVER__2_A	microarray	other somatic
LUNG__2_A	microarray	other somatic
OVARY__2_A	microarray	female germ
PANCREAS__2_A	microarray	other somatic
PITUITARY__2_A	microarray	other somatic
PLACENTA__2_A	microarray	other somatic
PROSTATE__2_A	microarray	other somatic
SKELETAL.MUSCLE__2_A	microarray	other somatic
SALIVARY__2_A	microarray	other somatic
SKIN__2_A	microarray	other somatic
SPINALCORD__2_A	microarray	other somatic
SPLEEN__2_A	microarray	other somatic
STOMACH__2_A	microarray	other somatic
TESTIS__2_A	microarray	male germ
THALAMUS__2_A	microarray	other somatic
THYMUS__2_A	microarray	other somatic
THYROID__2_A	microarray	other somatic
TRACHEA__2_A	microarray	other somatic
UTERUS__2_A	microarray	other somatic
LUNG__3_B	microarray	other somatic
HEART__3_A	microarray	other somatic
PROSTATE__3_A	microarray	other somatic
UTERUS__3_A	microarray	other somatic
LIVER__3_B	microarray	other somatic
LEUKEMIA.PROMYELOCYTIC.HL.60__3_A	microarray	other somatic
LEUKEMIA.CHRONIC.MYELOGENOUS.K.562__3_A	microarray	other somatic
SPINALCORD__3_A	microarray	other somatic
BRAIN.FETAL__3_A	microarray	other somatic
LYMPH.NODE__3_A	microarray	other somatic
LEUKEMIA.LYMPHOBLASTIC.MOLT.4__3_A	microarray	other somatic
LEUKEMIA.PROMYELOCYTIC.HL.60__3_B	microarray	other somatic
LEUKEMIA.CHRONIC.MYELOGENOUS.K.562__3_B	microarray	other somatic
SPINALCORD__3_B	microarray	other somatic
BRAIN.CAUDATE.NUCLEUS__3_A	microarray	other somatic
BRAIN.FETAL__3_B	microarray	other somatic
LYMPH.NODE__3_B	microarray	other somatic
LIVER.FETAL__3_A	microarray	other somatic
TESTIS__3_A	microarray	male germ
TRACHEA__3_A	microarray	other somatic
KIDNEY__3_A	microarray	other somatic
ADRENAL.GLAND__3_A	microarray	other somatic
BRAIN.CEREBELLUM__3_A	microarray	other somatic
LIVER.FETAL__3_B	microarray	other somatic
TESTIS__3_B	microarray	male germ
TRACHEA__3_B	microarray	other somatic
THYMUS__3_A	microarray	other somatic
KIDNEY__3_B	microarray	other somatic
ADRENAL.GLAND__3_B	microarray	other somatic
BRAIN.CEREBELLUM__3_B	microarray	other somatic
BONE.MARROW__3_A	microarray	other somatic
PITUITARY__3_A	microarray	other somatic
LEUKEMIA.LYMPHOBLASTIC.MOLT.4__3_B	microarray	other somatic
BRAIN.CAUDATE.NUCLEUS__3_B	microarray	other somatic
LUNG.FETAL__3_A	microarray	other somatic
BONE.MARROW__3_B	microarray	other somatic
PITUITARY__3_B	microarray	other somatic
LYMPHOMA.BURKITTS.DAUDI__3_A	microarray	other somatic
LYMPHOMA.BURKITTS.DAUDI__3_B	microarray	other somatic
LUNG.FETAL__3_B	microarray	other somatic
BRAIN.THALAMUS__3_A	microarray	other somatic
BRAIN.WHOLE__3_A	microarray	other somatic
THYMUS__3_B	microarray	other somatic
BRAIN.THALAMUS__3_B	microarray	other somatic
SALIVARYGLAND__3_A	microarray	other somatic
SALIVARYGLAND__3_B	microarray	other somatic
ADRENAL.CORTEX__3_A	microarray	other somatic
OVARY__3_A	microarray	female germ
ADRENAL.CORTEX__3_B	microarray	other somatic
BRAIN.CEREBELLUM.PEDUNCLES__3_A	microarray	other somatic
BRAIN.PARIETAL.LOBE__3_A	microarray	other somatic
BRAIN.PARIETAL.LOBE__3_B	microarray	other somatic
TESTIS.GERMCELL__3_A	microarray	male germ
TESTIS.INTERSTITIAL__3_A	microarray	male germ
TESTIS.LEYDIG.CELL__3_A	microarray	male germ
TESTIS.SEMINIFEROUS.TUBULE__3_A	microarray	male germ
TONSIL__3_A	microarray	other somatic
TESTIS.GERMCELL__3_B	microarray	male germ
TESTIS.LEYDIG.CELL__3_B	microarray	male germ
TESTIS.SEMINIFEROUS.TUBULE__3_B	microarray	male germ
TONSIL__3_B	microarray	other somatic
THYROID.FETAL__3_A	microarray	other somatic
OVARY__3_B	microarray	female germ
TESTIS.INTERSTITIAL__3_B	microarray	male germ
BRAIN.OCCIPITAL.LOBE__3_B	microarray	other somatic
PANCREAS.ISLET.CELL__3_A	microarray	other somatic
ADIPOCYTE.CULTURED__3_B	microarray	other somatic
BLOOD.WHOLE__3_A	microarray	other somatic
BLOOD.WHOLE__3_B	microarray	other somatic
THYROID.FETAL__3_B	microarray	other somatic
HBEC__3_A	microarray	other somatic
HBEC__3_B	microarray	other somatic
SMOOTH.MUSCLE__3_A	microarray	other somatic
CARDIAC.MYOCYTES__3_A	microarray	other somatic
BRAIN.PREFRONTAL.CORTEX__3_A	microarray	other somatic
BRAIN.PREFRONTAL.CORTEX__3_B	microarray	other somatic
PANCREAS__3_B	microarray	other somatic
BRAIN.CINGULATE.CORTEX__3_A	microarray	other somatic
PANCREAS.ISLET.CELL__3_B	microarray	other somatic
PANCREAS__3_A	microarray	other somatic
BRAIN.HYPOTHALAMUS__3_A	microarray	other somatic
BRAIN.CINGULATE.CORTEX__3_B	microarray	other somatic
BRAIN.OLFACTORY.BULB__3_A	microarray	other somatic
SMOOTH.MUSCLE__3_B	microarray	other somatic
CARDIAC.MYOCYTES__3_B	microarray	other somatic
BRAIN.CEREBELLUM.PEDUNCLES__3_B	microarray	other somatic
BRAIN.HYPOTHALAMUS__3_B	microarray	other somatic
BRAIN.OCCIPITAL.LOBE__3_A	microarray	other somatic
BRAIN.OLFACTORY.BULB__3_B	microarray	other somatic
ADIPOCYTE.CULTURED__3_A	microarray	other somatic
BRAIN.SUPERIOR.CERVICAL.GANGLION__3_A	microarray	other somatic
BRAIN.SUPERIOR.CERVICAL.GANGLION__3_B	microarray	other somatic
BRAIN.MEDULLA.OBLONGATA__3_A	microarray	other somatic
BRAIN.MEDULLA.OBLONGATA__3_B	microarray	other somatic
BRAIN.PONS__3_A	microarray	other somatic
BRAIN.PONS__3_B	microarray	other somatic
APPENDIX__3_A	microarray	other somatic
APPENDIX__3_B	microarray	other somatic
TRIGEMINAL.GANGLION__3_A	microarray	other somatic
TRIGEMINAL.GANGLION__3_B	microarray	other somatic
BRAIN.TEMPORAL.LOBE__3_A	microarray	other somatic
BRAIN.TEMPORAL.LOBE__3_B	microarray	other somatic
TONGUE__3_A	microarray	other somatic
TONGUE__3_B	microarray	other somatic
UTERUS.CORPUS__3_A	microarray	other somatic
UTERUS.CORPUS__3_B	microarray	other somatic
SKELETAL.MUSCLE.PSOAS__3_A	microarray	other somatic
SKELETAL.MUSCLE.PSOAS__3_B	microarray	other somatic
COLORECTAL.ADENOCARCINOMA__3_A	microarray	other somatic
THYROID__3_B	microarray	other somatic
BRAIN.AMYGDALA__3_B	microarray	other somatic
LYMPHOMA.RAJI__3_A	microarray	other somatic
THYROID__3_A	microarray	other somatic
BRAIN.AMYGDALA__3_A	microarray	other somatic
COLORECTAL.ADENOCARCINOMA__3_B	microarray	other somatic
LYMPHOMA.RAJI__3_B	microarray	other somatic
BRAIN.WHOLE__3_B	microarray	other somatic
HEART__3_B	microarray	other somatic
UTERUS__3_B	microarray	other somatic
PROSTATE__3_B	microarray	other somatic
LUNG__3_A	microarray	other somatic
LIVER__3_A	microarray	other somatic
BM.CD34__3_A	microarray	other somatic
PB.BDCA4.DENTRITICCELLS__3_A	microarray	other somatic
BM.CD34__3_B	microarray	other somatic
BM.CD105.ENDOTHELIAL__3_A	microarray	other somatic
BM.CD105.ENDOTHELIAL__3_B	microarray	other somatic
BM.CD33.MYELOID__3_A	microarray	other somatic
BM.CD33.MYELOID__3_B	microarray	other somatic
PB.CD19.B.CELLS__3_A	microarray	other somatic
PB.CD19.B.CELLS__3_B	microarray	other somatic
PB.CD56.NK.CELLS__3_A	microarray	other somatic
PB.CD56.NK.CELLS__3_B	microarray	other somatic
PB.BDCA4.DENTRITICCELLS__3_B	microarray	other somatic
PB.CD14.MONOCYTES__3_A	microarray	other somatic
PB.CD14.MONOCYTES__3_B	microarray	other somatic
BM.CD71.EARLYERYTHROID__3_A	microarray	other somatic
BM.CD71.EARLYERYTHROID__3_B	microarray	other somatic
PB.CD4.T.CELLS__3_A	microarray	other somatic
PB.CD4.T.CELLS__3_B	microarray	other somatic
PB.CD8.T.CELLS__3_A	microarray	other somatic
PB.CD8.T.CELLS__3_B	microarray	other somatic
B.LYMPHOBLASTS.721__3_A	microarray	other somatic
B.LYMPHOBLASTS.721__3_B	microarray	other somatic
PLACENTA__3_A	microarray	other somatic
PLACENTA__3_B	microarray	other somatic
DRG__3_A	microarray	other somatic
DRG__3_B	microarray	other somatic
ATRIOVENTRICULAR.NODE__3_A	microarray	other somatic
ATRIOVENTRICULAR.NODE__3_B	microarray	other somatic
CILIARY.GANGLION__3_A	microarray	other somatic
CILIARY.GANGLION__3_B	microarray	other somatic
BRAIN.GLOBUS_PALLIDUS__3_A	microarray	other somatic
BRAIN.GLOBUS_PALLIDUS__3_B	microarray	other somatic
SKIN__3_A	microarray	other somatic
SKIN__3_B	microarray	other somatic
BRAIN.SUBTHALAMIC_NUCLEUS__3_A	microarray	other somatic
BRAIN.SUBTHALAMIC_NUCLEUS__3_B	microarray	other somatic
ESC.DIFFERENTIATED.NON.LINEAGE__4_A	microarray	ESC-derived
ESC.DIFFERENTIATED.NON.LINEAGE__4_B	microarray	ESC-derived
ESC.DIFFERENTIATED.NON.LINEAGE__4_C	microarray	ESC-derived
ESC.H1__4_A	microarray	ESC
ESC.H1__4_B	microarray	ESC
ESC.H1__4_C	microarray	ESC
GCT.MIXED.EMBRYONAL.CARCINOMA.SEMINOMA__5_J	microarray	male GCT
GCT.MIXED.EMBRYONAL.CARCINOMA.TERATOMA__5_K	microarray	male GCT
GCT.MIXED.EMBRYONAL.CARCINOMA.TERATOMA__5_L	microarray	male GCT
GCT.MIXED.EMBRYONAL.CARCINOMA.TERATOMA.TERATOMA.WITH.SECONDARY.SOMATIC.MALIGNANCY__5_A	microarray	male GCT
GCT.PURE.SEMINOMA__5_L	microarray	male GCT
GCT.MIXED.EMBRYONAL.CARCINOMA.TERATOMA__5_M	microarray	male GCT
GCT.PURE.TERATOMA__5_P	microarray	male GCT
GCT.PURE.YOLK.SAC.TUMOR__5_K	microarray	male GCT
GCT.PURE.YOLK.SAC.TUMOR__5_L	microarray	male GCT
GCT.PURE.ANAPLASTIC.SEMINOMA__5_B	microarray	male GCT
GCT.PURE.SEMINOMA__5_N	microarray	male GCT
GCT.PURE.SEMINOMA__5_O	microarray	male GCT
GCT.MIXED.SEMINOMA.SYNCYTIOTROPHOBLASTS.TERATOMA.YOLK.SAC.TUMOR__5_A	microarray	male GCT
GCT.MIXED.CHORIOCARCINOMA.EMBRYONAL.CARCINOMA__5_B	microarray	male GCT
GCT.MIXED.EMBRYONAL.CARCINOMA.SYNCYTIOTROPHOBLASTS.TERATOMA.YOLK.SAC.TUMOR__5_C	microarray	male GCT
GCT.PURE.TERATOMA__5_Q	microarray	male GCT
GCT.MIXED.EMBRYONAL.CARCINOMA.TERATOMA.YOLK.SAC.TUMOR__5_B	microarray	male GCT
GCT.MIXED.EMBRYONAL.CARCINOMA.YOLK.SAC.TUMOR__5_F	microarray	male GCT
GCT.MIXED.EMBRYONAL.CARCINOMA.YOLK.SAC.TUMOR__5_G	microarray	male GCT
GCT.MIXED.EMBRYONAL.CARCINOMA.YOLK.SAC.TUMOR__5_H	microarray	male GCT
GCT.PURE.TERATOMA__5_R	microarray	male GCT
GCT.PURE.TERATOMA__5_S	microarray	male GCT
GCT.PURE.YOLK.SAC.TUMOR__5_M	microarray	male GCT
GCT.MIXED.EMBRYONAL.CARCINOMA.YOLK.SAC.TUMOR__5_I	microarray	male GCT
GCT.MIXED.CHORIOCARCINOMA.EMBRYONAL.CARCINOMA.YOLK.SAC.TUMOR__5_C	microarray	male GCT
GCT.PURE.TERATOMA__5_T	microarray	male GCT
GCT.PURE.TERATOMA__5_U	microarray	male GCT
GCT.PURE.TERATOMA.WITH.SECONDARY.SOMATIC.MALIGNANCY__5_B	microarray	male GCT
GCT.PURE.EMBRYONAL.CARCINOMA__5_P	microarray	male GCT
GCT.MIXED.EMBRYONAL.CARCINOMA.SEMINOMA.TERATOMA__5_B	microarray	male GCT
GCT.MIXED.TERATOMA.WITH.SECONDARY.SOMATIC.MALIGNANCY.YOLK.SAC__5_B	microarray	male GCT
GCT.MIXED.EMBRYONAL.CARCINOMA.TERATOMA__5_D	microarray	male GCT
GCT.PURE.CHORIOCARCINOMA__5_D	microarray	male GCT
GCT.PURE.EMBRYONAL.CARCINOMA__5_Q	microarray	male GCT
GCT.MIXED.EMBRYONAL.CARCINOMA.TERATOMA__5_E	microarray	male GCT
GCT.MIXED.SEMINOMA.TERATOMA.YOLK.SAC__5_B	microarray	male GCT
GCT.PURE.YOLK.SAC.TUMOR__5_N	microarray	male GCT
GCT.PURE.YOLK.SAC.TUMOR__5_O	microarray	male GCT
GCT.MIXED.EMBRYONAL.CARCINOMA.TERATOMA.YOLK.SAC__5_B	microarray	male GCT
GCT.PURE.YOLK.SAC.TUMOR__5_Q	microarray	male GCT
GCT.MIXED.EMBRYONAL.CARCINOMA.YOLK.SAC.TUMOR__5_J	microarray	male GCT
GCT.MIXED.TERATOMA.YOLK.SAC__5_A	microarray	male GCT
GCT.MIXED.EMBRYONAL.CARCINOMA.SEMINOMA.YOLK.SAC.TUMOR__5_B	microarray	male GCT
GCT.PURE.TERATOMA__5_V	microarray	male GCT
GCT.MIXED.TERATOMA.TERATOMA.WITH.SECONDARY.SOMATIC.MALIGNANCY__5_A	microarray	male GCT
GCT.PURE.SEMINOMA__5_M	microarray	male GCT
GCT.PURE.EMBRYONAL.CARCINOMA__5_R	microarray	male GCT
GCT.MIXED.SYNCYTIOTROPHOBLASTS.YOLK.SAC.TUMOR__5_B	microarray	male GCT
GCT.MIXED.EMBRYONAL.CARCINOMA.YOLK.SAC__5_B	microarray	male GCT
GCT.PURE.TERATOMA__5_X	microarray	male GCT
GCT.MIXED.CHORIOCARCINOMA.EMBRYONAL.CARCINOMA.TERATOMA__5_B	microarray	male GCT
GCT.MIXED.EMBRYONAL.CARCINOMA.TERATOMA__5_F	microarray	male GCT
GCT.PURE.EMBRYONAL.CARCINOMA__5_S	microarray	male GCT
GCT.PURE.YOLK.SAC.TUMOR__5_P	microarray	male GCT
GCT.PURE.TERATOMA__5_W	microarray	male GCT
GCT.PURE.EMBRYONAL.CARCINOMA__5_T	microarray	male GCT
GCT.MIXED.EMBRYONAL.CARCINOMA.TERATOMA.YOLK.SAC.TUMOR__5_F	microarray	male GCT
GCT.PURE.EMBRYONAL.CARCINOMA__5_U	microarray	male GCT
GCT.PURE.SEMINOMA__5_P	microarray	male GCT
GCT.PURE.SEMINOMA__5_Q	microarray	male GCT
GCT.PURE.SEMINOMA__5_R	microarray	male GCT
GCT.MIXED.EMBRYONAL.CARCINOMA.SEMINOMA__5_A	microarray	male GCT
GCT.PURE.SEMINOMA__5_S	microarray	male GCT
GCT.PURE.SEMINOMA__5_T	microarray	male GCT
GCT.MIXED.TERATOMA.YOLK.SAC.TUMOR__5_F	microarray	male GCT
GCT.PURE.EMBRYONAL.CARCINOMA__5_V	microarray	male GCT
GCT.MIXED.CHORIOCARCINOMA.EMBRYONAL.CARCINOMA.YOLK.SAC.TUMOR__5_D	microarray	male GCT
GCT.MIXED.EMBRYONAL.CARCINOMA.TERATOMA.YOLK.SAC.TUMOR__5_C	microarray	male GCT
GCT.PURE.EMBRYONAL.CARCINOMA__5_W	microarray	male GCT
GCT.PURE.EMBRYONAL.CARCINOMA__5_X	microarray	male GCT
GCT.MIXED.EMBRYONAL.CARCINOMA.TERATOMA.YOLK.SAC__5_C	microarray	male GCT
GCT.MIXED.SEMINOMA.SYNCYTIOTROPHOBLASTS__5_A	microarray	male GCT
GCT.MIXED.TERATOMA.YOLK.SAC__5_B	microarray	male GCT
GCT.PURE.SEMINOMA__5_V	microarray	male GCT
GCT.MIXED.EMBRYONAL.CARCINOMA.SYNCYTIOTROPHOBLASTS.TERATOMA.YOLK.SAC.TUMOR__5_D	microarray	male GCT
GCT.PURE.YOLK.SAC.TUMOR__5_R	microarray	male GCT
GCT.PURE.TERATOMA__5_Y	microarray	male GCT
GCT.MIXED.TERATOMA.YOLK.SAC.TUMOR__5_G	microarray	male GCT
GCT.MIXED.TERATOMA.YOLK.SAC.TUMOR__5_H	microarray	male GCT
GCT.PURE.SEMINOMA__5_X	microarray	male GCT
GCT.PURE.YOLK.SAC.TUMOR__5_S	microarray	male GCT
GCT.MIXED.NON.SEMINOMATOUS__5_B	microarray	male GCT
GCT.MIXED.TERATOMA.TERATOMA.WITH.SECONDARY.SOMATIC.MALIGNANCY__5_B	microarray	male GCT
GCT.PURE.YOLK.SAC.TUMOR__5_T	microarray	male GCT
GCT.PURE.TERATOMA__5_Z	microarray	male GCT
GCT.PURE.EMBRYONAL.CARCINOMA__5_Y	microarray	male GCT
GCT.PURE.EMBRYONAL.CARCINOMA__5_Z	microarray	male GCT
GCT.MIXED.EMBRYONAL.CARCINOMA.SEMINOMA__5_B	microarray	male GCT
GCT.PURE.EMBRYONAL.CARCINOMA__5_AA	microarray	male GCT
GCT.MIXED.EMBRYONAL.CARCINOMA.SEMINOMA__5_C	microarray	male GCT
GCT.MIXED.EMBRYONAL.CARCINOMA.SEMINOMA__5_D	microarray	male GCT
GCT.PURE.SEMINOMA__5_U	microarray	male GCT
GCT.MIXED.TERATOMA.YOLK.SAC.TUMOR__5_B	microarray	male GCT
GCT.PURE.TERATOMA__5_AA	microarray	male GCT
GCT.PURE.TERATOMA__5_AB	microarray	male GCT
GCT.PURE.EMBRYONAL.CARCINOMA__5_AB	microarray	male GCT
GCT.PURE.TERATOMA__5_AC	microarray	male GCT
GCT.PURE.TERATOMA__5_AD	microarray	male GCT
GCT.PURE.CHORIOCARCINOMA__5_C	microarray	male GCT
GCT.PURE.EMBRYONAL.CARCINOMA__5_AC	microarray	male GCT
GCT.PURE.EMBRYONAL.CARCINOMA__5_AD	microarray	male GCT
TESTIS__5_G	microarray	male germ
TESTIS__5_H	microarray	male germ
TESTIS__5_I	microarray	male germ
TESTIS__5_J	microarray	male germ
TESTIS__5_K	microarray	male germ
TESTIS__5_L	microarray	male germ
ESC.I6__6_A	microarray	ESC
ESC.I6__6_B	microarray	ESC
ESC.I6__6_C	microarray	ESC
ESC.I6__6_D	microarray	ESC
ESC.I6__6_E	microarray	ESC
ESC.I6__6_F	microarray	ESC
HELA__6_A	microarray	other somatic
HELA__6_B	microarray	other somatic
HELA__6_C	microarray	other somatic
MESENCHYMAL.STEM.CELL.BM.DERIVED__7_A	microarray	other somatic
MESENCHYMAL.PRECURSOR.ESC.DERIVED__7_A	microarray	ESC-derived
ESC.H1__7_A	microarray	ESC
ESC.H1__7_B	microarray	ESC
ESC.H1__7_C	microarray	ESC
MESENCHYMAL.PRECURSOR.ESC.DERIVED__7_B	microarray	ESC-derived
GCT.DYSGERMINOMA__12_A	microarray	male GCT
GCT.DYSGERMINOMA__12_B	microarray	male GCT
GCT.DYSGERMINOMA__12_C	microarray	male GCT
GCT.SEMINOMA__12_A	microarray	male GCT
GCT.SEMINOMA__12_B	microarray	male GCT
GCT.SEMINOMA__12_C	microarray	male GCT
GCT.SEMINOMA__12_D	microarray	male GCT
GCT.SPERMATOCYTIC.SEMINOMA__12_A	microarray	male GCT
GCT.SPERMATOCYTIC.SEMINOMA__12_B	microarray	male GCT
GCT.SPERMATOCYTIC.SEMINOMA__12_C	microarray	male GCT
GCT.SPERMATOCYTIC.SEMINOMA__12_D	microarray	male GCT
GCT.SPERMATOCYTIC.SEMINOMA__12_E	microarray	male GCT
CHONDROCYTE__9_A	microarray	other somatic
CHONDROCYTE__9_B	microarray	other somatic
TESTIS.SEMINIFEROUS.TUBULE__9_A	microarray	male germ
TESTIS.SEMINIFEROUS.TUBULE__9_B	microarray	male germ
TESTIS.SPERMATID__9_A	microarray	male germ
TESTIS.SPERMATID__9_B	microarray	male germ
TESTIS.SPERMATOCYTE__9_A	microarray	male germ
TESTIS.SPERMATOCYTE__9_B	microarray	male germ
TESTIS__9_A	microarray	male germ
TESTIS__9_B	microarray	male germ
VASCULAR.SMOOTH.MUSCLE__9_A	microarray	other somatic
VASCULAR.SMOOTH.MUSCLE__9_B	microarray	other somatic
OOCYTE__10_A	microarray	female germ
OOCYTE__10_B	microarray	female germ
OOCYTE__10_C	microarray	female germ
SOMATIC.REF__10_A	microarray	other somatic
SOMATIC.REF__10_B	microarray	other somatic
SOMATIC.REF__10_C	microarray	other somatic
FETAL.OVARY.9.1WK__11_A	microarray	female germ
FETAL.OVARY.9.6WK__11_A	microarray	female germ
FETAL.OVARY.9.6WK__11_B	microarray	female germ
FETAL.OVARY.9.6WK__11_C	microarray	female germ
FETAL.OVARY.11WK__11_A	microarray	female germ
FETAL.OVARY.12WK__11_A	microarray	female germ
FETAL.OVARY.12.9WK__11_A	microarray	female germ
FETAL.OVARY.13.6WK__11_A	microarray	female germ
FETAL.OVARY.13.6WK__11_B	microarray	female germ
FETAL.OVARY.13.9WK__11_A	microarray	female germ
FETAL.OVARY.14.4WK__11_A	microarray	female germ
FETAL.OVARY.16.1WK__11_A	microarray	female germ
FETAL.OVARY.16.4WK__11_A	microarray	female germ
FETAL.OVARY.16.9WK__11_A	microarray	female germ
FETAL.OVARY.16.9WK__11_B	microarray	female germ
FETAL.OVARY.17.1WK__11_A	microarray	female germ
FETAL.OVARY.18.1WK__11_A	microarray	female germ
FETAL.TESTIS.9WK__11_A	microarray	male germ
FETAL.TESTIS.9.1WK__11_A	microarray	male germ
FETAL.TESTIS.9.9WK__11_A	microarray	male germ
FETAL.TESTIS.11WK__11_A	microarray	male germ
FETAL.TESTIS.11WK__11_B	microarray	male germ
FETAL.TESTIS.11.7WK__11_A	microarray	male germ
FETAL.TESTIS.12WK__11_A	microarray	male germ
FETAL.TESTIS.12.6WK__11_A	microarray	male germ
FETAL.TESTIS.13.6WK__11_A	microarray	male germ
FETAL.TESTIS.13.9WK__11_A	microarray	male germ
FETAL.TESTIS.13.9WK__11_B	microarray	male germ
FETAL.TESTIS.16.1WK__11_A	microarray	male germ
FETAL.TESTIS.16.1WK__11_B	microarray	male germ
FETAL.TESTIS.17.2WK__11_A	microarray	male germ
FETAL.TESTIS.18.6WK__11_A	microarray	male germ
FETAL.TESTIS.18.9WK__11_A	microarray	male germ
FETAL.TESTIS.19.9WK__11_A	microarray	male germ
TESTIS.SPERMATOGONIA__8_A	microarray	male germ
TESTIS.SOMATIC.CELL__8_A	microarray	male germ
TESTIS.SPERMATOGONIA__8_B	microarray	male germ
TESTIS.SOMATIC.CELL__8_B	microarray	male germ
TESTIS.SPERMATOGONIA__8_C	microarray	male germ
TESTIS.SOMATIC.CELL__8_C	microarray	male germ
pgc_F_4W.txt	RNA-seq	primordial germ	Jie Qiao et al.[14]
pgc_F_8W.txt	RNA-seq	primordial germ
pgc_F_8W_2.txt	RNA-seq	primordial germ
pgc_F_10W_2.txt	RNA-seq	primordial germ
pgc_F_11W_3.txt	RNA-seq	primordial germ
pgc_F_17W.txt	RNA-seq	primordial germ
pgc_M_4W.txt	RNA-seq	primordial germ
pgc_M_7W.txt	RNA-seq	primordial germ
pgc_M_7W_2.txt	RNA-seq	primordial germ
pgc_M_7W_3.txt	RNA-seq	primordial germ
pgc_M_10W.txt	RNA-seq	primordial germ
pgc_M_11W.txt	RNA-seq	primordial germ
pgc_M_11W_2.txt	RNA-seq	primordial germ
pgc_M_19W.txt	RNA-seq	primordial germ
pgc_M_19W_2.txt	RNA-seq	primordial germ
soma_F_4W.txt	RNA-seq	ESC
soma_F_8W.txt	RNA-seq	ESC
soma_F_10W.txt	RNA-seq	ESC
soma_F_11W.txt	RNA-seq	ESC
soma_F_17W.txt	RNA-seq	ESC
soma_M_7W.txt	RNA-seq	ESC
some_M_7W_2.txt	RNA-seq	ESC
soma_M_10W.txt	RNA-seq	ESC
soma_M_11W.txt	RNA-seq	ESC
soma_M_19W.txt	RNA-seq	ESC
Ad	RNA-seq	male germ	Jingtao Guo et al.[43]
Ap	RNA-seq	male germ
L/Z	RNA-seq	male germ
eP	RNA-seq	male germ
lP	RNA-seq	male germ
rspt	RNA-seq	male germ
SSC	RNA-seq	male germ	GSE92276[44]
Spermatogonia	RNA-seq	male germ

## Sheet: CpG OE&expression data
GENE.ID	CpG O/E	ESC.FES21__1_A	ESC.FES21__1_B	ESC.FES22__1_A	ESC.FES22__1_B	ESC.FES29__1_A	ESC.FES29__1_B	ESC.FES30__1_A	ESC.FES30__1_B	FIBROBLAST__1_A	FIBROBLAST__1_B	ESC.HS181__1_A	ESC.HS181__1_B	ESC.HS235__1_A	ESC.HS235__1_B	ESC.HS237__1_A	ESC.HS237__1_B	ESC.NONLINEAGEDIFF__1_A	ADRENAL__2_A	AMYGDALA__2_A	BLADDER__2_A	BONEMARROW__2_A	BRAIN__2_A	BREAST__2_A	CAUDATE__2_A	CEREBELLUM__2_A	COLON__2_A	CORPUS__2_A	BRAIN.FETAL__2_A	LIVER.FETAL__2_A	FETALLUNG__2_A	HEART__2_A	HIPPOCAMPUS__2_A	INTESTINE__2_A	KIDNEY__2_A	LIVER__2_A	LUNG__2_A	OVARY__2_A	PANCREAS__2_A	PITUITARY__2_A	PLACENTA__2_A	PROSTATE__2_A	SKELETAL.MUSCLE__2_A	SALIVARY__2_A	SKIN__2_A	SPINALCORD__2_A	SPLEEN__2_A	STOMACH__2_A	TESTIS__2_A
ENSG00000000003	0.577794	10.7468	9.92396	10.0265	10.356	10.449	10.5713	10.3322	9.93109	9.14731	9.08681	10.5012	10.4259	10.4809	10.7177	9.72392	9.30293	10.158	7.83741	7.21978	8.27776	6.14488	6.42988	8.80285	7.13574	6.37874	9.69254	8.07633	7.8751	9.47227	8.52925	6.82632	7.45039	7.18913	8.14239	9.48118	7.68278	8.85037	7.16459	9.21204	8.94723	8.05005	6.37387	9.84983	8.00032	7.97887	7.18853	8.2909	8.8103
ENSG00000000419	0.914306	10.0506	9.84784	9.6905	9.73265	10.1419	10.1682	9.84814	9.97034	9.92861	9.57966	9.94842	10.2089	10.0875	9.94533	9.81814	9.9887	9.43663	7.80284	7.83091	8.22816	7.34144	7.36281	8.11127	7.39644	7.02015	7.94318	7.82164	6.53169	7.94042	7.06269	7.93766	7.90219	7.40653	7.79668	7.81128	8.49145	8.15332	8.21178	8.18524	9.08444	8.61438	8.08494	7.46009	8.59512	7.40914	8.137	8.45948	8.6989
ENSG00000000460	0.605993	5.54349	4.85441	5.11985	4.94929	5.14532	5.14002	5.55477	4.9864	4.65723	4.58044	5.11313	5.03209	4.84942	4.94348	5.06207	5.14585	4.93025	4.50901	4.54136	4.72395	4.8403	4.41615	4.73958	4.3874	4.45578	4.8008	4.72932	4.62611	5.10337	4.69661	4.53709	4.71536	4.53916	4.43357	4.95786	4.655	4.62171	4.64642	4.7292	4.87962	4.6236	4.74056	4.76348	4.74377	4.66311	4.72256	4.66996	6.03883
ENSG00000000938	0.417993	5.68737	5.93202	5.94224	5.81916	5.69697	6.11081	5.80881	6.22772	5.72114	5.92474	5.51368	5.83664	6.02498	5.81951	5.84108	6.02296	6.48558	7.11014	7.0614	7.69059	9.62673	7.02537	7.46441	7.11533	7.19571	7.31603	6.95542	7.15242	7.06092	7.40939	7.29028	6.74913	7.40319	7.15601	7.43221	8.30039	7.15284	7.5758	6.85773	7.52202	7.49972	7.04533	7.36448	7.38982	7.47608	9.51207	7.43743	6.81446
ENSG00000001084	0.871698	7.5021	7.21745	7.40672	7.26685	7.83056	7.81861	7.69803	7.1249	6.45201	6.25264	7.77236	7.69183	7.41198	7.73384	7.02398	7.84086	6.44256	6.83306	7.59859	7.82075	7.77526	7.25517	7.01645	7.70926	6.38355	7.7832	8.18408	6.4815	8.83009	6.40762	6.6825	7.51789	7.37154	7.37731	8.41476	6.40476	6.72634	6.51436	6.90903	6.78414	7.45345	7.28764	6.5954	7.47047	7.36668	9.42132	7.53017	6.83579
ENSG00000001167	0.788225	6.26386	6.31217	6.20127	6.19671	6.11076	6.1455	6.1995	6.14723	6.25181	6.16744	6.25535	6.28257	6.56478	6.71061	6.17447	6.61021	6.30949	6.41597	6.14374	6.16978	6.50551	6.07842	6.49929	6.12651	5.89266	6.20293	6.13037	6.49058	6.34945	6.4666	6.18276	5.93828	6.22937	6.34452	6.39878	6.29169	6.46206	6.35366	5.91917	6.43619	6.16613	6.3127	6.4016	6.36948	6.11067	6.42282	6.09174	7.33828
ENSG00000001461	0.589031	5.30475	5.73566	5.44727	5.46125	5.27036	5.36526	5.3782	5.57011	5.9233	5.89559	5.31856	5.41723	5.47485	5.48912	5.61694	5.44422	5.58856	5.54889	5.5812	5.31832	5.69276	5.89942	5.53416	5.84386	6.22816	5.42801	5.98068	5.55019	5.41175	5.43507	5.63526	5.56395	5.44446	5.5242	5.36395	5.41634	5.42438	5.41114	5.25423	5.29308	5.37179	5.56503	5.87802	5.4705	5.58802	5.40605	5.49254	5.21465
ENSG00000001497	0.653239	8.7986	8.38456	9.17692	8.80626	9.05855	8.74749	9.12221	8.61151	7.65281	7.48819	9.19208	8.81252	9.57594	9.67934	9.39633	9.97416	8.17387	8.42445	7.82593	8.15578	8.44578	7.96196	8.30765	7.97034	8.48575	8.15074	8.03428	8.26133	8.75883	8.16081	7.82625	7.88568	8.04063	8.12235	8.27467	8.16397	8.0362	8.1607	8.32775	7.88568	7.99932	7.73138	8.33973	8.22182	8.00408	8.04817	8.12052	8.51442
ENSG00000001561	0.73395	5.49613	5.40854	5.08927	5.34838	5.43234	5.38564	5.50239	5.2366	5.3791	5.30774	5.50794	5.36288	5.54551	5.61453	5.45971	5.62596	5.51421	5.35113	7.03515	6.30003	5.4191	6.51631	5.69826	7.12485	5.6934	6.05518	8.29671	5.36112	5.50911	5.41503	6.02068	7.32624	6.1062	6.75957	5.58853	6.82257	5.50965	5.98106	7.12686	5.45568	6.39328	6.50716	5.30716	5.83403	7.56495	6.26806	6.36865	5.97357
ENSG00000001626	0.653465	5.0476	5.05586	5.10142	5.03262	4.94627	5.12739	5.00795	5.02943	4.81624	5.0707	4.92782	4.94643	4.97486	4.82354	5.07847	4.91546	5.11987	5.02074	4.84822	4.7808	5.02806	4.99653	4.78087	5.10764	4.94915	5.8573	4.85084	4.88499	4.90543	5.16388	4.96207	4.77553	5.69586	5.05597	5.10885	5.10789	4.85637	6.78074	4.82795	4.96787	5.00914	4.8885	5.40811	5.00361	4.81845	4.90404	4.88178	4.94289
ENSG00000001631	0.690365	5.84851	5.67383	5.62276	5.64918	5.71924	5.77363	5.57344	5.31383	5.86786	5.86895	5.68102	5.77538	5.8202	5.52079	5.60847	5.6998	5.4502	5.48866	5.80712	5.97077	5.07434	5.46781	6.33653	6.1164	5.40422	5.67384	6.36175	4.89929	5.87846	5.5219	5.68517	6.20888	5.70751	5.67606	5.35424	5.83777	5.51791	5.59199	6.88709	6.08487	5.96157	5.65073	5.52754	5.99133	5.72036	5.54531	6.14441	5.93884
ENSG00000002016	0.772431	4.9432	4.99651	5.03596	5.07365	4.85361	4.94327	5.02877	4.95782	5.25451	5.11214	4.97321	5.01653	4.94561	4.98619	5.18789	5.11834	4.96722	5.19141	4.9604	4.92636	5.4929	5.04729	5.17494	5.12531	5.06744	5.05415	5.24633	5.26571	5.26422	5.16748	4.99339	5.10628	5.17063	4.97331	4.997	4.908	5.0085	5.18221	5.08294	5.16746	5.03282	5.08377	5.27949	5.18287	5.09998	5.20514	4.95729	5.12747
ENSG00000002330	0.694519	6.44431	6.58836	6.47116	6.60409	6.54331	6.51145	6.73517	6.50441	7.40932	7.30663	6.86752	6.44404	6.46893	6.59067	6.90925	6.37877	6.88042	7.55417	7.6004	7.18726	6.719	7.86414	7.12211	7.19017	7.85133	7.24866	7.25708	7.70575	6.4047	8.24383	6.82779	7.55265	6.93138	7.22496	6.95979	6.92663	7.6287	6.78019	6.99544	7.29218	7.0856	7.0916	7.23973	7.13167	7.52522	6.99373	6.92919	7.03285
ENSG00000002549	0.928116	9.29442	8.31387	9.06439	8.43012	8.91074	8.79957	8.88256	8.59408	9.18781	9.13445	8.70392	8.83319	8.90143	8.90923	8.86778	8.63437	7.49709	7.49419	7.56311	8.61744	6.7975	7.13432	8.06553	7.25291	6.80717	7.67791	8.12343	6.79638	7.34107	6.56298	8.2714	7.53551	8.37092	10.1098	9.22681	9.46916	7.69164	7.85113	7.16284	8.49825	8.57255	8.48876	6.79731	8.73843	8.42764	9.21353	7.76358	8.35659
ENSG00000002587	0.739093	5.36202	5.2886	5.32503	5.24485	5.39867	5.39554	5.22588	5.40239	5.37456	5.33076	5.2403	5.31501	5.30834	5.24445	5.51135	5.17074	5.67031	5.63884	5.37301	5.45736	5.57125	5.64696	5.61365	5.36132	5.98564	5.3178	5.32154	5.65741	5.39676	5.52571	5.59202	5.61335	5.38303	5.97157	5.32718	5.33833	6.54811	5.26656	5.65713	5.31868	5.28135	5.42352	5.88603	5.19067	5.33965	5.52919	5.40986	5.43232
ENSG00000002745	0.264246	5.72932	5.77214	5.90623	5.47062	5.67647	5.87987	5.80623	5.79495	5.81186	6.03658	5.94763	5.91212	5.76693	5.55191	5.82856	5.72803	6.23471	6.19913	6.05015	6.217	6.8338	6.66782	6.20008	6.06351	6.66784	6.58293	6.43704	6.40006	6.806	6.9206	6.39973	6.23356	6.46716	6.41298	6.34686	6.44731	6.50142	6.5831	6.21747	6.54373	6.18187	6.50367	6.40891	6.82282	6.29192	6.75195	5.89179	6.35802
ENSG00000002746	0.650949	6.04944	6.17294	6.12706	6.06983	5.91391	6.0739	6.12629	6.20505	6.01115	6.27152	5.97238	6.11931	5.93223	5.9292	6.05158	6.26758	6.37668	7.06517	7.11365	6.642	6.8734	6.864	6.81994	7.10952	6.93273	6.99138	6.89582	7.30551	7.07429	6.89031	7.01483	6.83921	6.98423	6.88309	7.03727	6.49442	6.57291	6.86192	6.67703	6.65265	6.48187	6.97806	7.13743	6.69979	6.67541	6.79486	6.74351	6.76197
ENSG00000002822	0.608798	5.61237	6.13493	6.30038	5.90501	6.48988	6.0178	6.53302	5.89876	6.58552	6.70666	6.74046	6.14152	5.73731	6.31158	6.92624	5.72077	5.90126	5.36905	5.46701	5.32889	5.8412	5.80534	5.38861	6.08385	5.81971	5.13619	5.36427	5.96137	5.42577	6.01189	5.163	5.30808	4.92763	5.24511	6.07376	5.4776	5.82907	5.06442	5.31381	5.36783	5.66646	6.17251	5.37108	5.47666	5.67994	5.82667	4.95783	5.98234
ENSG00000002834	0.765086	10.0492	9.89993	10.2014	9.47423	10.2342	9.64876	10.1696	10.0696	10.5739	10.3128	9.75093	9.73602	9.73309	9.75006	10.3365	9.84518	9.63184	9.00831	9.172	8.92973	9.64328	9.29073	9.45558	8.52531	9.22425	9.76156	8.4885	10.1872	9.72233	10.4243	8.31651	9.07134	10.5896	9.06588	8.85284	9.97995	9.76454	8.87599	9.05722	9.47133	8.71086	7.24484	8.75238	8.59989	8.96475	9.76521	10.3599	7.81945
ENSG00000002919	0.699394	7.78791	7.62546	7.79535	7.77575	7.79621	7.74171	7.87288	7.78802	7.98235	7.69085	7.78947	7.75459	7.83626	7.89772	7.76646	7.59083	7.46502	7.98054	7.76355	7.70104	8.10461	7.97101	7.77671	7.86261	8.09704	7.84108	7.93665	7.85251	7.96475	7.75489	7.62714	7.83398	7.66273	7.84507	7.67025	7.86502	7.82436	7.87046	7.74337	7.8601	7.75428	7.77926	7.86431	7.58839	7.89538	8.17494	7.60479	7.89102
ENSG00000002933	0.651669	6.95724	7.22501	7.14485	6.83814	6.83814	6.47901	7.06122	6.86336	7.44768	7.65915	7.15468	6.80215	6.95494	6.63817	6.94433	6.81076	7.92983	9.13375	8.65977	9.28475	8.79269	8.46549	9.33209	8.86886	8.61217	10.1718	8.87443	8.45874	11.0897	8.58764	9.07599	8.42737	10.2453	11.1029	12.7509	9.85291	9.70076	9.46056	8.54543	9.56663	8.45844	8.69661	8.64193	8.67339	9.70309	9.58309	9.25887	8.12843
ENSG00000003056	0.779564	9.01698	8.58263	8.93769	8.78328	9.09307	8.76938	8.75391	9.05094	8.84801	8.67091	8.77227	8.65055	8.87067	8.78865	9.08847	8.87276	7.65963	7.79327	7.30447	7.66003	8.30903	7.48052	7.80128	7.22856	7.11697	7.58462	7.06246	7.13726	7.36634	7.20538	7.80451	7.27397	7.36618	7.72342	7.36116	8.21565	7.57768	7.76993	7.16552	7.4664	7.63957	6.9528	7.56856	7.46028	7.46365	8.75206	7.50657	7.64739
ENSG00000003137	0.847179	7.18576	6.84843	5.56282	5.2973	6.40533	5.20769	5.81605	5.32005	6.73418	6.16474	5.46453	5.50672	5.14457	5.41852	5.44821	5.2499	6.35878	6.36284	7.57821	5.63294	5.75636	7.45553	5.63198	5.4498	9.54366	5.41554	5.80136	6.61109	5.42624	6.63664	5.53643	7.07685	5.67343	5.97092	5.39658	5.84622	5.62568	5.38484	6.13589	6.07764	5.68744	5.71262	5.59189	7.97735	5.66353	5.4528	5.1228	7.69057
ENSG00000003147	0.108315	5.98426	6.07104	6.0894	6.09759	5.94116	5.99934	6.07598	6.19261	5.57948	5.61753	5.92091	5.9022	6.06092	6.04985	5.97515	6.1269	6.09997	6.02463	6.08058	6.03675	6.31617	6.07096	6.20749	6.1784	6.24215	6.28376	5.93022	6.17048	6.06617	6.23787	6.25213	6.15328	6.216	5.96626	6.27073	6.19956	5.92022	6.69868	6.09047	6.01361	6.08846	6.05348	6.45153	6.08144	5.94866	6.16774	6.49359	6.36698
ENSG00000003249	0.755796	6.36412	6.92497	6.79868	6.69537	6.85424	7.18829	6.99106	6.91538	6.09304	6.1914	7.00407	7.12243	6.43198	6.59088	7.21216	6.41744	6.3147	6.48671	6.94233	6.00274	6.36006	7.28093	6.4029	6.62123	6.87607	6.32665	6.44371	7.61339	6.23711	6.30623	6.13561	7.05026	6.06959	6.35541	6.17868	6.06591	6.39141	6.16081	6.14302	6.00329	6.1731	7.24166	6.96567	6.27467	6.88651	6.0792	6.23846	6.21302
ENSG00000003400	0.296124	6.08617	6.20248	6.25065	6.10459	5.87638	6.03966	6.06402	6.2672	6.27284	6.24575	5.97132	6.07492	6.26045	6.01887	6.2067	6.05613	6.53604	7.11437	6.88115	6.70362	7.43183	7.02491	6.78671	7.16315	6.85516	7.08797	6.89521	6.88919	7.14488	7.14898	7.39301	6.88657	7.47399	7.19897	7.14192	6.85109	6.71179	6.96709	6.85161	6.87618	6.79846	7.06892	7.21057	6.78273	6.93894	7.21646	7.18407	6.7825
ENSG00000003402	0.781489	6.24184	6.10872	6.31972	6.30603	6.19455	6.06939	6.30256	6.33906	7.14633	7.07586	5.89618	6.00956	6.58183	6.50318	6.04776	6.35167	6.50992	8.00551	6.87428	7.77029	8.57754	6.67584	7.53152	7.07959	7.04753	7.64498	7.15245	7.11917	7.16264	7.19769	8.5873	6.90973	7.65993	7.71852	7.37376	8.05141	6.77789	7.52157	7.02743	7.51385	7.72311	8.03104	7.54477	8.13814	6.90427	8.30792	7.30982	6.71614
ENSG00000003436	0.281889	5.16029	4.89866	4.70278	4.7549	5.07108	4.74702	4.82191	4.54218	5.83098	5.6732	4.90195	4.96402	5.05925	4.85067	4.73424	4.66794	5.07309	4.89217	4.55465	5.43989	4.80076	4.69152	5.46486	4.757	4.54952	5.30493	4.62522	4.78124	5.8526	5.47315	5.16514	4.65577	5.51064	6.39642	6.34138	6.22282	5.66818	5.5132	4.79771	6.87988	5.85147	5.46241	4.80418	5.35232	4.79657	5.66695	4.9474	4.8159
ENSG00000003756	0.662584	7.89689	7.73798	7.50414	7.63048	7.84069	7.69555	7.66851	7.48117	7.82254	7.92351	7.66322	7.89034	7.87781	7.76023	7.50821	7.81683	8.17004	7.51708	8.19431	8.04043	8.06978	7.82265	8.61073	8.14936	8.15444	7.87595	8.53705	8.29746	8.02172	8.2704	7.46483	8.35208	7.94306	7.16813	7.81796	8.01269	7.83614	7.95242	8.70839	7.89976	7.85368	7.18606	7.20363	8.25957	8.34045	7.84449	8.2061	8.47114
ENSG00000003987	0.789815	4.4026	4.61553	4.50372	4.60752	4.43191	4.55027	4.51098	4.64987	4.53889	4.62098	4.533	4.55763	4.44387	4.47753	4.62511	4.55449	4.60419	4.826	4.8069	4.66793	4.93798	4.81175	4.5931	4.87353	4.67501	4.63082	4.67734	4.73791	4.80373	4.82035	5.21578	4.72686	4.76295	4.85605	4.92142	4.62925	4.6284	4.72266	4.65163	4.71504	4.64005	4.88	4.79903	4.63395	4.9234	4.77081	4.65875	4.78399
ENSG00000004059	0.775113	7.39628	7.6408	7.71884	7.85308	7.61637	7.88816	7.7246	7.72681	7.80354	7.79868	7.77197	7.72301	7.79069	7.73486	7.90556	7.71493	7.83332	8.42664	8.18982	7.82361	8.33743	8.65633	8.15092	7.9387	8.5576	8.28453	7.95255	8.89229	8.18264	8.8211	8.27599	7.98948	8.38957	8.16675	8.08842	8.30648	8.17752	8.39408	7.98065	8.02038	8.05747	8.14695	8.35734	8.16141	7.9858	8.29642	8.21737	9.94379
ENSG00000004142	0.727061	8.72799	8.70726	9.0581	8.89399	8.7417	8.90662	9.08333	8.83469	9.01333	9.11053	9.22714	8.75792	8.75361	8.6629	9.17367	8.66665	8.49911	9.32359	8.43919	8.50995	8.45997	8.8421	8.08718	8.49779	8.97086	8.72646	8.16162	8.66114	8.91365	8.82758	9.21851	8.33572	8.65537	9.00763	9.11339	8.08156	8.27637	8.24079	8.46967	7.8147	8.58707	9.24448	9.04073	8.38151	8.54579	7.97879	8.85352	8.90504
ENSG00000004455	0.763485	7.18863	7.15128	7.10267	6.98727	7.18007	7.17319	7.18538	7.23364	7.19622	7.1529	7.04211	7.08875	7.30289	7.2877	7.10898	7.15799	7.06156	7.0343	6.43209	6.93856	7.62894	6.58011	7.2054	6.53208	6.74224	7.29842	6.81085	6.64429	7.17509	7.00288	6.95564	6.55381	7.42494	7.53714	7.39834	7.22487	6.996	6.94711	6.86513	7.12469	7.09783	7.12356	6.719	6.99091	6.83063	7.26327	7.30942	6.83892
ENSG00000004468	0.246837	6.2304	6.75436	6.56084	6.55245	6.24587	6.59605	6.38589	6.44204	6.52714	6.65634	6.3651	6.2959	6.81123	6.24932	6.45394	6.63642	6.69591	6.85771	6.87045	7.08859	8.77037	6.84129	7.31497	7.10205	7.18352	7.45154	7.33105	7.1589	7.83766	7.25005	6.55818	6.80299	7.79326	6.93852	7.64611	7.61869	7.04819	7.13293	6.91932	7.09723	7.04938	7.28632	6.7039	7.01958	6.98259	8.59613	6.94874	6.96973
ENSG00000004478	0.851817	8.58142	9.00183	8.71797	9.05799	8.76452	8.95023	8.94235	9.11393	7.97447	7.87878	8.82309	8.82067	9.14784	9.32639	9.11619	9.34978	8.15874	8.11632	8.28082	7.98803	7.84081	8.81103	8.11728	8.09617	9.51172	7.71866	7.74414	8.30522	8.80115	7.96671	7.74575	8.1712	7.6893	8.18694	7.95284	7.29068	8.93084	8.06304	7.53882	7.72722	8.44406	8.72072	8.09381	8.46118	7.89623	7.50496	8.09398	8.3864
ENSG00000004487	0.919448	9.56032	9.81422	9.16225	9.97079	9.40684	9.82233	9.40731	10.1432	8.10457	8.23092	9.75959	10.0468	10.095	9.77424	9.30708	9.85435	9.6374	7.97939	7.49615	8.10721	8.17134	8.17025	8.31275	7.7294	8.35092	8.11793	7.56183	9.37216	8.70792	8.56181	7.85781	7.87274	7.52746	7.82871	7.92523	7.76892	8.64759	7.89964	8.42688	7.98684	8.19721	8.14028	8.02744	7.81636	7.97043	7.84709	8.49341	9.89234
ENSG00000004534	0.647695	8.51689	8.37653	8.35102	8.28989	8.76508	8.41718	8.56127	8.15279	8.27422	7.86133	8.8504	8.48564	8.45167	8.76583	8.96733	8.58535	7.65287	7.41732	7.29331	7.35689	7.23186	7.40024	7.82967	7.22318	8.33734	7.2019	7.18274	7.41549	7.30806	7.38598	6.78973	7.22208	7.7253	7.02772	7.39197	7.77837	7.4906	7.29509	7.88889	6.92428	7.3819	6.64104	6.92556	8.20232	8.05463	7.30227	7.94698	8.06883
ENSG00000004700	0.179407	7.20202	6.39157	6.46597	6.51994	6.48384	6.87198	6.43875	6.1746	7.7626	7.56681	6.74894	6.78762	6.59671	6.6351	6.11396	6.49421	5.47458	4.73945	5.05139	5.98281	4.82415	4.87701	5.67577	5.05094	4.81946	5.36393	5.38991	4.75365	5.39396	5.1952	5.27921	5.26108	5.15711	5.33025	5.21497	6.02857	5.37462	5.48932	5.41069	5.89771	6.18668	5.33817	4.76078	6.08069	5.25128	5.97869	5.30289	5.07876
ENSG00000004766	0.67475	4.73815	4.86796	4.87892	4.95916	4.76133	5.00064	4.86015	4.87398	4.96792	5.04249	4.95257	4.83599	4.85567	4.68569	4.79033	4.72968	4.91701	5.10436	5.00538	4.9035	5.04493	4.89499	4.88007	5.59651	5.01976	5.06333	4.97511	5.14407	5.06241	4.91082	5.16181	5.02787	5.14743	5.16496	4.90538	4.91859	5.14585	5.1638	5.15056	5.00405	4.97878	5.06341	5.07837	5.02221	5.10459	5.08993	4.90568	5.03616
ENSG00000004776	0.560284	6.79326	6.85122	6.70808	6.73695	6.92365	6.66082	6.83813	6.81044	7.19933	7.35228	6.70912	6.69572	6.86999	6.25748	7.0654	6.62881	7.35723	9.97092	8.06564	9.10546	8.00764	7.8289	7.15873	7.79562	7.87372	8.01629	7.72241	7.64987	7.78166	8.17593	10.5891	7.53886	8.20246	7.98142	7.64749	7.7322	8.63091	7.87638	7.94095	7.74082	9.30358	9.57864	7.98596	7.44361	8.89532	7.86203	7.85283	8.17778
ENSG00000004777	0.80668	6.82374	7.14587	6.9503	7.05591	7.04578	7.01117	7.05343	7.16721	6.69844	6.75875	6.91525	6.84566	7.1058	6.69483	6.93264	6.92865	7.26401	7.66562	7.85686	7.22035	7.26122	7.69503	7.16033	8.20695	7.7169	7.35016	7.83556	8.54255	7.23157	7.60647	7.64617	8.01249	7.48924	7.21859	7.35953	6.82376	7.16007	7.98343	7.70422	7.18058	6.99835	7.38959	7.66771	7.15747	8.04657	7.14669	7.52532	7.75505
ENSG00000004779	0.736528	11.2163	11.2692	11.0098	11.3525	10.9906	11.222	11.1141	11.3374	10.6875	10.6784	11.2182	11.3356	11.4741	11.5454	10.6471	11.4361	11.486	10.1214	10.7264	9.93249	9.45857	10.9531	9.54974	10.3252	10.7801	10.1744	10.1575	10.1274	10.3618	9.06147	11.5855	10.7333	10.1773	9.92272	10.1932	9.69771	9.85443	9.15654	10.4653	10.2549	10.3131	10.7692	10	9.80716	9.82842	9.07931	10.1252	9.45109
ENSG00000004799	0.5822	4.6473	4.59844	4.55051	4.78589	4.60221	4.73491	4.52573	4.72837	4.63782	4.73418	4.62054	4.6359	4.73504	4.85425	4.59963	4.94336	4.83039	6.48013	5.32882	8.02721	5.37563	5.28598	5.50467	5.2076	4.84828	8.60241	5.71379	5.25208	4.78734	5.27969	7.71776	5.23392	5.44094	7.2529	6.12236	5.59723	6.11814	7.56898	5.12894	5.88874	9.4975	8.36889	5.4	6.81066	5.19346	7.42211	6.4722	5.48638
ENSG00000004838	0.252862	5.3656	5.66787	5.43414	5.57892	5.4699	5.71723	5.56899	5.7165	5.65472	5.5671	5.44165	5.51969	5.62088	5.62397	5.6112	5.67875	5.70854	5.73218	5.69128	5.78226	6.33394	5.99524	5.85801	5.93951	5.72909	5.74067	5.96995	5.93514	5.79181	6.75033	5.87271	5.57271	5.86776	5.94653	5.86668	5.99822	5.71855	5.8386	5.68038	5.86479	5.55305	5.94988	5.99787	5.44658	5.79127	5.9868	5.72197	9.03184
ENSG00000004948	0.560241	5.1275	5.25316	5.17407	5.42806	5.14937	5.49304	5.15804	5.32647	5.1061	5.16981	5.07123	5.25302	4.99286	5.2004	5.11241	5.33012	5.30394	5.73588	5.55649	5.55435	5.60689	5.57767	5.45294	5.56163	5.62869	5.52804	5.51698	5.73308	5.57173	5.66292	5.60909	5.50796	5.58657	5.68156	5.54556	5.5283	5.74732	5.71454	5.62865	5.43381	5.31447	5.66196	5.88465	5.61248	5.58037	5.66122	5.54924	5.63388
ENSG00000004961	0.608012	8.61541	8.41927	8.42059	8.63627	8.71454	8.57545	8.55672	8.73331	8.78128	8.77848	8.86306	8.62081	9.66707	9.77193	8.19783	10.1057	7.78126	7.52342	6.84078	7.09627	7.26521	7.72528	7.05808	7.0784	7.37384	7.65131	6.57546	6.85651	7.17112	6.75626	7.93107	6.9058	7.16124	7.45285	7.36394	7.14483	7.24634	6.49187	6.68677	7.47969	7.42364	7.68195	7.08182	7.29796	6.74146	7.17449	7.49286	7.17615
ENSG00000004975	0.612821	6.90599	7.63436	7.62883	7.83379	7.51366	7.64797	7.51792	7.51277	7.43344	7.31292	7.66205	7.62131	7.57957	7.70039	8.19611	7.72669	7.63985	7.47622	6.92219	7.22157	7.26508	7.16342	7.35307	7.24667	7.6317	7.20965	7.44681	7.29356	7.2018	7.8105	7.58306	6.94104	7.22919	6.83254	6.67434	6.93912	7.57163	6.47932	7.52703	6.88685	7.34506	7.3284	7.35979	7.39108	7.1403	7.04725	7.2214	7.23618
ENSG00000005007	0.855801	7.31337	7.69864	7.64882	7.62234	7.51702	7.50968	7.63532	7.50181	7.29796	7.35734	7.42031	7.50094	7.47359	7.51689	7.72196	7.41238	7.29259	7.26166	7.70639	7.67526	7.51882	7.09477	7.70226	7.1604	8.09668	7.85623	7.55845	7.26876	7.40971	8.08095	7.00455	7.26809	7.2887	7.24359	7.26939	6.96549	8.03366	7.37451	7.38558	7.57559	7.79033	7.06444	7.93307	8.03051	7.16155	7.7684	7.1661	8.10054
ENSG00000005020	0.712337	4.48528	4.55015	4.43541	4.53683	4.37254	4.62103	4.38645	4.49922	4.91502	4.82135	4.47852	4.3909	4.58062	4.38539	4.46024	4.49451	4.599	5.22642	5.14512	6.07098	6.25011	5.14607	5.19444	4.65764	4.81589	5.51792	4.78818	4.78753	4.99749	5.06635	4.78353	5.01523	5.14755	5.99958	4.90163	5.82325	5.16443	5.19681	4.76581	5.01224	5.1289	4.82692	4.75715	5.1731	5.34944	6.27704	4.99327	5.61456
ENSG00000005059	0.839022	8.85612	8.77212	9.28897	8.4227	9.05757	9.12003	9.29488	9.0263	8.20063	8.0356	9.37638	8.66675	8.27613	8.36479	8.4054	8.53851	7.06236	6.41124	6.597	7.26668	7.52255	6.71865	7.36912	6.46175	6.4246	7.01271	6.83686	8.19256	6.70747	6.43206	6.75819	6.5501	6.48745	6.56974	6.66807	7.44707	7.13573	7.55522	7.17164	8.08615	7.87829	6.64483	6.69662	8.07825	7.51462	8.11591	6.76478	6.58474
ENSG00000005075	0.437447	9.23879	9.31764	9.80772	9.21445	9.47534	8.87065	9.4596	9.30038	9.34529	9.14648	9.29914	8.93332	9.42751	9.30065	9.79672	9.2826	8.91586	9.87187	8.96855	8.7988	9.74533	9.09226	9.06472	8.59537	8.93447	8.97998	9.20898	9.07187	9.69701	9.70199	9.54573	8.65496	9.17601	9.003	9.0988	8.74339	9.36519	8.76907	9.07495	8.82327	9.26733	10.704	9.44524	8.94824	9.515	9.056	9.22968	9.0601
ENSG00000005175	0.707762	7.43123	6.24946	6.45211	6.78977	6.8414	6.96786	6.97434	6.16604	6.98655	6.65978	6.98889	6.89397	7.10392	6.94681	5.65457	7.11906	6.55701	4.26441	4.98476	5.26629	4.2248	4.76072	5.21284	4.7378	4.41772	4.86383	5.08559	4.28486	4.91082	4.70233	5.10296	4.9981	4.85061	5.07832	5.08855	4.96804	6.74304	4.82809	5.27171	5.49867	5.52279	6.41078	4.3015	5.28192	5.35565	5.02961	4.84772	5.95778
ENSG00000005187	0.198497	5.18106	5.09755	5.20978	5.23868	5.01447	5.15161	5.04004	5.20934	5.28586	5.28402	5.13414	5.39008	5.64881	5.68192	5.25441	5.64532	5.55147	5.6437	5.47099	5.49816	5.69376	5.56746	5.44211	5.55744	5.40039	6.49979	5.38874	5.40687	6.84659	5.81715	6.13801	5.50219	5.90217	6.98162	7.66123	5.79174	7.38426	6.49138	5.57095	5.52089	5.90427	5.66979	5.91923	5.62179	5.64167	5.72519	7.60994	5.74552
ENSG00000005194	0.754587	9.58734	9.36436	9.71363	9.72243	9.75854	9.67583	9.59093	9.26559	9.14767	8.9988	9.85333	9.42721	9.3902	9.50479	9.52961	9.24185	9.58276	8.14943	7.91696	7.55426	7.45871	8.44976	7.5536	7.67812	8.60323	7.76627	7.5781	8.55613	8.19176	8.12837	7.97886	8.16046	7.4879	7.91031	7.77885	7.85132	7.72923	7.43298	7.8413	8.19005	7.92939	7.27573	7.4241	7.79974	7.67885	7.50358	7.61885	9.67271
ENSG00000005206	0.767277	5.63281	5.81511	5.51413	5.7511	5.52596	5.86878	5.5266	5.7637	5.71081	5.75075	5.75139	5.74208	5.76986	5.69199	5.89952	5.66291	5.6472	6.15093	6.12538	5.89999	6.25557	6.0204	5.97759	6.19896	6.11664	6.22685	6.1606	6.05825	6.12837	6.63676	6.13319	6.03735	6.39558	6.05821	6.05403	5.84342	5.9856	6.4958	6.03038	5.91133	5.84932	6.12475	6.43629	5.98153	6.07323	5.98494	6.00514	6.09946
ENSG00000005238	0.57943	7.37339	7.63595	7.80267	7.60209	7.52092	7.59486	7.58086	7.5599	8.59904	8.31447	7.74821	7.62582	7.82265	7.59358	7.64712	7.62403	7.83983	8.24012	8.37004	8.05119	9.10402	8.45229	7.73621	8.33955	8.44634	8.02386	8.42458	8.58966	8.51216	8.13657	8.54873	8.23525	8.0227	7.77511	7.64222	8.30173	7.66147	8.03122	8.20322	7.88839	8.10227	8.15457	8.15793	7.99473	8.72044	8.15424	8.13962	7.97322
ENSG00000005243	0.657261	7.46438	7.27323	7.37391	6.86876	7.06857	6.942	7.25317	7.15352	10.2429	10.2374	7.5044	7.3716	7.00163	6.76442	7.53689	7.05863	7.93981	8.42547	7.53062	8.32654	8.17148	7.33147	7.87526	7.71477	7.56598	7.86324	7.95924	7.84297	7.7861	8.04776	8.07527	7.39353	7.91573	7.8919	8.18676	8.0441	7.69097	8.0506	7.50837	8.17488	8.20631	8.99857	7.94355	7.97612	8.45827	7.89631	7.77102	7.66082
ENSG00000005249	0.985152	9.22551	8.74603	8.72182	8.59255	9.31938	9.32317	9.41586	8.7758	5.91372	6.23663	8.90921	8.94804	8.06124	8.51325	8.28515	8.50267	7.59806	8.69918	9.19	8.64164	7.71593	8.64784	7.72642	9.29203	6.8102	7.77797	7.35967	9.98788	9.06628	6.33374	7.50514	9.3734	6.69951	6.79733	6.07559	6.90027	8.87426	7.02192	8.82318	7.83735	7.61404	6.09024	6.25369	7.09988	7.25902	8.58593	6.95935	8.63903
ENSG00000005302	0.804688	6.71212	6.32884	6.52131	6.38427	6.83587	6.57825	6.69148	6.39332	6.93029	6.71218	6.66778	6.48917	6.92118	6.77628	6.42134	6.8837	6.96878	6.39464	6.56032	6.43021	6.70555	6.59195	6.68268	6.3887	6.59689	6.42448	6.29617	6.61787	6.19618	6.29771	6.46466	6.46613	6.16511	6.26074	6.0911	6.62297	6.43886	6.48793	6.32226	6.29974	6.51955	6.88998	6.43225	6.4871	6.31323	7.12574	6.56008	6.63884
ENSG00000005339	1.00317	6.91091	6.80739	6.88945	7.11941	6.86588	7.09604	6.8349	6.89147	6.78542	6.58572	6.89422	6.96962	6.84547	6.71358	6.75647	6.82036	6.51265	6.80652	6.59982	6.54829	6.90815	6.61462	6.92232	6.42377	6.90575	6.54282	6.35386	6.91288	6.32847	7.25104	6.50598	6.61712	6.40565	6.61295	6.01923	6.44431	6.75971	6.55728	6.60612	6.4499	6.81232	7.35239	6.71375	6.80268	6.66419	6.9688	6.31509	7.17659
ENSG00000005381	0.106996	5.07436	5.08989	5.09198	5.27142	5.01089	5.28294	5.12672	5.2345	5.17438	5.14023	5.122	5.02677	5.32372	5.10715	5.185	5.15208	5.48417	5.47262	5.53309	5.20903	11.0712	5.50286	5.38409	5.61944	5.43108	5.34528	5.50257	5.45594	6.98633	5.96068	5.57077	5.36707	5.47657	5.28556	5.50701	5.24126	5.26933	5.40497	5.55356	5.34235	5.22479	5.4641	5.68564	5.15917	5.62629	5.36949	5.48349	5.51273
ENSG00000005421	0.356815	4.94459	5.11703	5.21184	5.18393	4.9007	5.04997	4.94981	5.10664	4.9804	5.12787	5.12382	5.0053	5.11004	4.99885	5.12671	5.05082	5.18642	5.9959	5.19866	5.12836	5.29781	5.33076	5.26538	5.44657	5.21984	5.29287	5.49145	5.4776	5.82262	5.4338	5.30246	5.27054	5.54319	5.26798	8.27241	5.19523	5.16978	5.21057	5.38999	5.25167	5.16407	5.25935	5.62581	5.10738	5.12135	5.31229	5.3963	5.26906
ENSG00000005436	0.530189	5.30136	5.05319	5.18193	5.3015	5.48182	5.41444	5.53385	5.23307	5.61024	5.31494	5.75624	5.28538	5.45648	5.32711	5.13982	5.20014	5.2715	5.10345	5.29466	5.23532	5.01501	5.19751	5.31834	5.36833	4.99396	5.2025	5.49214	5.04192	5.42379	5.25108	5.4337	5.3981	5.13754	5.43444	5.56907	5.37189	5.22728	5.26163	5.71138	5.40408	5.46997	6.36656	5.2734	5.3783	5.49924	5.39028	5.36836	5.59119
ENSG00000005469	0.646706	6.20561	6.21278	6.02715	6.25798	6.23706	6.15562	6.13148	5.96328	6.77549	6.97116	6.14987	6.21601	5.9655	6.10451	6.2925	5.98242	6.21542	6.65277	6.47953	7.00526	6.2238	6.24812	6.9505	6.50453	6.77752	6.94302	6.29883	6.04328	7.14394	6.21292	6.4478	6.76202	7.21607	6.38546	7.1882	6.70207	6.65241	6.15059	6.65628	7.54244	6.82354	6.40013	6.1956	7.17563	6.45393	6.17566	6.51616	6.07152
ENSG00000005471	0.714881	5.2379	5.38179	5.01855	5.30012	5.03136	5.07557	5.12363	4.96989	5.04798	5.17345	5.01415	5.04709	5.03983	5.20238	5.17143	5.12965	5.5477	6.59726	5.18246	5.59952	5.66606	5.11601	5.1616	5.23974	5.14336	5.43008	5.32122	5.41817	6.37974	5.51318	5.90206	5.24124	5.56017	5.42614	9.34621	5.1314	5.26402	5.47407	5.45075	5.27091	5.18719	5.94521	5.75798	5.13273	5.21221	6.21221	5.33927	5.1941
ENSG00000005700	0.543931	5.30877	4.89097	4.94201	4.93135	5.12996	5.07094	5.19284	4.78316	5.77153	5.40259	5.10097	5.12966	5.16312	5.06253	4.90749	5.05227	4.83091	4.64679	4.8481	4.94596	4.38159	4.63939	4.92069	4.84452	4.69849	4.86805	5.16487	4.23995	4.95851	4.53777	4.80123	4.91063	4.80795	5.0132	5.19566	5.07613	4.94757	4.96205	5.39375	4.94245	5.18856	5.00111	5.03621	4.82943	5.09766	4.8168	5.45182	4.64326
ENSG00000005801	0.403743	9.13727	8.41792	9.00629	8.64421	8.90412	8.77067	8.34387	8.52337	6.8082	6.7678	8.78724	8.68791	8.68576	8.71454	8.63449	8.46685	7.36377	5.90422	6.17691	6.19059	5.41486	6.1525	6.4212	6.4046	5.82374	6.25344	6.45193	5.85184	6.00922	6.31702	6.35611	6.32646	6.67296	6.30156	6.08417	6.61008	6.09325	6.42386	6.29751	6.38575	6.15157	6.10466	5.95679	6.00674	6.20719	6.1988	6.36696	6.17836
ENSG00000005810	0.689114	8.5788	8.65104	8.53868	8.50371	8.57842	8.37255	8.38791	8.31777	9.15425	8.96894	8.46051	8.21895	8.10499	8.06118	8.2649	7.83058	8.41649	7.70847	9.8478	9.12032	7.45366	9.42965	8.97567	9.0534	9.29244	7.95575	8.7143	8.6676	7.79874	7.48599	7.63239	10.0845	8.0149	8.02487	7.64435	8.56491	9.13672	8.18736	8.97063	8.07281	8.80162	7.93224	7.04412	9.82022	8.15071	8.99931	8.40509	9.03623
ENSG00000005882	0.799924	6.29547	6.39311	6.60223	6.53708	6.44158	6.39656	6.62152	6.4657	6.97144	7.08583	6.60979	6.51315	6.44739	6.52997	6.62173	6.57195	6.69253	8.02324	8.13245	7.46673	7.22107	8.01021	7.26619	8.15014	8.71641	7.58938	7.61671	7.83577	7.08662	8.34785	8.27599	8.08925	7.47899	7.71584	7.67074	6.96143	7.61228	7.3004	7.29069	7.13438	7.50403	8.25114	7.88067	7.07537	7.78102	7.26446	7.08459	7.09185
ENSG00000005889	0.523413	4.40927	4.4552	4.37583	4.45835	4.44594	4.54371	4.50882	4.51445	4.56279	4.55229	4.502	4.45362	4.65626	4.63512	4.51861	4.68846	4.49762	4.55463	4.52147	4.64719	4.52724	4.33735	4.52976	4.49879	4.43415	4.57443	4.4809	4.49559	4.64895	4.56989	4.57363	4.42936	4.41567	4.57698	4.51198	4.4925	4.5669	4.52869	4.49735	4.92235	4.56302	5.07599	4.55794	4.52594	4.46513	4.56655	4.39288	4.5943
ENSG00000005955	0.746624	8.08836	8.39264	7.73242	8.11719	8.09044	8.14506	7.85714	7.68688	8.43831	8.59227	7.92098	8.3063	8.06116	8.22422	7.33759	7.85881	8.3749	6.79324	8.63771	8.2823	7.26829	8.10462	8.277	8.8237	8.379	8.37499	8.65117	7.27703	8.32454	7.24322	7.2297	8.93235	8.48672	7.69362	8.2722	8.45946	8.10985	8.21424	9.07676	7.94389	8.47941	7.62088	6.30816	8.53709	8.58804	7.83709	8.5332	9.30826
ENSG00000005961	0.146209	5.34678	5.54453	5.50456	5.55383	5.41964	5.45336	5.49126	5.58092	5.18886	5.30034	5.31808	5.43111	5.53537	5.53884	5.65518	5.5723	5.50663	5.56891	5.30544	5.18197	6.62455	5.39289	5.21831	5.50869	5.54165	5.34911	5.25406	5.50099	6.34501	5.80143	5.50541	5.25921	5.61257	5.24006	5.53961	5.27568	5.28796	5.33751	5.36074	5.28423	5.18315	5.41238	5.75906	5.27228	5.35149	5.51071	5.28377	5.36254
ENSG00000005981	0.371738	4.84966	4.8281	4.81951	4.91336	4.77341	4.87653	4.80808	4.89137	4.83595	4.91731	4.74681	4.84298	4.86374	4.74299	4.77559	4.80428	4.91135	5.62099	5.06549	4.9002	5.21619	5.32389	4.89347	5.18338	5.0477	5.15425	5.05053	5.20972	5.14061	4.914	5.27419	5.00879	5.06804	5.1057	5.1703	4.97526	4.96643	4.93136	5.09557	4.96461	4.94511	5.4488	5.18287	4.91089	5.15402	5.0871	4.93306	5.01757
ENSG00000006007	0.454198	7.8193	6.63517	6.71801	7.39598	7.47931	7.60404	7.55354	7.29215	7.29143	7.57499	6.59786	7.05557	6.84229	7.16785	6.63284	7.21035	7.23069	7.68851	9.04027	8.44156	8.05238	8.96809	7.97258	8.82634	7.25383	8.60396	8.83255	7.93369	7.09391	7.91694	8.44629	8.95718	7.67512	8.73744	7.0257	8.2528	7.735	7.82932	7.90106	8.44377	8.0162	9.11692	7.6274	7.8808	8.35856	7.37296	8.16546	8.3549
ENSG00000006059	0.197753	5.18021	5.04307	5.41551	5.41701	5.10529	5.19558	5.06796	5.32009	5.55473	5.66964	5.27943	5.19087	5.3796	5.00424	5.23429	5.25134	5.44045	5.63262	5.55696	5.69252	5.87118	5.72971	5.63373	5.57806	6.27479	5.46769	5.43731	6.0056	5.97039	5.79571	5.7035	5.45759	5.50098	5.49495	5.4248	5.70316	5.48873	5.64634	5.20117	5.38917	5.53758	5.58398	5.5687	11.8113	5.38951	5.3844	5.22162	5.93955
ENSG00000006062	0.802807	5.63875	5.95833	5.91832	5.78286	5.6784	5.5305	5.8736	6.09153	5.88715	6.08361	5.5583	5.58611	5.7099	5.65346	5.67719	5.90132	6.16324	7.14902	6.73885	6.95767	7.04978	7.06128	7.05667	7.35261	6.97534	7.08185	6.5202	6.83073	6.66764	7.12821	7.34599	6.81253	6.99268	7.20136	7.03131	6.8782	6.68833	7.09987	6.93149	6.59215	6.84009	7.35604	6.97718	6.78078	7.09965	7.15474	6.70985	7.02461
ENSG00000006071	0.539921	5.58887	5.67232	5.72756	5.78593	5.53381	5.7049	5.58765	5.6072	5.6583	5.78259	5.47331	5.56451	5.53668	5.61556	5.56865	5.96963	5.81289	6.52033	6.57353	6.03569	6.44871	6.87618	6.32546	6.79787	7.22907	6.19496	6.07043	6.50502	6.12035	6.38796	6.45379	6.5923	6.07459	6.18784	6.08422	5.84168	6.12285	6.40835	6.92528	5.81456	5.9999	6.35621	6.67575	5.95687	6.7044	6.15379	6.16908	6.08525
ENSG00000006118	0.457559	7.39044	8.16079	7.99571	7.96277	7.90918	7.88269	7.78672	7.86276	7.23118	7.40464	7.65001	7.59854	7.41988	7.42987	8.48337	7.31614	7.80012	7.39397	8.97397	6.27833	7.125	8.46792	6.70673	7.88647	8.9846	6.44701	7.92142	8.85895	6.79242	8.03797	6.66943	8.42172	6.48907	6.57941	6.36618	6.40556	7.06919	6.83318	7.11834	7.66646	6.38775	6.82779	7.7447	6.62477	8.27377	6.6891	7.32551	6.32072
ENSG00000006125	0.55085	8.64107	8.53214	8.80841	9.01235	8.99278	8.71987	8.91141	8.69761	8.71863	8.93155	9.02552	8.64716	8.83811	8.76576	8.87595	8.97495	8.38629	8.17966	8.96566	8.02907	8.71887	8.35121	8.70739	8.61652	8.02329	8.27763	8.36062	10.2698	8.26473	8.49837	8.54069	8.77043	7.99809	8.88643	7.34618	7.64729	8.28936	8.04837	8.26391	7.95863	8.18834	8.25233	7.95007	7.70642	8.71156	8.35751	7.69567	9.93572
ENSG00000006194	0.810928	7.82486	8.02371	8.07169	8.05828	7.99488	7.98417	7.7869	8.06144	7.62411	7.64864	7.88073	7.78827	8.45917	8.30089	8.03053	8.17221	7.78974	7.4728	7.58602	7.76969	7.81079	7.84523	7.83072	7.59057	8.23971	7.49312	7.51047	7.77685	7.63218	7.51234	6.94572	7.73608	7.23586	7.21297	7.22873	7.9731	8.05081	7.22918	8.09402	7.45326	7.59447	6.68292	7.28076	7.60314	7.38469	7.16264	7.76269	7.3906
ENSG00000006210	0.242735	6.22899	6.53346	6.17717	6.23748	6.29757	6.43738	6.10696	6.23356	6.29129	6.33011	6.38071	6.41888	6.48916	6.38008	6.15792	6.4548	6.7462	7.21656	8.46248	7.72775	6.98045	9.32236	9.26511	8.77048	7.83971	6.56755	7.49944	7.99717	6.76271	7.41699	7.4493	8.70184	6.89494	7.54897	6.83697	8.70178	7.06109	6.83466	7.13583	6.56294	7.41106	6.96617	8.08518	7.53093	8.00256	6.45983	7.03762	6.58697
ENSG00000006282	0.546727	7.85141	8.44206	8.05097	8.22301	7.98161	7.63716	8.13156	8.04049	9.61726	9.65362	8.21776	8.44467	7.98607	7.86851	8.24373	7.88273	8.43297	9.61208	8.69327	8.68311	8.07883	8.94251	8.78387	8.49185	9.42299	8.88261	8.29901	8.42602	8.43441	9.66294	8.79214	8.77207	8.35424	8.95519	8.83371	8.42195	8.77735	8.46229	8.92203	7.7056	8.36134	8.19436	8.78235	7.96134	9.25144	8.22799	9.04001	10.823
ENSG00000006283	0.795166	5.6553	5.66234	5.73266	5.68325	5.63231	5.72943	5.6374	5.84925	5.75361	5.71208	5.55475	5.73292	5.71583	5.63209	5.74431	5.69529	6.03641	5.91337	6.07445	5.76003	5.95014	6.07466	5.90008	5.9651	6.77976	5.89563	5.86061	6.32966	5.89053	6.33537	6.02355	6.12447	5.72903	5.84997	6.00308	5.59608	6.30934	6.00041	5.78039	5.76475	5.81153	5.8701	6.06634	5.74409	5.90608	5.89428	5.83116	5.83684
ENSG00000006377	0.639248	5.52701	5.4773	5.3238	5.35152	5.29714	5.62713	5.45627	5.30557	5.31342	5.29186	5.30781	5.29379	5.17069	5.28933	5.36642	5.10546	5.70562	6.06251	5.66737	5.73981	6.06389	5.57483	5.63357	5.84335	5.64459	5.83319	5.54717	5.66496	5.80242	5.93188	5.78214	5.64073	5.65236	5.81916	5.64508	5.63019	5.52061	5.79968	5.62654	5.849	5.63883	6.27126	6.20986	5.37529	5.77952	5.77726	5.53572	5.81795
ENSG00000006432	0.822785	5.7706	6.14327	6.27478	6.34408	6.31443	6.28804	6.04161	5.95332	5.55539	5.72098	6.5688	6.03993	6.12677	6.03596	6.23714	6.19423	6.08036	6.30151	6.96645	5.9876	6.24678	7.16123	6.32473	6.66542	7.73719	6.05146	6.1516	7.36572	6.19498	6.23084	6.19483	6.98041	6.48256	6.15607	6.27345	6.30472	6.02593	6.48823	6.47245	5.99991	5.81199	6.12414	6.13036	6.50408	6.46283	6.21803	6.10753	6.73391
ENSG00000006451	0.703557	6.98682	6.53384	6.72008	6.8475	6.97772	7.26925	6.81677	6.61733	8.11155	7.89758	7.89387	7.07428	7.57543	6.79412	7.26439	7.60041	5.19358	5.11742	5.1259	5.0949	4.82743	5.16818	5.63913	5.20646	4.8384	5.58666	5.79397	5.77712	5.0354	5.44897	5.40986	5.21132	5.85542	5.7078	5.38623	5.70313	5.53643	5.36921	5.47281	6.0835	5.44006	5.32477	5.0793	5.9662	5.13529	5.12449	5.5284	5.86682
ENSG00000006468	0.593277	6.88665	6.67637	6.73455	6.63594	6.82282	6.9381	6.99404	6.83533	6.51104	6.44833	6.93879	6.99264	6.85628	6.64397	6.46541	7.0996	6.76216	6.83653	7.15292	6.52907	6.71148	7.03943	7.1178	6.84595	7.86574	6.71818	6.60799	7.22669	6.75994	7.12953	7.19308	6.91061	6.38402	6.39142	6.54451	7.40542	6.37049	6.31651	6.6206	6.41916	6.35857	6.42572	7.58199	6.49067	6.45279	6.63485	6.49249	6.76453
ENSG00000006534	0.321064	6.92153	7.27634	7.12017	6.92706	6.96363	7.15771	6.98571	7.1204	7.57731	7.6721	6.82245	7.05311	7.19816	7.11144	7.16511	7.15025	7.09232	7.96496	6.84885	7.18106	8.31739	6.92829	6.99629	7.02563	6.91665	7.36578	7.26728	6.89643	7.2095	7.37088	6.97504	7.07733	7.55774	7.18058	7.19063	7.9008	6.90498	7.08829	7.16169	7.00834	6.87855	7.07039	7.58342	6.93673	7.09247	7.35429	7.43081	6.80862
ENSG00000006607	0.819932	5.3269	5.54113	5.38525	5.47565	5.21173	5.5059	5.43432	5.55686	6.01736	5.89537	5.30654	5.40442	5.56052	5.54011	5.70906	5.6789	5.70011	6.12673	6.40344	6.15981	6.04481	6.61203	6.11982	6.43634	7.4875	6.4148	6.64367	6.01487	6.36228	6.23931	5.78733	6.41687	6.62687	5.96983	6.24582	6.12212	6.27736	6.04939	6.42423	5.76984	5.89671	6.04496	6.06334	6.26354	6.46759	6.10311	6.47025	7.04268
ENSG00000006611	0.621367	5.69636	5.92006	5.89931	5.92504	5.84112	5.79171	5.91637	6.04928	5.89253	5.82644	5.84661	5.87214	6.00047	5.72481	5.92293	5.97433	5.99448	6.94386	6.85675	6.35095	6.80013	6.93639	6.30262	7.26718	6.52257	7.7357	7.86981	6.74029	6.55642	6.48457	7.00208	6.96006	8.25449	7.67856	6.44312	6.27842	6.54133	6.72515	6.88586	6.34106	6.20939	6.62917	6.78947	6.26652	7.98426	6.61416	6.89352	6.5652
ENSG00000006625	0.624226	11.0816	10.8673	11.0218	11.0948	10.9627	11.2689	11.0368	10.6065	10.342	10.1479	11.2867	11.166	11.0627	10.8493	11.082	11.0637	10.3452	8.3833	9.10194	8.71942	8.54306	8.93135	9.44301	8.59629	8.49786	8.18945	8.35716	8.15597	8.9951	8.48878	8.18801	9.01265	8.35517	8.56687	8.39753	8.93651	8.44132	8.83035	8.7392	9.41708	8.91445	7.5593	8.61405	9.66234	8.30917	8.42778	8.51705	8.31929
ENSG00000006634	0.780821	8.87765	8.63044	8.86393	8.46627	8.99876	8.64857	8.94226	8.43833	5.85021	5.85341	8.93095	8.5918	8.16866	8.36147	8.46946	7.86261	6.90948	5.06372	5.09689	4.99909	5.16212	5.11696	5.20014	5.43044	5.33638	5.19826	5.08338	5.16961	6.69461	4.92537	5.18863	5.27682	5.31207	5.14598	5.29902	5.26797	5.25574	5.33042	5.1018	5.41065	5.28409	5.07928	5.29557	5.27529	5.12267	5.22039	5.37423	9.24592
ENSG00000006652	0.150371	9.31952	8.45377	8.9071	8.48851	8.65035	8.673	8.70615	8.20609	6.09069	6.07628	7.69409	8.08336	7.63304	7.75825	7.51465	6.92791	7.37792	5.522	6.36774	6.77625	6.09664	5.88854	6.88684	6.0717	5.72518	6.08544	6.97098	5.91122	5.52272	5.29204	5.68962	6.51666	6.2174	5.07079	5.97108	7.1017	6.49269	7.32634	6.91614	6.45549	8.08396	6.85896	5.25356	6.94242	6.77853	5.96286	6.6146	6.65339
ENSG00000006704	0.597623	7.81147	8.11297	8.07619	8.08243	8.12297	7.70299	7.9379	7.66546	7.54098	7.43112	7.89262	7.93116	7.96207	7.96573	8.11235	7.71709	8.03958	7.88476	7.36235	7.77559	7.09833	7.37623	7.43113	7.61015	7.58965	7.57966	7.45525	7.8256	7.19703	7.59064	7.46704	7.46256	7.3479	7.37797	7.20912	7.22233	7.97689	7.23371	7.92587	6.98097	7.53378	7.70319	7.57402	7.73783	7.43979	6.86971	7.3145	6.96769
ENSG00000006715	0.239544	6.78965	6.52182	6.60135	6.7136	6.90129	6.8849	6.63391	6.61034	6.89704	7.00833	6.89557	6.78379	6.44186	6.63707	6.28328	6.56314	6.5889	6.05181	7.26063	6.5679	6.07923	6.68742	6.28097	6.87608	5.99059	6.26917	6.83971	6.63214	6.24187	6.3379	6.05113	7.2834	6.17493	6.22498	6.20031	6.5668	6.15752	6.29228	6.78978	6.47936	6.31224	5.74356	5.57002	6.22674	6.8975	6.48792	6.37396	6.25995
ENSG00000006740	0.667199	6.19614	6.36652	6.5449	6.48342	6.22205	6.48306	6.38079	6.34817	6.29217	6.09722	6.4446	6.46733	6.73459	6.59891	6.55294	6.46846	6.30108	6.01377	6.83117	6.11873	5.99006	6.59265	6.20042	6.80372	7.19616	7.0894	6.16102	6.84424	5.96394	6.40707	6.12354	6.8455	6.3151	5.98506	5.98881	6.58087	6.04557	6.10238	6.6598	6.13586	5.90671	5.99581	6.37878	5.87386	6.28096	5.99648	6.03644	5.87257
ENSG00000006747	0.654633	4.89831	4.89456	4.96665	4.92	4.77274	5.23772	4.99586	4.88193	5.17112	5.02521	5.02659	4.99107	5.16999	4.95553	5.24551	4.82902	5.05465	5.17541	5.00887	5.0449	5.06263	4.99173	5.12619	5.18707	5.09781	5.67235	5.03331	5.05739	5.1678	5.16919	5.04818	4.92936	5.48335	5.14044	5.09539	5.14357	5.19031	5.02015	5.06937	5.04358	4.94794	4.81446	5.02588	4.88047	4.94575	5.24042	5.19821	4.93369
ENSG00000006756	0.739902	5.93542	6.24907	5.91111	6.03382	5.89166	5.93765	5.96904	6.09195	5.97237	5.92033	5.99051	5.88187	6.00075	6.01497	6.18573	5.95022	5.89244	5.80283	5.85077	5.8168	6.23112	5.90274	6.12197	5.72557	5.86387	5.92645	5.66249	5.87476	6.12599	5.97373	6.11353	5.7349	6.03417	6.17051	6.19513	5.81473	5.94083	6.11549	5.69288	5.80226	5.80977	6.09892	6.04097	5.86414	5.90349	6.09409	6.15752	5.75971
ENSG00000006757	0.681815	7.10942	6.69834	6.9299	7.00791	6.87142	6.86658	7.09692	6.96368	6.63607	6.69934	7.22447	7.05679	7.59915	7.65116	7.19686	8.12978	6.91268	7.41129	7.05536	6.42611	6.73623	7.081	7.12584	7.38536	6.75269	7.0266	6.9481	6.55668	6.95403	6.7773	7.17278	7.14237	6.67713	6.97962	6.92108	6.55693	6.88617	6.96404	7.36597	6.68194	6.71	7.41309	6.89705	6.44512	7.21332	6.69013	7.10936	6.58525
ENSG00000006788	0.225723	5.31133	5.37545	5.40913	5.51059	5.21036	5.67403	5.38085	5.83406	5.48259	5.53468	5.35731	5.35431	5.54254	5.68806	5.26504	5.47659	5.69071	5.47748	5.38103	5.24624	5.82485	5.20837	5.31781	5.50753	5.42784	5.4671	5.53556	5.4562	5.62171	5.49682	6.27419	5.47624	5.39614	5.43235	5.62857	5.25314	5.53402	5.65137	5.33475	5.4888	5.49317	6.39734	5.63544	5.26884	5.27579	5.51862	5.68014	5.12803
ENSG00000006831	0.978312	9.75761	9.67796	9.41826	9.84324	9.54556	9.73837	9.53532	9.50684	9.89733	9.81623	9.64116	9.4778	9.17086	9.36062	9.59514	9.20822	9.766	10.27	9.40645	9.36144	8.96704	9.68189	8.74604	9.86204	9.47734	9.32963	10.8917	8.77611	8.92406	8.35814	8.95821	9.60242	10.1932	8.55649	9.7524	9.54088	9.23884	9.48259	9.31411	8.75422	9.29631	9.40161	8.62307	9.64575	10.5347	8.84615	10.3646	9.30209
ENSG00000007038	0.438522	5.22493	5.5131	5.59797	5.69075	5.39322	5.40885	5.07044	5.6552	5.29057	5.40886	5.00344	5.31269	5.7729	5.40312	5.53653	6.72202	5.79753	6.25765	5.85392	5.99039	6.84856	6.00656	5.98796	5.84661	5.87237	6.11407	6.31558	6.05651	6.24408	6.18233	6.0294	6.14774	6.01952	6.14243	6.10976	6.16386	5.68047	6.41825	6.2869	6.15644	5.85253	6.12602	7.52469	5.54554	6.15419	5.82404	5.75319	9.53103
ENSG00000007047	0.710357	7.23314	7.35471	7.52005	7.46988	7.67452	7.64698	7.54628	7.18832	7.96788	7.82344	7.85376	7.53326	7.80496	7.69621	8.19086	7.88699	7.77925	7.66163	8.49368	7.54243	7.09549	8.46712	7.27684	8.61097	8.24589	7.17025	7.61207	8.6977	6.8506	8.18647	7.4195	8.51102	6.88365	7.20713	6.94502	6.98359	8.04795	7.12648	7.61212	6.78383	7.55125	7.59598	7.63872	7.87104	7.88461	6.8595	7.03663	8.69254
ENSG00000007062	0.537761	9.06801	8.12633	9.27707	8.55393	9.18885	8.79803	8.77863	8.12292	4.37528	4.755	7.7929	7.91832	7.38812	7.46972	8.70897	7.39396	7.0293	4.90218	5.20074	5.68537	5.11007	5.13421	8.77384	5.45159	5.09795	8.40961	5.55433	7.13727	5.31901	5.4333	5.23972	5.42297	6.25347	7.08131	4.85749	5.00689	4.94289	6.36519	5.18601	7.24701	5.30384	4.98756	6.40841	5.68079	5.43474	4.63972	7.62258	6.12668
ENSG00000007171	0.177488	5.32467	5.53936	5.65132	5.48463	5.32694	5.52349	5.40341	5.46856	5.42466	5.53581	5.6658	5.55369	5.38905	5.32347	5.60457	5.56252	5.78362	5.76188	5.40154	5.37229	5.81071	5.59215	5.55985	5.85165	5.68565	5.54386	5.46324	5.51492	5.54904	5.70295	5.61621	5.49347	5.91486	5.36494	5.61705	5.46141	5.64388	5.63771	5.53223	5.46848	5.37341	5.81347	5.54958	5.42748	5.35177	5.68633	5.45133	5.51026
ENSG00000007174	0.760161	5.67439	5.92687	6.11039	5.81865	5.80183	5.84528	5.92402	6.17634	5.7468	5.89592	5.99231	5.93769	5.80733	5.87151	5.97152	5.9342	6.175	6.07527	5.94284	6.04434	6.44935	6.03489	5.89209	5.99391	6.04598	5.94032	6.15822	6.09773	6.14871	6.19863	5.83343	5.78112	5.98824	5.7744	6.26466	6.08418	5.93474	6.1579	5.85063	6.08224	5.75175	6.16905	6.40442	5.95821	5.92295	6.1039	6.11486	6.25138
ENSG00000007202	0.819096	8.04462	8.30705	7.54705	8.17459	8.02926	7.95028	7.81894	7.94091	8.35289	8.18157	8.13591	8.06555	8.0065	8.05068	8.01367	7.95606	7.61422	8.12943	7.54197	7.85671	8.05399	7.91522	7.76924	7.3372	7.72108	7.49006	7.31554	8.08647	7.97193	7.90175	7.57018	7.49877	7.51197	8.38683	7.64038	7.6104	7.94599	7.74249	7.68792	7.66828	7.67673	8.07271	7.76027	7.69193	7.46226	7.86351	7.69232	7.72463
ENSG00000007237	0.834028	6.30727	6.50155	6.29894	6.51246	6.06474	6.34638	6.29575	6.51957	6.0202	6.19625	6.19277	6.15549	6.51418	6.44008	6.28855	6.54978	6.90519	7.07412	8.72504	7.3579	7.4548	8.47097	7.07284	8.39646	8.89373	7.03564	8.56471	8.97263	6.57678	7.55972	8.0066	8.63595	6.93076	6.62781	6.44675	7.21342	6.99273	6.61029	6.53418	6.95241	6.87129	7.07289	6.90642	7.48186	8.18701	7.7534	6.62698	7.40328
ENSG00000007255	0.717988	7.58183	8.07783	8.24101	8.63321	7.93016	8.15546	8.1294	8.04546	6.52606	6.63928	8.51843	8.22844	8.6644	8.83867	8.32887	8.54878	7.66494	8.01618	7.1389	7.42645	8.30279	7.45473	8.15347	7.35613	7.73055	7.69487	7.34011	7.18544	7.88958	8.42821	6.92561	7.03568	7.26042	7.62269	8.17947	7.38515	7.33135	7.3944	7.00613	7.71699	7.30837	7.13394	7.95149	7.82172	7.66138	7.77331	7.63022	7.20478
ENSG00000007314	0.251546	5.54866	6.00523	5.67847	5.7026	5.92553	6.09906	6.10148	6.05233	5.39356	5.76433	5.87929	5.77073	5.56768	5.94182	5.81452	5.65314	6.00006	6.38541	6.18648	5.70121	6.27933	5.96326	5.89256	6.10497	5.97303	5.8731	6.13906	6.00072	6.34127	6.43528	6.2648	5.90377	5.91215	6.17562	5.90408	5.82214	6.05474	6.27374	6.10319	5.87539	6.10404	9.13931	6.58913	5.951	6.16551	5.90143	5.6565	5.62157
ENSG00000007341	0.731775	5.83555	5.81658	6.19084	5.64607	5.65757	6.05175	5.7676	5.94542	6.06853	6.07962	5.95144	6.09522	6.02898	5.74001	6.16524	6.01145	6.14499	6.22357	6.3006	6.54274	6.55338	5.89473	6.25986	6.32421	6.51268	6.55743	6.55205	6.73348	6.76533	6.62879	6.26829	6.06359	6.28351	6.21593	6.52211	6.19717	6.50911	6.6528	5.99307	6.34721	6.39555	6.37414	6.33484	6.41228	6.39037	6.78899	6.0666	6.93738
ENSG00000007350	0.608938	5.08586	5.33323	5.27975	5.5675	5.04718	5.5319	5.25533	5.31434	5.12292	5.37363	5.18508	5.33237	5.55299	5.17868	5.23382	5.31241	6.16027	6.23204	5.74124	5.82068	6.41083	5.98332	5.63734	6.26487	5.83843	6.06218	5.86431	6.18046	5.86792	5.73937	6.83895	5.88318	6.01613	6.3537	6.41111	5.60763	5.98517	6.25508	6.23415	5.82385	5.79656	6.05255	6.4698	5.55634	6.02916	5.91762	5.91429	10.5659
ENSG00000007392	0.936946	8.90293	8.56276	8.70453	8.61238	8.66484	8.56218	8.70494	8.90022	7.91561	7.20901	9.03902	8.35314	8.35401	8.55159	9.06997	8.36461	8.4898	7.56037	7.44573	7.40442	7.28733	7.71176	7.22471	7.19289	7.9834	7.07328	6.94882	7.67234	7.09492	7.35801	7.20346	7.20733	6.97007	6.8015	7.12835	7.2243	7.1934	7.04461	7.51892	6.87629	7.15325	7.35348	7.06165	7.39797	7.34177	6.91794	7.20249	7.39195
ENSG00000007402	0.670537	7.50622	7.75292	7.19386	7.93963	7.56147	7.79085	7.30605	7.70411	6.47873	6.29798	7.42693	7.87656	8.00631	8.22332	7.90862	7.78678	7.3095	6.51345	7.27005	6.20392	6.7473	7.34627	6.77477	8.40205	8.91707	6.75195	6.98183	7.42282	6.50807	8.03585	6.57059	7.57041	6.82041	6.36817	6.43342	10.3093	6.94364	6.58712	7.79771	6.45585	6.34155	6.41175	7.28908	6.48103	7.40298	6.84345	7.00344	7.24182
ENSG00000007516	0.711804	6.35445	6.23652	6.61033	6.39456	6.04663	6.3735	6.15454	6.87654	6.00677	6.14459	6.13441	6.35975	6.26287	6.22521	6.34595	6.4634	6.8511	7.27101	8.32793	6.6925	7.06317	7.66304	6.78333	7.5678	6.85068	6.50379	7.37496	7.23525	6.67879	6.96069	7.05546	7.82061	7.00608	6.69284	6.88329	6.42909	6.73448	7.18248	9.29511	6.51472	6.87084	6.89615	7.33729	6.42789	7.28581	6.67584	6.9849	7.37398
ENSG00000007520	0.987664	6.61561	6.88923	6.89263	6.82951	6.60402	6.80386	6.76644	6.62578	7.06266	7.01327	6.75605	6.75851	6.65568	6.69076	7.03676	6.69724	6.70122	6.16672	6.17046	6.20997	6.23738	6.19665	6.01675	6.23733	6.63407	6.07145	6.1996	6.29235	6.38686	6.44123	6.2979	6.16283	6.10358	6.06369	5.9678	6.0679	6.15099	6.02084	5.90147	5.93722	6.11922	6.25749	6.53164	6.01156	6.20251	5.92183	5.99661	5.71628
ENSG00000007541	0.643352	6.39343	6.71447	6.57535	6.75581	6.32353	6.3219	6.40449	6.55642	6.35459	6.5104	6.70227	6.39206	6.44065	6.48115	6.78936	6.50864	6.78259	6.57885	6.37804	6.42744	6.93673	6.71923	6.62225	6.18425	6.57994	6.06779	6.05183	6.45628	7.14241	6.86635	6.46774	6.44896	6.37768	6.52617	6.62045	6.60251	6.68248	6.78142	6.42614	6.33275	6.48438	6.55548	6.4977	6.42758	6.41649	6.4755	6.35678	6.85034
ENSG00000007545	1.0307	8.01892	8.11099	8.20418	8.18592	8.16174	8.11741	8.0429	8.20911	7.57918	7.57347	8.17238	8.25493	7.97277	7.97709	8.17029	8.05329	8.21004	7.79607	7.28379	7.66151	7.56619	7.39457	7.72266	7.60011	7.57124	7.53597	7.9234	7.57574	7.86303	7.81314	7.81483	7.36527	7.70828	7.81686	7.53956	7.27109	7.83027	7.87378	7.62902	7.96914	7.59428	7.2379	7.92054	7.66835	8.20476	7.42444	7.60337	7.55358
ENSG00000007866	0.841168	6.2932	6.34779	6.52785	6.42237	6.45024	6.41338	6.49112	6.37369	6.39908	6.50108	6.37595	6.27887	6.0286	6.08161	6.53261	6.25535	6.19643	6.24787	5.81737	7.64679	6.27219	6.03025	6.56477	5.97764	6.03575	7.13743	5.6956	6.17138	6.0752	7.20935	6.66881	5.86428	7.2839	6.51645	6.69314	6.73769	7.31473	6.54019	5.85374	7.20594	7.34013	6.76747	6.76591	7.14124	5.85952	6.21905	6.31947	6.25788
ENSG00000007923	0.717378	8.79076	9.21056	9.48395	9.19202	9.30911	9.3115	9.47885	9.03752	8.31554	8.7246	9.18422	9.22136	9.24304	9.3735	9.27609	8.94754	8.43857	8.69979	8.68763	8.21684	8.39163	8.56415	8.44831	8.32152	8.91033	8.82993	8.17761	8.59344	8.32121	8.6193	8.50507	9.02003	8.44669	8.6796	8.55013	8.03331	8.62886	8.37997	8.01891	8.1444	8.13856	7.92992	7.5992	8.44568	8.56097	8.1674	8.32722	8.10336
ENSG00000007944	0.697551	7.15874	7.16289	6.76898	7.10509	6.8762	7.35917	7.00888	7.04423	6.06316	6.13414	7.13471	6.70299	8.40749	8.21704	7.58051	8.27879	7.22573	6.78909	6.51599	7.85104	7.82871	6.90692	8.13534	6.35683	6.88094	7.22824	7.22447	7.19754	7.19173	7.29401	5.97355	6.53087	6.85859	6.84917	6.61221	7.56017	7.4591	6.57465	6.3541	9.03793	7.05639	7.4246	6.8329	7.76618	6.02301	8.22578	6.65828	7.18177
ENSG00000007968	0.633801	5.54712	5.51502	5.64254	5.56413	5.60513	5.55747	5.5367	5.87117	5.5583	5.63997	5.75681	5.66012	5.43743	5.76508	5.74436	5.80401	5.81954	6.14514	6.29658	5.96833	7.18391	6.47365	6.13313	6.2577	6.20946	6.20373	5.98632	6.09458	6.8059	6.71421	6.49045	6.03621	6.58388	6.14713	6.39949	5.79204	6.15253	6.38002	5.81063	5.99858	6.07063	6.73428	6.17608	5.94224	5.95802	6.49595	5.90263	6.49791
ENSG00000008018	0.80024	9.65429	9.51937	9.57284	9.44063	9.59861	9.56774	9.66642	9.57819	9.50899	9.54862	9.41833	9.62453	9.69889	9.76163	9.364	9.75605	9.66134	8.55368	8.36033	8.7492	8.30128	8.27564	8.49272	8.24317	8.20613	8.68449	8.60609	8.28624	8.90766	7.88995	8.6418	8.28701	8.57298	8.69242	8.77465	9.00749	8.84301	8.50311	9.12845	9.33514	8.86358	8.82639	8.41899	8.70023	8.78884	8.67517	8.45224	8.70184
ENSG00000008056	0.687692	6.89501	7.08447	6.98943	7.00313	6.78069	7.22227	6.94591	7.01424	6.60107	6.5514	6.91129	6.5339	6.73975	6.85553	7.06761	6.85257	7.03108	8.09131	11.4234	7.37436	7.68735	10.8687	7.26719	10.0055	10.6166	7.57082	8.82379	10.1991	7.50374	7.71534	8.17686	11.1603	7.42223	7.75299	7.45395	7.52091	8.05427	7.74369	8.91847	7.14661	7.43238	7.83555	7.75818	7.21919	8.83383	7.51485	7.30715	7.37484
ENSG00000008083	0.811714	10.9703	11.0275	10.8364	11.1397	11.0411	11.1231	11.2444	11.3885	7.82801	7.74414	10.9592	11.1901	11.3462	11.5876	11.5429	11.6951	8.78765	7.78619	7.81812	7.75512	9.2976	8.11263	8.52331	8.04424	9.52091	7.784	8.16859	8.80218	8.56271	8.08723	7.79313	8.098	8.02509	7.33976	7.69439	8.3825	7.78851	7.83074	7.82751	8.13025	7.35106	7.40889	7.9656	8.56411	7.87364	8.49196	8.06794	9.3316
ENSG00000008086	0.729575	5.35579	5.34329	5.53089	5.45524	5.32729	5.24226	5.32793	5.66714	5.44334	5.35649	5.37871	5.30568	5.38211	5.31244	5.30885	5.28837	5.5086	5.68838	5.5822	5.57045	6.0595	5.59632	5.4948	5.94131	5.61859	5.52497	5.48937	5.66816	5.73488	5.79079	6.16297	5.476	5.9298	5.69915	5.78542	5.63461	5.56641	5.98487	5.62692	5.46348	5.4913	5.99317	5.84927	5.42877	5.60797	5.76899	5.59488	5.95732
ENSG00000008130	0.85965	6.55961	6.6491	6.61662	6.6297	6.61162	6.49495	6.76947	6.87431	7.01428	7.00373	6.74822	6.72264	6.70644	6.84637	6.85056	7.04549	6.53318	7.77328	6.45471	6.82314	8.02301	6.77942	6.91217	6.69243	6.67077	7.22401	6.42035	6.86389	7.18988	7.06855	6.64361	6.49495	6.85353	6.95905	7.51	6.83409	7.02865	7.09004	6.42627	7.06777	6.81205	6.63985	7.35157	6.97817	6.61272	7.68994	7.05762	7.12411
ENSG00000008196	0.329202	4.87429	4.79413	4.61476	4.85116	4.6971	4.69184	4.72419	4.85249	4.62753	4.66429	4.76247	5.12125	4.70167	4.68114	4.69818	4.62385	6.10153	4.92452	4.62358	4.68311	4.75113	4.70839	6.42677	4.61223	5.32933	4.77021	4.58683	4.66853	4.76044	4.6868	4.88068	4.69563	4.72494	5.50041	4.7946	4.59999	4.86238	4.7465	4.63741	4.74525	4.64912	4.78775	5.93232	5.11983	4.70983	4.69554	4.82826	4.87335
ENSG00000008226	0.411096	6.44551	6.66389	6.85216	6.65813	6.65797	6.60269	6.62974	6.78193	6.61415	6.79382	6.64532	6.65936	6.64274	6.56062	6.79202	6.59228	6.84081	7.38929	7.14042	6.88189	7.33874	7.08062	6.93995	7.4004	6.94307	7.08514	7.28059	7.24011	7.32378	7.27061	7.41801	7.22163	7.26022	7.201	7.36927	7.31576	7.06971	7.13201	7.65735	7.02614	6.89756	7.20402	7.62865	6.90102	7.20478	6.91434	7.11973	7.48577
ENSG00000008256	0.6356	5.49259	5.3657	5.53866	5.52835	5.44129	5.42124	5.50315	5.53734	5.73412	5.46422	5.44628	5.55281	5.4738	5.523	5.53947	5.6575	5.5155	5.58032	5.25784	5.29762	5.55393	5.56618	5.54602	5.37819	5.23448	5.23044	5.36623	5.55138	5.18604	5.3838	5.5939	5.1843	5.39124	5.61781	4.99724	4.98182	5.51923	5.42127	5.12775	6.16176	5.29339	5.52685	5.68412	5.45053	5.33382	5.34463	5.42923	6.22573
ENSG00000008277	0.799155	5.53654	5.58429	5.37526	5.5857	5.42608	5.55221	5.50626	5.56447	5.43388	5.40587	5.4305	5.6044	5.49217	5.43891	5.48289	5.49803	5.69464	6.02298	6.35697	5.8764	5.9672	6.42428	5.91421	6.27361	6.52135	5.85542	6.26669	6.24424	5.87575	6.04808	5.93972	6.39386	5.82603	5.96415	5.97049	5.6818	6.00108	5.78977	5.86793	5.76522	5.68287	5.80776	5.91137	5.72118	6.29075	5.93238	5.94816	5.80014
ENSG00000008282	0.802661	8.53973	8.07134	7.73113	8.40462	8.27531	8.62693	8.17325	7.96738	8.69283	8.72496	8.29391	8.30223	8.31668	8.37914	7.18608	8.78461	7.98183	8.66452	7.70522	9.44839	8.30039	7.79769	9.44731	8.10131	7.15	9.12658	9.36684	7.86429	7.85917	8.32318	8.42476	7.90025	8.41728	9.27014	8.18437	8.91819	9.64006	8.75415	7.82542	9.39357	9.23131	9.96942	9.29886	9.65401	9.54353	9.23103	9.15275	10.2977
ENSG00000008283	0.740909	6.80341	7.14595	7.08012	7.02097	6.94492	6.90169	6.98525	7.08235	7.06264	7.29609	7.09649	6.96532	6.86463	6.79581	7.354	6.92869	6.6915	8.30459	7.72844	7.32483	7.22487	7.59956	7.90432	7.50368	7.38308	7.29255	7.20311	7.71269	6.87407	7.59284	7.38712	7.66506	7.522	7.49834	7.01311	7.47471	7.29562	7.69276	8.22217	7.14941	7.64126	7.02956	7.7452	7.62949	7.16801	7.05166	7.47699	6.90243
ENSG00000008294	0.886406	6.02043	5.80829	5.71608	6.02464	5.82845	5.98577	5.81097	5.8051	6.2199	6.12995	6.04663	6.14059	6.07823	5.83153	6.03508	5.97286	6.40258	5.59218	6.77198	6.20971	5.52879	6.04486	5.97751	6.51407	5.82984	5.85868	7.40079	6.36827	5.51457	5.7613	5.85067	6.74862	5.69	6.21182	5.96444	6.06073	6.29407	6.09564	6.24705	6.21089	6.144	7.15815	5.5911	6.34478	6.76351	5.56407	5.76882	7.40764
ENSG00000008300	0.141045	6.84888	7.16076	7.00242	7.11709	6.99087	6.92475	7.09489	6.97863	6.62576	6.47422	7.14003	6.94733	6.96312	6.9574	7.50546	6.91477	6.73455	6.47248	6.63962	5.76869	6.6777	6.60298	5.90263	6.69463	7.04107	6.59906	6.23524	7.00279	6.40843	6.22342	6.32036	6.53752	6.58979	6.32516	6.21827	6.15042	6.02983	6.26693	6.84538	6.07201	5.83066	6.30787	6.49984	6.08622	6.35502	6.37951	6.61394	6.67185
ENSG00000008311	0.710735	9.09955	8.41466	8.84296	8.68677	8.93906	8.83058	9.12102	8.95608	4.97212	5.01523	8.65473	8.88836	9.10921	9.22787	8.76637	9.62339	5.2145	4.90816	4.98319	5.3224	4.83142	4.78603	5.0562	5.19621	4.79655	5.01216	5.3806	4.5653	4.86414	4.98559	5.22654	5.15169	4.79173	5.52631	5.44761	5.00655	5.14249	5.01746	5.31963	4.80873	5.07159	4.96691	4.95584	5.02527	5.2272	4.9533	5.09571	4.88251
ENSG00000008324	0.649892	10.6961	10.5721	10.4619	10.58	10.6908	10.8405	10.4167	10.5468	9.1336	9.34255	10.7751	10.9333	10.2693	10.7292	10.431	10.3985	9.93353	7.6993	8.38312	8.03361	8.17793	8.68905	8.32952	8.4005	8.522	7.74581	8.56492	8.50608	8.45441	7.41391	7.17611	8.61414	8.46527	7.38423	7.58765	8.1934	8.20978	7.93072	8.32456	7.92	8.42024	7.46698	7.6627	8.2677	8.21494	8.14029	8.75188	7.33595
ENSG00000008441	0.757837	5.08818	5.57985	5.25732	5.42545	4.90787	5.41412	5.03327	5.57878	5.59008	5.77266	5.10759	5.50522	5.49689	5.2698	5.27166	5.39162	5.63253	5.40471	5.66816	5.49749	6.52056	5.52764	5.60741	5.67758	5.71551	5.67003	5.95583	6.17185	5.64666	5.96409	5.51403	5.94567	5.66125	5.37574	5.66392	5.31798	5.78419	5.7258	5.35705	5.36663	5.41562	6.05749	6.06022	5.6563	5.7012	5.61951	5.38701	5.42748
ENSG00000008513	0.715958	5.1318	5.49189	5.12472	5.30343	5.2881	4.94864	5.05044	5.49876	5.47547	5.39011	4.89001	5.27218	5.02419	5.1542	5.46927	5.24022	5.15297	5.7387	5.06337	5.36103	5.8273	4.9309	5.11657	5.02026	5.19757	5.05374	5.07725	5.41611	5.73859	5.65376	5.6892	5.28756	5.0202	5.25482	5.29084	5.43395	5.44822	5.29611	5.05425	5.04237	4.91922	5.00836	5.88517	5.14283	4.80436	5.434	5.46136	4.60365
ENSG00000008516	0.709878	7.11116	6.86364	7.06307	7.04671	6.81453	6.86849	6.78944	7.06468	6.86804	6.72469	7.0072	6.79442	6.97933	6.84501	7.03197	6.92531	7.0677	7.33249	6.7331	6.89465	7.69922	6.75996	6.66605	6.94706	6.9036	7.08756	6.7126	7.15099	7.03509	7.12695	7.21556	6.86832	7.03932	6.99531	6.92762	6.91574	6.77239	7.09017	6.81728	6.88281	6.78733	6.86103	7.56107	6.85467	6.88715	7.42964	6.9721	6.69525
ENSG00000008735	0.906474	6.31172	6.52451	6.45941	6.4645	6.38077	6.56198	6.34388	6.74982	6.36724	6.43978	6.23849	6.40705	6.40317	6.57412	6.60472	6.31778	6.62163	6.73472	7.7834	5.95501	6.53643	7.68891	6.01311	7.20717	7.32772	5.97269	6.62501	7.57523	5.97377	6.16387	6.28537	7.61266	6.18659	6.09773	6.22132	6.02848	6.32632	6.27251	6.93284	5.75889	5.95691	6.23497	6.7056	6.10782	6.85598	5.9818	6.37121	6.19988
ENSG00000008853	0.784437	6.81055	6.62144	7.12599	6.67773	6.56292	6.5929	6.6202	6.64798	7.11206	6.98882	6.99535	6.83638	6.95782	6.59245	6.96073	6.75913	7.59307	7.8151	8.30504	7.65081	7.85556	8.66124	7.21984	8.38298	8.05694	7.53058	7.25013	9.08338	7.55088	7.99119	8.21789	8.08724	7.2431	7.43453	7.78257	8.54901	7.73528	7.84912	7.53285	7.36884	7.44435	8.24656	7.52189	7.30824	7.48548	7.61595	7.51457	7.31332
ENSG00000008952	0.679985	9.1167	8.45437	8.81138	8.54598	8.98463	8.87959	8.83979	8.44295	9.37546	9.09956	9.08912	8.8751	8.68021	8.70616	8.77081	8.55311	8.11201	6.53961	8.8375	9.39791	6.76408	8.2442	8.72408	8.5936	8.22527	8.65555	9.26739	6.32426	8.71069	7.15746	7.70576	8.80401	8.32095	8.63517	8.69493	9.04718	9.0591	8.5821	8.85848	9.0051	8.98389	8.26204	7.24085	8.43518	8.69754	8.64693	9.2147	8.15018
ENSG00000008988	0.730091	9.126	8.95703	9.25065	8.97729	9.14465	9.04806	8.99469	9.16997	8.91401	8.74693	9.04062	9.00735	8.98095	9.02703	9.32098	9.01141	8.93608	8.77003	8.54422	9.09611	8.91836	8.56172	9.09172	8.63695	8.35775	8.70737	8.87322	9.25522	8.97243	8.87	8.61583	8.65845	8.55008	8.68349	8.46741	8.73461	9.21317	8.56868	9.08604	8.89695	8.90842	8.81422	9.01441	9.0184	8.91294	8.84961	8.81906	8.70243
ENSG00000009307	0.561995	10.3388	9.71127	10.3316	9.70236	10.3389	9.85429	9.95882	9.91632	9.9672	9.87118	9.98728	9.98418	9.84725	9.78823	9.89694	9.75966	9.68377	8.67604	9.63928	10.7952	8.24702	9.23864	10.2882	9.58838	8.79942	10.0974	9.71772	9.35151	9.47823	8.75476	10.2012	9.81892	9.33885	9.48447	8.96698	10.0107	10.0664	9.5895	9.83156	9.40032	10.6689	11.7877	8.22232	10.2729	9.67973	9.53913	9.87148	10.4098
ENSG00000009413	0.903582	6.87046	6.3815	6.10615	6.25338	6.35927	6.31977	6.07044	6.02653	8.18007	8.44624	6.46546	6.46033	6.08258	6.14489	6.14564	6.00862	6.76141	5.45096	6.86295	7.69569	5.3563	5.9616	7.32553	7.0215	6.92725	7.30352	6.76948	6.2329	6.01802	7.01766	6.32512	7.2417	6.5232	6.10416	6.50366	7.77741	7.1997	6.7051	8.03289	6.72278	8.13628	6.89886	5.35439	7.33265	6.81716	6.44682	6.61567	7.43268
ENSG00000009724	0.247409	5.92348	5.85626	5.94769	5.93286	5.74658	5.68228	5.74589	5.93143	5.71831	5.99516	5.84682	5.73811	6.00508	5.70905	5.88567	5.89577	5.97668	6.50567	6.20873	6.26297	6.60348	6.59228	6.2412	6.14963	6.30085	6.28761	6.30052	6.25391	6.79373	6.31188	6.24094	6.28579	6.24298	6.41241	8.06243	6.12778	6.50147	6.46599	6.1258	6.13831	6.17335	6.33797	6.61088	6.26642	6.16386	6.4839	6.38003	6.26502
ENSG00000009780	0.695288	5.67143	5.96652	5.9374	6.09699	5.74643	6.01079	5.85714	6.01068	5.78498	6.04291	5.71625	5.7942	5.66536	5.8345	5.77683	5.83629	6.50195	6.26526	5.96573	6.03379	6.1966	6.40119	6.10761	6.31549	6.34931	6.07429	6.06934	6.24133	6.20932	6.42202	6.17192	6.02688	6.18416	6.58958	6.49457	6.01812	6.177	6.93565	6.04241	6.14024	6.32895	6.59462	6.35653	6.35953	6.2542	6.07967	6.37038	6.66631
ENSG00000009790	0.131375	5.08236	5.08724	5.05045	4.96821	4.93455	5.12528	4.92101	5.23906	4.70189	5.23409	5.14842	5.06461	5.27177	5.05461	5.11177	5.10493	5.15778	5.44756	5.28802	5.51018	6.48626	5.30543	5.57866	5.48168	5.51835	5.58204	5.31554	5.4532	5.95813	5.45865	5.44729	5.22937	6.06104	5.58107	5.84173	5.6684	5.65359	5.86811	5.49815	5.30006	5.25098	5.44934	5.85061	5.47249	5.47978	6.62442	5.48552	5.3705
ENSG00000009830	0.758126	6.74271	7.03701	7.27537	6.87151	6.98725	6.92499	6.86861	6.97913	7.24222	6.92601	6.93287	7.0268	7.15359	7.03022	7.33466	6.97986	6.60695	7.24959	6.91722	6.85872	7.38309	6.98904	6.8812	7.12704	7.17335	7.10563	7.27095	7.0537	7.30797	7.0239	6.84508	6.87791	6.99044	6.97423	6.9048	6.83088	7.0328	6.83985	7.17098	6.8928	6.94592	6.96498	7.1689	6.82012	6.88319	6.80397	6.87159	7.26598
ENSG00000009950	0.550097	7.45802	7.58226	7.27649	7.34217	7.28527	7.17667	7.22397	7.78485	6.88184	7.23575	6.90426	7.00111	7.28436	7.09589	7.82718	7.08966	7.50774	8.10913	7.3717	7.09893	7.59908	7.31475	6.31204	7.26711	7.38214	6.69105	7.25292	7.05632	7.70792	7.43267	7.39507	7.01322	7.81613	7.13273	8.70504	6.82332	6.62291	7.11165	7.0077	7.0492	6.66427	7.14767	7.59476	7.04053	7.34983	6.62133	6.9592	7.17362
ENSG00000009954	0.856933	7.20667	7.46048	7.44493	7.42603	7.39323	7.44585	7.36071	7.30778	7.12671	7.11343	7.26707	7.27864	7.22559	7.29868	7.59115	7.24073	7.34701	7.17952	6.63693	6.64361	6.84047	6.66917	6.55628	6.78133	6.91237	6.81322	6.80965	6.88903	7.06939	6.63891	6.89594	6.67717	6.87442	6.56449	6.68419	6.77774	7.25711	6.4963	6.90443	6.39649	6.77099	7.05554	7.12907	6.5992	6.66657	6.79549	6.64742	6.70884
ENSG00000010165	0.779764	8.21557	8.29951	8.32525	8.30781	8.40837	8.50672	8.3626	8.66472	8.54921	8.34921	8.31433	8.15745	8.05447	8.18991	8.35416	8.0499	7.40354	7.54059	7.34912	7.55753	7.70849	7.66019	7.45928	7.28117	8.02622	7.57725	7.27515	7.60622	8.0507	7.51361	7.30612	7.46448	7.3764	7.36204	7.14244	7.36475	7.37888	7.5383	7.06141	7.3896	7.78394	7.29705	7.68086	7.3592	7.40123	7.49937	7.45101	7.79635
ENSG00000010219	0.117641	7.33073	7.35402	7.9449	7.72802	7.45418	7.53766	7.7921	7.55778	8.82577	8.96883	7.89322	7.54061	7.73563	7.83243	8.11938	7.87992	8.31677	7.91001	7.70836	7.93097	7.93901	7.79481	7.71572	7.79948	8.0104	7.61916	8.08278	7.60262	8.06964	7.58113	7.99928	7.80811	7.64202	7.69731	7.50808	8.27728	7.93741	7.48661	8.34975	7.19809	7.87935	7.59063	7.74416	7.39719	7.92508	7.64899	7.4974	9.13388
ENSG00000010244	0.77119	10.8221	10.4368	10.5899	10.8081	10.7919	11.0859	10.6242	10.7123	10.0021	10.0054	10.7675	10.8702	10.6657	10.7988	10.7567	10.6949	10.722	9.31752	9.19878	9.31695	9.55364	9.08263	9.30417	9.09325	8.68051	9.4938	9.31178	9.34246	9.64954	9.57288	9.13589	9.18048	9.10554	9.51583	9.17317	9.50666	9.31391	9.4568	9.62008	9.97216	9.67413	9.26445	8.86148	9.83931	9.4786	9.7275	9.11036	10.0683
ENSG00000010256	0.803591	9.91007	10.5459	10.5073	10.786	10.4736	10.6523	10.8757	10.7267	10.3266	10.6687	10.7354	10.5969	10.4655	10.5461	10.5393	10.5444	10.0239	9.39127	9.19175	9.29164	9.45217	10.3447	9.05625	9.22481	10.4053	10.4221	8.83193	9.50459	9.93215	9.82395	11.5693	9.45458	10.2059	10.2719	9.96191	9.14554	9.03894	8.92639	9.21054	9.42424	9.75168	10.6766	9.31368	9.59617	9.0873	9.00319	9.83145	9.92346
ENSG00000010278	0.689765	10.0652	9.4364	9.32635	9.67644	9.76553	9.64996	9.78942	9.42554	10.4771	9.88931	9.52424	9.82001	10.0447	10.4713	9.01019	10.4957	9.06632	10.0906	9.52662	10.8412	7.28699	9.9273	10.8617	9.79634	8.39058	11.5163	11.3281	7.86484	6.5681	8.88544	8.05655	9.77978	8.95447	9.93397	7.38319	11.8176	8.50784	8.35814	9.23971	9.53717	10.541	7.20633	10.8596	11.4888	11.2451	8.24267	9.01806	7.54814
ENSG00000010318	0.825835	5.91562	5.8722	5.94082	5.86757	5.90652	5.69287	5.75651	5.93579	5.8944	5.95024	5.84601	5.83952	5.82166	5.85598	6.05286	5.81207	5.89235	6.21068	5.95078	6.06967	6.33452	6.09937	6.07617	5.81713	6.08623	6.16355	6.00088	6.12465	6.13865	6.18216	6.08418	5.85363	5.98901	6.0897	5.94015	6.02904	5.9947	6.18972	5.99679	6.16318	5.86529	5.94044	6.54749	5.95629	5.95444	6.04052	6.04101	10.2173
ENSG00000010319	0.187231	5.78998	6.05035	6.009	5.88725	5.8812	5.72456	5.89261	5.82453	5.54557	5.71989	5.8184	5.63791	5.77786	5.76192	5.9962	5.69872	5.90394	6.64753	6.68944	6.61521	6.20204	6.31311	7.15617	7.29089	7.30166	6.64851	6.61675	6.30269	6.34899	6.74722	7.28514	6.67888	6.44795	7.06872	6.1277	6.65745	6.44922	6.88853	6.54932	6.96819	6.48851	7.09448	8.18281	7.18372	6.84977	6.67398	6.43322	6.09797
ENSG00000010322	0.63392	9.69428	9.85631	9.65254	9.84133	9.905	9.70127	9.77528	9.50687	9.98001	9.72509	10.0173	9.81637	9.38261	9.45241	10.0652	9.65585	9.88461	9.98004	11.0386	9.93506	9.35571	10.5447	10.3161	10.5988	11.5638	9.57441	10.0779	10.5092	9.23578	10.6111	8.92737	10.9536	9.25529	8.71031	8.85266	9.62091	10.5369	8.82054	11.5482	9.30829	9.10559	8.15852	9.38099	10.2323	10.3652	9.10124	9.27484	10.8749
ENSG00000010327	0.316158	6.56667	6.61249	6.79959	6.60468	6.44876	6.64358	6.49468	6.88378	6.57005	6.54577	6.61374	6.54315	6.82604	6.47214	6.73521	6.66139	7.02765	9.13768	7.70697	9.13189	8.0777	7.526	8.08131	7.55434	7.34682	8.71532	7.78085	7.94706	8.55893	8.53587	8.41333	7.616	8.93618	8.22172	8.948	9.24657	8.23612	8.61464	7.80703	8.37383	8.16878	7.5931	7.74434	7.93153	8.101	10.1791	7.85804	7.726
ENSG00000010361	0.665345	6.88016	6.90368	7.00092	6.65276	6.53965	6.44041	6.69538	6.81884	6.2079	6.2293	6.50694	6.90791	6.76258	7.1328	7.08773	6.77836	7.25883	7.1895	6.5419	6.38047	6.89177	7.02703	6.81404	6.5	6.86226	6.33542	6.58705	6.8059	6.71603	7.37149	6.95078	6.258	6.23396	6.8889	6.74238	6.44404	6.44615	6.53837	6.4358	6.22766	6.56231	6.98543	7.21512	6.40462	6.70835	6.46849	6.53261	7.80904
ENSG00000010379	0.361652	7.23106	7.68788	7.4483	7.4525	6.98021	7.31328	7.43718	7.53837	7.12937	7.51888	7.27265	7.16719	7.25592	7.05231	7.35557	7.462	7.52553	8.37774	8.51738	7.88743	8.77596	7.97746	7.81474	8.31768	7.95354	8.13777	8.02387	8.22473	8.5991	7.93237	7.83445	8.29475	8.61695	8.757	8.40099	8.07089	8.06355	8.06976	7.73022	7.93661	7.83127	8.17845	8.43281	7.5216	8.35974	8.38335	8.36154	7.9978
ENSG00000010539	0.557241	6.36881	6.16875	6.29908	6.15266	7.0723	6.64723	6.6326	6.06202	6.49294	6.19444	6.51567	6.53351	6.88817	6.85474	6.22599	6.85375	6.16221	5.56076	5.50462	5.66911	5.58277	5.58875	5.77014	5.82281	5.81405	5.83879	5.428	5.81104	5.74376	5.44596	5.71305	5.46398	5.7161	5.41151	5.62933	5.77362	5.71251	5.49491	5.69346	6.03094	5.57913	5.49506	5.38849	5.48182	5.26538	5.90061	5.54556	6.95236
ENSG00000010610	0.236716	5.92828	6.14903	6.00887	6.24582	5.81272	6.23284	5.77571	6.24296	6.14793	6.29105	5.81984	6.11849	6.21221	6.02652	5.96301	6.16797	6.4794	6.7713	6.4722	6.54839	6.97809	6.63836	6.46938	6.50037	6.51221	6.73178	6.54747	6.47748	7.03608	7.1821	6.70227	6.34405	7.02346	6.69741	7.01117	6.98666	6.46919	6.69095	6.45575	6.53512	6.48007	6.66452	6.889	6.61874	6.59858	7.26047	6.65183	6.61086
ENSG00000010626	0.457362	6.11049	6.35323	6.35732	6.338	6.15981	6.28596	6.34779	6.44477	6.489	6.47947	6.40222	6.23577	6.39527	6.3478	6.39582	6.17718	6.15276	6.94171	6.68863	6.2361	6.79199	6.6557	6.13497	6.75567	6.74776	6.46582	6.62035	6.77165	6.46216	6.88657	6.69388	6.51897	6.61316	6.8489	6.54529	6.43489	6.65596	6.38764	6.7121	6.33692	6.20747	6.68872	6.5523	6.15281	6.83665	6.54841	6.33929	7.07401
ENSG00000010704	0.263048	6.05711	6.20045	6.15395	6.24559	5.90967	6.07285	6.02964	6.15536	6.51027	6.60072	5.97215	6.09161	6.29377	5.99539	6.18718	6.13901	6.41307	7.29098	6.6581	6.88033	6.96546	6.69665	6.98381	6.58138	6.65983	6.97985	6.61449	6.77753	6.80766	6.90754	6.94823	6.47293	6.99154	6.88331	7.12812	6.85461	6.72761	6.79002	6.63673	6.84977	6.65227	6.85548	7.10824	6.77221	6.69068	7.12451	6.79147	6.5404
ENSG00000010803	0.221016	6.51517	6.5434	6.42021	6.41298	6.58793	6.70686	6.4938	6.74682	6.77993	7.07948	6.7322	6.53744	6.77525	6.54981	6.71702	6.48455	7.52496	7.71473	7.47425	8.11093	7.33938	7.54225	7.85659	7.20895	7.34214	7.59358	6.82462	7.94343	7.15063	8.06611	8.08526	7.41025	7.5938	7.82983	7.55811	7.13379	7.92069	7.99215	7.90839	6.86346	7.99891	7.8768	8.20007	7.1081	7.42114	7.10519	7.51158	8.27606
ENSG00000010810	0.84234	7.58025	7.59646	7.58731	7.60774	7.93358	7.66465	7.94632	7.58636	6.71335	6.84521	7.89582	7.8148	7.29276	7.51267	7.69681	7.2391	8.1016	6.469	8.69529	7.56198	6.98847	8.07056	6.62597	8.18572	8.60543	6.63875	8.61173	9.11247	6.48222	7.42143	6.88284	8.66091	7.00818	6.52462	6.98892	7.23709	6.96098	7.11902	6.91836	6.82826	6.87296	6.39336	6.00811	6.92952	8.85458	7.84079	6.79711	6.74079
ENSG00000010818	0.154069	6.51467	6.24743	6.43607	6.23933	6.34242	6.59389	6.36404	6.4157	7.15876	6.99157	6.17118	6.18894	6.33951	6.4003	6.57711	6.93338	6.47186	6.31972	7.59476	6.53302	6.14974	8.36756	6.66544	7.60234	7.94482	6.17348	6.53005	8.93099	5.62653	6.16239	6.43624	7.86822	6.24887	6.19768	6.32773	6.71401	7.14797	6.49933	6.61421	6.57403	6.73566	6.80456	6.46082	6.89783	6.57642	6.34221	6.2081	6.12359
ENSG00000010932	0.228683	5.09147	5.60641	5.36625	5.66806	4.96029	5.6215	5.20795	5.5479	5.36324	5.3998	5.35606	5.65419	5.99228	5.1869	4.98148	5.3324	7.98087	6.44062	6.15022	6.55313	6.07017	6.19025	7.32002	6.2788	6.33105	6.17246	6.2175	6.38031	8.4606	6.27945	6.54628	6.1493	6.76051	7.55337	6.52992	6.25822	7.47594	6.2981	6.81467	6.12097	6.06249	6.5759	6.43691	6.69059	6.04067	6.07018	6.1028	6.05022
ENSG00000011007	0.821705	7.65946	7.57387	7.58435	7.77809	7.92218	7.44777	7.87326	7.84127	7.51026	7.53371	7.8356	7.32653	7.30687	7.37483	7.55276	7.49937	7.13287	7.62394	7.33124	7.37538	7.51455	7.45795	7.15207	7.3948	7.31244	7.56584	7.18569	7.36429	7.59739	7.45531	7.85043	7.28125	7.44352	7.59734	7.61938	7.21134	7.15845	7.73148	7.41215	7.1648	7.44082	7.72008	7.8491	7.48722	7.28033	7.42982	7.76058	7.41778
ENSG00000011009	0.552184	10.0142	9.88384	10.0033	10.5136	10.3377	10.3491	10.5254	10.1556	9.866	9.44046	10.5815	10.0038	9.99684	9.83843	10.829	9.9802	9.57329	9.55715	8.95028	8.96019	9.48887	9.26343	9.2242	9.35053	9.45761	9.43405	9.00444	9.39472	9.54363	9.93764	8.93842	9.00985	9.4504	9.56532	9.35257	9.25715	9.11755	9.24345	9.11603	9.18937	9.22745	8.83393	9.42428	9.30343	8.87167	9.5042	9.56132	8.99885
ENSG00000011028	0.584073	7.9121	8.37398	7.99373	7.64791	8.04877	7.92682	8.11683	8.08871	8.99719	8.85941	7.88306	7.93108	7.80448	7.70329	8.24881	7.94284	8.11241	7.79078	7.47247	8.0481	8.03427	7.39366	7.9378	7.41954	7.45454	7.48625	7.6533	7.60079	8.21539	8.47355	7.95998	7.39176	7.34677	7.57032	7.38074	8.21659	8.03679	7.57379	7.54819	7.19143	7.50467	7.60242	7.80688	7.94552	7.75753	7.5029	7.60633	7.37103
ENSG00000011105	0.751689	7.15254	7.09004	7.25308	7.05253	7.12324	7.26465	7.12899	7.12752	7.21302	7.36411	7.04796	7.13684	7.10955	7.04383	7.01683	7.03428	7.07909	7.08194	6.55991	7.0509	7.26519	6.9047	7.19451	6.84637	7.92653	6.71131	6.84121	7.0366	7.22699	8.01178	7.69526	6.72579	6.55667	7.43116	7.34718	6.97827	7.42374	6.77089	6.63174	7.57343	7.02784	6.60038	7.02494	7.28152	6.71447	6.96771	6.65157	6.66284
ENSG00000011114	0.893261	5.49578	5.2338	5.35092	5.33125	5.35959	5.46658	5.3671	5.22735	5.14119	5.03833	5.29126	5.22857	5.14957	5.43912	5.37429	5.45708	5.06686	5.18922	4.99134	5.03339	5.18063	5.05094	5.05303	5.21913	5.05779	5.23714	5.11395	4.94055	5.16264	5.06367	5.21773	5.03404	5.28638	5.35369	5.19253	5.08077	4.94691	5.11501	5.05031	5.19694	4.99572	5.20485	5.42913	5.01852	5.03558	5.09195	5.03994	5.40687
ENSG00000011143	0.779744	6.85205	6.70553	6.9434	6.86083	6.86388	6.73293	6.84887	6.69282	6.8631	6.7909	7.08467	6.95753	6.77523	6.75231	6.81484	6.50502	6.86935	7.55121	7.21317	7.24429	7.92907	7.15304	7.28434	7.5275	7.43424	7.43788	7.34135	7.53604	7.7443	7.89464	7.75912	7.08548	7.16847	7.33558	7.10904	7.10845	7.22006	7.27519	7.6533	7.30236	7.39528	7.50291	7.90304	7.63992	7.12244	7.59825	7.30662	7.66294
ENSG00000011198	0.865898	5.95378	5.47158	5.5335	5.44112	5.74881	5.80768	5.77245	5.72653	6.65337	6.5312	5.85973	5.59995	5.35771	5.44825	5.62435	5.26429	5.18915	5.53433	5.40247	5.43683	5.86338	5.31774	5.70977	5.50851	5.26605	5.62038	5.80729	5.29322	5.79113	5.26406	5.99176	5.43589	5.60568	5.70033	5.67213	5.92586	5.33572	6.27172	5.33939	5.85893	6.02686	5.77853	5.58354	7.18132	5.97208	5.59518	5.55021	5.75016
ENSG00000011201	0.618027	9.80343	9.68183	9.34112	9.38035	9.79905	10.2188	9.37295	9.5605	5.67958	5.96401	9.66564	10.1125	9.59256	9.63154	8.39788	9.27886	8.03315	5.80071	8.62478	6.61836	5.77019	7.71088	7.45856	8.7453	6.7212	5.68911	8.24693	7.32776	6.25546	8.1019	6.71697	8.36885	6.18772	6.17119	6.37744	9.45777	6.02459	6.45452	6.43365	6.55645	6.86351	8.06669	5.93106	7.06742	9.54049	6.36392	6.19181	7.48509
ENSG00000011243	0.660286	6.65052	6.41341	6.88286	6.19179	6.47132	6.20354	6.56389	6.2329	6.57337	6.00551	6.65954	6.18633	6.25056	6.46852	7.16642	6.25936	6.61709	6.65008	6.61585	6.06776	6.81766	6.37398	6.29826	6.2877	6.8403	6.02466	6.47452	6.49553	6.70909	6.46478	6.30702	6.48771	6.19391	5.99124	6.16384	5.97643	6.61616	6.10622	6.64063	6.0099	6.17377	6.37108	6.45361	6.31555	6.41392	6.11272	6.1701	6.43525
ENSG00000011260	0.713131	7.59659	7.55979	7.47515	7.55571	7.45781	7.69448	7.47682	7.63715	6.70623	6.4445	7.66447	7.61233	7.63963	7.61712	7.59592	7.72247	6.97445	6.29184	6.47337	6.41844	6.28847	6.54167	6.40064	6.45412	6.40841	6.19932	6.43802	6.45908	6.47563	5.70595	6.04075	6.61939	6.02471	6.45477	6.42848	6.54176	6.92476	6.50615	6.88878	7.20156	6.61552	6.46949	6.14275	6.72396	6.44904	6.79708	6.16317	7.54776
ENSG00000011295	0.880536	9.60428	9.06216	9.41035	9.03915	9.97066	9.32095	9.87065	9.36439	8.16933	8.19848	9.56494	9.87259	9.69964	9.94563	9.61463	9.92409	8.79598	8.40473	9.38267	8.19046	7.58785	9.05376	9.29294	8.68304	9.20839	8.71328	8.6565	8.47932	7.8573	7.83881	8.27751	9.59247	9.00068	8.77669	8.27064	8.72406	8.57047	8.32358	9.34847	8.58982	8.46079	7.94983	7.96836	8.46045	8.67184	8.18735	8.63021	7.75947
ENSG00000011304	0.828582	10.3162	10.466	10.6489	10.4794	10.8283	10.7004	10.6828	10.6797	9.42286	9.47231	10.7025	10.5132	10.4543	10.5425	10.8046	10.5143	10.027	9.08417	7.75996	9.10428	9.74616	7.74831	9.56484	7.70149	8.28702	9.26532	8.58192	8.00456	9.95473	10.4971	7.95175	7.91877	9.41871	9.35839	9.13596	9.44196	9.66706	9.11591	9.32246	9.3656	9.25821	7.88338	9.17427	9.6717	8.41127	9.46237	8.8497	8.95441
ENSG00000011332	0.606751	6.86403	7.20859	7.58955	7.17389	6.86594	7.1269	6.91401	7.35244	6.90526	7.25156	7.22448	7.03355	7.24911	7.35231	7.44485	7.1648	7.52416	7.3196	8.34178	6.67584	7.23075	8.06629	6.77969	8.01775	7.75373	6.83329	7.16932	8.89547	7.24826	7.15548	7.18324	8.28977	6.98095	6.87452	7.3383	6.99198	6.80453	7.22606	7.049	6.9017	6.87601	7.0438	7.69921	6.75133	7.02337	6.73325	6.78492	6.88115
ENSG00000011376	0.654187	7.30465	6.99051	7.6786	7.36629	7.54162	7.5432	7.88531	7.24168	6.93073	6.79911	7.94785	7.61905	7.05034	7.2646	7.24439	7.12881	6.59966	6.8835	7.05305	6.45277	6.38134	7.36092	6.31367	7.27382	7.25111	6.69739	7.04881	6.52221	6.55012	6.59536	6.63877	7.26576	6.36859	7.1198	6.56839	6.32838	6.64452	6.34928	7.19099	6.77299	6.52045	6.48014	6.7222	6.44406	7.13332	6.53363	6.45186	6.61843
ENSG00000011422	0.472401	7.26492	7.2597	6.935	6.97072	7.04069	6.99546	7.11437	7.04393	8.2038	8.52775	7.26566	7.19573	7.11085	7.20923	7.19936	6.95759	7.19051	7.81781	7.47604	7.75599	9.09815	7.64856	7.40078	7.49317	7.79608	7.75521	7.62683	7.58015	7.66346	7.632	8.0514	7.37946	7.85335	7.78721	8.05576	9.27961	7.671	7.9631	7.36052	7.91789	7.89119	7.76035	8.006	7.48012	7.78859	7.96967	7.81499	7.54893
ENSG00000011454	0.56331	7.16837	7.18689	6.99621	7.19419	7.24374	7.28257	7.18248	7.37418	7.43878	7.3383	7.35299	7.33849	7.29761	7.30517	7.31133	7.31553	7.4739	6.67153	7.65482	7.49547	6.75554	7.43567	7.44886	7.61397	7.31026	7.35367	7.83105	7.37714	7.02743	6.99208	6.94153	7.91932	6.7082	6.64837	6.71011	7.1748	7.3444	6.66702	7.72318	7.14534	7.37397	7.10343	6.82233	7.5222	7.56292	6.92729	7.12749	7.32176
ENSG00000011465	0.136384	9.51876	9.0182	8.56827	7.27302	8.7153	7.60185	8.25571	7.5118	11.2614	11.1025	8.40932	8.83246	7.87556	7.72496	8.18816	7.37251	11.5634	10.3235	7.80494	11.7299	7.04252	7.44169	11.3017	7.59589	6.89928	10.4776	7.74757	7.40932	8.18514	9.96723	10.9698	7.82792	9.46654	9.64714	9.13573	11.6466	11.8846	8.80528	8.46146	11.537	10.8084	10.462	8.40306	11.324	9.16147	6.81619	9.82172	9.55145
ENSG00000011478	0.785301	5.55262	5.45243	5.79198	5.88365	5.60251	5.62879	5.4941	5.67491	5.77107	5.53539	5.23375	5.66024	5.38582	5.63786	5.59158	5.5114	5.45395	5.83583	5.31278	5.38082	6.04429	5.3995	5.65062	5.43147	5.5297	5.70466	5.7392	5.48869	5.75198	5.56485	5.45052	5.2065	5.47344	5.53657	5.73078	5.46684	5.58538	5.68181	5.656	5.47653	5.28732	5.59734	5.92674	5.37515	5.47943	5.60223	5.57312	5.48349
ENSG00000011485	0.711181	6.5723	6.96143	7.03094	7.03518	7.06662	6.98725	6.98521	6.89914	6.82984	7.04735	6.73574	7.02669	6.99071	6.72694	6.92095	6.69679	7.29904	7.80445	7.36844	7.38391	7.50577	7.58165	7.41355	7.15496	7.65853	7.38651	6.95567	7.92297	7.29039	7.92957	7.5301	7.22784	7.37023	7.5869	7.69759	6.9516	7.58031	7.49798	7.0918	7.09835	7.47654	7.64221	7.42313	7.24772	7.3124	7.35672	7.08456	7.17626
ENSG00000011566	0.822413	7.37284	5.9798	6.296	6.41293	6.96829	6.68852	6.67644	5.43748	6.66864	5.80397	6.47207	6.66739	5.94275	6.44191	5.65711	5.88427	5.45102	4.60645	5.53955	5.91461	4.12378	4.68193	6.06093	5.06748	4.75573	5.03178	5.69402	4.56825	5.02801	4.97748	4.86874	6.15497	5.35335	5.13712	4.88841	6.11082	6.71369	5.06612	6.25325	7.20436	6.18041	6.47836	3.99425	6.0038	5.355	4.8862	6.7479	5.8327
ENSG00000011590	0.308582	4.91638	5.32025	4.93066	5.05514	4.96752	4.89534	4.88568	5.5918	4.90219	4.84765	4.85245	4.96637	5.02683	4.8559	5.21316	5.11557	4.83085	4.77273	4.67955	4.61252	4.70504	4.65561	4.58185	4.56646	4.80416	4.78988	4.66587	4.72277	4.63012	4.75234	4.84109	4.73356	4.75498	4.76525	4.67637	4.6445	4.74522	4.8434	4.7261	4.62858	4.54168	5.05996	5.25268	4.59565	4.58964	4.61229	4.68103	6.14131
ENSG00000011600	0.281093	5.05315	5.30416	5.22295	5.21558	4.93036	4.6431	4.82371	5.81731	5.20058	5.43905	4.62727	5.12121	5.3777	5.45879	5.14789	4.9934	5.23929	7.8185	6.87346	8.52087	10.936	7.25437	7.42684	6.97717	6.9563	8.47802	8.16773	6.29294	7.30339	6.62923	7.06947	6.93782	8.34563	7.12093	8.04968	11.0181	7.80851	8.00581	6.28217	9.48175	7.06017	6.10487	6.65885	5.962	8.37368	10.9677	6.98359	5.5041
ENSG00000012048	0.700728	6.53935	6.34857	6.40437	6.80126	6.84147	6.59273	6.68023	6.63191	6.09167	6.17178	6.88931	6.88937	6.73001	6.79255	6.39342	6.6619	6.36886	6.65588	6.32611	6.07131	6.80904	6.2091	6.11008	6.44622	6.17944	6.41009	6.43401	6.10042	6.83693	6.37233	6.66117	6.06611	6.62138	6.16703	6.34594	6.062	6.24784	6.22282	6.22892	6.25749	6.15547	6.73386	6.27671	6.16036	6.18568	6.43028	6.52184	6.82041
ENSG00000012061	0.57844	7.85448	8.08509	7.98955	7.86401	8.11574	8.09065	8.1712	8.08195	8.8606	9.08391	8.55553	7.85247	7.91778	8.0438	8.32449	8.07004	8.34909	8.09754	7.61844	7.75494	8.0347	7.82606	7.89725	7.71698	7.92528	7.46918	7.67012	8.05971	7.8064	8.78753	8.53656	7.66	7.34756	7.60593	7.7672	7.67112	8.1579	7.68719	7.97184	7.40958	8.4238	7.97402	8.59534	7.70486	7.8015	7.7256	7.83286	7.58373
ENSG00000012171	0.286473	5.91975	6.0425	6.12963	6.12895	5.776	6.01801	6.00972	6.30918	6.36116	6.087	5.93209	5.98372	5.95103	6.12274	6.06851	5.96626	6.2862	7.58032	6.98907	6.47969	6.15684	7.05615	5.91647	6.83501	6.77424	6.4437	8.11003	6.07414	6.08313	6.47368	6.44798	7.02103	6.8948	6.67145	5.985	6.44702	6.37744	6.68315	6.1488	7.15162	6.29842	6.03064	6.63734	6.10642	7.68514	5.88065	6.82128	6.22726
ENSG00000012174	0.695944	6.36892	6.17683	6.24386	6.34993	6.09419	6.2655	6.15406	6.23131	6.06466	6.47955	6.12218	6.39011	6.32942	6.22804	6.34902	6.31015	6.55303	7.04934	6.73596	6.74547	6.81129	6.7415	6.84886	6.65223	6.7452	6.89825	6.62744	6.92102	6.73922	7.00021	6.99065	6.5869	6.95487	6.96318	7.08028	6.5854	6.79997	7.11656	6.79603	6.84087	6.66891	7.14	6.73717	6.41822	6.64525	6.84931	6.80359	6.88084
ENSG00000012211	0.607892	5.14618	5.10559	5.29809	5.28645	5.08082	5.30962	5.09002	5.23681	5.14163	5.38224	5.15627	5.34751	5.82439	5.77137	5.38397	5.65871	5.10628	5.75845	5.41626	5.57464	5.81828	5.46222	5.34296	5.67543	5.23525	5.49879	5.25821	5.52656	5.32871	5.41295	5.82234	5.37737	5.38214	5.46617	5.71339	5.24449	5.51141	5.52319	5.39249	5.42725	5.39429	5.76322	5.6363	5.73165	5.36115	5.59251	5.5487	5.49724
ENSG00000012232	0.963156	6.96245	7.0383	7.08967	7.09268	6.94089	6.73114	7.01673	7.29434	6.84295	6.82384	7.12739	6.88429	6.97358	7.12499	7.17509	6.82744	6.94839	6.94274	6.93194	6.80411	6.86377	6.94989	6.62388	6.81171	6.80385	6.47415	6.61717	7.65961	6.33104	7.3053	6.6404	6.84267	6.49994	6.5889	6.27261	6.50514	7.03012	6.67119	6.37452	6.99371	6.57816	6.9351	6.75024	6.80196	6.63315	6.79499	6.36606	6.7536
ENSG00000012660	0.747964	7.64697	7.5237	7.37886	7.49124	7.5144	7.3827	7.51083	7.45936	7.33265	7.25316	7.48139	7.48468	7.74077	7.59676	7.58378	7.62522	7.38036	7.77494	6.96483	7.11242	7.52447	6.95378	7.45028	7.13603	7.00251	6.60752	7.43469	6.94751	7.19153	6.63064	6.60119	6.88352	6.6203	6.79304	7.14913	7.29532	7.24279	7.0895	6.80403	6.86948	7.16267	6.15756	6.65322	7.70028	7.19312	7.19882	6.32852	7.41953
ENSG00000012779	0.676219	5.17346	5.33465	5.19986	5.24798	5.12816	5.17649	5.1512	5.43111	5.12121	5.12221	5.07966	5.1933	5.39765	5.21157	5.25682	5.29243	5.21577	5.63568	5.51765	6.68799	7.66465	5.56182	5.9194	5.50021	6.53431	5.72882	5.8193	5.47044	5.58831	5.51054	5.66949	5.55094	6.18368	5.88372	5.68676	7.67074	5.45561	6.06589	5.40981	6.16936	5.71597	5.61103	5.72092	5.44229	5.83608	7.32371	5.92268	5.37051
ENSG00000012817	1.03561	8.21362	8.31116	8.1133	8.19669	8.39192	8.05072	5.70796	5.56574	7.56992	7.26348	5.40194	5.50057	5.57593	5.45958	5.49682	5.53432	7.38812	8.30466	7.64911	7.97904	7.4886	7.76326	5.78121	7.73087	8.02066	6.33149	8.0409	7.15929	6.80801	6.91658	7.71861	7.67439	8.46542	7.48599	7.67781	7.63018	6.1321	8.02947	8.09516	6.14908	7.77203	6.768	7.33318	7.95176	8.15756	7.50586	8.30387	7.71478
ENSG00000012822	0.574922	7.26377	7.4617	7.42729	7.10193	7.10287	7.16385	7.28873	7.38493	7.89161	7.86526	7.03875	7.14767	7.25366	7.02558	7.54345	7.06435	7.91207	9.01222	8.50618	8.5989	8.92549	8.85398	8.78242	9.07385	9.19433	8.72442	8.53581	8.79452	8.69371	8.75468	9.08245	8.42248	8.11745	8.24975	8.17836	9.08134	8.40377	8.21696	8.80271	7.85628	8.52286	8.77329	8.82812	8.76139	9.05714	8.26157	9.03611	8.91691
ENSG00000012983	0.763562	5.82334	5.19217	5.29438	5.3132	5.66239	5.39844	5.33951	4.98872	6.33699	5.65682	5.34172	5.39571	5.30153	5.48679	5.36774	5.20337	5.33261	4.60277	5.48194	5.53738	4.65719	4.89818	5.66359	5.28781	4.77624	5.26427	6.70104	4.77259	5.2187	5.16775	4.74058	5.48611	4.82841	4.86197	4.8994	5.14046	5.62083	5.32326	5.28479	5.52107	5.45601	5.12948	4.62306	6.06471	5.83182	5.11086	5.04845	4.99004
ENSG00000013016	0.600627	7.43069	7.97364	7.74497	7.92141	7.97572	7.59041	7.63394	6.92746	10.1823	10.1271	7.58207	7.37736	7.3718	7.63675	7.3417	7.44189	7.07607	8.25398	9.80654	7.12319	7.41175	10.0173	7.16763	8.6116	9.80396	6.37326	8.08261	7.64143	7.9048	7.00927	7.96823	10.0802	6.63556	7.28163	7.10395	6.66808	6.60248	6.83812	7.65081	7.45505	6.7908	6.52707	6.53855	6.76891	8.84999	7.24361	6.50409	6.38996
ENSG00000013275	0.644141	8.66019	8.65116	9.1958	8.69085	9.10141	8.81459	9.13657	8.91544	8.56627	8.84514	9.07219	8.47167	8.41938	8.52464	8.95865	8.53681	7.78022	6.9129	6.92833	7.53686	7.7233	7.37155	6.91486	6.86828	7.69422	7.17893	7.32557	7.37845	8.32701	7.48076	6.98889	7.101	6.90067	7.70531	7.70135	7.84905	7.72159	7.06379	7.39013	7.83511	7.94103	7.22437	7.43537	7.25718	7.20802	7.6803	6.88056	7.57574
ENSG00000013288	0.558589	5.70872	5.39144	5.56666	5.4697	5.79158	5.35931	5.80349	5.76914	7.43232	7.18834	5.43047	5.63935	5.56261	5.36695	5.31694	5.54998	5.51196	6.44411	6.38933	6.59009	5.95758	6.13549	6.32868	6.92301	5.7961	6.11268	6.08089	6.28707	5.72617	6.19815	5.91788	6.51067	6.05175	6.1246	6.04897	6.90851	6.48002	5.88449	6.62988	6.30054	6.17813	5.82674	6.89136	5.85774	6.46351	6.39957	6.82218	5.66108
ENSG00000013297	0.746384	5.14609	5.32479	5.26907	5.37383	5.1235	5.42615	5.13692	5.48033	5.44641	5.58924	5.1663	5.39465	5.40375	5.297	5.23147	5.31702	5.64836	5.56661	5.59473	5.54841	6.03855	5.39954	5.60825	5.55653	5.47248	5.47035	6.16239	5.59722	5.62033	5.78197	5.59575	5.42771	5.53425	5.5323	5.98856	5.43535	5.66176	5.76144	5.50121	5.74001	5.62518	5.53167	5.58271	5.42235	5.9962	5.71836	5.50574	5.81524
ENSG00000013364	0.229588	6.76641	6.68349	6.68636	6.23072	6.5696	6.44658	6.7056	6.62156	9.85791	9.69749	6.97399	6.37868	6.39401	6.13073	6.78755	6.27705	6.48387	8.72878	6.74967	7.9285	7.8932	6.90074	7.8303	6.50496	7.10162	9.64391	6.93236	6.37524	6.42196	7.1816	7.67432	6.77935	9.21431	9.26692	7.38217	8.59561	8.70032	8.20944	7.3501	7.8473	8.50355	6.91851	7.47666	7.54912	7.22893	8.49678	8.01698	7.1986
ENSG00000013375	0.755625	8.50594	7.61054	7.40356	7.79406	8.11308	8.12922	7.74229	7.38081	9.87127	9.43653	8.41557	7.82167	8.43827	8.1376	8.08848	8.62391	6.97624	5.48222	5.68675	5.59012	5.50393	5.54005	5.55316	5.6864	5.18022	5.42072	5.37642	5.32175	6.15522	5.49893	5.50743	5.69411	5.42961	5.90981	6.07176	5.91999	5.54703	6.61639	6.74733	6.8366	6.40467	5.42684	5.93674	5.67684	5.54583	5.32819	6.00818	7.1818
ENSG00000013441	0.789891	6.36769	5.57146	5.45779	5.48583	5.80392	5.81952	5.73175	4.74502	6.48268	6.13687	5.60997	5.11658	5.65349	5.44544	5.96426	4.93843	5.75903	5.59593	6.22964	6.81605	5.5352	5.8451	7.40505	6.69363	5.96469	5.80834	7.94377	5.415	6.12272	5.90632	5.67533	6.63993	5.62838	5.02684	5.65301	7.05457	5.59308	5.93673	7.46607	6.76182	7.13069	5.8442	5.16593	7.84626	7.06399	5.74188	6.51194	5.76417
ENSG00000013503	0.820528	8.81758	8.32024	8.58792	8.43175	8.71517	8.26253	8.54362	8.4101	8.48613	8.12275	8.61519	8.25117	8.20607	8.14117	8.08806	7.86287	8.20564	7.06554	6.99212	7.07708	6.68522	6.95665	7.05089	7.36136	6.53138	6.82074	7.09668	6.69176	7.4606	6.94755	6.99938	7.07129	7.11011	7.51928	7.42673	7.32045	7.33473	7.30292	7.25804	7.57414	7.34126	7.05719	6.39602	7.34501	7.18295	7.03736	6.79815	7.32637
ENSG00000013523	0.588708	7.08494	7.25246	7.36565	7.24636	7.34129	7.22958	7.36904	7.24174	7.35749	7.35132	7.23942	7.1815	7.2396	7.25495	7.29577	7.20213	7.18018	7.77769	7.63688	7.44384	7.92313	7.68244	7.70638	7.57683	7.62716	7.39181	7.92042	7.5239	7.94072	7.92936	7.43502	7.78286	7.57963	7.29674	7.82428	7.56384	7.54323	8.15445	7.90418	7.3375	7.33737	7.38587	7.58013	7.48285	7.92522	7.7881	7.66173	8.30604
ENSG00000013561	0.76779	6.16035	5.59288	5.67454	5.44703	5.75963	5.72014	5.8272	5.40646	7.92662	7.46468	6.02864	5.85646	5.90867	5.94799	5.29626	6.22621	5.86717	6.22637	6.62818	6.64317	5.90569	6.39198	6.39455	6.25265	5.87783	6.40716	6.31869	6.15305	6.07376	5.44575	6.70206	6.48668	6.07995	6.85113	5.93841	6.29152	5.78784	5.87773	6.57491	7.08218	6.69308	6.57914	5.78847	6.10679	6.56355	6.38798	6.58297	7.43287
ENSG00000013583	0.80899	8.84528	8.83529	8.92998	8.88249	8.95547	8.42874	9.01341	8.52229	10.045	10.0039	9.36345	9.01438	8.86263	9.06302	9.37351	8.53708	8.76608	9.97163	8.68665	9.3746	9.65368	8.76485	9.17991	8.98268	8.46453	8.44445	9.32244	8.14161	9.94417	9.25007	8.45803	8.65675	11.0326	9.06046	8.80591	9.12127	9.95052	9.05522	8.65322	8.72194	8.61845	8.18622	8.76096	8.88605	9.47994	9.48358	8.92094	8.44677
ENSG00000013619	0.76291	5.91126	6.06988	6.08261	5.70317	6.09787	5.62431	5.96502	6.03889	6.62417	6.57161	6.34302	5.89768	6.17937	5.98559	6.13286	5.96182	6.41944	7.61967	7.58251	6.82339	7.17005	7.08917	6.49214	7.5512	7.2035	6.60607	7.05973	8.0392	6.68155	7.52721	6.98934	7.64674	6.70576	6.82252	6.74483	6.87571	7.84987	7.13825	7.4594	6.52727	6.61205	6.85392	7.61615	6.59207	7.52162	6.66097	6.70102	8.16754
ENSG00000013725	0.279134	6.5526	6.72761	6.7689	6.62288	6.8775	6.67058	6.71647	6.84295	6.63121	6.71003	6.56488	6.58505	6.72766	6.49725	6.74284	6.72658	6.84898	7.54077	7.22554	7.12474	7.66644	7.26967	7.01018	7.33852	7.15419	7.22998	7.26525	7.35031	7.15853	7.09609	7.63897	7.13947	7.33184	7.38806	7.11545	7.24786	6.97369	7.5282	7.12889	7.12623	7.03554	7.53619	7.53611	7.0324	7.24472	7.59918	7.33272	7.14277
ENSG00000013810	0.928242	8.29058	9.08498	9.18999	9.13667	9.20927	8.89424	9.127	8.55261	6.31807	6.56743	9.41989	8.91512	9.11429	9.10065	9.45473	8.83972	8.21274	5.96286	5.28578	5.78281	7.54677	5.19511	5.34695	5.51586	5.62706	6.03971	5.14848	5.76013	7.77901	7.02924	6.40819	5.4373	5.89032	5.47077	5.73312	5.65716	5.22002	5.95628	5.64989	6.00624	5.49339	5.88944	6.62102	5.95008	5.74266	6.49636	5.72235	8.00925
ENSG00000014123	0.765103	6.13948	5.62402	5.49661	5.36106	5.91902	5.35203	5.8853	5.52042	6.33791	6.40207	5.59531	5.96654	6.1622	5.85864	5.16019	5.90828	5.43488	5.03908	6.121	6.01143	4.6775	5.18104	5.86889	6.08934	4.96927	5.64054	6.92466	4.64038	5.75244	4.98596	5.73499	6.13721	5.80132	6.06621	5.70323	5.58909	5.58211	5.83016	6.94984	6.21115	6.01311	5.63457	5.01468	5.66797	6.48926	5.69919	5.92714	5.76044
ENSG00000014138	0.77987	7.4802	7.41348	7.592	7.64036	7.59132	7.53867	7.36989	7.37539	6.86075	6.71851	7.53557	7.39049	7.25506	7.66373	7.10631	7.50519	7.27838	6.66979	6.52083	6.50616	7.36897	6.87141	6.52907	6.43654	6.89447	6.45502	6.34994	6.49082	7.30307	6.95335	6.89809	6.55945	6.6941	6.53063	6.91884	6.26714	6.9113	6.90378	6.42619	6.5858	6.43203	6.77774	6.52775	6.56846	6.46016	6.90012	6.70239	7.13888
ENSG00000014641	0.768511	12.4703	12.388	12.2769	12.4656	12.2636	12.3705	12.526	12.6098	11.6863	11.7209	12.2846	12.3501	12.0665	12.2562	12.1074	12.0458	11.9084	10.6033	12.2524	10.5113	9.65986	12.3606	10.0513	12.0238	11.0102	10.63	10.7391	10.6802	10.197	9.07476	12.8427	12.3901	10.5265	11.3042	10.7446	10.4768	9.84671	9.11144	11.2499	10.4759	10.76	10.1164	9.98232	10.5397	10.82	9.9733	11.1587	9.90484
ENSG00000014824	0.702584	9.44007	9.01332	8.72912	9.13637	9.18643	9.21861	8.79501	8.7717	9.19481	8.58051	9.35309	9.30984	8.58413	8.89746	8.34153	9.08753	8.5168	6.65662	7.96711	7.15474	5.5232	7.58598	7.33421	7.37326	6.94607	7.17462	7.30492	6.62821	7.43482	6.60034	7.11079	7.85405	6.86879	7.77762	6.71557	7.75426	6.97804	6.69151	7.93339	7.57016	7.19894	6.81387	5.93754	6.79795	7.43999	6.65037	7.80807	6.76422
ENSG00000014914	0.259682	6.07143	6.66286	6.42668	6.12389	6.08436	6.40487	6.21186	6.39323	7.5708	7.40803	6.22762	6.31873	6.38191	5.97572	6.56374	6.40792	6.62064	8.8203	7.33023	7.55828	7.23614	7.06522	7.37518	7.40154	7.24625	8.97608	7.1025	7.11639	6.7692	7.75552	7.2633	7.36878	9.66711	8.27676	7.12769	7.40728	7.63014	7.20807	7.65049	7.05763	7.23371	7.01113	7.52739	7.62861	7.75508	7.25312	7.88249	7.76478
ENSG00000015133	0.850287	4.7771	4.87552	4.88339	4.92434	4.76205	4.86777	4.77432	4.80583	4.37197	4.60413	4.78891	4.62919	4.78939	4.72582	4.93758	4.69503	5.01369	4.79713	4.82865	4.84936	5.86523	5.22497	4.82756	6.38613	5.01065	4.88817	4.85186	4.97699	5.10627	4.98367	4.91614	4.7501	5.26778	4.99921	4.95031	5.08992	4.64405	4.88101	5.16812	4.72485	4.87791	4.7956	4.99972	4.84911	4.77073	5.28927	4.81717	4.92461
ENSG00000015153	0.819504	5.4899	5.51465	5.57633	5.62866	5.64911	5.69352	5.47915	5.77934	5.96808	6.0866	5.55756	5.60012	5.38311	5.32729	5.39668	5.66481	6.34852	6.65434	6.69208	6.43069	6.10553	6.5121	6.26789	6.5499	6.17338	6.6855	6.73163	6.51814	6.06031	6.04673	7.21195	6.84121	5.9625	6.74377	7.06397	6.19073	6.62752	6.54643	6.46912	6.7004	6.68175	7.46274	6.28262	6.4831	6.62803	6.71698	6.29547	6.66068
ENSG00000015171	1.00334	7.53108	7.28284	6.97953	7.32118	7.19001	7.50885	7.29105	7.32015	7.97969	8.02356	7.6285	7.54194	7.21683	7.35672	7.21806	7.18126	7.64641	6.9771	8.83799	8.86632	6.26126	7.85195	8.57781	8.30379	7.46846	7.83574	8.82489	7.90029	7.15557	7.39042	7.79388	8.81304	7.4383	7.81211	7.09231	7.77975	8.22578	7.66397	8.45758	7.77995	8.18575	8.2867	6.58933	7.78595	8.08568	7.91774	7.80925	7.28197
ENSG00000015475	0.692219	7.79718	7.68692	8.45123	7.83263	7.90448	7.83971	8.01469	7.81511	6.95881	7.18914	8.02046	7.46849	6.80267	7.0645	7.69788	6.80052	6.82992	6.4827	7.18963	6.73378	8.05015	7.82143	6.72982	7.37755	7.00782	6.96691	6.86291	8.1626	6.90795	6.84848	6.79848	7.38108	6.79437	6.67524	7.30136	7.31872	6.58568	6.93807	6.44646	6.81772	6.99015	6.56097	7.02878	6.77698	7.00059	7.93252	6.50119	6.50356
ENSG00000015479	0.526763	11.0133	10.3353	10.652	10.5499	10.8983	10.7032	10.6487	10.4294	9.69768	9.54974	10.7769	10.7944	10.6035	10.6955	10.3019	10.5957	10.5299	7.58903	10.5636	9.87439	7.23939	9.95882	10.1946	10.2827	9.37636	9.464	10.3306	8.86164	9.64294	9.29439	8.61191	10.7157	9.16305	9.78239	8.76376	10.1103	10.4097	9.53207	10.3002	9.90209	10.1219	9.56145	6.97937	9.9112	9.87321	9.68072	9.69572	10.1563
ENSG00000015520	0.20107	6.36025	6.23105	6.23788	5.99163	6.22513	5.9352	5.99537	6.31674	6.30807	6.22986	6.08513	6.21593	5.95075	5.84557	6.0608	6.22388	6.45823	7.1578	6.86784	6.57807	7.60471	7.01378	6.67634	6.84711	6.9679	6.65938	6.85161	6.97131	8.06878	6.63381	7.01656	6.83825	9.7792	6.90664	7.71968	6.54913	6.85598	7.08931	6.84786	6.57118	6.65086	7.32442	6.87928	6.70341	6.82532	6.86783	7.09871	6.83281
ENSG00000015532	0.701658	6.62859	6.85433	6.90122	6.58555	6.6216	6.74496	6.6291	7.02612	7.68352	7.44737	7.04449	7.12758	7.21907	7.29874	7.54075	7.68114	6.45059	6.61898	5.79275	6.2683	6.12414	6.18894	6.06153	5.6069	7.13464	5.97637	5.61735	5.83283	6.09508	6.33772	6.29051	5.95775	5.82084	5.82413	5.40948	5.96343	6.64274	6.3122	5.99768	5.8839	5.80608	5.27259	6.68185	6.0779	5.92246	5.73007	7.58474	6.97286
ENSG00000015676	0.87851	7.21402	7.52998	7.45347	7.33033	7.35055	7.39243	7.40884	7.44896	7.67564	7.69987	7.48992	7.29848	7.62634	7.41396	7.36369	7.41086	7.49809	7.81968	8.00428	7.58137	7.41916	8.43665	7.54481	8.1397	8.34453	7.49629	7.55458	8.33682	7.34729	7.71353	7.60144	8.1083	7.3874	7.54754	7.48453	7.4781	7.68358	7.72976	7.52782	7.27	7.57094	7.69717	7.45514	7.55777	7.90079	7.27452	7.54603	7.63027
ENSG00000016082	0.795407	6.45894	5.96162	5.88718	6.29831	5.53358	5.73606	5.84104	5.39646	6.04008	5.92197	5.20716	5.06731	5.32108	5.39233	5.45732	4.95405	7.48219	5.22998	5.37025	5.61517	5.48574	5.10007	5.68316	6.13471	5.08982	5.41997	5.47084	5.24455	5.74754	5.40303	4.97737	5.15735	5.57005	5.21856	5.65269	5.21356	5.34766	5.42232	6.41292	7.98266	6.19352	5.10686	5.25387	5.36508	5.1322	5.24854	6.37281	5.37909
ENSG00000016402	0.582017	4.33594	4.3948	4.28199	4.36799	4.32016	4.56265	4.4299	4.56536	4.32337	4.32275	4.38587	4.39593	4.36986	4.44971	4.32758	4.36689	4.57245	4.88428	4.83888	4.40325	4.47728	4.75705	6.54955	4.50529	4.77517	4.6952	5.44302	4.52749	4.49651	4.46071	4.54813	5.00496	4.25772	4.38514	4.54209	4.67569	4.61334	4.85815	4.66287	4.36332	4.77672	4.64287	4.59462	6.09869	5.23189	4.5908	5.16772	5.14451
ENSG00000016864	0.841452	7.99881	7.26707	7.55738	7.43379	7.77697	7.34363	7.60186	6.82893	9.04003	8.98302	7.90138	7.61579	7.4054	7.62338	7.1945	7.14554	7.42597	6.67143	6.94903	6.93019	5.65526	6.48767	7.26871	6.90404	6.25899	6.70813	6.98474	6.47933	6.8552	6.30661	6.53432	6.92767	6.40123	6.81005	6.21603	6.78336	6.835	6.6695	8.63205	7.95536	6.79345	6.1421	6.57876	6.50339	6.80554	6.29632	6.9377	8.13092
ENSG00000017260	0.245838	7.43414	6.84774	7.21261	6.95383	7.16973	6.94255	7.22764	6.6422	7.44052	7.28832	6.96094	6.86136	6.79773	6.80316	6.62128	6.76007	6.55492	6.0122	7.37798	6.14962	5.92569	6.90365	6.31195	6.96419	6.47352	6.10846	7.18822	6.96885	6.10527	5.82958	6.32424	7.42598	5.96698	6.28932	6.00917	6.88194	6.14506	5.99354	7.04922	6.2084	7.18739	6.60271	5.95498	6.48879	7.28187	5.9472	6.19554	6.32036
ENSG00000017797	0.588005	8.13904	8.06248	7.91445	8.05479	8.15788	7.80857	8.11423	7.76051	8.55467	8.07602	8.21722	8.11319	8.15578	8.27293	8.11052	8.16395	7.48543	6.92527	7.83666	7.79809	7.45006	7.56426	7.46142	7.31777	7.582	7.73635	7.83075	6.66222	7.11049	6.69928	7.22527	7.76961	6.70723	7.46252	6.94907	7.05773	7.03046	6.86402	7.34295	7.46692	7.52809	7.73512	6.92156	8.06972	7.55564	7.33879	7.26629	6.87122
ENSG00000018189	0.230828	5.48104	5.69399	5.43831	5.62919	5.51514	5.66859	5.49925	5.49168	6.23787	6.14189	5.67709	5.691	5.76629	5.94141	5.60647	5.65433	7.26214	5.73967	7.42029	6.09344	5.28984	7.02506	6.20028	6.88587	6.77935	5.60106	7.36328	6.53738	5.29397	5.65972	5.71895	7.47068	5.70679	5.89186	6.09255	5.71874	5.91775	5.88902	7.27522	5.49075	6.02959	5.71092	5.38738	6.36535	6.95011	5.63134	5.64879	6.32323
ENSG00000018236	0.226764	6.41209	6.62729	6.69229	6.38751	6.44169	6.58167	6.57885	6.44456	6.13029	6.22382	5.8266	6.3709	6.38445	6.35347	6.24878	6.1898	6.52324	6.93228	7.99814	7.96975	6.96152	7.33085	6.96606	7.09363	6.94055	6.74187	7.36368	8.04869	6.73335	7.25125	6.65781	7.89362	6.99431	6.94862	6.80718	6.75925	7.5219	6.52628	7.16862	6.65924	6.85035	6.60826	6.92636	7.12613	7.84409	7.08998	6.63993	7.06755
ENSG00000018408	0.647439	7.10823	6.52449	6.45178	5.97478	6.88826	6.29807	6.59905	6.20591	7.93842	7.8861	6.57653	6.67595	6.58004	6.57208	6.13436	6.70128	6.73814	6.44106	6.35498	8.50705	6.07739	6.00868	7.57985	6.53313	5.87991	7.6583	6.94741	5.97876	6.16762	7.06421	6.98064	6.32493	6.49477	7.70776	6.55329	7.45832	7.98109	6.9842	6.53713	7.69085	8.0006	6.87029	6.3203	7.29417	7.45826	7.22744	6.47081	6.15421
ENSG00000018625	0.254464	6.12432	5.78126	5.59989	6.21142	6.30638	5.88908	5.28905	5.13728	4.71374	4.80173	6.61629	6.3177	5.34693	5.30439	6.26889	5.29721	5.75018	5.14984	10.2447	7.2509	5.11048	9.67937	5.19202	10.286	9.99002	6.33271	9.58345	8.01886	4.916	5.38922	7.95459	10.0126	5.62702	4.98048	4.99433	5.08895	6.21889	4.92218	7.17105	4.96569	6.77657	9.19113	5.2546	5.32739	9.99836	5.11254	5.32254	5.06455
ENSG00000018699	0.615069	8.90091	8.28546	8.48643	8.52062	8.64844	8.78582	8.57945	8.56471	8.50757	8.23838	9.04869	8.61671	8.6297	8.79433	8.26344	8.7183	7.76103	6.84979	6.41997	7.00565	7.1881	6.52723	6.89052	6.437	6.36936	6.85825	6.60506	6.70495	7.06335	6.72207	6.77956	6.33006	6.7072	6.90831	6.82135	7.0966	6.98447	7.05503	6.93327	7.0901	7.37877	6.95631	6.2772	6.86081	6.53724	7.20663	7.00017	7.36939
ENSG00000019144	0.414633	6.61946	6.50061	6.80751	6.55691	6.59456	6.46127	6.58811	6.74286	6.70634	6.66896	6.63254	6.53918	6.52547	6.37673	6.75217	6.68121	6.74251	7.33011	7.00012	6.96835	7.17005	7.31319	7.11834	7.19755	7.21245	6.94936	7.48598	7.29035	7.18202	7.47135	7.28605	6.93722	7.12587	7.16516	7.26597	7.07257	7.30615	7.29986	6.9006	7.01544	6.90799	7.14376	7.62367	6.94415	7.19528	7.15715	7.2805	7.09412
ENSG00000019485	0.244734	6.72494	7.0167	6.9419	6.76965	6.58204	6.59181	6.64034	6.97119	6.47805	6.75292	6.66017	6.80186	6.80594	6.59559	6.60519	7.07776	7.13518	7.13413	7.06514	7.28915	7.29259	7.27425	7.30231	7.34508	7.45417	7.49001	7.36942	7.40513	6.94907	7.77373	7.37558	7.53256	7.68786	7.31822	7.32697	6.93113	7.4357	7.68362	7.34864	7.20125	7.2078	7.53723	7.72902	7.20889	7.20733	7.32542	7.4022	7.1212
ENSG00000019549	0.587294	6.88461	6.21542	5.5295	5.26427	5.93451	5.581	5.59903	4.93044	9.45775	8.83669	5.77413	6.52673	6.01214	5.24652	5.39008	5.14772	8.19267	5.90439	5.06457	8.88041	5.37133	4.93607	7.51203	5.17879	5.45096	6.74587	5.02588	5.97394	5.78061	9.02389	6.25858	5.09534	5.24296	7.26893	5.23929	6.89386	8.70204	6.60585	5.14139	7.17754	8.58399	5.28687	6.23744	8.89453	5.24971	6.8855	5.9653	5.45951
ENSG00000019582	0.339649	6.98279	7.42741	7.73532	7.19908	6.96812	7.27946	7.46376	7.26647	5.75383	6.2064	7.29463	7.06297	6.99312	7.13194	7.41505	7.31036	6.84357	12.266	10.5638	11.7832	11.7164	9.10689	11.183	10.6693	9.3551	11.5999	11.6001	7.68876	8.75199	9.56051	10.1494	10.4812	12.1508	12.1337	11.0121	13.2758	9.62039	10.9337	10.787	10.1557	10.6528	9.92496	11.2237	10.5467	12.2323	13.0575	10.3443	9.24955
ENSG00000020129	0.648347	6.98603	7.28626	7.23396	7.15647	7.39263	7.29451	7.30389	7.24875	7.22594	6.92061	7.16208	6.9755	6.96689	7.19533	7.13225	7.01384	7.01066	7.2687	9.44801	6.90937	7.08443	9.56239	6.89192	9.81339	8.8979	6.9966	7.702	8.6645	7.12544	7.33116	6.96696	8.96073	7.04241	6.93181	6.73835	6.82299	7.19498	7.26762	7.53956	6.85876	6.85508	6.99519	7.04508	6.91913	8.03936	7.05273	7.16486	6.98615
ENSG00000020256	0.697694	8.02343	7.55242	7.56354	7.8431	7.92158	7.99291	7.89369	7.52105	7.59441	7.25474	7.70802	7.94298	7.67646	7.72328	7.66119	7.20591	7.25902	6.97762	6.91891	6.85983	6.71772	6.99786	7.08419	6.7024	7.0528	6.91442	6.764	7.09285	6.55987	7.2838	6.83898	6.94684	6.8583	6.78978	6.39505	6.65326	7.00098	6.59661	6.70226	6.62041	6.85946	6.70993	6.97827	6.94405	6.83784	6.79342	6.66992	6.72567
ENSG00000020426	0.477104	7.94424	7.90747	7.07899	7.82208	7.98451	8.054	7.77453	8.02068	8.11352	8.39665	7.76528	7.6719	8.09547	7.9476	6.79553	7.8876	7.2878	6.75124	6.58416	6.83901	6.93859	6.58564	6.56917	7.14706	6.73737	6.67448	6.83352	6.46905	6.74889	6.52576	6.88245	7.02089	6.77206	6.75682	6.45918	6.94192	6.99056	6.43749	7.0675	6.8779	7.09475	7.74741	6.77995	6.98561	6.77852	6.62712	6.98801	6.73279
ENSG00000020577	0.745037	5.41237	5.48231	5.39525	5.43049	5.24482	5.546	5.46821	5.43323	5.95582	5.86882	5.22095	5.33677	5.35947	5.30923	5.27916	5.55064	5.45883	5.87928	5.92826	6.21617	5.67277	5.98347	5.87302	6.14847	6.28553	6.00072	6.08632	6.00906	5.81458	5.58621	7.18254	5.94737	6.00476	5.63005	6.29428	6.16218	5.61597	5.9595	5.8	5.81561	6.38587	7.2169	5.86166	5.90022	6.44315	5.73636	5.83651	6.75302
ENSG00000020633	0.402502	5.18146	5.26145	5.054	5.11367	5.02603	5.35847	5.10149	5.43876	5.04961	5.22707	4.99465	5.47792	5.3862	5.24647	5.27539	5.46401	5.61593	6.26459	5.71943	5.94989	7.91184	5.80994	7.01915	5.76574	5.85516	6.39538	5.74074	5.69261	6.02265	6.0613	5.7949	5.77659	6.79038	5.8601	6.55944	7.22376	5.56918	6.67644	5.77132	6.07459	5.92348	5.78574	6.1558	6.79202	6.06729	7.92206	6.53501	6.28592
ENSG00000020922	0.699507	6.71039	6.06292	6.20203	6.25038	6.36604	6.23681	6.28687	6.17143	5.75407	5.54743	6.12906	6.38339	6.02516	6.26449	6.06372	6.37567	5.82188	5.36002	5.15398	5.24379	5.26453	5.11134	5.33219	5.18762	4.99181	5.26062	5.34198	5.27811	5.34386	5.20978	5.31189	5.1987	5.00287	5.25945	5.22373	5.3175	5.0884	5.17785	5.19668	5.52962	5.30552	5.32187	5.20616	5.33919	5.43401	5.31193	5.19365	5.43755
ENSG00000021300	0.361747	6.51477	6.39295	7.08726	7.40393	7.04578	6.96058	6.85894	6.88337	5.51577	5.39123	7.27137	6.83931	6.2451	6.64852	7.46457	6.10307	6.46712	6.66985	10.2973	6.28078	6.6007	11.0108	6.57877	10.6451	10.5909	6.40071	11.8898	8.4874	5.83236	6.80604	6.70803	10.4624	6.18819	6.42043	5.88135	6.59259	5.61357	5.99682	9.35836	5.08272	5.73933	6.33725	8.57409	5.72195	12.4883	6.04804	6.18987	7.06746
ENSG00000021355	0.532921	6.52715	6.16179	5.88628	6.104	5.87118	5.97279	6.29354	6.23865	7.70371	7.45723	6.17499	6.36647	6.55358	6.49518	5.69177	6.45871	5.95515	7.45427	6.17153	7.51072	10.5553	6.07413	7.39866	6.30226	5.9713	8.35726	6.87989	5.94605	6.99379	6.32714	6.7133	6.23041	9.00775	8.17939	7.72937	9.49207	6.96308	11.2231	8.03761	8.10094	8.90831	7.20719	8.0695	6.79544	7.04778	9.68382	8.88631	6.28635
ENSG00000021574	0.867244	5.9106	5.3172	5.23549	5.45319	5.58298	5.69792	5.50062	4.99836	5.01831	4.92984	5.57145	5.81227	5.36244	5.21034	5.28388	5.4356	5.63027	4.41697	5.40866	4.70522	4.60866	5.17268	4.89125	5.20005	5.22116	4.81973	5.73819	5.05515	5.00555	4.70491	4.48885	5.56706	4.85748	4.67818	4.56617	4.77627	4.9015	4.55682	5.47727	4.89547	4.94268	5.25216	4.17693	5.01085	5.63397	4.89037	4.84005	4.84068
ENSG00000021645	0.235432	5.64969	5.53597	5.61759	5.46733	5.4917	5.55353	5.66503	5.76759	5.17242	5.36447	5.3827	5.55602	5.62531	5.66969	5.59611	5.43693	6.22459	5.8863	6.2527	5.86684	5.82161	6.55571	5.55836	6.18768	7.60623	5.64706	5.90104	6.23822	5.38512	5.61372	5.74448	6.3739	5.59644	5.6677	5.43716	5.42822	5.45346	5.80185	5.7937	5.40865	5.73356	5.90279	5.99088	5.41619	5.81865	5.55032	5.53064	5.48221
ENSG00000021776	0.690868	7.92382	7.6231	7.57693	7.65883	7.87698	7.77659	7.74282	7.61727	7.09836	6.97959	7.87925	7.81497	7.98946	7.87405	7.5623	7.83588	7.28939	6.50666	6.36795	6.9797	6.67577	6.42089	7.01693	6.18892	6.42068	6.91903	6.42012	6.51703	6.90766	6.60523	6.61023	6.45192	6.94522	6.89921	6.82304	7.00313	7.23117	7.10665	6.59399	6.74031	6.98526	6.55728	6.38741	7.19369	6.42776	7.07365	7.13702	7.04303
ENSG00000022267	0.897724	7.053	6.82962	7.16882	7.21512	7.0423	7.24796	7.30318	7.3205	6.56109	6.5776	7.25517	6.99394	7.24529	7.59517	6.74148	7.23949	7.0324	7.62235	8.70263	10.9153	6.82938	7.93328	7.62461	8.0945	7.38072	9.39454	7.89454	9.27089	6.46752	8.75589	12.1159	8.61775	7.95314	7.0525	7.04014	9.29431	8.74877	6.78781	7.99432	7.95924	11.5435	12.8016	7.25462	8.02194	8.28673	6.98611	8.25592	8.53083
ENSG00000022556	0.645553	10.045	10.0251	9.87101	8.73086	7.85436	5.76242	5.73284	5.71605	5.87895	6.11096	5.60819	5.78797	10.3757	10.1909	10.1605	10.2482	6.31985	6.90424	6.70733	6.23918	6.5851	6.47939	6.9128	6.87434	6.17667	6.78274	6.37956	6.8388	6.71609	6.48182	6.90533	6.61702	6.83368	6.58241	6.14276	6.51827	6.01986	6.49372	6.85872	8.61836	6.42051	6.32908	6.66545	6.45865	6.64158	6.65172	6.39139	7.50542
ENSG00000022976	0.713607	6.58443	6.63227	6.61018	6.47124	6.74687	6.69329	6.6527	6.56575	6.51487	6.85385	6.78132	6.59016	7.16147	6.94906	6.89306	6.77738	6.81682	6.9091	6.77355	6.66703	6.9967	6.95331	7.0649	6.73315	6.91101	6.57447	6.90084	7.01797	6.85497	7.13082	6.97655	6.88675	6.78907	6.81945	6.78043	6.73729	6.74311	6.85913	6.70839	6.80137	6.5327	6.95881	6.9404	6.49765	6.60281	6.82361	6.93461	7.4738
ENSG00000023041	0.804701	9.12254	8.93112	9.11153	8.81183	9.52572	8.64318	9.366	8.59142	9.03225	8.54136	9.09206	8.91183	8.07364	8.19335	8.6556	8.09425	8.82617	7.63454	7.82541	7.98066	7.65159	7.98571	8.34148	7.63401	7.44536	8.11606	7.85315	7.54678	7.94442	7.89586	7.48174	7.82831	8.60832	8.23763	7.94406	8.29175	8.07714	7.9901	8.30733	8.21173	8.0328	7.37129	7.24168	7.89289	7.85243	7.89424	8.20667	7.98023
ENSG00000023228	0.888779	9.22542	8.443	8.58057	8.76327	9.02968	8.88118	9.01087	8.81502	8.89089	8.70734	9.16727	9.08519	8.71684	9.13308	8.75436	9.08717	7.62909	7.63626	7.9875	6.96693	6.25723	7.21907	6.79322	7.37058	6.47745	7.56285	7.76422	6.66804	7.32935	5.8184	9.87336	8.26944	6.9972	8.30575	7.75531	6.82387	6.37725	6.3866	7.90839	7.03112	8.26463	9.22173	6.51477	7.18138	7.34553	6.54279	7.79358	7.25614
ENSG00000023318	0.622646	6.90013	6.89255	6.80678	6.78914	6.68557	6.87506	6.81438	6.78664	7.26184	7.31494	6.73522	6.85909	7.09106	6.89856	6.67141	7.05817	6.98294	6.6682	6.45924	6.75157	6.72419	6.5226	6.77651	6.50918	6.44159	6.93964	6.45892	6.50936	7.02037	6.64122	6.74048	6.54916	7.01445	6.84466	7.02717	7.07264	6.82415	6.90826	6.9971	7.25958	6.86354	6.52827	6.81604	6.65868	6.50561	7.07341	7.27739	6.71279
ENSG00000023330	0.573248	8.6799	8.20289	8.68498	8.66455	8.81437	8.93336	9.11598	8.28552	8.64698	8.20767	8.74828	8.6948	8.46329	8.52197	8.728	8.83115	8.2094	11.847	7.856	7.40309	8.75718	8.15041	7.01227	7.40664	9.00782	8.06982	7.44635	7.87558	7.08054	7.7452	9.16168	7.8208	7.97174	8.44557	10.8967	9.13007	7.35566	6.52182	7.07755	8.02758	7.93154	7.99897	7.92699	7.33521	7.48991	6.8919	8.50807	7.39317
ENSG00000023445	0.574358	3.98463	4.00596	4.16247	4.09763	4.13131	4.13327	4.11468	4.01824	4.06431	3.99563	4.07788	3.98945	3.99108	4.05263	3.90105	4.12832	4.28403	4.07923	4.1428	4.67136	4.29807	4.09337	4.6531	4.19778	4.14909	5.32873	4.24188	4.09469	4.08812	4.16885	4.32575	4.31434	4.7018	4.8601	5.55575	6.2387	4.21492	5.86546	4.34675	4.35462	5.89532	3.97867	4.04208	4.77671	4.26701	6.40068	5.8687	4.32198
ENSG00000023516	0.747128	6.63485	6.37877	6.27042	6.32402	6.46204	6.58892	6.35289	6.20879	6.71044	6.89616	6.39187	6.49296	6.36662	6.52919	5.90162	6.49492	6.62115	6.48478	7.66294	7.29528	5.87866	7.27613	7.27083	7.7336	7.05347	6.71368	7.78605	6.5412	6.39349	6.6542	6.34967	7.85972	6.85884	6.48488	6.63968	7.02234	6.91225	6.48104	7.53006	6.52347	6.83713	6.00018	5.63937	6.75391	7.37136	6.74905	6.97939	7.06864
ENSG00000023572	0.539412	7.79323	7.77615	7.82115	7.47228	7.67954	7.84393	7.79157	7.99443	9.50705	8.87857	7.84378	7.72203	7.36736	7.39459	7.28094	7.01393	7.63544	7.73882	7.76867	7.66236	7.17203	8.39546	7.15046	7.16966	7.43746	7.41215	7.7425	7.09989	7.4265	6.95987	8.35274	7.73602	7.3113	7.44647	7.98391	7.20971	7.18646	7.2425	7.16134	7.74988	8.66128	8.54694	7.17592	8.05645	7.53269	6.91165	7.11566	9.17337
ENSG00000023608	0.693706	4.99451	5.30079	5.21227	5.93865	5.95614	5.59067	5.99537	5.39598	6.00521	5.90326	5.47151	5.58185	5.82481	6.32097	5.31122	6.25568	5.50933	4.68774	4.61844	5.04948	4.56545	5.04834	5.00737	5.01146	4.79852	4.57628	5.22566	4.49482	4.58492	5.04158	4.72789	4.85291	4.73256	4.72086	4.6658	5.01685	5.12055	4.72914	5.69055	5.85105	5.40475	4.49227	4.87107	5.4237	4.90332	4.78092	4.51202	7.20844
ENSG00000023697	0.189989	8.18383	7.09224	7.6305	7.7021	7.96561	7.1793	7.75423	6.59913	8.64578	7.87737	8.312	7.9884	7.63293	7.72092	7.32397	7.31141	7.8093	5.36212	5.48011	6.20722	5.17008	5.08742	6.33805	5.58533	5.11447	7.52003	6.68404	4.74028	6.82604	5.08127	6.39857	5.62558	7.10242	7.77388	7.11521	6.90184	5.50116	6.32582	6.60103	7.25849	6.40397	6.17675	5.1425	6.89217	6.61588	6.86486	6.63856	5.2426
ENSG00000023902	0.248908	6.29349	7.05045	6.87058	6.9173	6.96045	6.98325	7.10341	6.48588	6.4139	6.12922	7.25847	6.74755	6.46186	6.52385	7.19359	6.60602	6.99982	7.43132	6.66532	8.06608	6.80807	6.81549	6.19215	6.24278	8.17189	7.94728	5.96064	7.83635	6.51387	6.97182	6.597	6.60076	6.54387	5.76804	6.29473	7.09176	7.36044	6.37676	5.76927	6.33113	8.15487	7.53115	6.34732	5.74925	6.45928	7.21309	5.81041	8.35089
ENSG00000023909	0.980878	7.2113	6.9626	7.35958	6.64377	7.33149	7.28351	7.17383	6.95257	8.63697	8.64859	6.8087	6.64532	6.43886	6.44508	6.44117	6.39171	5.8838	6.99395	6.78221	6.30159	7.80816	6.26773	6.31547	6.52809	5.97455	6.07971	6.98404	5.74077	8.06567	5.52904	5.86278	6.79151	7.19904	7.45259	7.41176	6.2108	6.30468	6.27493	6.78169	7.40874	7.26949	8.87786	5.75769	6.20775	6.86175	7.35369	6.02417	5.91968
ENSG00000024048	0.479726	6.43432	6.39031	6.43859	6.42216	6.30159	6.55949	6.54756	6.20447	6.64753	6.39022	6.28727	6.28664	6.37815	6.3817	6.17962	6.31289	6.23653	6.4434	6.3368	6.59824	6.78475	6.28263	6.79597	6.31416	6.32102	6.68767	6.52153	6.42731	6.50122	6.30932	6.44221	6.41676	6.67934	6.37306	6.32398	6.67158	6.49271	6.67697	6.59333	6.52807	6.51367	6.56801	6.17903	6.87942	6.41268	6.81792	6.96194	6.23271
ENSG00000024862	0.581332	8.81689	8.42629	8.3059	8.50099	8.71841	8.34186	8.58213	8.13096	8.03271	8.14161	8.82015	8.52526	8.47791	8.74669	8.17323	8.43048	7.52991	8.39579	8.53635	7.91436	8.06033	8.31685	8.38641	8.04342	7.47463	8.0345	8.10434	7.05299	7.30738	6.98091	7.1885	8.72908	7.96593	8.71566	7.53011	8.30014	6.33643	7.23532	8.43774	8.51612	7.91025	6.68112	8.1014	7.93308	7.99363	8.16122	8.18772	8.03426
ENSG00000025156	0.710196	4.7445	4.58837	4.5742	4.63295	4.86192	5.02433	4.67779	4.61075	4.59596	4.42209	4.99012	4.8976	4.6896	4.73359	4.64291	4.67027	5.06209	4.72249	4.91159	5.04606	4.54433	4.71451	4.99889	4.68785	4.78954	4.60198	5.04469	5.04037	4.68872	4.92457	4.89046	4.97524	4.47949	4.53802	4.46397	4.6571	5.04856	4.59399	5.07201	4.8497	5.12609	6.40576	4.65062	4.91338	4.65914	4.5305	4.77721	5.88884
ENSG00000025293	0.818064	7.82032	7.71843	7.85564	7.80358	7.79705	7.65017	7.75771	7.35809	7.38032	7.05031	7.86426	7.7718	7.87089	7.90339	7.96536	7.72321	7.0581	6.67158	7.05055	7.09709	6.67396	6.97782	7.06953	7.22998	7.39247	6.62616	7.1133	7.19582	6.59877	6.44459	6.56886	7.18832	6.3007	6.39252	6.50221	6.92185	7.16215	6.74967	7.10098	6.86026	7.20339	7.81553	6.54969	6.7618	6.86371	6.86137	6.61258	7.04822
ENSG00000025423	0.193389	5.56951	5.17169	5.34884	5.24316	5.17751	5.48799	5.21638	4.99795	4.52541	4.66023	5.28807	5.15565	4.91032	5.16846	4.77968	5.03252	5.09778	5.09895	6.27503	7.49803	4.74509	6.13638	4.7423	6.80725	6.13218	5.69198	6.40335	5.28795	4.96568	4.92541	5.0729	6.11324	5.37411	4.83293	10.2098	8.20324	5.55883	5.03634	5.08847	5.33913	7.00706	4.83167	4.78581	4.8139	5.60759	5.84895	5.87954	6.64877
ENSG00000025434	0.521531	6.03101	6.57553	6.76559	6.60812	6.46578	6.67798	6.47119	6.52055	6.30058	6.47519	6.7702	6.68467	6.46205	6.31558	6.4279	6.87754	6.12318	7.1864	6.50404	7.10976	6.74087	6.71974	7.48181	6.6483	6.79239	7.11798	6.52497	6.72189	8.02448	7.45642	6.46699	6.61771	7.97659	7.02938	7.54329	7.32531	6.82504	6.80227	6.00078	7.32426	6.41453	6.62883	6.71999	6.88364	6.87808	7.91141	6.74496	7.76599
ENSG00000025772	0.569471	8.38989	8.66069	8.4498	8.44312	8.5617	8.59484	8.46352	8.4952	8.82518	8.91999	8.81504	8.43891	8.85486	8.51527	8.27062	8.80708	8.75676	9.5825	9.29583	8.94066	9.06619	9.32709	8.89999	9.52665	8.77379	8.5917	8.83453	8.87889	8.91638	9.27409	8.78191	9.38208	8.82927	8.94157	8.91651	8.83852	9.13761	8.87441	8.95439	9.25703	8.83829	8.58679	8.64974	8.6844	9.00598	8.9206	9.13234	10.6259
ENSG00000025800	0.649786	7.62848	7.75077	7.82467	7.69082	7.70509	7.52622	7.75918	7.80218	7.74483	7.59913	7.73387	7.57371	7.64957	7.73026	7.93211	7.67528	7.08242	7.38103	6.97203	7.07597	7.36688	7.14309	6.96524	6.9797	7.52662	6.90967	6.79572	7.36282	7.07009	7.08856	7.32425	6.85087	6.93018	7.07568	7.00262	7.16954	7.01017	7.21973	6.91861	6.80216	7.15154	7.43512	7.12949	7.03358	6.66421	6.72017	6.92367	7.03585
ENSG00000026025	0.857976	11.5878	11.9433	11.5769	10.9501	11.6599	11.1853	11.418	10.6689	13.3254	13.4973	11.4358	11.807	10.9926	10.7841	10.9629	10.6177	12.6408	11.2293	10.8979	12.7617	11.9013	10.1396	12.5701	10.772	8.59457	11.6276	11.0059	11.35	10.1725	12.8339	11.8092	10.7416	10.7004	11.1409	10.1702	13.028	13.3979	11.5852	11.4601	12.1999	12.272	11.295	10.5253	12.2799	12.345	12.5713	11.2697	11.7923
ENSG00000026103	0.385112	5.73791	5.44786	5.40124	4.89465	5.59453	4.99508	5.41018	5.1156	7.28972	7.33423	5.11819	5.14559	4.96833	4.89815	4.89588	4.92929	5.24591	5.79757	5.41395	5.88122	5.3907	5.24654	5.85331	5.52349	5.22467	6.43983	5.70852	5.0874	5.1817	5.55257	5.67126	5.5204	5.91589	5.97846	6.24567	7.64969	6.27693	5.77331	5.31497	6.12006	5.92088	5.59029	5.36591	5.91445	5.81251	6.26903	5.46854	6.05992
ENSG00000026297	0.68748	7.63813	7.89545	8.06058	8.16496	7.71448	7.56074	8.01484	7.71148	7.88659	7.72675	7.81126	7.92356	8.50498	8.63227	8.36189	8.32847	7.63198	7.87934	7.89183	8.09347	8.92788	7.58827	8.1539	7.77742	7.29924	8.50966	8.52244	7.37392	7.5795	7.66198	7.16158	7.70309	8.25956	7.54442	7.64238	8.535	7.66561	7.71825	7.68168	7.65304	7.35306	6.7256	8.9276	7.42484	8.40407	9.22028	8.75991	7.26217
ENSG00000026508	0.368753	6.30592	6.26911	6.27703	5.76035	6.19293	5.83992	6.4766	5.88886	8.27981	8.44033	5.93312	6.13052	6.052	5.98721	5.9844	5.91469	5.95918	6.478	6.12004	7.72664	7.34176	6.06913	7.94242	6.19391	6.17291	6.87043	6.7399	6.11741	6.18424	7.17887	6.45737	6.08087	6.97166	6.47928	6.4521	8.1701	6.3239	9.15971	5.82263	6.8489	7.63796	6.47055	8.25651	8.87652	7.41941	7.70989	6.6414	5.92878
ENSG00000026652	0.385085	6.24315	6.24399	6.37836	6.34227	6.18085	6.5291	6.68254	6.33453	5.81081	6.12754	6.39935	6.37682	6.20835	6.58922	6.3724	6.56516	6.60741	6.43607	7.02866	6.41565	6.43743	7.26282	6.54722	6.58974	6.77306	6.10438	7.61449	6.97405	5.92277	6.54813	6.20812	7.08635	6.14001	6.34131	6.33972	6.65608	6.22586	6.25118	6.70747	6.4072	6.27171	6.14397	6.6983	6.02818	7.95568	6.05518	6.23254	6.74146
ENSG00000026950	0.221914	6.18087	6.76517	6.30984	6.23837	6.14466	6.24504	6.33058	6.28483	6.99832	6.99273	6.34926	6.49061	6.15573	6.12639	6.40932	6.24046	6.76724	7.14294	6.25637	6.86117	7.32859	6.38238	6.95482	6.43964	6.55913	6.7518	6.39319	6.56733	6.46429	6.85013	6.82386	6.39696	7.11388	6.3985	6.81405	7.12042	6.53676	7.12429	6.98926	6.69308	6.39636	6.43436	6.75185	6.44731	6.46044	7.45954	6.84151	6.23442
ENSG00000027075	0.717853	6.25827	6.03579	5.70775	5.8294	5.95223	5.95307	5.94052	5.93864	5.5518	5.62148	5.78766	5.74565	5.9048	5.64191	5.83156	5.6518	5.76214	6.57005	6.22501	7.0065	6.7565	6.36582	6.93961	7.48128	5.89115	6.85762	6.38338	5.98397	5.80541	6.93376	7.1961	6.30861	6.84711	6.77635	6.44526	7.2293	6.71723	7.13006	7.17347	7.44081	7.01698	6.74655	7.53261	7.21024	6.54793	7.59136	6.71706	6.48217
ENSG00000027644	0.492316	5.60917	5.5581	5.81171	5.73672	5.62241	5.67203	5.54993	5.9681	5.73845	5.70703	5.62597	5.60276	5.96023	5.48732	5.89268	5.45332	6.11519	6.13106	5.99208	5.86965	6.34573	6.17353	6.14768	5.99413	5.83206	5.78824	5.87104	6.33606	6.23988	6.40956	6.50625	6.06063	5.91957	6.20003	6.68487	5.72243	5.97469	6.63568	5.64793	6.03143	6.01984	6.28107	6.23704	5.84862	5.85857	6.37904	6.08034	6.11772
ENSG00000027847	0.848446	6.77605	7.14711	7.37607	7.04705	7.16261	6.93843	7.36277	7.06873	7.70014	7.4985	7.30864	6.96449	7.06902	7.11354	7.4071	7.01956	6.68369	6.65339	6.61028	6.56563	6.41045	6.56534	6.34787	6.4247	6.55798	6.4831	6.28593	6.56681	6.72001	6.86091	6.35344	6.42097	6.43827	6.5652	6.28067	6.53877	6.51753	6.20298	6.47215	6.6759	6.46781	6.37157	6.94435	6.26845	6.57069	6.49418	6.3221	6.94512
ENSG00000028116	0.693026	8.72236	8.12273	8.47293	8.13015	8.56071	8.24907	8.4966	8.44375	7.91754	8.03123	8.34532	8.30767	8.2852	8.24282	8.20196	7.98275	8.06536	7.23322	7.17654	7.54616	6.8547	6.86979	7.775	7.21163	6.76385	7.32732	8.23985	6.47284	7.67041	7.06218	7.53819	7.20943	7.18025	7.68786	7.09012	7.36483	7.1124	7.76452	7.8238	7.90033	7.96924	7.47071	7.20019	7.53436	7.69464	7.4268	7.63934	8.20419
ENSG00000028137	0.6728	5.21654	4.83703	4.94551	5.26283	4.97671	5.16647	5.12431	5.10386	5.12003	5.07094	5.0209	5.03498	5.14776	5.05827	5.25403	5.14095	5.36289	5.45407	5.10136	5.86058	7.36916	5.13526	5.83363	5.23946	5.27332	5.33611	5.46177	5.19689	5.53393	5.66879	5.40576	5.21602	5.70845	5.41746	6.13807	7.10856	5.606	5.49902	5.10536	6.03696	5.59967	5.29836	5.34757	5.35406	5.64865	7.45732	5.49642	4.88213
ENSG00000028203	0.935379	5.02165	4.85326	4.96773	4.9047	5.08647	4.93794	5.1201	5.05575	5.05228	4.90918	4.89463	5.04564	4.95086	5.15115	5.24153	5.20708	4.93586	5.00544	4.94112	5.08038	5.00399	4.93428	4.99667	4.77434	5.08441	4.80298	5.05969	5.08768	5.05853	4.90608	4.754	5.02869	4.88623	4.74932	4.9062	5.13956	4.99951	4.97228	5.20247	4.78045	4.57319	4.83068	4.96801	5.08432	4.83559	4.88473	5.06562	4.97041
ENSG00000028277	0.475691	6.21672	6.47425	6.52063	6.29847	6.27456	6.27917	6.2752	6.73218	6.677	6.52115	6.04601	6.27261	6.46861	6.35588	6.53003	6.10925	6.55051	6.12804	5.7913	5.96533	6.72227	5.90677	5.83658	5.96001	6.15404	5.78949	5.84963	5.88796	6.34331	5.92388	6.23478	5.8292	6.05863	5.82488	6.07228	5.91288	6.02898	6.31836	5.81262	5.88048	5.98638	6.27873	6.49173	5.93115	6.15339	6.21176	5.97589	5.91506
ENSG00000028310	0.772631	8.63632	8.41597	8.5702	8.20947	8.87997	8.5904	8.63062	8.48766	8.21537	8.34611	8.74095	8.61944	8.73051	8.65913	8.52803	8.3437	8.6609	8.33253	8.04457	8.40679	8.55852	8.46757	8.64533	7.9936	9.05029	8.03505	8.23792	8.77951	8.50483	8.73471	8.29402	8.08765	8.10985	7.80285	8.13797	8.552	8.4143	8.23944	8.31275	7.9146	8.20702	8.10729	7.95188	8.08426	8.11849	8.0704	8.15123	8.9479
ENSG00000028528	0.613251	6.58459	6.57964	6.52028	6.47859	6.57398	6.72688	6.55879	6.49879	7.0862	7.04418	6.63339	6.45767	6.29537	6.38169	6.40149	6.45033	6.8444	7.08755	6.8535	7.15887	6.91684	6.9912	7.15367	7.05414	6.81838	6.98693	7.51861	6.72532	6.85372	6.7767	7.11915	6.97523	7.00053	7.14377	7.0737	7.49732	6.91209	7.0134	6.99054	6.8537	7.41754	6.88028	6.80212	7.01427	7.60339	7.26122	6.97797	6.96269
ENSG00000028839	0.821697	8.82193	8.55373	8.79502	9.31267	8.9598	9.11198	8.90048	8.08373	7.70711	7.92386	9.40947	9.11033	8.07895	8.45764	8.48287	8.59624	8.62839	6.25426	7.88028	7.15558	6.98493	7.81205	6.55497	7.02486	7.68933	6.52082	7.08164	7.26462	8.33404	6.02915	5.91258	8.03392	7.06824	6.21249	5.68845	6.62247	6.875	6.7373	7.70199	7.2514	7.42705	6.40941	5.75197	7.07923	6.71982	6.86293	7.05155	10.4558
ENSG00000029153	0.726682	6.11555	5.89849	5.84803	5.98324	5.9237	6.00171	5.9791	6.03356	6.28784	6.19912	5.92704	6.02707	6.19772	6.05917	5.56497	5.97499	5.53691	5.88403	5.89086	5.81463	5.77811	5.9287	5.57587	5.91201	5.71527	5.6466	5.90499	5.88285	5.73792	5.60953	5.88286	6.07589	5.94847	5.7101	6.58711	5.83819	5.59791	6.16358	5.5838	5.87574	5.70196	5.79673	5.83111	5.95097	5.69415	5.75475	6.0175	5.89862
ENSG00000029363	0.890245	8.63119	8.07027	7.9338	8.02022	8.46033	8.36176	7.77417	8.11092	7.91024	7.64127	8.43187	8.20953	7.74945	7.97889	8.21951	7.80386	7.12918	5.59937	6.31409	6.50888	5.24259	5.90193	7.00037	6.16303	5.76625	6.41583	6.27671	5.61212	6.18836	6.34136	6.00098	6.38259	6.16888	6.3379	6.2882	6.31439	6.71341	6.69961	6.80589	6.56774	6.84715	6.46314	5.36391	6.97653	6.19449	6.59517	6.22326	6.66769
ENSG00000029364	0.811219	5.91652	5.71383	5.80485	5.66197	5.71943	5.74172	5.82962	5.82138	5.79414	5.87974	5.7174	5.66523	5.84818	5.71768	5.82063	5.79497	6.0314	6.39457	6.31787	6.26452	6.2506	6.28746	6.28991	6.40954	6.11492	6.45524	6.30624	6.4109	6.08986	6.385	6.5347	6.23738	6.33066	6.47993	6.19242	5.96707	6.15245	6.25309	6.05709	6.15862	6.26292	6.58515	6.56909	6.28976	6.21676	6.26346	6.26576	6.3789
ENSG00000029534	0.618749	5.47751	5.43471	5.60645	5.48374	5.49422	5.27561	5.50271	5.4342	5.37769	5.48422	5.29472	5.40632	5.37578	5.28191	5.44455	5.4292	5.60221	6.25382	6.05618	5.91349	7.83981	6.66997	5.6779	6.08451	7.7467	5.82521	5.73092	6.04373	8.12371	5.98154	7.06867	6.11945	5.87011	6.03129	6.03951	5.70402	5.58058	6.06187	5.84317	5.92098	6.97944	7.67505	6.21019	5.56623	6.12154	5.68572	6.23418	5.86321
ENSG00000029993	0.917386	11.3108	10.8928	10.8649	11.2281	10.7646	11.0227	10.7382	10.7368	8.3776	8.17346	11.1611	11.1729	11.7326	11.5481	10.8119	11.3385	10.9302	7.37437	7.4735	6.72099	8.02238	7.54212	7.42833	7.37161	7.23996	7.37589	6.96327	9.0323	7.92559	8.47961	7.07179	7.58369	6.9427	7.01771	7.68515	6.88713	6.81177	7.35903	6.72403	10.366	7.05677	7.25314	7.14274	7.33365	7.27978	7.57043	6.99735	7.06118
ENSG00000030066	0.736108	6.1093	5.49175	5.91859	5.5444	6.29248	5.96579	6.01006	5.57826	5.1049	4.86903	6.19688	6.03373	5.6967	6.02618	5.8482	5.42226	5.19464	5.15934	4.85865	5.15508	5.18144	4.87176	5.18062	4.95144	4.90939	5.07424	5.04392	5.16625	5.38816	5.21283	5.07453	4.96445	5.08418	5.30074	5.01013	5.23275	5.20905	5.30949	5.26786	5.63949	5.19039	5.13386	5.06597	5.17826	5.07225	5.13777	5.21344	5.34019
ENSG00000030110	0.29154	6.41337	6.7698	7.04253	6.88896	6.95128	6.61878	6.98183	6.83589	6.82401	6.81062	7.13546	6.94534	7.01908	6.90792	7.19907	6.91186	6.50558	7.65543	6.70092	6.73492	7.2942	6.78328	6.4587	6.6879	7.06845	7.16022	6.60698	6.8563	7.35502	7.6017	6.94123	6.39748	7.63608	6.72736	7.29076	7.04244	6.91234	6.85433	6.69689	6.48781	6.66001	6.87824	7.34224	6.67187	6.46064	6.81231	7.34798	6.43376
ENSG00000030304	0.216199	4.52315	4.60595	4.68733	4.59958	4.52422	4.54922	4.53195	4.56048	4.71436	4.73498	4.56197	4.54553	4.62056	4.65607	4.70673	4.5656	4.81329	4.95182	4.9573	4.62651	4.97588	5.05838	4.73795	5.10259	4.93634	4.78555	4.85668	4.84772	4.86616	4.84942	5.52926	4.81161	4.95036	4.92131	4.81941	4.70087	4.72659	4.83659	5.04679	4.73629	4.96223	5.36672	5.29392	4.72125	4.82083	4.93678	4.8164	4.79763
ENSG00000030419	1.05372	5.28888	5.58414	5.62216	5.82911	5.39287	5.73096	5.4962	5.7915	5.57217	5.58236	5.58035	5.62636	5.72117	5.7458	5.6203	5.80556	5.93245	6.30366	6.40426	5.75241	6.55755	6.18234	5.89565	5.97088	6.11242	6.37122	6.01652	6.1204	5.79513	6.04151	6.45072	6.01095	5.89135	5.93207	6.67385	5.72075	5.87576	5.95895	6.09898	5.89464	5.99292	6.10075	6.42843	6.06566	5.92022	6.02288	5.95671	6.14886
ENSG00000030582	0.55705	9.19656	9.74042	9.47821	9.69812	9.46108	9.58865	9.62525	9.39988	10.5783	10.6221	9.60108	9.37812	9.53589	9.5005	9.72233	9.47771	9.05409	9.62227	8.25145	9.63351	10.5103	8.32575	9.33524	8.44484	8.17591	10.508	8.51166	8.09343	8.6188	10.1691	9.05752	8.15833	9.47857	9.62172	9.03013	11.0951	9.06631	8.68804	8.98051	10.082	9.01632	8.40064	9.77219	9.65183	8.8475	10.6125	9.07316	8.84592
ENSG00000031544	0.230555	5.24837	5.34011	5.26031	5.21787	5.15276	5.03806	5.15976	5.35534	5.24018	5.18129	5.13392	5.24969	5.23886	5.26857	5.23549	5.20863	5.27572	5.51644	5.28605	5.13202	5.48687	5.37042	5.17461	5.14122	5.20634	5.30172	5.20348	5.27447	5.37101	5.13194	5.39568	5.13698	5.44952	5.31943	5.49628	5.23156	5.06602	5.33816	5.23219	5.2633	5.15475	5.45474	5.71404	5.07416	5.07854	5.29682	5.34021	5.19634
ENSG00000031691	0.654667	5.88528	5.19422	5.51127	5.1796	6.21713	5.41481	5.42309	4.98828	4.34073	4.38407	6.24044	5.78874	5.2165	5.38141	4.91507	4.76157	4.83117	4.17453	4.25674	4.41203	4.29808	4.32387	4.36204	4.25413	4.30508	4.35982	4.66273	4.16107	4.5892	4.31332	4.42385	4.34379	4.25086	4.36077	4.4334	4.21303	4.32689	4.24657	4.34693	4.64036	4.3578	4.25045	4.11253	4.2515	4.45261	4.45212	4.13749	4.34702
ENSG00000031698	0.589479	10.2277	10.2051	10.5012	9.99481	10.2795	10.1326	10.5533	10.2035	9.89956	10.1101	9.61071	9.73179	9.78336	9.95882	10.0509	9.7717	10.07	9.00866	9.27936	9.46486	8.32106	10.1191	9.32921	9.09957	9.83943	9.17642	9.0772	9.73561	9.0138	8.88652	8.91182	9.63159	9.04395	9.09446	9.32062	9.61904	9.85248	9.48666	9.40621	9.51838	9.52509	8.78105	9.24533	9.61584	9.29699	8.9001	9.33142	9.07383
ENSG00000031823	0.789977	7.05811	7.3826	7.39908	7.4203	7.36028	7.40076	7.32016	7.44506	7.2102	7.31915	7.44973	7.27569	7.28758	7.43773	7.67906	7.15302	7.20554	7.29833	6.8854	7.10578	6.98339	6.86102	6.88711	6.73278	7.30986	6.73161	6.89105	7.17214	7.02296	7.44038	6.86608	6.88919	6.74849	6.69043	6.74405	6.82505	7.04411	6.87025	6.81644	6.65691	6.74742	6.87027	7.15807	6.85364	6.91241	6.83705	6.78789	7.19479
ENSG00000032219	0.692912	5.4612	5.5402	5.2706	5.40878	5.45197	5.55532	5.40576	5.36502	5.8818	5.71519	5.49632	5.50752	5.41071	5.50094	5.39679	5.53871	5.63421	5.36907	6.10487	5.99795	5.10566	5.50872	6.36253	5.82537	5.29613	5.80243	6.03932	5.30198	5.8486	5.52104	5.44814	6.43386	5.56112	5.51615	5.53631	5.85425	5.55271	5.58932	6.40072	5.72353	5.68785	5.41466	5.69033	6.03191	5.8761	6.08036	5.98645	5.53031
ENSG00000032389	0.690587	8.67044	8.57535	8.82431	9.0544	8.71054	9.01648	8.63176	8.87666	9.03234	8.82316	9.07455	8.74948	8.98823	8.95724	8.14281	8.85217	8.55068	7.35036	8.07759	7.30731	7.67859	8.44537	7.11589	8.23302	8.31751	7.20855	7.46201	8.26338	7.39387	7.65765	7.05137	8.21611	7.12958	7.77421	6.76056	7.2746	6.71194	7.11671	8.363	7.297	7.318	6.8372	7.19123	7.31397	7.65107	7.79702	6.9029	7.6642
ENSG00000032444	0.628594	7.36426	8.09151	7.75151	7.94674	7.81415	7.71406	8.0515	7.86673	8.43665	8.36462	8.13282	7.83145	7.82766	8.37644	8.43819	8.33161	7.33342	8.58041	8.98429	7.99127	8.37268	9.08347	7.75549	8.23112	9.16823	7.82233	8.67772	8.68861	9.08675	8.42134	7.98134	8.56147	8.31756	8.35119	7.6436	9.40086	8.13172	7.47034	8.11905	7.46672	8.17545	8.37542	7.95179	7.6247	8.77145	8.47627	7.47346	8.89696
ENSG00000032742	0.750039	6.52559	6.23868	6.53462	6.43131	6.1349	6.29121	5.97156	5.89884	7.11135	6.84424	6.27087	6.49405	6.43412	6.19699	5.8918	6.42046	7.22035	6.062	6.98356	6.9009	6.23907	6.62746	7.2882	7.32456	6.24438	6.94427	7.52052	5.68615	6.33004	6.60206	6.68038	7.02177	7.01068	6.98862	7.14046	6.95782	7.10657	6.55539	7.95634	6.41244	6.88699	6.50617	6.19381	6.35751	7.04132	6.51438	6.58095	9.76973
ENSG00000033030	0.614473	8.94599	8.34876	8.87494	8.39386	8.69932	8.67354	8.71756	8.06465	7.19534	6.87363	8.1195	8.21509	7.97278	8.28862	8.70586	7.97422	7.84348	6.31624	6.28932	7.05265	6.54169	6.26734	7.57766	6.27555	6.94113	6.86823	6.92944	6.64789	7.69352	6.76671	6.63995	6.48957	6.99048	6.55771	6.57286	7.19189	7.04502	6.78552	7.32495	7.06251	7.05379	6.67122	5.91613	7.71834	6.88889	7.0264	7.23957	7.06217
ENSG00000033050	0.653521	6.56248	6.76184	6.65575	6.79177	6.85481	6.71621	6.82846	6.9213	6.94893	7.05892	6.68849	6.92286	6.54323	6.71937	6.76504	6.33581	6.43876	6.47373	6.40978	6.39417	6.53719	6.67869	6.28705	6.30458	6.69884	6.3953	6.17045	6.51065	6.54907	6.62678	6.42889	6.34869	5.97616	6.49844	6.377	6.34257	6.94128	6.29022	6.3653	6.20501	6.77553	7.10847	6.28402	6.47826	6.30996	6.53675	6.25642	6.4341
ENSG00000033100	0.616514	8.0883	8.16393	7.93958	7.84146	8.05135	7.6932	8.06926	7.62524	9.69354	9.57215	8.14296	7.93645	7.94911	8.01279	8.04263	7.5892	7.96533	8.52984	7.95989	7.88851	8.44349	7.82873	7.7872	7.53484	7.8272	7.97129	7.57258	8.04467	8.20257	8.36715	7.95506	7.78119	8.0127	7.86432	7.99561	8.11976	8.66202	8.10858	8.95973	8.39927	7.88899	7.88359	8.01998	7.78716	7.66068	8.30204	7.8743	7.6219
ENSG00000033170	0.190295	7.31095	7.71787	7.34218	7.61916	7.40698	7.20859	7.05876	7.13173	7.9259	8.09777	7.21911	7.47372	7.40171	7.35105	7.49825	6.74661	6.56697	6.81231	7.43368	7.0764	6.62432	7.65746	7.78375	7.87718	7.67638	7.23582	8.73598	7.54029	6.842	6.60727	6.9186	7.64564	7.48841	6.64681	6.71716	7.02817	6.99352	6.84481	7.08856	8.05355	6.87687	6.60966	7.90351	6.75089	8.63458	7.09594	8.44749	7.5061
ENSG00000033178	0.65925	5.47086	5.32251	5.2086	5.40627	5.44981	5.47126	5.52423	5.54455	6.4229	6.20174	5.40012	5.30573	5.26334	5.30053	5.28137	5.72101	5.2924	5.59168	5.34134	5.47931	5.3628	5.38244	5.48684	5.58748	5.26565	5.51815	5.61642	5.40778	5.53595	5.56832	5.4345	5.38498	5.67607	5.55785	5.69565	5.52907	5.38758	5.37381	5.77468	5.57579	5.44281	5.44053	5.38066	5.74526	5.63812	5.50279	5.49777	5.64033
ENSG00000033327	0.412068	8.31852	8.02228	7.22211	7.846	8.02516	7.87544	8.00406	7.31304	7.64039	7.59806	8.27888	8.12872	8.08589	7.98415	7.26652	7.66648	8.40129	7.7612	8.75737	7.95669	8.17793	8.88894	7.86717	8.93059	8.10197	7.69144	9.52527	9.02361	7.09321	8.00186	7.79196	8.80776	8.00537	7.21608	7.45853	8.80599	8.56301	7.757	7.62629	8.09406	7.91576	7.42869	7.32977	7.82022	9.21063	8.38629	8.13841	7.43311
ENSG00000033627	0.739693	7.45706	7.96212	7.67333	7.79919	7.54224	7.65234	7.74278	7.80169	7.64562	7.63296	7.63602	7.63086	7.57864	7.4702	7.83727	7.64622	7.99187	8.20886	9.69932	8.27105	8.59542	9.55139	8.36324	9.07893	9.63169	8.37283	8.92453	9.47802	8.67038	8.36276	8.08048	9.3735	8.29529	8.53216	8.63318	8.41272	8.22696	8.1141	8.96674	7.96168	8.09189	8.07655	7.7595	8.41343	9.35021	8.47678	7.94076	8.4841
ENSG00000033800	0.752557	7.32586	7.30804	7.11394	7.70524	7.44852	7.63294	7.33377	7.30612	7.1613	7.08377	7.81291	7.81477	7.62414	7.52891	7.48038	7.69855	7.95654	6.99725	7.75775	8.01339	7.29016	7.3781	7.61907	7.40529	7.16853	7.40584	7.36061	6.96729	7.07687	7.3032	7.29236	7.76424	7.11685	7.12526	6.76835	7.56952	7.74053	6.86403	7.61713	7.22124	7.75398	7.06094	6.75634	7.44877	7.2335	7.76003	7.7774	7.68233
ENSG00000033867	0.162473	4.9916	5.08681	4.9478	4.85705	4.95981	4.89593	4.94778	4.78535	4.90675	4.91739	4.90821	4.97213	5.06939	5.06595	4.90608	5.0987	4.95545	4.63278	4.68438	4.97137	4.66961	4.901	6.11512	4.74596	4.84547	4.66199	4.66438	5.3905	4.63629	4.78934	4.64728	4.71041	5.30208	5.09885	4.6925	4.66525	4.71472	4.84104	4.62306	4.81163	5.02541	4.66942	4.45737	4.95018	4.64014	4.81458	4.75636	4.98394
ENSG00000034053	0.264937	6.6553	7.05805	6.66097	6.83087	6.95239	6.96675	6.86826	6.80438	6.31542	6.52369	7.55747	6.82247	6.7918	6.96388	6.88866	6.58214	8.07925	6.88601	9.1928	6.76767	7.10818	9.27319	6.76805	8.22882	9.71948	6.66685	8.67925	8.91878	6.86742	7.29426	6.88551	9.42472	7.02444	6.33024	6.81613	6.71349	6.80305	6.85098	6.97516	6.74942	6.71522	7.02884	6.81317	6.66144	8.65148	7.3655	6.55148	6.84289
ENSG00000034152	0.79478	7.06505	7.68447	7.42837	7.56837	7.53446	7.59894	7.462	7.34509	8.42189	8.21433	7.68487	7.33097	7.48057	7.47574	7.76002	7.48517	7.2589	7.65983	6.38637	7.24113	9.82619	6.78819	7.63265	6.54572	7.71053	7.50293	6.3942	6.8007	9.22115	7.9843	8.14341	6.2825	8.04894	7.11787	8.41797	8.50658	7.57546	7.77309	7.40492	7.75306	7.52564	8.02606	7.85661	7.97735	6.71468	7.96488	7.61099	6.59694
ENSG00000034239	0.6843	5.90503	5.86463	5.92247	5.67874	5.51822	5.69482	5.57202	5.76816	5.71775	6.12989	5.71734	5.65387	6.0045	5.76858	6.00932	5.91753	6.16314	6.61118	6.76249	6.71128	6.74467	6.96065	6.67004	7.05394	6.38509	6.50375	7.4484	6.99506	6.58926	7.1554	6.62152	6.87819	6.50715	6.5053	6.84315	6.93555	7.0625	6.86687	6.75343	6.59023	6.56921	6.55092	6.21828	6.6129	7.10254	6.60201	6.61134	6.80184
ENSG00000034510	0.794329	11.5974	11.9956	11.9475	11.8469	11.8118	11.7252	11.7178	11.7459	13.0697	13.0951	11.9899	11.7231	11.7748	11.909	11.8901	11.627	12.8334	11.2247	12.3204	12.2855	11.912	12.6364	12.3028	11.7742	11.1879	12.5764	11.1208	12.8896	11.0118	13.0931	11.3397	12.1041	12.433	11.7855	10.8217	12.8804	13.169	11.3273	11.0737	12.8599	12.4305	10.2545	11.3481	11.8287	11.5267	13.0363	11.7318	12.0895
ENSG00000034533	0.659121	7.32663	6.60722	6.90361	7.16319	6.72457	7.04995	6.58837	6.74426	7.048	6.56515	7.184	6.69692	6.65559	6.83611	5.9199	6.86695	6.84049	6.51903	6.45461	6.5137	6.7874	6.43037	6.57989	6.39163	6.42008	6.9454	6.95468	6.51465	6.90103	6.47028	7.06694	6.50272	7.13072	6.75282	6.63961	6.61229	7.04415	6.86406	6.83654	6.80756	6.58584	7.07332	6.85817	6.30911	7.20016	6.99815	6.5599	7.03269
ENSG00000034677	0.83093	4.91113	4.71741	4.91708	4.99708	4.67809	5.24814	4.65693	4.77034	5.28714	5.13048	4.92489	5.083	5.6423	5.06853	5.01661	4.92588	4.95647	5.14099	4.85095	5.10164	5.08907	4.8354	5.3761	4.76402	4.86536	5.09408	4.74938	5.59763	5.34089	5.31919	5.11442	5.08628	4.8027	5.39322	5.08707	4.84882	5.17532	5.19809	4.83484	5.35112	4.86094	5.1325	5.36259	5.58236	4.86686	4.91734	4.81145	6.04755
ENSG00000034693	0.74861	7.11548	6.32772	6.35397	6.26133	6.88687	6.57098	6.66198	6.45511	6.99631	6.76946	6.63231	6.50866	6.53395	7.00667	6.15398	6.74876	6.0423	6.40438	6.02325	6.03495	5.5208	5.7381	6.30768	5.83789	5.44569	5.47786	6.30409	5.60397	6.11923	5.62226	6.01886	6.18599	5.51351	6.26518	6.39599	6.16733	6.04766	5.56937	6.5937	6.94354	6.01476	5.88593	5.32622	6.66174	6.01075	5.67488	6.13329	6.69308
ENSG00000034713	0.790353	10.3053	10.0041	9.90913	10.3049	10.0075	10.2259	9.88834	9.98822	11.1059	11.0088	10.5055	10.1267	10.1704	10.1934	9.88087	10.0454	11.1224	10.6384	11.0219	9.93226	10.5207	11.2477	10.1289	11.086	11.0691	9.6878	11.2493	10.9783	9.94256	9.18022	10.4744	11.0307	9.15828	9.7131	8.93992	10.0602	9.92675	8.82842	10.9823	10.4482	10.0792	10.2365	9.47998	10.1615	11.2474	9.96922	9.81186	10.0472
ENSG00000035115	0.704836	9.05271	8.62961	8.35194	8.37463	8.42533	8.79219	8.31812	8.20664	8.81811	8.85671	8.0935	8.36661	8.68154	8.91357	7.64479	8.41792	8.14519	7.75983	8.56054	9.18104	5.626	7.73744	10.6191	8.60152	7.30805	9.04426	9.45278	7.13106	8.48091	8.13912	6.82751	8.93727	9.50667	9.17819	6.41202	9.01539	8.08673	9.94837	9.96014	8.19689	8.32572	6.13051	8.61176	9.74861	8.89302	7.16761	10.786	8.14413
ENSG00000035403	0.78292	8.31353	8.2639	8.38796	8.24386	8.2967	8.20633	8.18999	8.21481	8.19073	8.2955	7.84065	7.94136	8.03867	8.0347	8.04664	7.92297	7.28424	6.90159	6.55455	9.35202	7.61933	6.24159	7.65936	6.66674	6.42308	7.88806	6.59912	6.40647	7.07044	7.13627	8.11936	6.61514	7.49429	7.40583	7.13819	7.36013	8.1538	7.23553	7.06028	7.39724	8.85594	7.97936	6.8134	7.15829	6.8159	7.51137	6.98936	7.28432
ENSG00000035664	0.765737	6.43821	6.64246	6.63949	6.79283	6.45896	6.51569	6.50611	6.854	6.91166	6.7862	6.51461	6.56871	6.50405	6.61622	6.68975	6.68219	6.69171	6.9487	6.81853	6.68973	7.13984	7.07218	6.98538	6.88758	7.12	7.10129	7.31504	6.69371	6.70109	7.07283	7.39984	6.68869	7.70184	6.60808	6.76338	7.17914	6.78128	6.56363	6.42446	6.48992	6.60858	6.68705	7.12085	6.98417	6.94494	6.54904	7.08239	6.5656
ENSG00000035681	0.712567	8.796	8.44145	8.41207	8.37652	9.13949	8.44031	8.84508	8.3888	9.3329	8.81575	8.97548	8.59259	8.56296	8.55248	9.19912	8.34347	7.47288	7.28754	7.41702	7.93887	6.81299	6.57685	7.45905	7.74186	6.90755	7.16053	7.32509	6.7242	6.74762	6.45757	7.23695	7.57566	6.70928	7.02315	6.32139	7.81211	7.55455	8.19683	7.93555	7.69655	8.01148	7.49206	7.08735	8.01065	7.63709	7.60773	7.30505	6.50849
ENSG00000035862	0.680899	7.54327	7.46595	7.69065	7.25123	7.58119	7.17329	7.67317	7.2882	9.5822	9.57809	7.9458	7.31207	7.34711	7.43492	7.90055	7.27643	7.1864	8.36364	7.71735	8.31033	8.5857	7.4233	7.77217	7.87423	7.31115	8.03061	8.29416	8.07598	7.8179	8.18518	7.70049	7.72186	7.72904	7.54608	7.22663	8.6938	8.81364	8.10661	8.74377	10.3413	7.62976	7.38775	8.13429	7.61858	8.47061	8.62839	7.55681	7.93769
ENSG00000036257	0.764121	7.00551	6.80791	6.77665	6.83418	6.96854	6.86581	6.90396	6.51222	6.56163	6.38824	7.01066	6.96132	6.79402	6.79784	6.56975	6.97778	6.95954	5.21208	6.54217	6.07669	4.99688	6.2395	6.27786	6.28087	5.99939	6.22797	6.21488	5.84349	5.98667	5.56489	6.04538	6.60376	5.9351	6.03999	5.91275	6.21989	6.56901	5.85744	6.24572	6.21517	6.29446	7.12372	5.1054	6.30849	6.0349	6.08925	6.08622	7.43062
ENSG00000036530	0.795216	5.59883	5.69952	5.7673	5.98654	5.67573	6.10802	5.77329	6.21113	5.61451	5.76728	5.87056	6.07217	6.01118	5.94195	5.88699	6.02987	6.73918	7.09025	10.8729	6.14083	6.49471	10.8875	6.22236	11.8377	8.96709	6.0679	8.96348	8.74078	6.14605	6.61725	6.55528	10.8562	6.42424	6.52834	6.16751	6.05685	6.26521	6.56375	9.1414	5.82065	6.05451	6.8418	6.67984	5.86606	8.75363	6.3747	6.00393	6.32322
ENSG00000036549	0.790842	9.17153	8.83485	9.09957	8.62091	9.00873	8.902	8.66973	8.457	8.53781	8.48163	8.87246	8.92709	8.09877	8.46154	7.98427	8.57009	8.13835	6.31838	7.14468	7.64918	5.55171	6.56786	8.11357	7.38397	6.08019	6.82814	7.85382	5.9906	6.84517	7.16194	6.37809	7.24863	7.06114	7.09649	6.84309	7.12798	7.331	7.28679	8.0298	7.64476	8.02078	7.6111	6.28922	7.72676	7.48096	7.01925	6.98964	6.70612
ENSG00000037042	0.643623	5.27588	5.4788	5.4291	5.29597	5.40603	5.37058	5.52314	5.36275	5.9345	5.78474	5.40852	5.38251	5.22208	5.25921	5.78238	5.59458	5.54348	6.00416	7.3395	5.78441	5.47319	7.52538	5.75193	7.32524	7.00439	5.45788	6.4952	6.25837	5.24176	5.73934	5.88401	7.53992	5.35041	5.62549	5.17363	5.38168	5.39573	6.2102	6.64016	5.20327	5.4828	5.40449	5.58554	5.45795	7.12225	5.38642	5.98214	5.69451
ENSG00000037241	0.777686	9.53053	9.30255	9.84307	9.73761	9.7199	9.75232	9.57809	9.40281	9.81123	9.79935	10.1529	9.82661	9.8653	9.92496	9.62802	9.54451	9.55862	7.59795	7.63453	7.80054	7.31212	7.98365	7.79659	7.5525	7.33057	7.45239	7.23819	8.36995	8.43927	7.24678	8.13953	7.67354	7.44305	7.92093	7.98059	8.15674	8.5815	7.04238	7.90744	8.43094	8.48981	7.65354	7.53188	7.82764	7.4858	7.75262	7.04186	9.38025
ENSG00000037280	0.913954	4.83997	4.90358	4.8743	4.72447	4.94314	4.85738	4.99699	4.89896	4.73984	4.75644	5.07006	5.14598	4.93958	4.70421	4.96227	4.93393	4.79618	5.16267	5.07851	5.11326	5.33988	4.76966	4.95064	5.08019	4.96382	5.08858	4.85415	5.1089	4.96506	5.6116	5.01563	4.98266	5.19007	5.0435	5.46456	5.02338	4.90897	5.26653	5.13718	5.25138	4.98346	5.11119	4.9208	4.85939	4.95541	5.01759	4.91981	5.27099
ENSG00000037637	0.69218	7.68314	7.54363	7.73819	7.66909	7.80302	7.58702	7.72537	7.33198	7.28861	7.26672	7.88045	7.67023	7.49273	7.62638	7.77704	7.40332	7.7909	7.75796	7.73564	7.84224	8.06147	7.78675	7.76676	7.70841	8.38268	7.76541	7.59766	8.32077	7.60721	7.72326	7.74587	7.73062	7.36223	7.46751	7.45678	7.58828	8.07564	7.55437	7.57692	7.56979	7.57815	7.95086	7.77112	8.17092	7.46717	7.65849	7.64487	7.60846
ENSG00000037749	0.870497	6.83122	6.58883	6.7289	6.5847	6.88219	6.56317	6.75031	6.57131	6.79084	6.66539	6.57929	6.59948	6.65565	6.62014	6.64018	6.42254	6.92336	6.18884	5.93109	6.23801	6.01949	6.16437	6.43815	5.83423	6.25722	6.28613	6.1423	6.6629	6.37692	6.09823	6.42843	5.95539	6.37745	6.38857	6.19292	6.52087	6.43262	6.16176	6.24454	6.56307	6.51417	6.38739	6.20372	6.56119	6.13464	6.52029	6.30544	5.97424
ENSG00000037965	0.45885	6.37438	6.35911	6.67411	6.20057	6.25446	6.3229	6.51221	6.71421	6.54789	6.45154	6.33805	6.23988	6.11928	6.2892	6.57692	6.19394	6.35082	6.53072	6.47772	6.09271	6.66478	6.38486	6.19082	6.468	6.35742	6.3319	6.41289	6.26324	6.91438	6.13942	6.84094	6.1638	6.30144	6.54092	6.45686	6.46691	6.41195	6.66482	6.06385	6.09331	6.17645	6.91104	6.72828	6.0513	6.94314	6.46567	6.03992	6.58998
ENSG00000038002	0.680871	6.71063	6.32025	5.96991	5.86781	6.36902	6.24961	6.41161	5.94291	8.06928	7.70243	6.07982	6.11123	6.56521	6.66627	6.10292	6.72926	5.61419	5.67094	5.83654	5.69399	5.82496	5.17487	5.89986	5.89902	5.13985	5.9921	6.72687	5.24269	6.21474	5.53263	5.36603	5.90311	5.62036	5.99302	6.15103	6.14119	5.56492	5.82885	6.07494	6.21538	5.8489	5.39851	5.90763	6.08949	6.38791	5.96192	6.08285	6.54559
ENSG00000038274	0.386547	10.337	9.7714	9.85047	9.65437	10.1038	9.68384	9.88612	9.9763	9.5389	9.47968	10.4824	10.1161	10.0071	10.2037	9.25962	10.2508	10.2554	9.0935	9.0877	9.5156	9.71022	9.49094	9.6494	9.13837	8.88972	9.68306	8.73561	8.62784	9.38268	8.2641	9.08108	9.30482	9.60113	9.29614	8.4666	9.61925	8.88374	8.48893	8.91879	9.74559	9.39374	9.19115	8.79891	9.58549	8.78026	9.8274	9.61507	8.93354
ENSG00000038295	0.598071	3.83556	3.95793	3.94242	3.93313	3.79661	3.9686	3.72208	4.00926	3.98018	4.07872	3.83478	3.82516	4.07789	3.93811	3.78397	3.88497	3.97415	4.07778	4.01531	4.02116	4.04056	4.09428	3.98576	4.06216	4.36246	4.02997	4.01009	4.13924	4.15585	4.01141	4.0821	4.08424	4.49245	4.01489	4.11507	4.02422	3.99663	3.97353	3.93138	4.18191	4.03666	4.0454	4.02749	3.94891	4.07272	4.0119	4.02709	4.01593
ENSG00000038358	0.560467	7.71435	7.98402	8.30695	7.5847	7.92018	7.44964	8.2126	7.34634	7.47867	7.47696	8.00457	7.52624	7.58302	7.99387	8.2363	7.23074	7.822	7.72911	7.45821	7.3617	7.69261	7.70082	7.69263	7.64077	8.36593	7.48977	7.39824	8.05834	7.51952	8.39314	7.60031	7.38409	7.49321	7.13504	7.37696	7.84166	7.77177	7.32684	7.82932	6.99614	7.61084	7.99933	7.76019	7.45615	7.18151	7.40589	7.35891	7.8995
ENSG00000038382	0.941686	5.95209	5.97296	5.91152	5.90156	6.02945	5.93946	6.0721	5.85904	6.3784	6.26929	5.79182	5.80738	5.80439	5.7703	5.87246	5.69723	5.98347	6.23519	6.53691	6.33558	6.2238	6.37633	6.62286	6.34969	6.32313	6.38118	6.1851	7.32388	5.97967	6.35384	6.24699	6.54016	6.02134	6.00453	6.14748	6.05556	6.57612	6.26567	6.32524	6.18978	6.45959	6.20798	5.92634	6.14505	6.2082	6.32719	6.30798	6.21506
ENSG00000038532	0.76615	6.02433	5.89044	5.93122	6.10448	6.23919	5.97697	6.02263	5.91445	6.22198	6.23834	6.35761	5.86743	6.00905	5.75699	6.42058	6.00561	6.64471	6.84672	7.59245	6.70389	6.69831	7.22993	6.7128	6.82925	7.49941	6.70251	6.92913	7.12251	6.55324	6.98407	6.8365	7.02281	6.82363	7.13534	6.27053	7.01118	6.92401	6.2747	6.98187	6.25023	6.97156	6.81313	6.51257	7.16878	7.47828	6.59261	6.8033	7.65699
ENSG00000038945	0.378319	4.86987	4.9545	4.8983	4.88839	4.89814	4.81505	4.95502	4.88316	4.9511	4.95276	4.91504	4.80452	4.94187	4.84661	4.86766	5.01738	5.0822	5.30369	5.14562	5.24978	5.35139	5.15932	5.15326	5.1287	5.10658	5.30068	5.24033	5.0996	5.2456	5.23888	5.28259	5.17301	5.401	5.3209	5.39266	6.73092	5.37649	5.39603	5.09525	5.55815	5.1352	5.23528	5.21956	4.98734	5.28704	5.36903	5.10333	5.08624
ENSG00000039523	0.579699	8.21493	8.41617	8.21228	8.16978	8.13037	8.11294	8.27894	8.41167	8.64995	8.87784	8.19613	8.19095	8.45799	8.33652	8.30896	8.44027	8.71705	9.67195	9.80033	9.42899	9.63987	9.6145	9.23697	9.97341	9.71626	9.15042	9.39374	10.142	9.28344	9.8087	9.42388	9.70825	9.1842	9.63986	9.09762	9.72674	9.68008	9.52976	9.55216	9.32533	9.37459	9.36857	9.24459	9.18949	9.67556	9.74617	9.28314	9.36612
ENSG00000039537	0.223963	5.21467	5.80936	5.5702	5.49628	5.22537	5.39909	5.37722	5.56479	5.28706	5.56301	5.19817	5.44432	5.44435	5.22425	5.48384	5.27238	6.26555	6.90212	6.56602	6.7438	6.42267	6.61335	6.31421	6.97047	6.47592	6.82491	6.70148	6.50026	7.5151	6.79227	7.98354	6.52751	6.90243	7.73677	11.7518	6.47921	7.01064	8.65193	6.39046	6.23397	6.58581	7.30327	6.97932	6.36561	6.53897	6.49967	7.07427	6.93019
ENSG00000039560	0.791323	9.93717	9.25688	9.18526	8.9349	9.78283	8.9491	9.41484	8.97637	9.73056	9.9086	9.02304	8.71692	8.33152	8.5956	8.26986	8.05561	8.88325	6.2205	6.18518	7.95485	5.69483	5.8964	6.79035	6.59425	6.38614	6.55541	7.00441	6.26354	7.1673	7.37244	6.47016	6.1279	6.32582	6.89349	7.10868	8.65156	7.751	7.48811	6.67206	8.9595	7.97701	5.66391	5.68446	7.45222	8.00542	8.19746	6.53459	6.78677
ENSG00000039600	0.474929	4.16422	4.24912	4.37948	4.29338	4.21289	4.16761	4.21672	4.32564	4.29181	4.14695	4.14069	4.20448	4.34696	4.19459	4.29416	4.30046	4.3534	4.18564	4.21398	4.19598	4.38105	4.31424	4.17629	4.19751	4.22945	4.25941	4.24641	4.36841	4.37316	4.28781	4.20179	4.16988	4.29436	4.17714	4.33898	4.33111	4.18065	4.289	4.28781	4.40101	4.24255	4.24198	4.20712	4.21131	4.16143	4.26336	4.09971	6.44709
ENSG00000039650	0.784482	7.095	7.75888	7.80599	7.78378	7.91441	7.57747	8.12527	7.42983	8.12462	7.83615	8.28744	7.47852	7.79644	8.01008	8.28802	8.2567	7.36182	7.69953	6.99533	6.37575	6.95348	6.69772	6.52616	6.81379	6.44174	6.52139	6.26415	6.66587	6.80313	7.63378	6.65554	6.5691	6.38729	7.0829	6.65726	6.40406	6.57759	7.02952	7.71413	6.27493	6.54285	6.65825	7.37736	6.21473	6.58883	6.91819	6.66086	7.05501
ENSG00000040199	0.289082	6.95569	7.03658	6.45358	7.03185	6.77202	6.81867	6.81905	6.85775	6.71708	6.80266	6.97291	6.92992	7.03786	6.94976	6.83878	7.29207	7.17205	7.57528	7.59164	7.21958	7.47592	7.5705	7.17394	7.62688	7.56242	7.9316	7.4023	7.78331	7.21187	7.30521	7.25631	7.62	7.98556	7.53506	7.55277	7.17798	7.44707	7.48439	7.38026	7.24135	7.28856	7.20578	7.38706	6.94354	7.44726	7.16683	7.25645	8.18051
ENSG00000040341	0.942288	8.74588	7.77716	7.67781	7.88322	7.91045	8.0321	7.69586	7.83966	7.55645	7.45296	8.31919	8.37778	8.22805	8.18342	7.28805	8.03937	8.35476	7.00606	7.77512	6.87913	7.09956	7.92026	6.83365	7.6734	7.36777	6.79648	7.37049	7.09961	6.91673	6.72835	6.96384	8.18079	6.7748	6.98667	6.9617	6.82796	7.02848	6.65415	7.21624	7.09343	6.86602	6.40684	6.9382	6.92382	7.13585	6.97051	7.05743	6.68136
ENSG00000040487	0.754495	6.95295	6.96718	6.92327	7.05098	6.89184	6.90097	6.76787	6.56793	6.86974	6.9854	6.76437	6.95873	6.80804	6.86226	7.38396	7.31876	7.30482	7.46389	7.01963	6.57198	7.52219	7.02193	6.78702	7.10831	6.87922	6.91881	6.88783	7.30594	7.39745	6.71418	7.12318	7.09276	7.21624	7.05392	7.04251	6.92776	6.41279	7.28719	7.05156	6.69328	6.52629	7.29001	8.01906	6.51486	7.003	6.87577	7.00525	6.81108
ENSG00000040531	0.655517	7.24992	7.62103	7.71801	7.51495	7.41812	7.47658	7.54617	7.06373	7.37752	7.41583	7.68176	7.29083	7.20706	7.12324	7.68358	6.99989	6.94967	8.09169	7.20376	7.12371	7.31311	7.25252	7.12846	7.39458	7.32158	7.39681	7.44328	7.15044	7.32428	7.79183	7.03848	7.12832	7.34385	7.73816	7.33742	7.32158	7.61677	7.46023	7.40988	7.2589	7.52941	7.64868	7.31057	7.18003	7.5346	7.88546	7.74524	8.45078
ENSG00000040731	0.578341	5.32138	5.27754	4.95748	5.15225	5.14272	5.36736	5.07603	5.12297	4.99735	5.20354	5.39902	5.19736	4.89794	5.00366	5.01928	5.03178	6.91793	5.70012	7.37412	5.31087	5.45351	7.13524	5.26117	6.29529	6.74879	5.59277	6.23682	6.83978	5.34515	5.40489	5.67128	7.42566	5.6951	5.47037	5.58642	5.28726	5.38383	5.52771	5.76803	5.37717	5.49617	5.55819	5.82515	5.34579	6.09536	5.60256	5.56867	5.91447
ENSG00000040933	0.746891	5.63622	5.69176	5.59774	5.67929	5.57785	5.59747	5.72618	5.69838	5.73314	5.66939	5.62002	5.64905	5.57589	5.54615	5.63563	5.65709	5.63088	5.99968	6.39819	5.89879	6.60163	6.03516	5.8731	5.91042	5.82386	6.09061	5.8168	6.82713	6.17189	6.07673	5.96759	6.18323	6.11761	5.84602	6.10665	5.93859	5.85204	6.31749	5.871	5.88847	5.79057	6.0394	5.94343	5.79935	6.01094	6.17464	5.96053	5.93401
ENSG00000041353	0.520151	4.25292	4.3004	4.38413	4.38038	4.31221	4.44262	4.24146	4.45441	4.45465	4.42537	4.36252	4.32434	4.51414	4.42427	4.34676	4.39344	4.41957	4.44191	4.49616	4.41264	4.55846	4.5143	4.63645	4.46771	4.46106	4.68153	4.2778	4.41838	4.44513	4.49686	4.71351	4.56468	4.50167	4.37107	4.46213	4.35127	4.4287	4.48876	4.46245	4.47097	4.47991	4.48077	4.70271	4.61944	4.34976	4.42954	4.73769	4.94816
ENSG00000041515	0.242017	6.49431	6.65496	6.29079	6.51506	6.13837	6.53467	6.19667	6.60474	5.97203	6.32542	6.27223	6.40574	6.33902	6.37285	6.44596	6.50198	7.45804	7.51514	8.18307	6.74226	6.88733	7.94864	6.82471	7.26499	7.74975	7.01939	7.1622	9.90704	7.25458	7.11248	7.87427	8.23164	6.98251	7.11932	7.58082	6.67673	6.92673	6.94606	7.74822	6.94036	6.81501	7.45187	7.76417	6.66617	7.62391	6.90762	6.80691	7.10114
ENSG00000041802	0.845618	7.5924	7.38269	8.76164	8.42157	8.74181	8.65761	8.57514	8.23211	7.64034	7.31668	8.5563	8.46395	8.48976	8.52255	8.89121	8.06238	7.48831	7.12286	7.04754	7.72433	6.93628	7.08537	7.23355	7.12843	7.02577	7.43975	7.1464	7.17767	6.98407	7.01731	7.33443	7.25743	7.45042	6.96957	7.70885	7.15979	7.97737	7.28863	7.64904	7.4491	7.8308	7.16973	7.00687	7.51809	7.42889	7.3366	7.35589	7.34664
ENSG00000041880	0.690587	6.06154	6.22056	6.09245	6.33708	5.88129	6.08577	6.05361	6.21232	8.04881	8.05998	6.48492	6.15945	6.02826	6.02756	6.30739	5.9016	6.38972	7.08315	6.34005	6.94195	7.31144	6.21779	7.09324	6.82039	6.56486	6.94134	6.70831	6.64081	6.63004	7.11071	6.81574	6.46317	7.79512	6.51141	6.92404	7.10897	6.84066	6.77635	6.64081	6.39938	6.52465	6.25534	6.6477	6.52427	6.55387	7.07182	6.65705	6.20635
ENSG00000041988	0.474548	6.256	6.45359	6.36517	6.24169	6.05971	6.48064	6.23643	6.3379	6.52352	6.33192	6.35624	6.17909	6.32628	6.3319	6.50054	6.27692	6.66262	6.2187	6.2269	6.1713	6.41553	6.11443	6.09215	6.45782	6.34268	6.20213	5.99024	6.06418	6.24892	6.16317	6.31039	6.0292	6.05206	6.16371	6.24162	5.96815	6.26044	6.26951	6.35528	6.08189	6.08242	6.14629	6.72423	6.07727	6.1087	6.09857	6.06221	6.08356
ENSG00000042088	0.746021	9.16457	8.46139	8.69502	9.29302	9.04326	9.26186	9.16379	8.94439	7.99057	8.16564	9.30046	8.81163	8.9224	9.04753	8.64295	8.77381	8.38224	7.86505	7.27301	7.45773	7.90234	7.58588	7.55082	7.39031	7.23103	7.58773	7.32778	7.62025	7.72747	7.77747	7.72502	7.21757	7.62584	7.67188	7.64166	7.3354	7.34803	7.58458	7.25958	7.37763	7.37352	7.51271	7.83898	7.43019	7.3246	7.57401	7.50821	8.99254
ENSG00000042317	0.560473	4.55755	4.51253	4.4067	4.50165	4.53203	4.53308	4.47464	4.5018	4.84131	4.63246	4.54013	4.56201	4.48575	4.53023	4.55445	4.46694	4.9049	4.45884	5.2462	4.62705	4.5409	5.02154	4.91046	4.83392	5.17317	4.57971	4.76796	4.64861	4.20985	4.56296	4.54784	5.07225	4.50492	4.78557	4.53791	4.6028	4.67426	4.41498	5.49202	4.43012	4.71507	4.62973	4.42304	4.42436	4.98613	4.3651	4.63839	7.32769
ENSG00000042445	0.553696	7.51634	7.60189	7.14847	7.4744	7.34592	7.28243	7.45299	7.07954	9.5391	9.27855	7.32076	7.47396	7.37534	7.27486	7.42175	7.38936	7.29532	8.52027	7.17409	7.84261	6.40129	7.19137	8.11919	7.10793	7.19654	9.45771	7.75312	6.82872	7.73637	6.9105	7.33027	6.95198	9.79929	8.01658	8.71539	7.45506	6.68407	7.66391	6.82306	6.76122	7.35404	7.17279	7.4866	8.97445	7.58616	7.06655	7.63666	7.31795
ENSG00000042753	0.481769	9.75628	9.89565	10.1386	9.98715	9.99823	10.0337	10.0453	10.1497	10.4369	10.8283	9.9502	9.99173	10.1965	9.94961	9.7104	9.96702	9.51671	9.36942	9.5205	8.71334	9.913	9.83477	8.82477	8.83918	9.66745	8.88615	8.71878	9.63132	9.8978	10.0768	8.6414	9.3134	8.66959	8.98663	9.00929	9.30842	9.11849	8.47807	8.89071	9.23647	9.12146	8.38944	8.96462	9.17013	8.86012	9.37223	8.23956	8.79669
ENSG00000042781	0.192447	4.05333	4.29541	4.2894	4.33444	4.22776	4.1821	4.22595	4.1988	4.21343	4.20394	4.14199	4.20366	4.28715	4.18985	4.16858	4.21987	4.31317	4.59985	4.29772	4.39198	4.44686	4.52768	4.35929	4.44894	4.39377	4.7631	4.39431	4.56533	4.49638	4.32657	4.59307	4.40158	4.40008	4.48508	4.43013	4.43266	4.45332	4.42878	4.41303	4.45555	4.30568	4.57242	4.98368	4.25984	4.49964	4.37154	4.43448	4.53759
ENSG00000042813	0.63545	5.58683	5.9971	5.59061	5.74968	5.3983	5.77957	5.54459	5.79043	5.59418	5.73423	5.56814	5.77406	5.81807	5.73794	5.44651	5.8132	5.87861	6.07582	6.16382	6.34401	6.36544	6.32968	6.43284	6.12668	6.27177	6.3947	6.29863	6.34775	6.65016	6.52899	6.51697	6.18864	6.48674	6.3672	6.55316	6.03894	6.3763	6.67951	6.40413	6.57416	6.12233	6.42145	6.30288	6.31063	6.38138	6.57408	6.11957	11.887
ENSG00000042832	0.14214	6.46754	6.56511	6.5167	6.37453	6.32483	6.4504	6.50547	6.48348	6.4771	6.7014	6.2586	6.44717	6.34257	6.26862	6.51238	6.82211	6.58967	7.84181	7.14528	7.16901	7.64183	7.25677	6.70155	7.21637	7.35564	6.66076	6.81802	7.15759	6.87757	7.33306	7.12439	6.69136	7.18723	7.66056	7.30182	6.83071	7.08493	7.18486	7.18203	7.31459	7.21035	7.35412	9.35939	7.15197	6.99848	7.15398	7.66368	7.11671
ENSG00000042980	0.164758	5.41649	5.43582	5.35908	5.4062	5.34982	5.41338	5.37961	5.31228	5.16934	5.21402	5.28558	5.03589	5.28643	5.27686	5.54085	5.1945	5.40595	5.84463	5.77493	5.9164	5.79493	5.75269	5.76516	6.01043	5.40187	5.98696	6.15245	5.65882	5.64527	5.43728	5.72013	5.82367	5.82789	5.77796	5.62836	5.56315	5.47491	6.29568	6.11496	5.62626	5.4094	5.62103	5.79369	5.37308	6.09503	5.92897	7.97184	5.50861
ENSG00000043093	0.737966	9.42419	8.62596	8.59379	9.37514	9.09878	8.98025	8.72705	8.82132	8.56859	8.40748	8.8439	9.08315	8.63664	8.92394	9.10462	8.9565	8.53164	6.63405	7.21444	7.93469	7.13697	7.59623	7.5349	7.32775	7.49862	7.52782	7.55871	6.59635	8.47394	7.10254	7.21973	7.57167	7.54851	7.32216	7.37827	7.33713	7.56222	6.9955	7.36324	7.57106	7.85677	8.67003	6.61656	7.55609	7.3226	7.62385	7.3568	7.40998
ENSG00000043462	0.189302	4.87276	4.73568	4.89615	4.79793	4.74804	4.7138	4.85533	4.83314	4.75793	4.79787	4.76551	4.68879	4.77411	4.82401	4.8438	4.76477	4.77236	5.78039	5.3987	5.7606	7.2582	5.40237	5.26357	5.45254	5.07429	5.82525	5.44521	5.2591	5.74677	5.15678	5.63655	5.24052	6.03121	5.75824	5.76231	7.13512	5.25181	5.52719	5.30068	5.65927	5.42131	5.40619	5.56746	5.14643	5.65211	7.79341	5.46498	5.0984
ENSG00000043514	0.638496	8.66506	7.95046	7.71781	8.10975	8.15884	8.14894	7.69664	8.01706	7.49967	7.66962	8.51252	8.98612	9.16698	9.27993	7.90044	8.39871	7.72016	7.23866	6.85911	7.27388	6.82559	6.91447	7.68053	6.78936	6.81224	7.267	7.3328	7.05663	7.26786	7.11855	7.13816	7.24396	6.80844	6.91465	6.84923	7.58399	7.30074	7.17368	7.91133	7.77006	7.31238	6.62035	6.98076	7.62683	7.22657	7.11925	7.44716	7.69433
ENSG00000044090	0.532634	7.3808	7.55214	7.47055	7.39255	7.53177	7.39043	7.32802	7.57352	7.70463	7.82182	7.28063	7.45555	7.51662	7.53063	7.81474	7.5359	7.87201	7.79086	7.32372	7.30571	7.37532	7.41763	7.43275	7.44575	7.92966	7.07317	6.92296	7.64623	7.63077	8.1494	7.32301	7.30684	7.31777	7.2557	7.44706	7.27916	7.52888	7.21203	8.27013	7.09812	7.22515	7.58263	7.43077	7.18519	7.14197	7.09739	7.43842	7.24747
ENSG00000044115	0.710106	8.47846	8.37004	8.28071	8.55873	8.41027	8.46017	8.38301	8.47653	8.43208	8.50392	8.38409	8.49358	8.44608	8.49051	8.30406	8.60242	8.31046	7.98071	7.52421	8.15203	7.1	7.50182	8.1691	7.71823	7.1627	8.17173	8.18034	7.60667	7.57864	7.81016	8.1745	7.5659	7.98397	8.19697	7.30103	8.3842	8.05489	7.67213	7.5105	7.98144	8.04921	7.66186	7.6017	8.09939	8.02207	7.90291	7.95623	7.15134
ENSG00000044459	0.725127	6.22305	6.32068	6.3953	6.24331	6.57599	6.3929	6.31298	6.29034	6.22002	6.13296	6.45175	6.74101	6.03205	6.02402	6.46218	6.57299	6.67528	6.55969	6.41096	6.52348	6.29574	6.21937	6.12241	6.35739	6.36311	6.3515	6.2308	6.33883	6.80703	6.52474	6.51841	6.29134	6.45639	6.25079	6.71935	6.17535	6.41526	6.33673	6.67187	6.1846	6.29861	6.28564	6.63258	6.39356	6.51998	6.48293	6.39667	6.4852
ENSG00000044524	0.521548	4.40399	4.38826	4.41132	4.35694	4.43021	4.30462	4.47533	4.4541	4.34095	4.34285	4.42366	4.42108	4.42642	4.35632	4.40734	4.41302	5.07748	4.67083	4.65724	5.31295	4.6095	4.72283	4.54548	4.54511	4.51661	4.73397	4.55299	4.99581	4.58558	4.65833	4.91076	4.63173	4.66171	4.59571	4.85391	4.8856	4.56417	4.7007	4.56113	5.21665	5.10802	4.62633	4.60475	4.52017	4.65514	4.69292	4.64995	4.53801
ENSG00000044574	0.664621	11.0036	10.2875	10.6599	10.3996	10.9921	10.6591	10.7899	10.4823	11.105	10.9094	10.536	10.7063	10.8475	10.7817	10.1904	10.7499	9.88084	9.32977	9.69344	10.2326	10.0371	9.53225	10.1395	9.51378	9.39186	10.0114	9.72101	9.35017	11.2759	9.45108	10.1905	9.62826	10.2368	10.6624	10.8453	10.5644	10.4899	10.4375	11.3618	10.8616	11.2663	8.62474	9.8869	10.9638	10.0383	10.4573	10.2567	10.7858
ENSG00000046647	0.215774	4.71516	4.91307	4.97972	5.07033	4.94965	4.8621	5.15574	5.04149	5.34133	4.87404	5.19926	4.86094	5.3881	5.604	4.86313	5.70401	5.23346	5.58285	5.43453	5.43654	5.34656	5.53395	5.29152	5.51358	5.42258	5.34575	5.4591	5.57449	5.21883	5.36692	5.84294	5.42168	5.1925	5.52567	5.27634	5.18581	5.21563	5.14525	5.51464	5.16271	5.34365	5.39246	6.05679	5.09767	5.67392	5.19027	5.25296	5.02477
ENSG00000046653	0.420441	8.393	8.32615	8.25596	8.21986	8.59818	8.36302	8.29339	8.05777	5.19897	5.2182	8.58438	8.37477	8.67687	8.97351	7.89527	9.26837	8.28024	5.99122	11.0873	7.1399	5.68131	10.4986	7.89245	11.0062	9.83434	6.34885	11.7677	9.49218	5.39803	6.09659	5.74504	11.0552	5.65025	5.94592	5.44282	6.48598	5.58918	5.68725	7.33808	5.3604	6.91918	5.42101	5.78403	6.84694	11.239	7.21065	5.65127	5.28678
ENSG00000046774	0.274171	5.56454	5.91833	5.82738	5.80948	5.65381	5.71952	5.69547	5.83352	5.70054	5.86252	5.63923	5.74345	5.81837	5.74435	5.66614	5.8691	6.12596	6.89977	6.57511	6.23253	6.31983	6.54822	6.38253	6.72127	6.37912	6.6775	6.36391	6.39026	6.59948	6.44355	6.55518	6.35605	6.49494	6.66141	6.71028	6.36707	6.26323	6.23913	6.17809	6.28827	6.2347	6.71981	6.53079	6.17651	6.58257	6.49409	6.40518	7.19389
ENSG00000046889	0.635762	4.92523	5.15601	5.00194	5.24259	5.03115	5.02896	4.951	5.07953	4.98589	5.05755	4.89071	5.0115	4.83317	5.06342	5.17464	5.1824	5.26799	5.62584	5.16444	5.21419	5.35252	5.5338	5.13383	5.40044	5.19111	5.54628	5.19562	5.26739	5.48359	5.42655	5.43751	5.26287	5.35597	5.65139	5.21024	5.14991	4.95888	5.21274	5.26171	5.13465	5.18536	5.61241	5.54294	5.56085	5.36182	5.17468	5.14939	5.39482
ENSG00000047056	0.95436	8.20416	8.44141	8.06747	8.33754	8.40771	8.29686	8.14708	8.05232	8.6189	8.93508	8.32187	8.37002	8.1517	8.25887	8.1039	7.95138	8.87106	8.70849	8.79514	7.89811	7.96356	8.78654	8.23031	8.44115	8.88094	7.87976	8.16746	8.32855	7.84555	7.52361	8.23335	8.86568	7.85477	7.8739	7.63371	8.03709	7.85941	7.88016	9.35777	7.73106	8.10312	7.64196	8.06084	8.06739	8.38427	8.79558	8.47734	7.52481
ENSG00000047188	0.605314	5.88399	5.77537	5.80757	5.63493	5.95283	5.81385	5.90903	5.53168	5.45602	5.40092	5.59909	5.82373	5.72171	5.85618	5.20453	5.67347	5.4363	5.09974	5.60631	5.59877	4.8887	5.22609	5.70577	5.45006	5.22328	5.31551	5.50135	5.11706	5.66401	5.3402	5.46176	5.72381	5.45873	5.38891	5.59782	5.97254	5.31029	5.3824	5.92026	5.46074	5.5199	5.23667	5.00394	5.62645	5.60561	5.39386	5.88055	6.32663
ENSG00000047230	0.535438	6.47609	6.24645	6.78363	6.8776	6.90508	6.69559	7.47377	7.05025	5.85276	5.52058	7.59214	7.02474	8.01189	7.76552	6.82839	8.49276	5.7021	5.46702	5.1037	5.73998	5.40278	5.29419	5.9207	5.21267	5.33956	5.67499	5.17051	5.59046	5.56203	5.64003	5.22323	5.1972	5.82168	5.52651	5.42375	5.52916	5.77019	5.4786	5.23499	5.31154	5.23418	5.30494	5.30693	5.36169	5.40568	5.29597	5.37261	5.25522
ENSG00000047249	0.727381	9.44509	9.45004	9.19445	9.31058	9.23086	9.25566	9.50057	9.12374	10.1648	9.86756	9.37699	9.16674	9.62107	9.7865	9.6715	9.56654	9.46856	8.14507	10.5415	7.68135	7.40849	9.83939	8.05192	9.62033	9.19902	7.7068	8.67979	8.61531	7.39354	7.45395	7.52497	10.0796	6.98303	8.33036	7.38475	8.3644	7.84501	7.01003	9.38671	8.12643	8.0648	7.71822	7.70805	8.39384	8.72537	7.80263	8.4516	7.63074
ENSG00000047315	0.777989	10.7875	10.3515	10.2579	10.7172	10.7075	10.564	10.599	10.6875	10.5941	10.3388	10.6377	10.5295	10.4449	10.52	10.5441	10.4766	10.9731	8.23487	9.19855	9.46757	8.51724	8.96065	9.68885	9.37767	8.9753	9.15913	9.43422	9.58768	9.4834	8.49024	9.47113	9.48588	8.89014	9.17131	8.91539	9.34629	9.40322	9.12197	9.76524	9.39814	9.73231	9.68181	8.41295	9.37489	8.99748	9.07258	9.41292	9.34746
ENSG00000047365	0.86537	5.95456	5.74312	5.78522	5.72395	6.02031	5.60345	5.8704	5.98551	4.96234	5.13863	5.66917	6.12318	5.63891	5.82498	5.91719	5.96043	5.69819	5.47539	6.45064	5.74201	5.59421	6.35653	5.99449	7.14065	6.36517	5.6972	7.49601	5.80294	5.67412	5.54853	5.73812	6.72114	5.90626	5.65986	6.03237	6.761	5.73046	5.6829	6.00434	5.60247	5.62034	5.65083	5.47301	6.27775	6.75757	5.99828	6.01943	5.89094
ENSG00000047410	0.740637	8.3179	7.93788	7.96039	7.83358	8.35862	7.87719	8.09059	7.91112	7.71141	7.66652	7.76834	8.07474	7.93548	7.86407	8.16629	8.0353	7.555	6.44433	6.80352	6.82699	6.18255	6.07592	7.2659	6.69398	6.16959	6.78928	6.97612	6.20338	7.0288	6.86035	6.80691	6.70437	6.65846	6.8114	6.59243	6.62856	7.03976	6.61136	7.03385	6.75762	6.93698	6.7772	5.93946	7.10917	6.35711	6.81072	6.5582	8.49986
ENSG00000047578	0.710551	6.76791	6.91771	7.03917	6.84894	7.07355	6.71782	6.75683	6.76371	7.11806	7.28056	6.95843	6.96703	6.92466	6.70244	6.91409	6.78369	7.01089	7.29301	7.60148	7.52803	7.04369	7.17109	7.69745	7.75842	7.50485	7.5513	7.60204	7.56841	6.82947	7.48222	7.28912	7.79083	7.61929	7.09049	6.91592	7.18549	7.23514	7.37388	8.37837	6.89043	7.42063	6.86221	7.12985	7.47778	7.81338	6.99729	7.79063	8.03674
ENSG00000047597	0.824296	4.76195	4.80647	4.99504	5.13067	5.06714	4.75448	5.10879	4.85917	4.45522	4.548	4.92291	4.89144	5.11514	5.1605	4.75218	5.52812	4.69917	4.88353	6.90992	5.3378	7.8118	6.1009	4.62836	5.8248	6.05724	7.68789	5.10276	5.42595	8.94662	4.87957	5.31077	6.7599	6.69287	4.6986	4.72066	4.77756	4.6318	5.48798	5.89612	4.73675	4.96819	5.15048	4.77231	4.94453	5.70326	4.78203	7.86084	5.17214
ENSG00000047617	0.186091	5.61911	5.90304	5.89824	5.90017	6.08712	6.13442	6.09315	6.10115	5.71483	5.60195	5.7852	5.80758	5.9603	5.66941	5.87218	5.74674	5.92361	6.26293	5.98123	5.95523	5.83755	6.2154	5.78161	6.02474	5.97729	5.97398	5.88789	6.23893	5.88696	6.07897	6.59686	5.93758	5.94061	6.12366	6.02633	5.76582	5.75186	5.91955	6.18252	6.35889	5.87111	6.30389	6.02792	5.8755	6.01244	5.92202	6.12666	6.04923
ENSG00000047621	0.811515	6.63707	6.52849	6.56004	6.2818	6.58494	6.43736	6.65395	6.42808	6.55064	6.39459	6.43924	6.43327	6.78334	6.63878	6.17016	6.50007	6.18727	6.30998	6.35397	6.24671	6.008	6.47412	6.19261	6.83011	5.95973	6.44347	6.32787	5.9808	6.36849	6.17503	7.05078	6.55495	6.30093	6.65047	6.50706	6.4568	6.11674	6.13105	6.43484	6.5149	6.52824	7.11649	6.90719	6.19915	6.79205	6.43295	6.58968	7.10279
ENSG00000047634	0.723193	4.8433	4.55291	4.81517	4.61683	4.89717	4.55598	4.72968	4.36156	6.10845	6.15298	4.65807	4.51351	5.29238	5.28261	4.22424	5.20277	5.72514	5.46009	5.47599	5.826	5.01228	5.2356	5.94076	5.74654	5.33533	6.02492	6.32569	5.03722	7.05676	5.23815	5.32731	5.93702	5.81767	5.23233	7.71494	5.96901	5.80177	6.55292	7.19307	5.37164	6.19186	5.81566	5.25947	5.90022	5.72284	5.50741	5.86527	8.29038
ENSG00000047648	0.710324	4.45501	4.57588	4.59091	4.59592	4.36186	4.46628	4.59804	4.44157	4.62409	4.6496	4.47162	4.47374	4.26305	4.36578	4.49216	4.4665	4.85271	4.77538	5.65406	6.00861	5.08653	4.94635	5.18701	5.49493	4.84588	5.45619	5.04804	4.8381	4.99588	5.26442	5.20609	5.35658	4.88357	5.35826	4.84067	5.25065	5.7863	5.05088	5.30708	5.02705	6.13433	5.68671	4.92403	5.07047	5.27049	5.24399	5.04262	4.80912
ENSG00000047849	0.0871452	7.78562	7.86999	7.86735	7.62988	7.93835	7.71505	7.74707	7.82129	8.42375	8.28404	7.85385	7.72845	7.86507	7.71139	7.85089	7.80741	7.85314	7.61821	8.1224	8.36169	7.20579	8.31536	7.75828	8.26564	8.67702	7.77181	8.80646	8.59946	7.2984	8.01303	8.74551	8.09997	7.39635	7.63298	7.25128	8.12745	8.12406	7.40036	7.45022	7.44337	8.44646	9.66597	7.77691	8.04098	9.17683	7.49597	7.42272	7.93515
ENSG00000047936	0.35985	4.59431	4.58287	4.58139	4.5606	4.4345	4.35945	4.5926	4.57581	4.64174	4.57389	4.40007	4.51596	4.84568	4.44446	4.58736	4.64919	4.74434	5.09769	4.78916	4.72663	4.90941	5.11567	4.73349	5.09674	4.93	4.98652	4.85664	4.80283	4.89763	5.45448	4.98762	4.98737	4.93085	4.88703	5.27997	5.37396	4.94273	4.8097	4.88963	4.8263	4.78368	5.46415	5.72812	4.8942	4.92363	5.09916	4.75984	4.99994
ENSG00000048052	0.310914	6.4118	6.30701	6.12248	5.94629	6.47444	6.68582	6.02311	6.28226	5.68459	5.70039	6.36491	6.25338	5.87846	6.624	6.30462	6.15189	6.76397	6.18606	6.68658	6.22441	6.11853	6.78259	6.07805	6.5499	6.20951	6.00891	7.15749	6.96009	6.25251	6.06957	6.29046	7.10067	5.86941	5.88816	5.91933	6.17605	5.65727	5.84474	7.31989	6.31748	6.28561	6.37339	6.21204	5.82378	6.62591	6.5449	6.12437	6.26173
ENSG00000048540	0.245202	6.6657	6.77075	6.77217	6.55128	6.70161	6.53474	6.39254	6.23	6.30584	6.11177	7.09079	6.67946	6.15968	5.98974	6.21853	6.17694	9.28293	7.54688	10.8136	9.64866	6.99168	10.6351	6.81748	10.9786	8.13369	8.32268	8.76904	10.6979	6.90603	7.07436	7.23127	10.7445	7.40682	7.10275	6.9802	9.84641	7.14822	7.02178	9.39102	6.5189	7.76363	7.29026	6.99573	6.60197	8.88512	6.92978	7.1683	6.89902
ENSG00000048545	0.0445453	7.48811	7.13111	7.19716	7.35145	7.81145	7.53837	7.1736	7.31961	5.57167	5.73662	7.88171	8.11259	8.5788	8.72887	8.21168	8.31684	6.29308	5.95538	6.48638	5.89149	5.99094	6.45661	5.81499	7.08192	5.86035	5.91214	5.95391	6.61427	5.83001	6.17145	6.04868	6.25954	5.90014	5.9163	5.86571	5.75022	6.00565	5.92784	6.44743	5.85924	5.76113	5.92949	6.17941	5.87081	5.91749	5.95545	6.10093	7.35073
ENSG00000048649	0.731799	6.71593	6.31948	6.35113	6.27438	7.05494	6.23879	6.20065	5.50779	6.03644	5.23962	6.81138	6.52136	6.35857	6.80021	6.48915	6.41944	5.76459	4.83156	5.25821	5.23966	4.813	4.70878	4.96169	5.02619	4.77758	5.06318	5.47409	4.8041	4.88007	4.81177	4.92105	5.14728	4.94501	4.91695	4.76496	4.98994	5.1496	4.99745	5.46531	5.13042	5.43107	5.16551	4.40066	5.18294	5.08324	4.90113	4.87513	5.98847
ENSG00000048707	0.75498	6.50727	6.55501	6.49536	6.56527	6.52645	6.56409	6.52508	6.5542	6.632	6.64324	6.31863	6.52852	6.57975	6.46644	6.44327	6.56541	6.77145	6.95744	7.19668	7.45183	6.86252	7.10015	7.29168	7.1887	7.19765	7.09683	7.09463	7.31812	6.5772	6.81943	7.49932	7.31599	6.89993	7.10396	6.9783	7.05455	7.16624	6.97335	7.15378	6.84955	7.46834	7.32513	7.00161	7.61329	7.22904	7.12872	7.04968	6.98994
ENSG00000048828	0.888795	7.02564	7.14432	7.01281	6.98274	7.13229	7.24259	7.23443	6.98169	7.67593	7.58939	6.98157	7.01611	7.07501	6.75307	6.88771	7.17148	6.38963	7.39066	6.91809	7.33372	6.99585	6.69271	7.28808	6.99749	6.64122	7.52905	6.90876	6.39852	6.86815	6.82019	7.19217	6.99502	7.26588	7.3386	6.95772	7.06476	7.42555	7.27131	7.07434	7.15958	7.28175	6.94153	7.06666	7.22575	6.80695	7.2885	7.31696	6.54329
ENSG00000048991	0.83427	7.58221	7.41715	7.45922	7.30809	7.65953	7.42008	7.47983	7.58918	7.18076	7.10452	7.32337	7.41889	7.07851	7.36142	7.3797	7.44185	7.42617	6.94927	7.63205	6.8188	6.90284	7.76542	6.59864	7.32322	7.15077	6.59263	7.13445	8.29174	7.11835	6.66696	6.90572	7.78981	6.55974	6.94647	6.51706	6.59252	6.75356	6.62821	7.24548	6.51243	6.71274	7.13842	6.70427	6.82963	7.16763	6.76728	6.76345	7.28876
ENSG00000049089	0.542356	6.09423	6.30942	5.96352	5.77098	5.97627	5.83695	5.91588	5.6898	5.65707	5.66516	5.70889	5.94519	6.05363	5.45471	5.7839	5.54677	6.24758	6.41115	7.50465	6.8563	6.98127	7.53813	6.7577	7.97305	7.30405	6.02456	8.37583	7.14205	6.50028	7.24054	7.10253	7.50653	6.80849	6.87165	6.45866	6.18636	6.25418	6.12699	8.81462	6.48591	6.50222	6.77304	7.151	6.31851	8.54986	6.32238	7.17597	6.10853
ENSG00000049130	0.879556	4.34285	4.39214	4.34928	4.46285	4.32325	4.51232	4.28068	4.39822	4.33079	4.57469	4.31608	4.34498	4.44021	4.35801	4.3866	4.40094	4.51496	4.32236	4.41389	4.73559	4.57494	4.41342	4.63669	4.51129	4.46758	4.65972	4.32961	4.45561	4.41364	4.73547	4.29047	4.33871	4.47927	4.81742	4.32538	4.48788	4.50319	4.65404	4.44865	4.55113	4.46726	4.33638	4.48962	4.47781	4.33857	4.53596	4.45682	4.32069
ENSG00000049192	0.322384	5.46626	5.54103	5.49575	5.77154	5.34274	5.65815	5.42821	5.69694	5.61518	5.8926	5.24928	5.57065	5.85627	5.56365	5.66618	5.62012	5.85716	5.9227	5.75539	6.01808	6.06901	5.91176	5.96853	6.04187	5.88368	6.19499	5.80098	6.15001	6.08662	6.14166	6.12313	5.97034	6.27974	6.00218	6.40632	5.94347	6.04165	6.20274	5.84661	6.17793	6.01859	5.82364	5.97246	5.93043	5.798	6.05325	5.69116	5.86531
ENSG00000049239	0.786589	6.5352	6.57515	6.43775	6.62025	6.32264	6.4428	6.24835	6.48574	6.54688	6.55084	6.36651	6.44	6.73351	6.56281	6.46354	6.67201	6.79487	6.9023	6.64976	6.92948	7.26237	6.8066	7.03346	6.6231	7.13468	6.80664	6.7604	7.01756	7.25199	7.49036	6.71088	6.47308	6.96001	6.89048	7.56031	6.88922	7.33774	7.01325	6.52352	6.66653	6.63574	6.76809	7.80608	6.92694	6.67633	6.62882	6.80045	6.6116
ENSG00000049245	0.840797	8.11557	7.63101	7.70774	7.65289	8.08028	7.79649	7.85016	7.61044	9.19336	9.35928	7.89332	7.96129	8.02394	8.17251	7.45009	8.12726	7.80805	8.71228	8.02982	9.07636	8.53653	7.8183	8.62836	8.15913	7.20851	8.78079	9.425	7.50974	7.68135	8.15322	8.36178	8.00846	8.45858	8.93825	7.71552	9.09587	8.54958	7.89134	8.07358	9.21199	8.36706	8.51022	7.87863	8.5348	9.62459	8.87301	8.24472	8.64463
ENSG00000049246	0.847629	5.7374	5.8699	5.55581	5.97221	5.60792	5.69162	6.51513	5.86437	6.38207	6.32008	6.14705	6.11252	6.29831	6.38548	5.65431	6.54383	5.8592	6.04513	7.1082	7.57593	5.96484	6.78123	7.58843	7.01235	9.02806	6.85583	7.79417	6.11498	5.86901	5.95374	6.34755	6.78227	6.79464	5.91226	6.31344	6.49113	7.32968	6.49709	8.51379	5.96899	6.28099	6.40221	6.64272	6.57956	8.2719	5.91492	7.35048	6.5156
ENSG00000049319	0.69807	6.56006	6.52896	6.67329	6.64224	6.57096	6.67265	6.56963	6.70748	6.59878	6.74317	6.54811	6.4468	6.55888	6.70552	6.58937	6.61346	6.75687	7.1767	6.53797	6.7702	6.75384	6.60826	6.48339	7.05527	6.47312	6.51027	6.59546	6.59413	6.69595	6.62688	7.19694	6.62401	6.72118	6.66422	8.51557	6.59876	6.22907	6.82889	6.6064	6.45912	7.06288	6.82291	7.00403	6.26448	6.55911	6.66932	6.52	6.79964
ENSG00000049323	0.874481	9.30567	9.19983	8.71715	9.10574	8.97996	8.53468	9.03935	8.61325	10.6036	10.1673	8.87304	8.81869	8.18808	8.02013	8.71601	8.33697	8.381	7.31861	7.26433	8.9797	7.5018	7.21628	7.80318	7.46641	7.1798	7.33941	7.48212	7.61203	7.89993	7.96899	8.23745	7.30575	7.34428	7.45382	7.47538	7.89037	7.85967	7.28235	7.71299	8.74642	8.74608	7.3017	7.6775	8.02468	7.59689	7.24214	7.67426	7.62477
ENSG00000049449	0.669795	9.68073	9.19552	9.0292	9.45441	9.39865	9.5377	9.31696	9.4806	10.5754	10.1083	9.9709	9.56055	9.34118	9.23805	9.01159	8.58033	9.42316	7.48225	7.56479	8.23307	6.29947	6.89658	7.95891	8.26052	7.53322	7.28424	6.82918	6.5916	6.96753	7.79284	6.90692	7.21142	7.09677	7.52403	7.52636	8.14682	8.80866	6.96745	9.30866	8.68541	9.11757	6.64188	7.96058	7.59938	7.75042	7.66748	6.98576	7.16053
ENSG00000049540	0.37391	6.3642	6.30037	6.22259	6.28917	6.15686	6.24292	6.34383	6.53253	7.86684	7.81512	6.43384	6.27658	6.45911	6.17696	6.36625	6.36647	6.70339	6.80549	6.59241	7.41605	7.23578	6.6939	6.80391	6.62442	6.80205	6.89832	6.72434	7.11104	6.88194	8.67754	7.27724	6.43929	6.9312	6.81472	7.1132	7.19854	7.11773	7.40466	6.61413	6.72943	7.591	6.72137	7.14642	7.29139	7.299	6.99397	6.41221	6.59311
ENSG00000049541	0.778423	7.29051	7.1486	6.89278	7.66805	7.33487	7.49618	7.28732	7.48717	6.3632	6.26565	7.4952	7.46966	7.5318	7.47151	7.19057	7.28032	6.39138	5.97283	5.97131	5.99658	6.55451	6.24985	5.92099	5.98558	6.29149	6.0752	6.0416	6.3506	6.54465	6.29623	6.03221	5.95404	6.01654	6.03713	6.10217	6.10976	5.99143	6.2752	6.11884	6.07051	6.14739	6.08208	5.99805	6.14437	6.01524	6.14738	6.15199	5.87451
ENSG00000049759	0.187546	8.01635	7.91096	7.85025	7.94161	8.12095	8.01952	7.98091	7.95091	5.87029	6.09903	7.88729	7.99393	8.01079	8.02801	7.93133	7.80201	7.90792	6.73732	7.16996	6.94656	6.85339	7.31508	7.88115	7.01779	7.28982	8.29365	6.51225	8.6296	6.98055	7.62688	7.00511	7.36316	7.12511	7.35834	6.93212	8.07202	6.68682	7.56938	7.40033	6.91825	7.74865	7.19347	7.23454	6.85978	6.47678	6.23586	8.08791	6.79933
ENSG00000049860	0.686079	10.5092	10.0653	9.54722	9.57265	10.0776	9.95145	9.92616	9.58956	11.0922	11.102	9.91067	9.87863	10.2287	10.27	9.27069	10.3529	9.18748	8.00759	7.92214	9.24489	8.18291	7.40137	9.11383	7.89104	7.14701	9.6984	7.87618	6.70381	8.60491	7.13011	8.79407	7.94087	9.18089	9.22236	9.09092	10.7054	9.30034	8.99543	8.66848	11.4731	9.15964	8.38421	8.33403	8.9957	7.83932	9.10546	9.05329	7.69971
ENSG00000049883	0.732771	6.67977	6.80177	6.41514	6.72439	6.62771	6.34207	6.81083	6.90267	6.99159	6.73974	6.61281	6.70775	6.81674	6.85829	6.88325	7.0598	6.17668	7.2212	6.89937	6.88506	6.68708	6.92899	7.24856	7.03778	6.39921	6.77931	6.95203	6.8908	6.84464	6.60529	7.23267	6.78342	6.59022	6.81486	6.95736	5.99318	6.95842	6.42145	6.90126	6.5233	6.49842	6.73653	6.67932	6.98627	6.53566	6.77912	6.21919	6.54968
ENSG00000050165	0.593016	8.24385	7.917	8.11353	7.27592	8.13837	7.34944	8.19761	6.91155	10.2092	10.0027	7.66538	7.41185	6.71408	6.81416	7.28857	6.94021	6.81264	7.35884	10.475	8.34588	4.93582	10.4954	7.38459	10.4959	9.99225	6.6045	9.09401	9.19603	5.03256	7.34217	9.2446	10.3974	5.63928	6.25083	4.96797	8.8667	6.8134	5.22887	8.17268	6.06142	7.85094	5.23923	6.26845	7.15236	10.1793	6.77027	7.35011	7.72355
ENSG00000050327	0.689256	7.63901	7.71462	7.87032	7.62961	7.94243	7.64113	8.08098	7.72217	7.32378	7.15217	7.63093	7.44518	7.79684	7.62248	8.08323	7.71821	7.41038	7.89283	7.7063	7.77635	8.06989	7.957	8.71412	8.10371	7.61366	8.51756	7.7281	7.74119	7.8021	8.77996	8.07052	7.56089	8.39748	8.26622	8.4479	8.25281	7.84484	8.20726	8.41012	8.1626	7.97544	7.90655	8.73102	8.89281	7.46804	7.86059	8.48729	7.84061
ENSG00000050344	0.640416	6.13591	5.56308	5.46622	5.51886	5.88843	5.86042	5.65986	5.55539	4.58702	4.62562	5.44954	5.71765	6.2551	6.12016	5.1864	6.16398	4.70421	4.80583	4.89841	4.8048	4.97326	4.93309	4.85845	4.82895	4.74437	4.86001	4.89917	4.91494	4.92323	4.64772	4.75943	4.84649	5.01374	4.83441	4.78625	5.11043	4.80921	4.90798	4.81028	8.67432	4.6687	4.81175	4.97066	5.39161	4.99822	5.19827	5.25297	5.06385
ENSG00000050426	0.684012	8.44733	7.99035	7.90324	8.04405	7.78756	7.22401	8.0233	7.81854	8.03519	7.98534	7.65561	8.14519	8.02139	8.03435	7.67757	8.00484	8.0485	8.48662	8.40224	8.27621	7.96169	8.44274	8.71794	8.33371	8.75501	8.49153	8.12916	8.49424	8.0566	8.34366	7.66075	8.48835	8.76254	8.06054	8.1903	8.13	7.86757	8.4757	9.01237	7.6779	7.95108	7.77537	8.39584	8.37456	8.40051	7.68417	8.5608	7.96767
ENSG00000050438	0.685189	5.15303	5.08959	5.07199	5.02423	5.04944	5.22371	5.29633	5.06602	4.95138	4.83227	4.82015	5.2292	5.42225	5.05292	5.0526	4.99882	4.88803	4.94504	5.5599	4.77936	5.03711	5.44064	4.89292	5.22151	5.65626	5.07564	5.82119	5.53741	4.78662	5.06424	4.71724	5.71213	5.21829	4.75869	4.79088	4.92555	4.6947	4.82204	5.73284	4.90097	4.6989	4.9526	4.87287	4.61968	5.11518	4.96886	5.05785	6.57955
ENSG00000050555	0.723127	5.76238	6.62043	6.20923	6.01013	6.22222	6.41013	6.24464	6.27637	5.87442	5.81897	6.00908	6.15203	6.57526	6.2645	6.40224	6.24076	6.52082	7.89522	6.93411	7.30535	6.8243	6.83017	7.31803	6.50746	6.7024	6.93381	6.83017	7.08387	6.6799	7.45434	6.86188	6.594	6.59339	7.46566	6.69926	7.13979	6.67136	7.42806	7.16619	7.91205	6.57281	6.99267	7.28911	6.9884	6.84401	7.10658	6.98543	7.64347
ENSG00000050628	0.662698	4.8617	4.88242	4.89732	4.93313	4.72621	4.84892	4.81381	4.91763	4.89823	4.92335	4.79071	4.82425	4.81899	4.79344	4.89542	4.8277	4.98448	5.24536	5.20175	5.35725	5.23271	5.14558	5.26495	5.05453	5.02594	5.15154	5.01895	5.07586	5.0828	5.02131	5.1607	5.07443	5.04929	6.33513	5.22689	5.01328	5.19848	5.31222	4.97366	5.01103	5.08018	5.04796	5.56241	5.43513	5.01511	5.15407	5.5366	5.01879
ENSG00000051108	0.520477	9.27164	8.94816	8.21459	9.17331	8.72304	9.30847	8.71063	8.4851	10.0674	9.95471	8.35253	8.62067	9.18685	9.24016	7.34661	8.37086	9.34312	9.45866	8.84323	9.80127	9.91574	9.12114	10.1273	8.7188	9.44773	10.0162	9.4917	8.55705	9.26978	8.97828	8.94329	9.15537	9.62356	9.53767	9.61134	10.515	10.0406	10.3114	10.1805	10.1294	10.5691	9.02751	10.2936	9.52489	9.57056	10.0263	10.3965	8.60238
ENSG00000051180	0.882375	6.79114	6.54407	6.88012	6.75875	6.95244	7.01404	6.97522	6.72106	5.82888	5.81587	6.97876	7.05624	7.05967	6.96968	6.75599	6.94018	6.1414	5.82776	5.47919	5.59694	6.17392	5.57905	5.56179	5.82983	5.71726	5.93754	5.62813	5.68151	6.27115	5.8646	5.87247	5.54207	5.76494	5.53996	5.70558	5.53328	5.6326	5.81978	5.69869	5.89133	5.6419	5.69623	5.89236	5.59964	5.57732	5.48591	5.64808	6.08953
ENSG00000051341	0.527336	6.96032	6.8832	6.83689	6.85868	6.65311	6.80543	6.7799	6.88527	6.02584	6.39625	6.62659	6.87428	6.73549	6.78991	6.71116	6.68014	6.66563	7.08983	6.91106	6.59394	7.67895	6.83335	6.7375	6.92901	6.73039	6.93525	6.84978	6.94892	7.52891	6.99358	7.04661	6.92818	7.22099	6.72794	7.05944	6.48417	6.59356	6.93192	6.99388	6.77326	6.63472	7.19156	7.15704	6.62127	6.94482	6.75017	6.94404	7.05017
ENSG00000051382	0.365503	6.02309	5.65352	5.7594	5.82221	5.94838	5.70457	5.91895	5.80846	5.88386	5.67697	5.95493	5.6634	5.83318	6.1345	5.8332	6.09884	5.24792	5.2996	5.9053	5.55466	5.51211	5.99806	5.56055	6.00322	6.06197	5.83815	5.58752	5.61523	5.37258	5.06335	5.62195	6.12654	5.67525	5.83755	5.35242	5.54273	5.4369	5.78158	5.44076	6.31072	5.53544	6.05283	5.41564	5.92887	5.71313	5.49702	5.69549	5.18701
ENSG00000051620	0.695226	9.11328	8.85077	9.3315	8.9851	9.63385	9.18985	9.49082	8.91756	10.1237	10.1317	9.44749	9.32393	8.98891	8.98202	8.50182	9.11672	8.42034	9.00645	7.99157	9.65728	8.83118	7.27753	9.88362	7.9963	8.69879	9.70874	8.35474	8.39531	8.15188	7.84602	9.99797	8.11246	9.14563	9.58293	8.95111	8.22086	9.30578	9.44446	9.68051	9.91097	10.0034	10.4039	9.51617	10.2708	8.43482	8.94546	9.75391	6.99292
ENSG00000051825	0.294618	5.95756	5.75663	5.81228	5.73307	6.06502	6.0397	5.85992	5.63939	5.74861	5.42575	6.21556	6.24861	6.18669	5.99206	5.72875	5.82088	6.01331	5.43372	5.64691	5.57732	5.64665	5.64918	5.48298	5.91291	5.88713	5.51512	5.86022	5.48762	6.12965	5.49968	5.54459	5.87863	5.57637	5.61259	5.60255	5.37867	5.42715	5.35644	6.34644	5.50228	5.39203	5.35558	5.46171	5.41984	5.65927	5.50446	5.52256	5.93998
ENSG00000052126	1.02688	9.22951	8.51265	8.62113	8.63571	9.30351	8.94029	9.13964	8.31438	7.52363	6.9757	8.95055	9.00354	8.75919	8.59573	8.65396	8.91901	7.75029	8.53788	7.43572	7.92796	4.59234	6.85124	7.59072	7.94252	6.39845	7.07198	6.78999	6.47165	5.79077	6.3819	8.13613	7.99584	6.72617	7.53693	5.66336	6.91052	7.39056	6.54484	7.65063	7.10368	7.31959	4.73326	5.1225	7.4115	7.73952	5.02285	7.18406	7.59416
ENSG00000052749	0.60241	6.42346	6.49276	6.42587	6.60961	6.26326	6.68425	6.42582	6.47819	6.21806	6.59539	6.45807	6.40732	6.54361	6.45773	6.41696	6.52075	6.77485	7.24847	6.75804	6.88247	7.35745	7.10849	7.07353	6.91071	6.8828	7.02	6.81207	7.25564	7.01347	7.46414	7.13117	6.81832	7.05156	6.97079	7.10792	6.83489	7.25851	7.28045	6.77059	6.88447	7.29733	7.488	7.21941	7.05002	6.80256	7.25633	7.08912	6.984
ENSG00000052802	0.853817	8.76533	8.40991	9.22487	8.78991	8.93634	9.20313	8.93953	8.62288	10.0418	9.62667	9.18722	8.87043	8.62038	8.7108	8.34808	8.72329	9.09535	9.51928	8.01798	6.67881	4.65766	7.94501	5.96302	7.11175	7.02144	5.87486	8.23087	8.37952	10.8112	5.01668	4.96956	8.18461	7.91978	6.95974	9.25132	8.20622	7.50415	6.97973	6.03681	6.86519	6.75018	4.34917	5.56908	9.80285	8.7079	5.6488	6.39951	7.61161
ENSG00000052841	0.705917	6.74383	7.01857	7.13061	7.22822	7.26509	7.22349	7.11155	6.83125	6.71939	6.62641	7.26612	7.16081	7.57723	7.61805	6.98927	7.47978	6.2357	7.51814	7.19646	6.99238	6.88822	6.96729	7.49404	7.51365	6.82693	7.08933	7.86273	6.71771	7.69628	7.27037	7.27781	7.53806	7.09564	7.3924	8.31382	7.55645	6.92769	8.19039	7.80994	7.98365	7.25318	6.90378	7.67247	7.27496	7.69348	7.1256	8.28171	8.66685
ENSG00000053108	0.612105	5.73296	5.64506	5.71965	5.71418	5.67485	5.50525	5.68712	5.84033	5.71536	5.59811	5.64343	5.63668	5.81414	5.71514	5.76792	5.77952	6.16319	6.49307	6.23781	6.13738	6.63248	6.46038	6.09722	6.30552	6.46078	6.22938	6.14453	5.90852	6.20283	6.49489	6.44973	6.19062	6.35559	6.65285	6.36694	5.95207	6.16432	6.01489	5.97187	6.34715	6.17525	6.41363	6.3438	5.94814	6.17088	6.54215	6.31388	6.49323
ENSG00000053371	0.79076	8.45074	8.29851	8.66328	8.30155	8.7666	8.87018	8.95973	8.13399	9.51543	9.6278	8.69698	8.67263	8.48785	8.48532	8.49263	8.74355	8.64997	8.50757	7.9168	7.81201	7.59183	7.87818	8.15108	7.32328	7.92568	8.38173	8.27912	7.31817	8.26817	9.40318	7.16566	7.94399	8.46791	7.91966	7.9893	7.9563	8.3573	7.41032	8.10896	7.83095	7.24068	7.31985	7.8765	7.86472	8.44073	7.54365	8.06346	8.11603
ENSG00000053372	0.706528	9.26712	8.74051	9.11123	9.24743	9.06008	9.07788	8.7936	9.1876	8.50371	8.46747	9.2527	9.21722	9.17158	9.1311	9.028	9.05199	7.95832	7.28853	7.33038	7.28867	7.90738	7.53701	7.46046	7.05323	7.24893	6.96229	6.9536	7.60722	8.03337	7.70911	7.11222	7.14468	7.06826	7.21833	7.17563	7.46221	7.45065	7.89763	6.8204	7.11622	7.25099	7.11741	7.15586	7.29792	7.11701	7.29697	7.1066	7.06368
ENSG00000053438	0.76864	7.75108	7.81306	8.25147	7.87966	7.76173	7.26742	8.11129	7.71731	6.80483	6.90866	6.57387	6.50704	6.65932	6.38589	7.08974	6.90615	8.66872	8.46051	9.285	7.93488	7.82725	9.06154	7.19418	9.30445	8.47729	8.02415	8.5003	10.7523	7.84921	8.52683	8.00347	9.03309	8.21389	7.62702	7.2171	7.25218	7.10427	7.33993	9.86376	8.38653	7.63303	7.70606	8.29648	7.52253	8.43383	7.50187	7.32176	7.41905
ENSG00000053524	0.82917	3.7609	3.86889	3.84431	3.87864	3.80586	4.20991	3.76831	3.85057	3.87032	3.83811	3.9197	3.82242	4.04598	3.88959	3.78735	3.88679	3.82171	3.81705	3.98739	3.80678	3.81238	3.85897	3.86495	3.94347	3.93629	3.90747	3.84287	3.97063	3.81488	3.8759	3.8232	3.94184	3.83061	3.73703	3.79934	3.76642	3.83921	3.74909	3.96492	3.833	3.8203	3.8537	3.84592	3.78279	3.95909	3.89425	3.81677	3.83826
ENSG00000053702	0.34429	5.71271	5.58019	5.50268	5.4786	5.61018	5.42419	5.61879	5.87921	5.70401	5.71251	5.6067	5.68871	5.30928	5.47022	5.7384	5.47423	5.53594	5.81552	5.74171	5.66796	5.70969	5.66434	5.66756	6.545	7.99013	5.53669	5.70957	5.70351	5.79927	5.70813	5.86275	5.63317	5.60466	5.71064	5.78174	5.49624	5.59229	5.62738	5.51471	5.6139	5.42031	5.61545	6.02068	5.44813	6.09563	5.42659	5.64067	5.42267
ENSG00000053747	0.770906	5.46029	5.80076	5.72921	5.60649	5.2754	5.6278	5.58293	5.84341	6.58794	6.94754	5.42647	5.48944	5.69838	5.34546	5.66465	5.60878	5.90416	6.49823	6.22787	7.24131	6.5113	6.28575	8.55363	6.20494	6.26123	7.41962	6.37394	6.20091	6.1086	7.55606	6.65379	6.38033	8.42038	6.72081	6.41721	8.50778	6.47319	6.58092	6.40939	8.89017	7.79387	6.77465	7.01951	8.52847	6.63897	6.18415	8.27345	6.63398
ENSG00000053770	0.847087	8.89337	8.22031	8.42736	8.23001	8.88663	8.58681	8.68078	7.74738	8.24197	8.15121	8.66235	8.50858	8.12842	8.4407	7.41224	8.1906	8.28527	6.0619	7.84115	7.0945	5.23027	6.91327	7.09503	8.08294	6.19051	8.08092	7.85119	5.60898	6.73409	5.5321	7.50464	8.07549	8.02562	8.48867	7.22769	7.15052	6.84527	6.56283	8.41965	5.92835	7.60468	6.26364	5.3195	7.5022	7.59018	7.26157	7.68104	6.85882
ENSG00000054116	0.683381	8.33138	8.12218	8.33188	8.48288	8.31589	8.26485	8.32191	8.19009	9.81957	9.48615	8.74716	8.33219	8.56168	8.69463	8.4932	8.55471	8.18344	8.44417	7.61457	8.46238	8.05136	8.6057	8.29911	7.59911	8.6074	8.2842	7.55247	8.14036	7.78166	7.85721	8.0669	7.64523	7.91111	8.39403	7.73713	8.24618	8.37712	8.13795	8.13741	8.57094	8.40528	8.02321	8.2575	8.52401	7.70196	7.83709	8.43546	8.73644
ENSG00000054118	0.700864	5.26434	5.5841	5.83419	5.72012	5.65463	5.47152	5.62584	5.60379	5.66384	5.37611	5.61119	5.66265	5.40736	5.52645	5.60027	5.39994	5.97184	5.53956	5.08859	5.26786	5.50284	5.21691	5.74409	5.59659	5.20403	5.45606	4.8347	5.57651	5.31982	5.37617	5.73411	5.51871	5.7991	5.37762	5.50897	5.19364	5.04801	5.37757	5.05168	5.10705	5.85508	6.32259	5.81877	5.68932	5.21177	5.30285	5.32492	5.78342
ENSG00000054179	0.693109	5.20971	5.25737	5.26239	5.30143	5.02391	5.14841	5.08935	5.52262	5.24739	5.08372	5.06832	4.96049	5.30748	5.03406	5.60975	5.26467	5.44641	5.45527	5.00345	4.92189	5.29888	4.9254	5.11547	5.15483	5.09864	5.01528	5.0558	5.24995	5.1934	5.02933	5.26657	5.01943	5.6201	5.0674	5.18012	5.12897	5.12074	5.33697	4.91132	4.92416	5.01616	5.13813	5.44983	4.98774	4.851	5.10924	5.28575	4.86484
ENSG00000054277	0.740594	6.18086	5.85806	5.9915	6.11298	6.18408	5.71497	6.15388	5.84671	6.56983	6.50943	6.55162	6.07113	5.86355	5.83756	5.97403	5.95409	6.87563	6.04339	6.44771	5.83519	6.32817	7.04823	6.32495	6.43906	5.68215	7.07469	6.13725	5.98319	6.49612	6.35767	5.98902	6.77145	6.18157	6.48436	6.45633	7.20266	6.45473	6.46455	6.55804	8.03746	5.85671	5.99246	6.0088	6.36603	5.96556	6.21071	6.12229	6.4535
ENSG00000054598	0.965199	7.13427	7.01745	6.98929	7.81933	7.11449	6.61688	6.61178	6.89042	7.47439	7.41079	6.64615	7.06497	6.97446	6.43641	7.03528	6.92197	8.01462	7.71857	7.4516	7.91479	7.45975	7.58943	8.11771	7.80093	7.55782	7.37737	8.16374	7.21007	7.28466	7.1868	7.64098	7.25474	7.14906	8.47417	7.5994	7.39733	7.69116	7.10963	8.12221	7.50282	8.1043	7.18771	9.60715	8.51399	8.33126	7.37875	7.39706	7.24232
ENSG00000054611	0.784625	7.72257	7.683	7.86151	7.8098	7.77228	7.78712	7.77968	7.55073	8.15796	7.99868	7.83709	7.67883	7.72045	7.76363	8.03661	7.68687	7.55295	8.00612	7.97855	7.65427	7.89888	7.82995	7.8634	7.91982	7.74703	7.95211	7.92973	7.47778	7.61188	8.05813	7.7456	7.83664	8.13248	7.74426	7.65595	7.79543	7.50117	7.92423	7.95134	7.977	7.66347	8.00121	8.19945	7.79154	7.98275	7.97953	7.91607	7.65193
ENSG00000054654	0.786281	7.18613	7.80689	6.9627	7.51404	7.8555	7.74281	7.65356	6.88613	5.5566	5.33631	7.50747	7.51553	7.66847	7.7711	7.48722	7.90688	6.89566	6.86297	6.53094	7.49596	6.97608	6.12864	8.66673	6.52857	7.2166	8.74961	6.535	7.291	6.13436	8.01375	8.70742	6.64954	7.39418	9.79723	8.04959	7.54016	9.49671	10.1157	9.08988	7.95555	8.30962	9.79142	7.30761	9.29567	6.80154	7.79128	7.98345	9.15731
ENSG00000054793	0.943737	6.54993	6.31514	6.4012	6.4857	6.47537	6.551	6.49129	6.33442	6.84301	6.72628	6.53569	6.70212	6.09562	6.54365	6.61094	6.40242	7.16877	6.34303	8.09828	6.94454	5.74823	7.80378	6.80487	7.82688	8.04818	6.98427	7.61012	8.40003	5.86395	6.61377	6.10605	8.02656	6.63766	6.23359	6.27759	6.50874	6.7948	6.76732	7.13516	5.703	6.63366	6.28529	7.10315	6.38327	8.04066	5.95499	6.84249	6.89071
ENSG00000054796	0.586924	4.20354	4.27693	4.1332	4.27597	4.20257	4.39031	4.21577	4.30091	4.22231	4.36305	4.09264	4.24644	4.30612	4.22361	4.32814	4.65492	4.3491	4.5516	4.20521	4.03864	4.39149	4.19879	4.03946	4.31623	4.25647	4.17232	4.19075	4.22207	4.26284	4.22769	4.40061	4.14854	4.18627	4.27249	4.23181	4.12427	4.16327	4.05383	4.18644	4.24426	4.14671	4.22194	4.29216	4.10344	4.13734	4.2852	4.15996	4.98186
ENSG00000054965	0.805571	5.76026	5.73217	5.72332	5.85471	6.07678	6.01922	5.78016	5.86945	6.10649	5.88358	6.02568	5.96954	5.69649	5.86175	5.86643	5.59456	5.92677	5.99059	7.17692	6.16378	5.57566	7.23401	6.35756	6.80346	7.6664	5.95729	6.96991	7.8225	5.62354	6.09894	5.82138	7.30264	5.65113	5.86813	5.50279	5.73553	6.40651	5.61293	6.15139	5.59699	5.8601	5.9086	6.11036	5.69034	7.37035	5.69478	6.07435	5.59227
ENSG00000054983	0.258577	6.73519	6.61129	6.67492	6.80538	6.96589	6.79004	6.82494	6.81591	6.79738	6.90073	6.50019	6.64649	6.85853	6.89074	6.31884	6.47965	7.17412	6.68285	7.1909	6.64809	6.81833	6.68023	7.02189	7.0065	6.31339	6.88055	7.78357	6.7761	6.52378	6.49478	6.36031	7.1825	7.61387	6.83595	6.48859	7.49133	6.90244	6.53145	7.13439	7.08177	6.47242	6.21324	6.11321	6.34414	7.35524	7.14757	6.91582	7.4338
ENSG00000055118	0.747588	6.37457	6.55524	6.4917	6.4576	6.38189	6.54404	6.3813	6.43575	6.13568	6.19581	6.61946	6.54869	6.83622	6.59252	6.55374	6.58245	7.26344	7.11425	7.4194	7.81481	9.15097	7.67069	6.1307	7.5339	8.89413	7.53792	6.8216	7.52266	9.35939	7.28729	8.32705	7.68345	7.0214	6.34107	6.55293	6.52905	7.2887	6.80178	9.1291	6.33336	7.19817	6.48954	6.87601	6.10899	7.23991	6.6826	6.61858	8.17161
ENSG00000055130	0.441664	9.01611	8.56071	8.22938	9.26054	8.59069	8.8689	8.94029	8.8671	7.89363	7.97248	8.72384	8.65596	8.04014	8.50426	8.26943	8.19697	8.27606	6.74407	7.83965	8.17906	7.5402	7.60092	7.54667	7.40098	7.46426	7.63377	7.64578	7.60866	7.45893	7.08976	7.46941	8.13093	7.14658	7.34673	7.87424	7.90162	8.30974	7.56178	7.57453	8.20463	8.24425	9.1739	6.24585	8.19425	7.36304	7.48838	7.70227	9.76422
ENSG00000055147	0.675165	6.2049	6.50332	6.34667	6.54391	6.44134	6.52628	6.41449	6.38169	6.79643	6.83396	6.52662	6.57173	6.67534	6.50602	6.11447	6.45132	6.83283	6.75561	6.2724	6.60159	6.57596	6.25069	6.30582	6.43892	6.17268	6.30471	6.32354	6.14869	6.83137	6.37625	7.02091	6.29498	6.77424	6.6132	6.1032	6.9671	6.41378	6.86902	7.14541	6.50858	6.88101	6.39974	6.67189	6.45624	6.5209	6.92788	7.07021	6.92737
ENSG00000055163	0.63316	7.66313	7.80845	7.81227	7.61291	7.86147	7.62493	7.86937	7.72806	6.77364	7.02836	8.1232	7.85737	7.7145	7.67495	7.65594	7.55282	8.18244	8.30025	10.7277	7.68029	8.85879	10.0956	6.88459	9.87282	10.5127	7.43738	8.71425	9.87613	7.22984	7.39675	7.65581	10.5853	7.54173	9.22449	8.09637	8.03535	7.16246	7.65901	9.36442	7.64713	6.98059	6.94405	7.12654	7.22054	8.77412	8.42743	8.72053	7.09649
ENSG00000055208	0.83711	7.55369	7.61512	7.30377	7.67157	7.56597	7.77749	7.4394	7.46841	7.49114	7.20853	7.63716	7.44886	7.3368	7.73427	6.92332	7.29749	7.61471	6.79997	7.59676	8.40061	6.92391	7.19809	8.06864	7.38362	6.99883	8.42461	7.65344	7.22551	7.22334	7.24645	7.89591	7.46466	7.77962	7.56428	7.93932	7.71541	8.36707	7.51551	7.32376	7.58921	8.13545	9.0419	7.21315	7.83141	7.73454	7.82942	7.76924	7.71108
ENSG00000055332	0.957815	8.56438	7.95702	8.33426	8.05443	8.53858	8.49094	8.35515	7.84683	8.33379	8.4269	8.15816	8.18751	7.96496	7.9467	8.09627	8.0498	7.4996	7.51734	7.77213	8.00955	6.97522	7.7502	7.85871	7.54549	7.59357	7.28253	7.64211	7.10962	7.42142	7.23722	7.05052	7.77183	7.79564	7.67738	7.14524	7.69817	8.03563	7.21895	7.88836	7.71932	7.76631	7.11064	6.76163	7.08508	7.91887	7.55791	7.58488	7.02454
ENSG00000055483	0.778718	5.4772	5.0756	5.0799	5.28793	5.22558	5.31321	5.25258	5.24242	4.95329	4.77816	5.70704	5.79012	5.59389	5.66507	5.18361	5.1543	4.86561	4.75972	4.50753	4.78603	4.8414	4.44452	4.94672	4.77435	4.73701	4.50208	4.58335	4.64716	4.771	4.56169	4.49694	4.43981	4.65647	4.34826	4.79412	5.31024	5.01383	4.67984	4.68444	4.7061	4.48917	4.49239	5.03682	4.86817	4.57296	4.47085	4.52606	5.33197
ENSG00000055732	0.85275	4.58498	4.89559	4.78757	4.88777	4.76653	5.11969	4.9203	4.67743	4.42748	4.73789	4.62936	4.93303	5.35337	5.03266	4.97661	4.89414	4.84596	6.20587	5.37821	5.15869	5.10051	5.49575	5.5166	5.21937	5.04572	5.65754	5.47245	5.16486	5.27232	5.35854	5.47804	5.57252	5.34831	5.16796	5.60227	5.49597	5.40014	5.28735	7.25672	5.24965	5.09499	5.39176	5.18656	5.77059	5.39536	5.30024	5.66307	5.39595
ENSG00000055917	0.296924	9.22852	8.48315	8.70583	9.07863	8.95238	9.06339	8.88182	8.60446	8.43163	8.20615	9.08603	8.97689	8.90898	9.05494	8.66668	8.92764	8.89328	7.63425	8.45605	8.97406	7.52228	8.38632	9.07108	8.17052	8.07825	8.7823	8.41925	8.45855	8.0522	8.10984	7.83737	8.73325	8.28003	8.03747	7.8675	8.4529	8.77888	8.0563	8.47578	8.81642	8.90459	8.05071	6.98985	9.01546	8.14105	8.53213	8.72455	8.14133
ENSG00000055955	0.292886	6.24489	6.26193	6.32661	6.13549	6.07917	6.3717	6.181	6.30312	6.38414	6.37816	6.12287	6.37601	6.37119	6.2565	6.41583	6.22235	6.61272	7.28008	6.87828	6.8274	7.31381	6.99246	6.73252	6.9485	7.11173	6.74848	7.01622	7.09119	7.32407	6.92709	7.11114	6.91886	7.01291	6.8905	11.1472	6.97823	6.82752	7.30128	7.04797	6.60731	6.95717	7.28017	7.47793	6.85037	7.02558	6.94427	6.95923	6.87975
ENSG00000056097	0.650715	6.84913	6.71901	6.80184	7.00077	7.0142	6.73992	6.57593	6.71198	6.82265	6.61877	6.82572	6.86012	6.68578	6.87496	6.71304	6.81434	6.59988	6.29193	7.12468	6.84072	5.86078	6.59785	6.78341	7.10306	6.39798	6.42477	7.12078	6.49442	6.48039	6.32322	6.6274	7.1412	6.40573	6.66202	6.27098	6.39003	7.15525	6.59948	6.73339	6.60581	6.71677	7.09117	6.11527	6.57099	6.73966	6.43238	6.48638	6.96607
ENSG00000056558	0.751615	5.52901	5.69398	5.71965	5.79793	5.42093	5.7536	5.47329	5.58924	5.54663	5.73105	5.50101	5.74344	5.68874	5.6756	5.58102	5.85799	5.82625	6.92051	6.3725	6.6604	6.2748	6.41694	6.4409	6.59004	6.54136	6.49275	6.49472	6.57217	6.57379	6.60573	6.71769	6.35295	6.63722	6.30924	6.90108	6.52009	6.6583	6.7495	6.75173	6.5021	6.32334	6.8683	6.78735	6.61368	6.54698	6.96809	6.70773	6.44797
ENSG00000056586	0.785321	6.34863	5.99069	6.37876	6.23924	6.2395	6.35293	6.17767	6.07583	7.22313	7.06358	6.26179	6.21239	6.17798	6.26932	5.75697	6.06006	6.59506	5.9937	6.05541	6.23123	6.13056	6.18634	6.36436	5.78042	6.12988	6.20245	5.86196	6.62056	6.23383	6.18603	6.22784	6.00119	6.35326	6.19692	6.09096	6.21503	6.29254	6.17487	6.00536	6.5547	6.32269	6.28069	5.84893	6.3492	5.58978	6.432	5.97314	6.66231
ENSG00000056736	0.933105	6.70761	7.07607	7.09568	7.20591	6.71618	6.8726	7.0032	6.97586	6.21249	6.15668	6.70608	7.19754	7.00159	6.85672	7.5867	6.96517	6.88147	7.01916	8.157	6.70361	6.84001	7.98486	8.24314	8.04233	8.44429	7.69475	8.24523	7.20611	8.31951	6.97175	7.26218	7.98985	7.83785	9.42812	8.44975	7.39204	7.01611	7.86277	8.04552	6.71049	6.93054	7.07548	7.44666	7.01963	7.95442	6.84547	7.1573	7.12214
ENSG00000056972	0.452552	6.28918	6.60887	6.47015	6.39911	6.55447	6.39557	6.55091	6.42295	7.31925	7.33325	6.40942	6.36192	6.73567	6.66163	6.26732	6.83819	6.38023	6.48199	6.18478	6.54492	6.29692	6.13417	6.74714	6.23762	6.04634	6.69935	6.16592	6.14695	6.3416	6.7065	6.31122	6.1287	6.5372	6.2854	6.32341	6.54854	6.42931	6.50489	6.60793	6.56426	6.76604	6.16011	6.62293	6.87694	6.23049	6.08158	6.71075	6.06861
ENSG00000057019	0.800261	5.73883	5.91971	6.08109	5.90386	6.08147	6.03302	5.84457	5.93766	6.59351	6.25871	6.09223	5.91578	6.02945	5.83428	5.94894	5.85855	5.85419	6.91877	6.57088	6.25643	6.64131	6.45549	6.6361	6.94762	6.32058	6.48748	6.34195	6.60552	6.36532	6.63598	7.2488	6.59652	6.58733	6.68851	6.86764	6.19425	6.427	6.6375	6.57217	6.42672	6.40266	6.65217	7.31355	6.44818	6.43913	6.45166	6.33643	6.62798
ENSG00000057149	0.129569	5.02239	5.09387	5.15011	5.09272	5.03073	5.07096	5.14255	5.09835	4.94961	5.10462	4.94037	4.94054	5.00819	4.93575	4.95139	5.06538	5.23412	5.78552	5.36042	5.41702	5.62748	5.6034	5.36035	5.39933	5.49473	5.69914	5.37124	5.62573	5.46622	5.636	5.87306	5.4585	5.51487	5.66817	5.63906	5.25368	5.49827	5.61058	5.26861	5.41596	7.38925	5.66026	6.00173	6.94631	5.43703	5.63168	5.50221	5.61216
ENSG00000057252	0.711324	4.99326	4.69352	4.65122	5.08688	5.24998	5.1138	4.79732	4.66909	5.16924	4.96099	5.21051	4.9535	4.99155	4.80533	4.8536	4.36103	4.89324	8.14315	4.59801	5.04372	4.80646	4.70048	4.67483	4.72332	4.24067	5.0387	4.79745	4.67344	4.60219	4.338	4.84622	4.49609	4.94328	6.23293	4.93272	5.70927	4.9685	6.06448	5.0335	6.02053	5.37341	4.65851	6.67685	6.32712	4.87388	5.46711	5.17839	5.02022
ENSG00000057593	0.273273	4.73207	5.20044	4.89734	4.96905	5.01075	5.16732	4.7762	5.44734	5.1456	5.03241	4.75049	5.21613	5.04445	5.02393	4.83066	5.1336	5.17971	5.65883	5.37312	5.14924	5.36469	5.1299	5.27381	5.40275	5.49552	5.21249	5.14741	4.90823	8.24239	5.24502	5.56188	5.16185	5.10967	5.53148	9.34973	5.21404	5.2633	5.14889	4.97532	5.27713	5.13989	5.46556	5.6687	5.14984	5.33637	5.50316	5.19038	5.12621
ENSG00000057663	0.813796	7.6868	6.96247	7.07514	7.0737	7.46896	7.37528	7.21738	6.78884	7.01591	7.0341	7.64989	7.10674	7.2002	7.48039	6.79576	7.43332	6.51225	5.91226	6.35469	6.61835	5.72633	6.22602	6.47718	6.05876	5.73041	6.73945	6.07371	5.85567	6.03418	5.82665	6.12713	6.23861	6.75889	6.46834	6.36571	6.39924	6.72795	6.26066	6.29042	7.11411	6.78881	6.39964	5.86398	6.45538	6.18939	6.53586	6.41379	6.30902
ENSG00000058056	0.949628	8.08163	8.18709	8.04522	8.5808	8.54938	8.3933	8.4021	8.30758	7.64105	7.45746	8.56905	8.46449	7.99652	8.38466	8.4478	8.31256	8.20081	9.20747	7.44795	8.09324	7.62279	7.52005	7.9941	7.70567	8.14297	7.36967	7.44687	8.15228	7.5923	8.09671	10.4023	7.47318	7.66099	7.22667	8.01866	7.99536	8.4274	7.8583	8.23812	7.22181	9.37809	11.8812	7.96422	7.5232	6.59026	7.54161	7.08177	8.42579
ENSG00000058063	0.911801	5.57445	5.35926	5.455	5.55735	5.48001	5.39731	5.56764	5.12018	6.03199	5.87969	5.37046	5.38296	5.44881	5.28852	5.20104	5.39388	5.49936	4.76553	5.33783	5.84399	5.05041	5.11692	5.85942	5.05232	5.38369	5.88527	5.74904	4.94947	5.6097	5.3453	5.02471	5.28033	5.92671	5.34709	5.49768	5.71134	5.90966	5.77131	6.2952	5.58835	6.30655	5.27818	4.90529	6.44082	5.39822	6.24999	7.21048	5.22123
ENSG00000058091	0.914958	6.1226	6.08886	6.18144	6.08056	6.34596	6.3694	6.02091	6.48375	6.29388	6.60291	6.46133	6.34307	6.00197	5.95778	6.0591	5.84129	6.21492	6.3355	7.62245	6.36848	6.45885	7.56726	6.76154	6.9746	7.03734	6.19106	6.46176	7.00201	6.76754	6.41349	6.47511	7.59662	6.36429	6.57768	6.18984	6.72073	6.84904	6.29817	7.02393	6.09522	6.52905	6.25697	6.25093	6.23237	6.83497	6.27318	6.51329	6.75594
ENSG00000058262	0.85081	9.4179	9.57158	9.72023	9.30355	9.50209	9.40999	9.70933	9.23283	10.5786	10.7762	9.43781	9.15649	9.09436	9.33941	9.72364	9.11659	9.47107	9.64478	7.98836	9.1084	9.05385	8.25044	9.14975	8.10368	8.87837	8.87334	8.14221	8.74815	9.28533	9.6144	8.75563	8.10316	9.16098	9.23097	8.91469	9.33733	9.7644	9.70651	9.3997	9.19289	9.71224	8.923	9.81501	8.93408	8.4951	9.11985	9.58836	8.55554
ENSG00000058272	0.729519	6.40054	5.99095	6.02211	6.07325	6.39474	6.21979	6.07553	5.90613	6.49752	6.39413	6.14693	6.17236	6.35086	6.28149	5.70727	5.97273	5.56873	4.65247	6.22098	7.83372	5.11003	5.821	6.57533	5.658	5.3209	6.41856	5.84455	4.79432	5.75247	5.53423	5.54941	6.42358	5.85933	5.21683	5.04761	5.89415	6.30516	5.18681	6.2575	6.36837	7.18812	5.57935	4.71514	6.46994	5.60821	6.4151	5.61681	6.37643
ENSG00000058335	0.847917	5.53184	5.83502	5.60898	5.7372	5.38342	5.79143	5.51219	5.86529	5.53563	5.75799	5.62677	5.72086	5.70747	5.66474	5.88976	5.75473	5.6742	6.15335	6.51729	5.79948	6.54227	6.46985	6.12372	6.27889	6.46614	5.98674	6.56219	6.58367	6.0719	6.80131	6.36782	6.45178	6.01023	6.11692	6.24928	6.61208	5.95642	6.20878	5.93471	6.03937	5.96195	6.13172	6.46031	6.0165	6.89212	6.2082	5.98623	5.93524
ENSG00000058404	0.711004	5.64773	5.73233	5.72015	5.73756	5.46115	5.64279	5.57028	5.73817	5.72006	5.93566	5.60957	5.65598	5.68612	5.515	5.65656	5.72375	6.06081	6.54938	9.36681	6.06529	6.43492	9.35739	5.98522	9.0817	9.99855	6.22862	7.46678	8.97026	6.19877	6.24805	7.62181	9.36803	6.27496	6.12311	6.6995	5.9741	6.02628	6.38631	7.62887	5.95131	6.26279	7.76372	6.37508	5.96101	7.26113	6.25941	6.21499	6.25568
ENSG00000058600	0.825847	9.4954	9.00592	9.48382	9.21952	9.60053	9.36153	9.60885	9.02091	8.46018	8.21404	9.54069	9.18852	9.03508	9.22636	9.42952	8.92633	7.81604	7.88186	7.47511	7.77106	7.14775	7.36791	7.92414	7.47787	7.64941	7.3751	7.81783	7.12411	7.73821	7.18773	7.29661	7.95119	7.02677	7.05793	7.44093	7.68649	7.89382	8.13891	8.45907	7.1363	8.39533	8.90468	7.43951	8.13733	7.56904	7.21146	7.70165	8.25403
ENSG00000058668	0.309346	7.48807	7.16424	7.12703	7.22312	7.37609	6.97559	7.22358	6.85673	8.77995	8.62799	7.12114	7.12979	7.41509	7.35949	7.25135	7.06083	7.87175	8.63926	9.05791	9.33562	7.81502	8.21241	7.85704	8.05081	7.68531	8.41809	7.75067	8.01142	7.38989	7.79255	8.72081	8.69508	7.79307	7.73777	7.73651	8.34483	8.62571	8.24376	7.91824	8.12127	8.36141	7.32748	7.42785	8.55881	7.90018	7.42047	7.33776	8.07954
ENSG00000058673	0.77843	8.80651	8.26284	8.22882	8.48246	8.65479	8.57313	8.3566	8.39376	8.80647	8.74665	8.58896	8.62235	8.7536	8.49125	8.4857	8.8072	8.65611	8.72297	8.68154	8.96556	8.81292	8.49229	9.29825	8.7459	8.72399	8.84252	9.05657	8.50975	8.746	8.89678	8.41573	8.79767	9.11429	8.84601	8.97651	8.74859	9.07977	8.66968	9.14182	9.10273	8.92536	9.68605	8.32095	9.26633	9.02752	9.09718	9.08788	9.45295
ENSG00000058729	0.726681	9.40914	8.46849	8.65049	8.66591	8.96256	9.09652	8.59244	8.25568	8.81669	8.5438	8.94732	8.56005	8.80375	8.71904	8.38527	8.6828	7.71558	6.47888	6.8013	6.97802	6.27175	6.43972	6.85197	6.77496	6.26214	6.81861	6.79184	6.33668	6.99067	6.52108	7.005	6.6448	6.63539	6.83477	6.70943	6.92698	6.94494	7.06707	7.22432	7.26322	7.52656	6.84088	6.21636	6.67265	6.72963	6.488	6.87071	6.96199
ENSG00000058799	0.659416	8.64665	9.02316	9.00328	9.20297	8.63174	9.116	8.93862	8.89141	8.84162	8.82545	8.74073	9.01508	8.75865	8.86478	8.64745	8.96648	8.99891	8.06993	7.90416	7.77389	8.47198	8.26126	8.38663	7.64775	7.79467	8.05838	7.98212	7.77116	8.16562	8.01119	7.99984	7.8475	8.07851	8.63915	8.83372	8.31893	8.1248	8.23328	8.07238	8.30382	8.52209	8.17747	8.38078	8.06691	7.69821	8.59175	8.73057	8.22339
ENSG00000058866	0.586512	5.97641	6.0149	6.2361	6.26624	5.91658	5.94713	6.05752	6.18545	5.99681	6.03494	6.22884	5.97955	5.98246	5.98439	6.33098	5.78997	6.20941	6.83817	7.41144	6.6592	7.27272	7.28408	6.35072	6.90118	8.68378	6.34689	7.03533	6.71868	6.65588	7.11836	7.06061	7.33947	7.02952	6.55644	6.75955	6.37338	6.67739	6.63837	6.76241	6.72582	6.53503	6.59765	6.92429	6.32616	6.64911	6.84009	6.71037	6.61562
ENSG00000059378	0.685815	6.55039	7.14569	6.93015	6.77833	7.1725	6.98326	6.92533	6.87321	6.21859	6.3388	6.68124	6.63009	6.98313	6.70234	6.52116	6.80993	5.57123	7.09941	6.04345	7.15047	7.26072	5.93639	7.22934	6.0456	6.02749	7.61824	6.40151	5.55389	6.82524	6.60511	6.26709	6.00609	8.49874	6.49382	6.89538	8.61102	6.78848	7.33329	6.98683	6.94708	7.13893	5.88575	6.70605	6.9645	6.53794	7.45344	7.42933	7.77172
ENSG00000059573	0.550029	8.61437	8.21491	8.3297	8.86195	8.44678	8.46576	8.50371	8.66274	8.1094	8.55227	8.318	8.6085	8.65641	9.02178	8.41343	8.58665	8.00005	7.09218	6.63103	7.32662	7.48542	6.88112	7.66908	6.33682	6.94672	8.20856	6.21033	7.63398	8.06962	7.80762	6.89846	6.60324	8.91436	7.70594	7.31573	7.37719	7.97945	8.23383	7.66786	8.11629	7.08838	6.75001	9.24507	7.66083	7.05498	6.8956	7.88539	7.28918
ENSG00000059588	0.710441	7.631	7.25689	7.35968	7.55693	7.70789	7.12571	7.5467	7.17955	7.41646	7.43589	7.57906	7.46285	7.74372	7.62318	7.32028	7.45921	6.84982	6.93578	8.33008	7.46045	7.34461	7.31404	8.04787	8.4014	7.62017	7.56375	8.05192	7.55683	7.59636	7.4245	7.24391	8.57004	7.48614	7.0067	7.62646	7.73562	6.73484	7.41086	8.77854	7.6578	7.20513	7.19199	7.58833	7.51406	8.08246	7.19084	7.71842	7.50792
ENSG00000059691	0.560973	6.9787	6.80859	6.76466	6.72681	6.74519	6.69752	6.82236	6.65748	6.93742	6.89664	6.77489	6.6508	6.27139	6.81327	6.47579	6.08708	6.72509	6.17323	6.35032	6.0784	6.28024	7.0128	5.97788	6.25633	6.87254	6.05079	6.74826	6.46736	6.34985	5.88917	6.78589	6.90758	5.70104	6.38268	6.26558	5.94785	5.84038	5.75183	5.95383	6.27014	5.94733	5.97029	6.01309	6.23049	7.68414	5.80916	6.22969	6.16031
ENSG00000059728	0.692675	5.53951	5.40025	5.64438	5.47579	5.49157	5.27335	5.48371	5.54514	5.60509	5.52882	5.61974	5.52177	5.4756	5.30508	5.56083	5.62507	5.57252	5.70983	5.66607	5.63531	7.02935	5.86646	5.88373	5.85608	5.8021	5.7672	5.61262	5.99099	5.75283	5.731	5.7196	5.67039	6.17756	5.72783	5.7507	5.70319	5.64615	5.70458	5.60474	6.01761	5.496	5.62517	5.59884	5.98196	5.82213	6.18894	5.81305	6.08064
ENSG00000059758	0.893045	6.46964	6.47541	6.21128	6.51268	6.27607	6.69255	6.15857	6.08093	6.96627	6.90855	6.31174	6.29904	6.49242	6.61206	6.19053	6.57185	6.91197	5.89735	7.66301	6.47735	6.02005	7.10855	6.61663	7.6241	6.50163	6.51671	7.6082	6.8358	6.36226	6.28569	6.08253	7.57716	6.12457	6.20531	6.47917	6.87538	6.47996	6.38857	6.39237	7.06227	6.54657	6.43129	6.1511	6.60827	6.88066	6.61435	6.27248	6.86517
ENSG00000059769	0.697202	9.48259	9.34208	9.15984	9.30369	9.55949	9.24338	9.09023	8.88651	9.71887	9.63672	9.19007	9.42427	9.04048	9.06018	8.43181	9.05865	8.69275	8.33822	8.96806	8.99301	8.51918	8.2349	8.10665	8.64182	7.46892	7.75537	8.93144	7.24046	7.67044	7.2383	7.84686	8.91451	7.87905	8.19612	7.55265	9.33479	8.2588	8.49297	9.86576	9.90425	9.04106	7.38357	7.71731	7.60885	8.67802	9.81248	8.16992	7.46727
ENSG00000059804	0.544028	8.34355	7.95222	9.30864	9.52941	8.8058	8.52337	8.42751	8.14693	6.79291	6.59988	8.16003	8.33738	9.03645	9.11063	8.15192	9.07463	8.18891	6.40494	6.93433	6.52451	8.78809	7.04264	5.65961	6.52914	7.16769	5.95002	6.12834	6.91204	6.03837	5.86578	5.93107	6.79373	6.18253	5.62312	6.92021	7.91029	6.55969	6.25648	6.19531	6.8917	6.83448	6.59378	6.00117	6.98549	6.96227	7.46951	5.93466	6.67481
ENSG00000059915	0.583935	5.62578	5.89864	5.69813	5.92219	5.65741	5.73795	5.60097	6.48067	5.72352	5.49322	5.56433	5.64316	5.59942	5.98944	6.07768	5.94327	5.88687	5.28198	6.99878	5.49096	5.4322	6.84718	4.93194	6.28856	5.76984	5.47806	5.3822	5.53855	5.2268	5.2723	5.0682	5.80888	5.20654	4.84933	5.01241	5.35451	5.26131	4.84742	6.69445	4.69322	4.8735	5.12719	5.34114	4.84289	4.9194	5.04244	4.96138	4.81215
ENSG00000060069	1.04517	7.23625	7.44085	7.46154	6.91742	7.72029	7.07516	7.50654	7.58811	6.79994	7.40783	7.78066	7.3506	7.44257	7.78291	8.09239	7.25964	6.94495	6.95161	6.68183	6.7599	7.08153	6.5472	6.74743	6.29641	6.78152	6.82204	6.81229	6.63301	6.42955	7.01042	6.58935	6.34768	6.47639	6.63501	6.56062	6.76782	6.48508	6.81448	6.51626	6.6235	6.98199	6.64715	6.92906	6.75396	6.71456	7.12945	6.31931	7.15922
ENSG00000060491	0.712225	6.78759	6.9297	7.05035	7.01231	6.64633	6.78367	6.83299	6.98372	7.1326	7.03803	6.92962	6.90575	6.86786	6.85944	7.07601	6.94745	7.35848	7.22113	7.17993	7.05471	7.30761	7.02646	7.05888	6.9191	7.13281	7.13353	6.79481	7.12504	7.08885	7.41216	7.1747	6.92556	7.38173	6.93608	7.3181	6.98748	7.32019	7.22093	6.77053	6.67201	7.05371	6.99061	7.38182	6.95607	6.96573	7.37014	6.99118	6.81299
ENSG00000060642	0.643007	6.57313	6.52446	6.95229	6.83831	6.57589	6.57017	7.05699	6.39913	7.53588	7.27942	6.59697	6.67551	6.45774	6.38559	6.49244	6.59108	6.81839	7.19181	6.58213	6.62514	6.86626	6.36417	6.91325	6.57996	6.62621	6.60998	6.60934	6.46296	6.99676	6.59749	6.33107	6.50518	6.74786	6.75707	6.71121	6.61357	6.2857	6.60348	6.97071	6.63798	6.59022	6.2397	6.98262	6.90755	6.68579	6.63308	6.82305	8.56624
ENSG00000060656	0.906362	6.73529	6.64357	6.83244	6.81822	6.92239	7.02432	6.78027	6.76831	6.42455	6.76917	6.69075	6.76528	6.55643	6.74033	6.62611	6.58483	7.28516	7.15167	7.31665	7.06328	7.04219	7.0927	6.67286	7.00722	7.37268	6.49821	7.12052	7.25273	6.71252	7.58338	6.88741	7.34449	6.84585	6.98007	7.1121	7.07375	7.19543	6.90263	7.0565	6.91956	6.84681	7.37109	7.25999	6.66675	7.39549	6.78681	6.94487	6.94412
ENSG00000060688	0.642396	8.08344	8.0378	7.79265	8.64382	8.36188	8.59731	8.29293	8.60739	7.25291	7.3995	9.01745	8.64418	8.17879	8.41086	8.74098	8.18064	7.62061	8.34269	7.58658	8.14017	8.66483	7.87592	7.95878	7.71108	8.24558	7.81732	7.625	8.50923	8.49644	8.2522	8.09072	7.36315	7.96769	8.11497	7.69623	7.94767	8.42822	7.91844	7.9801	8.02948	8.04452	8.14755	8.14813	7.9693	7.81966	8.30958	7.69712	8.4814
ENSG00000060709	0.140529	5.36999	5.3742	5.21367	5.51174	5.15642	5.47955	5.22689	5.37393	5.29337	5.19606	5.31943	5.41252	5.42881	5.37967	5.46824	5.37265	5.87218	6.60646	8.14584	5.68819	5.69552	7.71673	5.40012	7.29749	6.19555	5.76267	6.36828	7.69316	5.76514	6.13368	6.32615	8.06642	6.36368	6.17349	5.94179	5.54901	5.70979	5.76835	8.45907	5.49625	5.31877	5.90877	6.03557	5.67011	6.62497	5.95222	5.97176	5.92889
ENSG00000060718	0.465442	6.12188	6.3666	6.07398	6.05539	6.16138	6.04193	6.3775	6.01259	7.20468	7.29648	5.71243	5.43691	4.99965	4.65011	5.46867	4.60391	8.03879	5.07771	5.66299	4.94073	5.2315	5.44924	5.10691	5.66376	5.20532	5.11049	5.61786	5.37538	5.09813	6.12777	5.15816	5.90858	5.27237	4.966	5.32541	4.85459	5.14141	5.05354	5.82647	5.46453	4.73182	5.05026	5.39369	5.49779	5.62497	5.0128	4.95812	5.26767
ENSG00000060749	0.858817	6.03932	5.76919	5.73205	6.12838	6.02331	5.63393	5.96363	5.76555	5.48905	5.54965	5.73436	5.70317	5.61254	5.94914	5.90887	5.65642	5.72473	5.93925	5.59011	5.66144	5.6814	5.94483	5.91645	5.78084	5.69504	5.71953	5.71871	5.70005	5.90632	5.53458	5.95628	5.55088	6.07539	5.74388	5.72003	5.55424	5.50269	5.77859	5.68254	5.58872	5.6242	6.057	6.00119	5.58762	5.50914	5.55336	5.55552	5.88356
ENSG00000060762	0.894467	7.64185	7.51027	7.40713	7.28217	7.63189	7.54518	7.4659	7.54142	9.12259	9.14215	7.65415	7.42756	7.21515	7.09738	6.83994	7.11769	8.04131	7.81469	9.15613	8.51177	7.82603	9.45734	7.75249	9.38329	8.48982	8.91896	9.71789	8.30777	9.07891	7.03148	10.2378	9.04476	8.48481	9.55983	9.5081	8.49778	7.95667	7.8325	8.82192	7.77903	8.18783	9.24712	8.94794	8.12372	9.53329	7.72578	9.4699	7.51412
ENSG00000060971	0.613198	7.96236	7.80942	7.94687	7.63534	7.87813	7.76312	8.06937	7.68541	8.76231	8.65092	7.76339	7.51792	7.52875	7.54123	7.86093	7.5755	7.54661	7.75595	7.65527	7.56292	7.43977	7.81878	7.78432	7.61127	8.08039	8.25428	8.21803	7.20489	9.32592	7.5133	7.99359	7.82139	7.98708	8.18931	9.63933	7.94257	7.22886	7.30684	7.81324	7.51225	7.48714	6.83361	7.86226	7.85151	8.2728	7.57768	7.78115	7.1964
ENSG00000060982	0.427291	7.11313	7.12453	7.2995	7.3479	7.415	7.92444	7.34632	7.38692	5.95183	6.06069	7.33958	7.09877	6.73842	6.81949	6.80224	6.62758	6.0075	6.02567	5.80987	5.79246	5.93036	5.71757	5.64908	5.99048	5.63926	5.89154	5.79081	6.00576	5.88684	6.08844	6.11755	5.7809	5.92697	5.79079	6.03886	6.08288	6.408	7.81086	5.92367	6.96404	5.69557	5.8152	5.93197	5.66857	5.74047	6.37769	5.77775	6.09315
ENSG00000061337	0.291293	5.48016	5.52727	5.48574	5.45818	5.42157	5.39886	5.38288	5.59402	5.4204	5.3414	5.44575	5.40258	5.44952	5.36226	5.53687	5.51417	5.76228	5.78268	5.81224	5.40903	5.79676	6.02377	5.5483	6.19046	5.61263	5.48099	5.55733	6.06625	5.64171	5.78924	5.68967	5.90782	5.6484	5.6118	5.73266	5.56632	5.53966	5.73812	5.37129	5.57192	5.49139	5.87386	5.88888	5.49631	5.42713	5.6126	5.58626	5.5587
ENSG00000061656	0.746572	5.43226	5.42631	5.48852	5.29634	5.20946	5.2989	5.41548	5.25626	5.66542	5.56984	5.23333	5.30553	6.23469	6.44963	5.52304	6.56561	5.53617	6.49141	5.84039	5.97895	6.58423	6.20339	5.6179	5.78419	6.16378	6.54674	6.00027	5.78078	5.97419	5.81331	6.09787	6.18865	6.51459	6.15755	5.88328	6.02473	6.14364	6.82888	6.71956	6.34356	5.76836	5.983	6.57764	5.59335	6.11877	6.14765	6.64744	8.24116
ENSG00000061676	0.510653	7.56304	7.14033	7.42326	7.26019	7.52868	7.40082	7.40527	6.84681	7.73188	7.27558	7.06674	7.42071	7.19477	7.13266	6.97406	7.09304	7.04914	6.66066	7.36711	8.09021	5.64035	6.82495	7.26264	7.08359	6.66039	7.27299	6.86982	6.82985	6.80842	6.68764	7.0977	7.70636	7.04033	7.39772	6.63167	6.9087	7.56041	7.31343	7.24672	7.72998	7.64867	8.03138	6.60772	7.28352	6.84507	6.81682	7.01038	6.88082
ENSG00000061918	0.521391	4.91805	4.8756	4.70321	5.14563	4.72752	4.6965	4.67149	4.92986	4.95014	4.82388	4.92269	4.79786	4.71968	4.55716	4.85188	4.65385	5.72396	5.4032	8.1361	5.61004	5.2875	7.98499	5.4968	8.1041	5.97001	5.86908	6.22443	7.66448	5.72446	6.06333	6.40362	8.03501	5.25694	6.38552	5.22852	6.05562	5.37315	5.89447	5.72307	6.66466	6.13607	5.7023	5.31367	5.52133	6.32597	6.0141	5.2771	5.19928
ENSG00000061936	0.814647	7.39268	7.12865	7.25372	6.98175	7.38401	7.01023	7.23792	7.04916	7.1613	6.85488	7.55188	6.98786	6.97625	7.18561	7.31782	7.11079	6.9638	7.08393	7.59417	7.2289	7.33753	7.13945	7.53278	7.45504	7.41961	7.02685	7.97083	7.49624	7.07044	7.31516	7.07119	7.5888	7.23592	6.90438	6.99892	6.9025	7.33893	7.03679	7.21615	7.07809	7.06992	7.24976	7.23995	7.49335	7.59118	7.09095	7.15711	7.24168
ENSG00000061938	0.661522	6.28796	6.38661	6.53228	6.59295	6.291	6.5188	6.44054	6.56961	6.53625	6.61109	6.32634	6.35598	6.45786	6.52424	6.6719	6.41875	6.72094	6.74973	7.02623	6.48983	7.18034	7.1647	6.82014	7.10191	7.22777	6.62842	6.78281	7.04435	6.83719	6.97358	6.70779	7.28208	6.70224	6.6249	6.85055	6.7545	6.67164	6.76733	6.95406	6.57669	6.29507	6.7948	7.05197	6.67272	6.90708	6.58535	6.78538	6.68484
ENSG00000061987	0.750794	5.53365	5.44452	5.4565	5.51144	5.38343	5.60872	5.37831	5.44102	6.05487	5.85486	5.4242	5.47696	5.67531	5.53932	5.29918	5.55243	5.67433	5.30137	5.88132	5.92429	5.23958	5.69279	6.31525	5.97828	5.60293	5.89934	6.50387	5.29227	5.86986	5.77743	5.84959	6.00911	5.96251	5.76025	6.18748	6.01823	5.79603	5.99472	6.44379	5.99448	5.96888	5.54226	5.72217	6.2085	5.98962	5.90958	6.13134	5.90066
ENSG00000062485	0.57092	9.75636	9.845	9.9058	10.0793	10.3165	9.97095	10.0576	10.0982	9.56684	9.75573	9.94895	9.79493	9.73253	9.90403	9.82995	9.90139	10.0097	10.1273	9.61779	9.70369	9.75562	9.8317	9.02213	9.65982	10.1754	9.95427	9.09082	10.2391	9.56031	9.79385	10.7517	9.67249	9.51564	9.70374	8.73557	9.4755	9.36086	9.16039	9.27539	8.76926	9.70753	10.5443	9.52833	9.83659	9.32305	9.01258	9.68362	8.62398
ENSG00000062598	0.649625	6.7012	6.70232	6.79814	6.63293	7.05442	6.62304	6.99771	6.41862	6.99091	6.94442	7.07185	6.85471	6.81814	6.56026	6.70121	6.83349	6.96314	7.29743	7.8997	7.19323	7.24302	7.91118	6.95138	7.75444	8.51313	6.63751	7.92509	8.18127	6.9668	7.3648	6.74393	7.83967	6.43689	7.03278	7.03874	7.28908	7.4639	7.06534	7.23413	6.74807	7.19085	7.76049	7.07809	7.36438	7.96836	7.52648	6.97431	7.79251
ENSG00000062650	0.911419	7.45623	7.14465	7.10482	7.27744	7.33752	7.37357	7.1892	7.00244	6.86251	6.70272	7.28899	7.30022	7.25535	7.37569	6.90498	7.41888	6.62206	5.77593	5.89684	6.21341	6.05945	5.6043	6.49935	5.56702	5.72894	6.27736	6.01337	5.50905	6.48845	5.80199	5.76575	5.90648	6.0019	6.17669	6.03315	6.26665	6.41819	6.0437	6.04257	6.65967	6.47952	6.80312	5.12036	6.47326	5.91594	6.3634	6.16042	7.04357
ENSG00000062725	0.810769	5.67846	5.35451	5.36638	5.47169	5.58328	5.48051	5.54817	5.15469	6.74625	6.46292	5.72058	5.48911	5.38302	5.20189	5.50781	5.21032	6.16345	5.70881	6.02495	5.85711	5.48221	5.96787	5.87176	6.1147	5.93195	5.72092	6.24934	5.91274	5.53906	5.67455	5.61137	6.05131	5.65272	5.95969	5.63788	5.69167	6.21731	5.57885	6.07504	6.00074	6.1088	5.76071	5.44732	5.81952	6.12453	5.7148	5.80535	6.45442
ENSG00000063046	0.827609	9.29747	9.18084	9.37167	9.60742	9.67348	9.29399	9.51764	9.37904	8.49022	8.31555	9.64553	9.3915	9.4792	9.69088	9.68867	9.48048	8.7245	9.11486	8.1236	9.27969	9.00897	8.29238	9.6843	8.31026	8.17154	8.96553	8.26974	9.48741	8.89553	8.81277	8.74878	8.2358	8.93611	8.88522	8.33198	8.71923	9.68551	9.44922	8.81416	8.88189	9.10033	10.0361	9.07916	9.18473	8.41236	8.94399	8.87513	8.5721
ENSG00000063127	0.695417	5.56712	5.80112	5.76308	5.87109	5.69564	5.6489	5.69699	5.49378	5.4464	5.66866	5.8499	5.7679	6.06692	5.72805	5.85567	5.97587	5.92577	6.58456	6.32364	6.31146	6.51318	6.72871	6.59516	6.2197	6.1569	6.52872	6.33107	6.51673	6.37148	6.19408	6.80762	6.3332	6.51516	6.48084	6.45251	6.33913	6.265	6.32239	6.21689	6.17029	6.21493	6.16278	6.46746	6.17839	6.55394	6.32506	6.85197	10.2407
ENSG00000063176	0.725742	7.28839	7.68414	7.62781	7.67831	7.55966	7.39705	7.62362	7.59965	6.71996	6.84919	7.459	7.27518	6.9981	7.03752	7.90256	6.54875	6.90562	6.99094	7.37579	6.73741	6.76979	7.65562	6.71351	7.19607	7.66968	7.17778	7.47217	7.2766	7.10842	7.47131	6.52558	7.51797	7.21565	6.88366	7.01351	6.49678	7.11515	7.03116	7.24434	6.37199	6.62484	6.83016	7.14623	6.55099	7.5925	6.61458	6.89196	7.58807
ENSG00000063177	0.69326	9.69819	9.84835	9.8892	9.73663	9.78186	9.77546	9.91479	9.70733	9.34603	9.45221	9.72711	9.53464	9.8526	9.82554	10.0911	9.86027	9.9437	9.8063	8.73902	9.63364	9.8797	9.16624	10.0001	8.75297	9.71965	9.48457	9.05945	9.84003	9.47815	10.1764	9.03129	8.84216	9.32315	9.15937	8.96805	9.38279	10.1971	9.87777	9.5279	9.88013	9.55707	9.45906	10.0159	9.94731	9.10545	9.8494	9.82774	9.03016
ENSG00000063241	0.64156	7.95189	7.2648	8.6813	7.72093	7.80189	7.8305	8.07256	7.74869	8.14278	8.24966	8.83863	7.8198	8.33628	8.24049	8.11171	8.21026	6.84821	7.21825	6.58207	6.92051	7.74332	7.2658	7.09683	6.28626	7.28858	7.34566	6.68216	7.2521	7.67404	8.15749	6.6686	6.55496	7.5136	7.87616	7.79534	6.88133	7.48429	7.25685	6.85443	6.84721	7.50559	7.53731	7.05901	7.41659	7.15766	7.77047	7.04364	7.90963
ENSG00000063244	0.899035	7.63415	7.57929	7.5211	7.7455	7.7438	7.72263	7.71286	7.5674	7.4708	7.62363	7.44924	7.76176	7.71585	7.57791	7.8255	7.63528	7.41727	7.28592	6.93063	7.10294	7.61305	7.11049	7.54699	7.08507	7.41137	7.0513	7.26963	7.55972	7.5331	7.85889	6.91871	6.98088	7.25116	7.16079	7.19502	7.13461	7.49312	7.19101	7.43064	7.41644	7.10716	6.95484	7.23695	7.3438	7.25271	7.49393	7.33619	7.36795
ENSG00000063245	0.745037	7.78797	7.76641	7.4585	7.64988	7.49749	7.46465	7.21661	7.74876	7.41062	7.32177	7.43215	7.12825	7.51861	7.49778	8.05808	7.50329	7.29509	6.94571	6.86815	6.49757	7.67598	6.56966	6.69802	6.69213	7.04781	6.88396	6.70608	6.89107	7.21663	7.00283	7.11104	6.7272	6.93748	6.81776	7.1539	6.62702	6.83964	7.17327	6.73677	6.7769	6.73771	7.24798	7.39622	6.54859	6.58121	6.52877	6.75548	6.52512
ENSG00000063438	0.678393	6.96903	6.82257	6.6354	6.72194	6.70713	6.93715	6.84482	6.82974	6.85686	6.75596	6.75832	6.81532	6.93482	6.87739	7.07963	6.8407	6.54007	6.85204	6.77346	6.64492	6.82591	6.5422	6.93614	6.84696	7.17174	6.81756	6.87927	6.83183	6.6089	6.63351	6.37945	6.86216	6.85782	6.43771	6.52331	6.58022	7.03591	6.69894	6.96292	6.56165	6.4501	6.18908	6.64749	6.727	6.68244	6.70835	6.58586	6.78667
ENSG00000063601	0.766262	6.60907	6.39787	6.59317	6.63091	6.82494	6.6551	6.6886	6.56149	6.94821	6.90988	6.74217	6.61754	6.89577	7.03821	6.49393	6.49079	6.67511	5.92725	7.00589	6.39497	6.59919	6.45797	6.76012	6.37954	6.51911	6.16013	6.32415	6.92948	6.13155	5.95398	5.96294	6.78977	6.04369	6.31613	6.13926	6.4231	6.3745	6.43154	6.48596	7.38575	6.46532	6.71282	6.1895	6.90717	6.40193	6.70993	6.20265	6.40986
ENSG00000063854	0.871574	7.29556	7.13137	6.88477	6.98095	7.20327	6.8364	7.17453	6.85335	7.73199	7.55754	7.45843	6.92322	6.95183	7.44568	7.02709	7.297	7.83335	8.43864	8.29057	7.20138	8.66384	8.57558	6.88311	7.86944	9.04272	7.47026	7.89351	7.70943	8.36198	7.17471	7.71582	8.4359	7.33982	7.69215	8.62227	7.31274	7.05922	6.82088	8.18126	6.90273	7.50607	8.57391	6.80457	7.4582	7.98358	6.88038	6.87306	8.65304
ENSG00000063978	0.817335	10.0147	9.8367	9.62229	9.9832	10.2373	10.1316	10.0392	9.82142	9.79136	9.62622	10.3239	9.89222	9.9905	10.0923	9.81912	10.1548	9.19145	8.60628	8.8791	8.78723	8.83716	9.17057	8.6991	8.98329	9.19282	8.85012	8.74468	8.88761	8.26559	8.68131	8.11113	9.04311	8.5672	8.63875	8.17126	8.94026	9.19653	8.55981	8.9237	8.60038	8.75698	8.01246	8.66117	8.594	8.60867	8.91006	8.67025	9.38087
ENSG00000064012	0.251855	5.35577	5.56574	5.53293	5.19324	5.23161	5.2413	5.29471	5.0971	6.26543	6.1205	5.2144	5.20219	5.88654	5.64047	5.16027	5.58963	5.43714	6.37914	5.46108	5.98888	6.19348	5.61223	5.95555	5.78771	5.43559	6.03645	5.4247	5.41548	5.7251	5.63131	6.22837	5.56155	6.28926	6.41033	5.93477	6.4002	5.53955	6.16944	5.69104	5.81365	5.74186	5.68558	6.05542	5.75117	5.59775	6.94124	6.50663	5.5742
ENSG00000064115	0.925135	6.0343	5.6382	5.71787	5.80715	6.18948	6.16433	6.03635	5.93093	5.71682	5.51779	6.13994	5.6398	5.90061	5.57807	5.51993	5.65983	5.37831	5.89139	5.72167	5.70693	6.00507	5.94435	5.55522	5.45601	6.04699	5.34461	5.81318	5.64437	5.61225	5.44027	5.55998	6.02129	5.51149	5.62729	5.27927	5.73953	5.55592	5.48884	5.78132	5.57919	5.47109	5.40586	5.51531	5.68695	5.58067	5.29202	5.77786	5.24491
ENSG00000064199	0.605943	6.02403	5.83916	6.02601	5.83027	6.15857	5.74435	5.71365	5.49889	6.26446	5.68457	6.28602	6.03968	5.75443	5.74322	5.64128	5.98128	6.50211	5.47748	5.95719	5.40268	5.39405	5.78541	5.41928	5.70392	5.31081	5.68746	5.85333	5.59009	5.48804	5.35865	5.78988	5.96962	5.47938	6.00567	5.09548	6.02544	5.20682	5.50778	6.65746	5.10006	5.54036	5.46113	5.67848	5.37162	5.90298	5.06013	5.55383	9.58826
ENSG00000064205	0.302971	5.37286	5.25648	5.55344	5.50729	5.29141	5.22498	5.44146	5.41582	5.39777	5.39396	5.29122	5.28647	5.00427	5.52467	5.54227	5.27712	5.59562	6.97279	5.63169	7.05493	6.36464	5.75311	6.45635	5.81328	5.66159	6.28083	5.74367	5.84358	5.5164	6.13191	6.80068	5.51809	6.61131	5.91324	5.97172	7.18057	8.11961	6.29305	5.42305	5.84356	6.79248	7.05491	6.12527	7.05819	5.43047	5.91203	6.09434	6.75721
ENSG00000064225	0.646088	4.805	4.77864	4.68997	4.7677	4.67818	4.88058	4.7074	4.63489	4.22292	4.52127	4.73774	4.75847	4.86164	4.75592	4.72253	4.70328	4.73048	4.81809	4.85675	4.47627	4.613	4.78009	4.71875	4.93648	4.9934	4.55562	4.77022	4.58268	4.82503	4.51382	5.85567	5.08471	4.672	4.81307	5.6381	4.77623	4.43809	4.58439	5.15592	5.65327	4.87577	5.17392	5.34686	5.14507	5.24017	4.66015	4.88977	4.4499
ENSG00000064270	0.570586	5.50774	5.72197	5.6991	5.79238	5.7821	5.97498	5.59462	5.65536	5.38739	5.59039	5.51809	5.51105	5.61018	5.74808	5.95742	5.78707	5.55345	5.73077	5.84346	5.71719	5.95413	5.71961	6.01234	5.89698	5.79099	6.99854	5.67517	5.96726	5.66749	6.17014	6.07329	5.70145	6.38	5.77007	5.86543	6.04554	5.71597	5.68127	5.90321	5.48353	5.72558	5.85425	6.89822	6.44073	5.58607	5.78915	5.87896	5.6715
ENSG00000064313	0.649388	8.06427	7.57688	7.59716	7.43082	8.14376	7.71536	7.84286	6.97237	7.754	7.55872	7.96064	7.78874	7.68076	7.60989	7.60281	7.39165	6.86117	6.63992	6.43485	6.20776	5.22222	5.73597	6.68664	6.63047	6.32034	6.4352	6.69135	6.09509	6.38252	5.64689	6.3662	6.54261	6.08355	6.52061	6.45061	6.62881	6.62524	5.6531	7.0497	6.45571	6.74408	5.87756	6.27106	6.70061	6.67161	6.42696	6.89182	6.88379
ENSG00000064419	0.597413	9.00975	8.40121	8.55886	8.65557	8.83826	8.70692	8.62819	8.8691	7.82039	8.04828	8.79053	8.50772	8.25009	8.53939	8.50672	8.25859	8.12615	7.88556	7.54264	7.68805	7.9005	7.45843	7.449	7.52818	7.81513	7.46309	7.4505	7.9211	7.72569	7.20253	7.55419	7.71529	7.52135	7.67251	7.64068	7.40112	7.62722	7.42379	7.60418	7.24538	7.72281	7.83798	7.45613	7.66948	7.48609	7.58593	7.67961	8.30232
ENSG00000064490	0.66366	7.96846	7.77701	8.01695	8.02568	7.95394	7.92546	7.99827	7.99618	7.94111	7.84928	8.23329	7.85119	7.26293	7.66039	8.31528	7.67483	7.37426	6.67068	6.47095	6.86982	7.84735	6.93912	7.1677	6.24427	7.06366	6.98246	6.62779	6.64352	7.61107	8.58322	6.62673	6.35157	6.75109	6.85424	6.32063	7.31462	7.21745	6.40235	6.56112	7.01709	7.14437	7.10124	7.32692	6.99278	6.82954	7.21503	6.8433	6.08787
ENSG00000064545	0.553077	8.88354	9.3107	9.38595	9.45968	9.19518	9.46514	9.36459	9.39486	9.28814	9.44407	9.52073	9.3656	9.3001	9.29946	9.65175	9.27524	8.96715	9.38124	8.91357	8.84186	9.17715	8.92201	9.11554	8.79845	9.23712	8.88332	9.03716	8.96033	9.24514	9.61601	8.84966	8.9143	8.98792	8.98266	9.1916	8.85327	9.29291	9.18747	8.96489	8.8037	9.05536	8.92545	9.01284	9.11357	8.88171	9.04624	9.04243	8.65447
ENSG00000064601	0.836861	8.48001	9.0486	8.97915	8.80283	8.91395	8.72932	9.15305	8.64085	10.6573	10.8781	8.77773	8.77892	8.87707	8.89311	9.2243	8.83289	8.04022	11.2318	8.79799	9.09005	9.50389	8.89652	8.523	8.96037	9.10677	10.7892	8.5499	8.39179	9.21193	9.03084	9.27587	9.06006	9.56011	10.8769	9.35477	10.1335	9.20444	8.78418	9.37616	9.26708	8.92467	8.6722	8.86816	9.21678	8.81697	10.0724	9.08739	8.48937
ENSG00000064607	0.901875	7.56537	7.56072	7.35277	7.45617	7.35227	7.33116	7.37781	7.22051	7.35872	7.28058	7.19238	7.60824	7.74615	7.56923	7.68147	7.68928	7.1122	6.58313	7.39733	6.65988	6.98481	7.22594	6.9156	7.32065	7.83846	6.55558	7.11076	7.27203	6.90138	6.74006	6.71669	7.62602	6.45616	6.23455	6.50531	6.64516	6.79257	6.44964	7.78047	6.05148	6.68536	6.33147	6.55817	6.87352	7.09347	6.49539	6.62695	7.61218
ENSG00000064651	0.93175	6.68908	6.86789	7.05327	6.88284	6.76084	6.75803	6.85094	6.90445	6.99434	6.68677	6.95264	6.69837	6.84444	6.78641	6.6063	6.74336	7.29617	7.50836	7.54317	7.23841	7.07753	7.15662	8.23871	7.49353	7.34068	8.27404	8.02112	7.34192	7.17308	7.45787	7.43156	7.80105	8.19367	7.38611	7.3061	7.66182	7.37068	7.3435	7.6066	7.13047	7.60765	8.31392	8.20137	9.43714	7.45858	7.41668	9.21328	8.86893
ENSG00000064652	0.911536	6.2196	6.41307	6.38474	6.4974	6.62641	6.21478	6.59754	6.34123	5.91645	5.56508	6.42983	6.6062	5.89269	6.14823	6.2606	6.09694	5.86441	5.13377	6.3948	5.24404	4.88384	5.99474	5.11192	6.25707	5.72797	5.344	7.57383	5.17488	5.40282	5.36863	5.56317	6.75349	5.82005	5.60386	5.39097	6.47733	5.23018	5.38581	6.2229	7.74695	5.2476	5.28072	5.53036	5.65326	7.59175	5.27113	6.09835	5.25875
ENSG00000064655	0.71862	6.0771	5.80226	5.80433	6.25655	5.89005	6.24314	5.65618	5.47521	5.97769	5.90166	5.8612	5.7825	5.74997	5.57916	6.1296	5.63088	6.75383	6.04295	6.1238	6.21287	5.97295	6.16078	6.97799	5.88547	5.93247	6.59481	6.1928	6.04936	5.67028	5.99664	5.89527	6.05312	5.83291	6.15595	6.13442	5.90869	5.95348	5.87216	5.94401	6.27106	6.88408	6.34446	7.97182	5.89532	6.69012	6.03489	6.58127	6.7129
ENSG00000064666	0.436988	8.69307	8.97972	9.02424	8.82406	8.89126	8.88028	8.72038	9.0202	8.97606	8.79216	8.92308	8.90329	8.48555	8.9901	9.46546	8.94472	8.50413	7.70581	7.51155	7.71993	8.72756	7.33951	7.99999	7.27463	7.17421	7.70163	7.14927	7.35437	7.70142	8.99573	7.76919	7.3462	7.89738	7.49648	7.56746	8.37343	8.84452	8.05078	7.30448	7.63699	7.68394	7.65662	8.36897	7.88873	7.18896	8.44049	8.03971	7.23236
ENSG00000064687	0.581321	6.50342	6.40982	6.57601	6.4036	6.48856	6.1889	6.60059	6.7172	6.08202	5.94755	6.68445	6.23564	6.51589	6.43099	6.83735	6.47755	6.39127	5.97118	5.9076	5.49198	6.73129	5.77095	5.88807	5.85765	7.12586	5.70122	5.66021	5.79013	7.05156	6.08701	5.78814	5.76976	6.22165	5.65127	5.75344	6.38609	5.80696	6.18016	6.64054	6.12741	5.67773	5.80461	6.28776	6.51849	5.73929	6.16519	6.08545	5.83793
ENSG00000064692	0.807229	6.94629	6.857	6.63516	6.66885	6.85833	6.91056	6.7945	6.77469	6.54267	6.37094	6.77643	6.59088	6.5007	6.12537	6.43615	6.61159	7.3636	6.89651	6.98513	6.5547	6.31099	7.10354	6.76986	7.44414	7.75223	6.87454	6.96474	7.58744	6.57722	7.1846	7.13052	6.97082	6.81833	6.7653	6.71496	6.62134	8.34569	6.53078	6.96036	6.93852	7.37443	6.96299	7.04881	6.71697	6.88895	7.27919	6.50514	7.1979
ENSG00000064726	0.56958	9.16318	9.0901	9.18883	9.38183	9.3446	9.25164	8.82213	8.68519	9.89724	9.72384	8.94794	9.10926	9.09144	9.08704	8.99591	9.22967	8.77847	6.15603	9.37315	8.58755	6.60934	9.22524	8.25972	9.14371	8.64315	8.62438	9.27388	8.07107	8.06964	6.83149	9.45917	9.61592	7.39557	8.17105	7.77181	9.00823	8.73952	8.04149	9.35	8.2068	9.56141	10.5727	6.38378	8.06965	9.179	7.62674	8.10267	9.65689
ENSG00000064763	0.0901364	8.73405	8.15071	8.31754	7.99075	8.76566	8.54424	8.52209	8.31887	7.10789	6.97771	8.57619	8.71038	7.90349	8.17311	8.09879	8.08401	6.94955	7.65308	7.78594	7.29803	9.06034	7.82913	7.08959	7.87363	6.7557	8.33414	7.22233	7.66585	7.15794	6.99472	7.74965	8.01016	7.42741	7.29698	6.85908	7.64758	6.86965	6.89908	7.06198	8.04761	7.17276	7.27304	7.34784	8.59023	7.25833	8.17802	6.88913	8.34145
ENSG00000064933	0.910656	9.63738	9.01075	9.0795	9.47234	9.17347	9.22839	9.20603	8.47643	8.06955	7.60684	9.4582	9.69438	9.43302	9.31282	8.97196	9.30121	8.34204	6.19859	7.46074	7.38312	5.79328	7.11563	7.67569	7.51682	7.16405	6.31182	7.76743	5.75396	7.52494	6.97132	6.88473	7.79961	6.68024	6.72724	6.86954	7.37795	7.68499	6.43258	8.27054	7.31737	7.54884	7.25657	6.21595	7.32088	7.70372	7.3615	7.30025	9.62111
ENSG00000064961	0.669849	6.09626	6.60757	6.63386	6.66479	6.64115	6.44843	6.50681	6.1728	7.05676	6.61327	6.81274	6.47111	6.74684	6.92251	6.9928	6.69513	6.36542	6.64745	6.1842	6.59448	6.48437	6.03992	6.8203	5.97418	6.00597	6.4998	6.45556	5.95522	6.30803	7.48088	6.25979	6.19985	6.43741	6.56611	6.18951	6.25637	6.74005	6.06907	6.02467	6.3548	6.39638	6.23167	6.79818	6.74309	6.58347	6.03494	6.45673	6.69846
ENSG00000064995	0.786714	8.10926	6.82432	7.90941	7.72821	8.23756	7.54813	8.089	7.25776	7.54188	7.22303	8.30395	7.96937	7.9847	7.79733	8.1022	7.78168	6.52412	5.33193	5.71601	5.73932	5.6362	5.73448	5.94328	5.66063	6.12252	5.85809	6.05881	5.80137	5.91759	5.23389	5.26284	5.84517	5.98274	5.11106	5.50671	6.08013	5.66067	5.81682	6.23536	6.78483	6.32961	5.21736	5.40066	5.89736	5.93964	5.14527	5.58928	6.17961
ENSG00000065000	0.712681	8.29887	8.61962	8.3812	8.55298	8.71512	8.55782	8.48394	8.39497	8.16077	8.15731	8.73661	8.41992	8.22332	8.23986	8.43985	8.16307	7.72097	7.7433	8.38641	7.925	7.81201	7.73749	7.85151	7.736	7.97254	7.76976	7.70942	8.24633	7.75524	8.16554	7.49817	8.01985	7.68864	7.92525	7.41282	7.53947	7.9376	7.90993	8.15642	7.67121	7.82743	8.07437	7.83156	7.41034	7.62867	7.76915	7.43094	7.88247
ENSG00000065029	0.845061	7.02974	7.61223	7.44794	7.87378	7.33161	7.5329	7.55663	7.66299	7.56958	7.49879	7.3993	7.81906	7.85586	7.49434	7.49728	7.73737	7.88818	8.44807	8.07532	8.02737	8.2797	7.90483	7.90595	8.0836	8.32631	8.31753	8.09077	7.95339	8.12699	8.33133	8.30846	7.99706	8.11388	7.86615	8.16688	8.14026	8.19795	7.93501	8.6151	8.08139	7.98674	8.27838	8.45317	8.03946	8.13608	8.05105	8.17723	8.59024
ENSG00000065054	0.62746	4.54375	4.40071	4.73085	4.65702	4.42402	4.82954	4.57157	4.59147	4.56518	4.63708	4.57657	4.64977	4.51746	4.38579	4.56097	4.75926	4.66467	4.8277	4.71953	4.67565	4.48728	4.60113	4.56904	4.46395	4.8889	4.5297	4.52102	4.70589	4.53631	4.9039	4.6037	4.73004	4.61703	4.65677	4.82451	4.72225	4.87269	4.94465	4.81571	4.54636	4.53615	4.87233	4.95296	4.52554	4.65002	4.71829	4.6632	4.40417
ENSG00000065057	0.737549	6.64569	7.05555	7.35144	7.28105	7.03412	7.15669	7.33764	7.09411	6.21023	6.24694	7.68777	7.05903	6.87612	7.278	7.59476	6.99582	6.16917	5.4292	5.28251	5.13013	5.10078	5.63117	5.17211	5.69345	6.35751	5.12593	5.38751	5.60916	5.34828	6.65946	5.34095	5.46424	4.96459	4.77001	5.44671	5.49452	6.24934	4.79346	5.55527	5.33259	5.07722	4.92734	5.93724	5.05984	5.37262	5.25328	5.16211	5.15839
ENSG00000065150	0.258252	9.46714	9.03393	9.14698	9.23915	9.41059	9.44481	9.246	9.25245	8.38663	8.17682	9.3901	9.27742	8.81342	8.93416	9.01739	8.73921	8.13396	5.69016	6.81479	7.34688	5.65521	6.66572	6.58908	6.41042	6.12434	6.45733	6.697	7.00579	7.20488	6.40909	7.38804	6.92343	6.03667	6.72324	5.95664	6.55313	7.71675	7.55262	6.81874	6.74101	7.57163	7.79789	5.69976	6.80507	6.74261	6.6274	6.46705	8.40919
ENSG00000065183	0.689908	9.58853	8.90056	8.81656	8.81467	9.16958	9.39111	8.98444	8.84411	8.3877	8.50133	9.46135	9.43344	9.2926	9.43326	8.88519	8.96813	8.13964	6.61051	6.54636	6.52263	6.43927	6.34193	6.79325	6.59135	5.78265	6.56858	6.42448	6.55118	6.66952	6.38281	6.45468	6.58326	6.26549	6.60783	6.49597	6.51266	6.81742	6.91387	7.08302	6.51181	7.5778	6.83324	6.45265	6.83975	6.50094	6.54259	6.89497	6.94081
ENSG00000065243	0.858931	6.99212	6.70205	6.5818	6.53597	7.01439	6.76848	6.92452	6.38082	6.88298	6.69263	6.6566	6.82376	6.849	6.7062	6.36799	6.67176	6.68057	5.79906	5.89736	6.00589	5.32194	5.68759	6.47864	5.80505	5.48124	6.16012	6.09738	5.27108	5.83697	6.39623	5.96099	5.98891	6.25245	5.98009	5.76684	6.08592	6.28108	5.75501	6.66769	6.25126	6.14914	5.8491	5.4947	6.34683	5.75554	5.95627	6.07232	5.81634
ENSG00000065268	0.792765	7.32028	7.13624	7.63701	7.25036	7.31545	7.44439	8.11047	7.4201	6.71802	6.53143	7.88845	7.15159	7.09526	7.0562	7.86575	7.76856	6.89664	5.81044	6.0907	5.81361	6.34344	6.31715	6.24911	5.79212	6.84447	5.84358	6.14254	6.64385	6.59253	7.64628	5.05096	6.12051	6.10905	5.68226	6.21351	5.9214	6.04239	5.99338	6.16297	6.28793	6.1227	5.32667	5.52271	6.1498	6.01599	6.36594	5.35825	6.3037
ENSG00000065308	0.941236	7.43672	7.39593	7.52625	7.35402	7.93636	7.53717	7.94838	7.0856	9.98578	9.9627	7.55685	7.43104	7.04069	6.98143	7.1085	6.8119	7.10956	7.08606	6.77424	7.54961	7.60819	6.63717	7.59189	6.76893	6.75342	7.86267	6.76389	6.83347	7.42059	7.80256	7.32513	6.84837	7.9441	7.08857	7.23163	7.16116	8.29681	7.24268	6.74561	8.32758	7.3574	6.92763	7.02644	7.24498	6.82086	7.81162	6.99387	7.79072
ENSG00000065328	0.718946	9.16269	7.55036	8.51201	7.67413	9.00786	8.62516	9.00003	8.24278	5.45527	5.47942	9.1869	8.87553	7.81301	8.34827	8.54824	7.78566	6.79714	5.93291	5.51038	5.59207	6.70163	5.46111	5.43443	5.6867	5.69812	5.5543	5.49981	5.78943	7.23848	6.08801	5.59938	5.7044	5.57992	5.72606	5.56403	5.43474	5.63968	5.63948	5.59859	5.82549	5.38092	5.61039	5.66494	5.5079	5.58284	5.83764	5.75797	5.85003
ENSG00000065357	0.526754	6.22499	6.47713	6.21581	6.40868	6.36121	6.21507	6.29921	6.47404	6.98599	7.35692	6.1683	6.15568	6.10015	6.27083	6.46239	6.23689	6.34633	6.73454	6.49323	6.55141	7.36034	6.48974	6.38085	6.52848	6.4649	6.9283	6.23293	6.45218	6.33847	6.67794	6.44798	6.40384	7.59147	6.55469	6.56008	6.57291	6.52885	7.07689	6.11371	6.76924	6.28934	6.54479	7.21984	7.42858	6.36286	7.24598	6.6172	6.41459
ENSG00000065361	0.606566	6.43398	6.52377	6.76594	6.34173	6.70068	6.59468	6.90155	6.55696	5.40833	5.26221	6.47099	6.59801	6.48943	6.44981	7.24415	6.47467	5.71046	6.65465	6.86806	6.17821	5.94109	6.65135	6.92519	7.13761	6.01291	7.18683	7.39239	6.02964	6.82807	6.67927	6.21809	6.74931	7.1296	6.74749	6.34882	6.49821	5.69129	6.48006	5.70612	6.30238	6.25208	6.01897	7.19491	6.76681	7.24791	5.94491	7.27566	5.64087
ENSG00000065371	0.549758	5.06181	5.10863	5.09278	5.18487	4.867	5.20792	5.06992	5.12393	5.35748	5.37703	4.92927	5.08572	5.40806	5.17291	4.96276	5.16248	5.51737	5.47527	5.35254	5.73105	6.09979	5.5617	8.27534	5.42105	5.5013	5.75519	5.52027	5.88018	5.77398	5.69424	5.6055	5.32845	5.66324	5.46895	5.4695	5.49177	5.57239	5.8859	5.54384	5.38519	5.31549	5.37915	6.95102	6.81571	5.49528	5.68525	5.76701	11.8126
ENSG00000065427	0.88065	11.6203	11.4845	11.4191	11.4108	11.4108	11.5209	11.484	11.3639	11.0501	11.0082	11.4425	11.3523	11.3898	11.2162	11.0367	11.2515	10.9325	8.38512	9.10668	9.80313	8.70795	8.93995	9.81038	9.18275	9.14596	9.57554	8.95856	9.40397	10.0715	8.58884	9.41118	9.17932	9.43587	9.51356	9.14298	9.71863	10.1081	9.89932	9.9345	9.6945	9.85601	10.464	9.02618	9.71015	9.06115	9.86031	9.19472	10.6408
ENSG00000065457	1.00587	7.08582	6.86928	7.2685	7.05409	7.17792	7.13476	7.04653	6.99713	7.41888	7.35633	7.27577	7.24248	7.14172	7.32477	6.86616	7.01913	7.01266	6.28706	6.52313	6.44648	6.94752	6.40496	6.33841	6.49574	6.45973	5.9729	6.67801	6.44981	7.11161	6.1104	5.88782	6.47944	6.08235	6.16	6.26463	6.45493	6.16301	6.01084	6.61754	6.2017	5.94063	5.95056	5.72248	6.30435	6.29755	6.24121	6.44292	6.17568
ENSG00000065485	0.533062	8.70638	8.90998	8.71637	9.07263	9.22291	8.97437	8.97294	8.91787	10.126	10.1555	8.48237	8.67874	8.81611	8.70348	8.82734	8.76938	8.07683	8.17689	6.34483	7.76842	8.1897	6.5947	7.82529	6.37475	6.32712	8.18969	6.78229	6.53088	9.00899	7.89051	6.95206	6.24668	7.83271	7.72853	9.6475	8.32848	7.89841	8.43046	8.59279	9.53252	8.07668	7.10637	7.86846	7.46411	6.87318	7.94954	9.05409	8.44052
ENSG00000065491	0.606756	4.16404	4.10473	4.24871	4.31579	4.24552	4.37353	4.2274	4.24573	4.20212	4.25176	4.28174	4.32818	4.2758	4.28036	4.28808	4.22967	4.17695	4.39924	4.32493	4.26276	4.60746	4.20482	4.22397	4.30533	4.24715	4.29963	4.27406	4.5022	4.3202	4.45976	4.20071	4.41844	4.94828	4.4028	4.22198	4.19738	4.3546	4.32362	4.30087	4.35516	4.18977	4.50115	4.61419	4.39426	4.09494	4.208	4.19698	4.34283
ENSG00000065526	0.903704	7.59631	7.48466	7.72252	7.47846	8.32739	7.52089	7.93897	7.31171	7.0616	7.0248	7.51455	7.83785	7.49855	7.61899	7.83829	7.43542	7.59632	7.41154	8.22618	7.56716	7.31104	7.33012	8.05398	7.88073	8.05913	7.6557	8.56544	8.29291	7.18663	7.59756	7.15414	8.26198	7.29664	7.41645	7.35898	7.35544	7.73606	7.58063	7.98704	6.89371	7.64077	7.95267	7.3817	8.07735	7.91394	7.49978	7.32675	8.20815
ENSG00000065534	0.791365	7.45155	7.12963	7.10946	6.97001	7.77672	7.13297	7.8315	6.88017	10.7525	10.3915	7.48771	7.42832	7.15332	7.09855	7.55575	6.82857	6.90014	8.26315	7.69888	12.4554	6.73986	7.59186	10.4966	7.76706	7.19971	10.9517	9.35451	5.88954	6.62718	9.33531	6.88355	7.91503	9.76351	8.24909	8.08296	9.51887	11.392	8.17391	6.23444	8.48644	12.0046	6.60148	9.08569	9.13748	8.80489	9.10656	7.84865	9.08623
ENSG00000065548	0.882077	7.93123	7.61601	7.81818	7.93553	7.85646	7.71227	7.67963	7.72678	7.75418	7.57023	7.7977	7.85294	7.79907	7.98436	7.25209	7.86456	7.4218	5.95094	7.52355	6.88157	5.56672	6.85928	6.83863	7.16501	6.36306	6.78481	7.02216	6.03853	7.09082	6.20788	6.39326	7.56493	6.72398	6.87238	7.01805	6.89793	7.25815	7.09825	7.20817	7.35833	7.23735	7.09195	5.42906	7.40211	6.63963	6.61913	6.69875	7.27325
ENSG00000065559	0.697553	7.44651	7.26077	7.36547	7.30996	7.61842	7.6556	7.45511	7.27481	7.30754	7.26423	7.54331	7.53164	7.49153	7.41245	7.21911	7.40785	7.8314	6.02806	7.98263	6.70003	6.12442	7.58232	6.83679	7.0118	6.74207	6.63067	6.90682	7.45654	6.66855	6.29609	6.69248	7.87141	6.29156	6.66412	6.82105	6.84217	6.58504	6.45565	7.17549	6.91345	6.80259	7.03205	6.16347	6.95351	7.05919	6.89003	6.68515	6.76226
ENSG00000065609	0.831887	4.65479	4.98627	4.85495	5.18733	4.51572	5.19866	4.68514	4.81822	4.82301	4.69339	4.95431	4.82033	4.74561	4.83495	4.64379	4.73597	7.20319	5.39496	9.97661	5.60058	5.53519	9.91879	5.31003	8.21719	10.2901	5.17872	7.58295	9.55904	5.38422	5.30304	5.37392	10.076	5.1449	5.08699	5.40565	5.18685	5.26748	5.28293	8.38688	5.36591	5.23832	5.27445	5.62195	5.00853	7.85037	5.41405	5.01698	6.86648
ENSG00000065613	0.989835	6.85915	6.06346	5.67738	5.61982	5.91449	5.60154	5.7219	5.48592	7.60496	7.04775	5.80501	6.25863	6.06217	6.08056	5.39112	5.99815	5.6399	5.26796	5.62525	6.94456	5.3869	5.06301	6.5385	5.74458	4.93377	6.29101	5.66068	5.04382	5.61302	5.5487	6.08775	5.64845	5.34062	6.21861	5.31409	7.0782	6.27407	6.48159	6.34365	6.97126	6.97286	6.47149	5.04939	7.02873	5.66403	6.06645	6.60904	6.43954
ENSG00000065615	0.570776	5.77471	5.4518	5.46071	5.51359	5.52057	5.6906	5.31299	5.68763	5.30435	5.69572	5.38988	5.62595	5.74436	5.91269	5.06302	5.4782	5.56175	5.33918	5.64767	6.0297	5.95115	5.37925	5.82656	5.74012	5.32896	6.48927	5.94824	5.36853	5.29573	5.12735	6.04973	5.69816	6.46737	6.07011	5.5761	6.3881	5.4602	5.47013	5.91989	5.76416	5.97334	5.69137	5.08664	5.71043	5.45977	7.13547	5.92208	7.43213
ENSG00000065618	0.0884988	5.31372	5.2467	5.35483	5.24881	5.29866	5.58679	5.38842	5.3709	5.39605	5.3535	5.48056	5.15848	5.2791	5.32368	5.7691	5.18665	5.66115	5.73839	5.4688	5.57196	7.15395	5.52402	7.19918	5.92588	5.43321	6.45276	5.37226	5.78358	5.83041	5.70485	5.25509	5.58506	5.63125	5.27037	6.11566	5.77236	5.67572	5.92914	5.69319	8.03393	5.38805	5.67992	6.86713	8.4064	5.3858	5.83168	6.03188	5.91224
ENSG00000065665	0.954002	7.40194	7.4388	7.03331	7.3664	7.16286	7.02602	6.84951	7.69664	6.56436	6.61433	7.47844	7.52565	7.06169	7.52164	7.15982	7.48214	7.87476	6.13859	7.81715	5.95766	6.66935	7.94861	6.20469	7.32597	7.31648	5.89432	8.09857	7.63476	6.49852	6.34531	6.34604	7.79442	5.91401	5.80635	6.34329	6.04576	6.0943	6.09027	6.51432	6.09572	6.04536	6.35778	5.97455	6.14508	8.20814	6.06138	6.17661	7.73998
ENSG00000065675	0.25183	7.58332	7.32219	7.39194	7.32468	7.44473	7.32065	7.74873	7.65968	6.66829	6.66512	7.50501	7.52708	7.11809	7.27542	7.53049	8.0419	6.98235	8.0829	7.90104	7.56807	8.34973	8.21749	7.51946	8.14485	7.76247	8.16261	8.41778	7.91632	8.11744	7.99882	8.07934	7.91856	8.02749	8.26893	7.90653	8.04805	7.63071	8.51786	7.6507	7.43699	8.15425	9.78929	8.07126	7.5402	8.06638	8.14309	7.80537	8.06926
ENSG00000065717	0.712934	6.66765	6.7768	6.84981	6.72377	6.73913	6.86547	6.91409	6.73874	6.30151	6.6587	7.03382	6.7117	6.77273	6.94489	6.91332	7.26678	6.80711	7.80314	7.55299	8.66678	7.49355	7.31956	8.59982	7.31096	9.80598	7.58983	7.66761	7.602	7.17696	10.0649	7.63622	7.57228	7.10599	7.57089	7.26632	8.18996	8.00352	7.43317	7.36779	7.35942	7.69327	8.09737	8.55236	7.55918	8.35113	7.41607	7.38216	7.49823
ENSG00000065833	0.658895	5.56284	5.49625	5.69496	5.40851	5.65199	5.59585	5.64595	5.20615	6.45811	6.57015	5.25116	5.00809	5.3573	5.20237	5.01423	5.21354	5.34319	6.5579	6.62056	6.90226	5.4132	6.05696	5.20771	6.61575	5.58076	5.53624	6.51789	5.6207	5.59184	5.25022	6.00609	6.60595	6.50477	5.57505	5.66649	5.84533	6.23702	5.56845	7.04847	5.3383	6.17901	7.54636	5.42353	6.7341	6.74936	5.99975	6.54325	6.53222
ENSG00000065882	0.679711	5.82965	5.95112	6.10663	5.92098	5.99939	5.89619	6.07852	5.82545	5.55909	5.60082	5.98228	5.78956	5.88281	5.79888	5.94518	5.84584	5.90774	5.75328	5.69763	6.15864	6.21236	5.69164	5.9045	5.8206	5.7239	6.18706	5.6608	5.72566	5.67585	5.79446	6.28654	5.75733	6.01913	6.38453	5.88632	5.95367	6.1368	6.14324	5.68575	5.95878	6.0719	6.14626	6.08316	5.68487	5.74925	6.15111	5.72252	6.2666
ENSG00000065883	0.877744	5.58646	5.55134	5.607	5.68496	5.51765	5.59873	5.60442	5.74757	5.60206	5.63751	5.52249	5.59461	5.59808	5.54664	5.62841	5.54802	5.76173	5.63466	5.67792	5.65577	5.74391	5.64474	5.94252	5.66481	5.86964	5.64606	5.72904	5.72403	5.67779	5.79752	5.65102	5.81014	5.64257	5.6736	5.75213	5.5682	5.93309	5.8246	5.73505	5.71731	5.60303	5.72231	5.71618	5.8898	5.62291	5.73754	5.6243	5.88985
ENSG00000065911	0.713153	11.0712	10.5138	10.3301	10.4187	10.6783	10.7638	10.5527	10.5282	8.9499	8.75339	10.3391	10.4847	10.6098	10.5143	9.95454	10.2662	9.65563	5.72563	5.68665	8.91791	7.99383	5.4087	7.47319	6.13537	5.72556	7.70595	6.64443	6.68685	7.56333	5.48814	6.70822	5.99587	6.75997	6.87988	5.75547	8.50705	8.80771	9.50677	8.42509	8.43169	9.49258	8.6909	6.64329	8.13354	7.08567	8.25874	8.15225	7.8867
ENSG00000065923	0.748758	4.7099	4.81241	4.70248	4.84634	4.69186	4.54935	4.70247	5.00709	5.16885	4.93077	4.62151	4.82235	4.6965	4.91786	4.86544	4.96988	4.74255	5.10292	4.81841	4.58958	5.0319	4.72641	4.64935	4.74412	4.79951	4.63807	4.6888	4.62479	4.84338	4.68808	4.98262	4.83437	4.78012	4.71955	4.81961	4.63827	4.81959	4.77234	4.67791	4.62028	4.67724	5.52937	5.14193	4.59445	4.82245	4.99618	4.82123	4.80526
ENSG00000065970	0.877844	7.31111	7.73825	7.32516	7.46568	7.27919	7.44702	7.23423	7.51336	8.40269	8.05966	7.4772	7.45551	7.57342	7.55516	7.44447	7.69704	7.88005	8.49101	8.1149	8.62593	8.50124	8.15759	8.48068	8.26264	9.32736	8.24815	8.10437	8.823	8.48336	8.63525	8.36123	7.95577	8.20416	7.87964	7.56166	8.18035	8.46909	8.16934	8.36943	8.12751	8.46677	8.58588	8.21881	8.5826	7.74906	8.06848	8.11311	8.19496
ENSG00000065978	0.845837	9.66247	9.73331	9.78841	9.70824	9.84353	9.73951	9.82195	9.89202	9.53911	9.58944	9.78587	9.73208	9.71485	9.73652	9.81759	9.6777	9.65121	8.51555	7.89482	9.27824	9.14776	7.48025	8.64846	7.57573	7.83361	9.1858	8.23874	10.0211	9.49063	8.66012	9.12644	7.76335	8.72988	8.84878	8.31403	8.92377	9.11554	8.72769	7.59565	8.6091	9.17083	9.78776	8.3844	8.9199	8.24766	9.23032	8.79251	10.2057
ENSG00000066027	0.835274	6.58264	6.40593	6.60695	6.55696	6.52143	6.46242	6.46473	6.61559	6.36047	6.27528	6.32975	6.38749	6.44399	6.64212	6.39983	6.55478	6.40938	6.42958	6.86165	7.02031	7.1853	6.93662	6.93269	6.85019	6.50945	6.90975	7.01242	6.492	6.62879	6.93707	6.91526	6.76307	6.72406	7.0079	7.03668	7.09615	6.58805	7.06671	6.59093	6.80166	6.77309	6.92514	6.59457	7.04275	6.91333	7.26259	7.20708	6.40768
ENSG00000066032	0.117695	5.95046	5.84581	5.48232	6.08478	5.79836	5.74436	5.65524	5.9235	5.11963	5.43776	6.14137	5.99373	5.72656	6.09797	5.69236	5.77778	7.58971	5.3417	7.67659	5.28344	4.94579	8.13734	4.89428	7.14917	6.18829	5.27235	6.24656	8.35313	5.09236	4.91419	5.17711	7.77707	5.3803	5.09069	5.3374	4.84904	5.1271	5.4767	5.81758	4.92991	4.95582	5.13068	5.46765	4.84741	6.01958	5.14429	4.96138	8.1075
ENSG00000066044	0.916794	9.41665	8.92828	9.36175	9.24751	9.54216	9.50488	9.48556	9.34823	9.00541	8.7956	9.49551	9.45905	9.21504	9.54096	9.44512	9.25967	8.96785	8.53028	7.3122	8.37147	8.62969	6.87185	8.09718	7.31913	7.00476	8.2331	7.46923	7.44256	8.61745	8.8236	7.92227	7.15781	7.79052	8.24255	7.87351	8.10626	8.75121	8.07892	8.04236	8.26702	8.39085	8.38026	8.33178	8.2544	7.74354	8.32893	7.66596	8.85078
ENSG00000066056	0.181945	4.70625	4.43895	4.42858	4.58031	4.39681	4.59601	4.58438	4.80722	4.59407	4.8187	4.44215	4.55769	4.57379	4.54947	4.45109	4.68307	4.78769	6.19377	5.14735	6.49084	5.69045	5.65556	5.75686	5.47264	5.79935	5.30658	5.33379	5.70549	5.82138	8.86917	6.02047	5.19712	5.40955	5.84512	5.7556	6.95289	5.87389	5.60803	5.43838	6.72348	6.41539	5.82768	4.8967	6.03411	5.54315	6.78732	5.53129	5.02091
ENSG00000066135	0.642218	8.33812	8.47992	8.17491	8.53416	8.19239	8.63247	8.51847	8.96365	8.0198	7.98496	8.70188	8.62741	8.57792	8.72915	8.74575	8.74915	7.89754	8.23933	7.68659	7.78412	8.0613	7.80172	7.90574	8.16414	7.9058	7.86164	7.72531	8.09793	7.82755	7.96277	8.08529	7.67258	8.26675	7.77985	7.7989	7.56868	7.89382	7.68095	7.68849	7.66525	7.77802	7.96398	8.138	7.95554	7.78909	8.04546	7.90513	7.62115
ENSG00000066136	0.728139	6.85646	6.98423	7.1852	7.13187	7.09012	7.34951	7.22422	7.15551	6.61896	6.81272	7.14011	7.15651	6.98496	7.3347	7.2461	6.98491	7.40573	7.24792	6.64238	7.1702	6.99445	7.24613	7.33838	6.65149	7.35898	7.12653	6.30288	7.68122	6.96179	7.89485	7.34577	6.59924	7.04702	7.09277	6.52014	6.97703	7.02957	6.62783	6.52266	6.78517	7.30695	7.89068	7.28459	7.21091	6.7171	7.27805	6.85604	7.44867
ENSG00000066230	0.752665	5.62624	5.7528	5.7788	5.63606	5.52727	5.52817	5.85301	6.06236	5.78256	5.75569	5.62034	5.72722	5.60591	5.73586	5.69702	5.79046	5.78062	6.22726	5.82147	5.55881	6.51271	5.87761	5.91422	5.5932	5.7738	6.24425	5.72426	5.80242	5.95763	5.69317	6.10565	5.67963	6.39498	6.40159	5.85398	5.61391	5.86841	5.69794	5.46392	5.59807	5.62708	6.07913	6.04398	5.69531	5.78522	5.95776	5.72674	5.68454
ENSG00000066279	0.853647	8.07563	7.65297	7.93435	7.45451	8.44885	8.13381	8.22593	7.00264	5.0783	4.95416	7.99001	7.89547	6.84322	7.52824	7.26836	7.22637	7.24525	4.69727	4.9299	4.70241	5.16615	4.69147	4.70203	4.89131	4.64291	4.77906	4.95509	5.07467	8.21286	5.63093	4.68597	4.76761	4.91804	4.69923	4.84368	4.61083	4.61209	4.69516	5.08457	5.14389	4.74128	4.78428	4.79352	4.83261	4.58615	4.98508	4.71332	6.61932
ENSG00000066322	0.586999	6.62102	6.85237	6.99472	7.1663	6.85488	6.88029	7.08482	7.04119	9.00751	9.22628	6.8588	6.82503	6.98342	7.03371	7.27722	6.75918	6.83422	7.72871	7.36308	7.95675	8.16622	8.22752	7.69233	7.82837	7.74668	7.74141	9.4506	6.84197	8.34941	8.17753	6.85854	7.66133	7.57191	7.8595	6.7013	8.18502	7.88856	7.52125	6.72393	8.065	7.86457	6.54452	7.66427	9.0926	9.36746	7.70059	7.83274	6.77776
ENSG00000066336	0.158464	5.31343	5.68478	5.60857	5.50073	5.37888	5.47792	5.33636	5.96302	5.36585	5.56416	5.33061	5.39365	5.65103	5.78057	5.5329	5.47436	5.3865	5.7505	5.81109	5.72275	7.11243	5.79702	5.45042	5.48495	5.48441	6.00117	5.89163	5.28535	5.48129	5.53063	6.03876	5.68627	5.59033	5.96689	6.29272	6.20428	5.51269	5.82524	5.48444	5.80262	5.49894	5.71034	5.98898	5.4703	5.93459	6.42486	5.74766	5.37765
ENSG00000066382	0.274751	5.3103	5.16568	5.27581	5.1558	5.41706	5.24375	5.45719	5.18595	4.47466	4.4071	5.17318	4.86063	4.99802	4.97613	5.12389	5.49781	5.6915	5.15695	5.60283	5.13725	4.739	5.61796	6.01142	6.21951	5.41191	4.82434	5.04012	6.76197	4.71917	4.64351	4.88123	5.836	4.80703	4.93574	4.74296	4.55422	4.66644	4.81063	6.50483	4.56635	5.36943	4.98589	5.46575	4.54407	5.1109	4.85376	4.56458	4.76522
ENSG00000066405	0.333717	5.57226	5.77139	5.5748	5.64385	5.53119	5.66174	5.56935	5.68445	5.59246	5.62773	5.39988	5.66965	5.75867	5.41905	5.57431	5.68559	5.76115	5.99883	6.0077	6.01167	6.53662	6.22823	6.07838	6.21964	6.16715	6.09083	6.11256	6.08881	6.48902	7.50469	6.17559	6.07961	6.11754	6.10942	6.24817	8.16927	6.11315	6.25869	6.06355	6.08598	5.9433	6.13025	6.20865	6.05906	6.09397	6.0075	10.125	6.24414
ENSG00000066455	0.774065	9.03446	8.62675	8.20854	8.89407	8.74809	8.99453	8.42229	8.45996	9.43359	9.72032	8.60085	8.8109	9.3358	9.29421	8.06017	9.20144	8.33972	6.61101	7.46355	7.87366	5.59778	7.1039	7.98277	7.17777	6.60332	8.02427	8.04818	6.62141	7.85701	6.64821	7.64658	7.83805	7.34834	7.84293	8.16518	7.94775	7.93681	7.29262	8.11087	8.61484	8.22378	8.21031	7.01956	7.82888	7.6843	7.56879	8.06891	8.71027
ENSG00000066468	0.988408	6.38807	6.27422	6.27836	6.35581	6.34573	6.44918	6.26929	6.38855	5.43693	5.51305	6.2753	6.4265	6.44601	6.39485	6.46351	6.28191	6.49495	6.39618	6.48648	6.13698	6.11136	6.44244	6.32799	6.58246	6.41148	6.37423	6.96559	6.4451	6.30619	6.84355	6.09517	6.51832	6.00435	6.7334	6.26044	6.24908	6.20144	6.13973	5.98565	6.30224	5.97401	5.94172	6.6977	6.60444	6.8572	5.94784	6.08988	6.01456
ENSG00000066557	0.756909	8.36677	7.79495	7.93532	8.0302	8.02879	7.99663	7.98038	7.69589	7.52747	7.39838	7.9175	8.28188	8.20644	8.1147	7.68331	8.22114	7.75799	6.47927	6.9289	7.02377	6.37287	6.88311	7.06931	6.84484	7.02924	6.90295	7.12772	6.74343	7.37109	6.71582	6.66253	7.15695	6.99442	6.9152	7.1857	7.0473	6.81675	6.69727	6.94137	7.30256	6.81585	6.61144	6.19458	7.00574	6.87854	6.72314	6.88966	7.09199
ENSG00000066583	0.910971	8.70041	8.11755	8.02387	8.02267	8.34573	8.77018	8.349	7.70648	7.08686	6.80542	8.43589	8.49216	7.76091	7.65197	7.48465	7.15255	8.43144	7.82513	7.29442	7.21591	6.87986	6.86738	8.15774	7.21386	6.04247	7.38684	7.68983	7.23905	8.83257	7.26099	8.58402	7.2082	7.77306	7.66792	8.77017	7.5587	7.71175	7.22923	8.51525	7.57699	7.39805	6.60335	8.43414	8.3174	7.57371	6.93103	7.86507	7.21606
ENSG00000066629	0.992897	6.45001	5.74921	5.97306	6.32527	6.66523	6.33655	6.41484	5.7868	6.69501	6.44199	6.75641	6.0925	5.82809	6.05667	5.97596	5.7344	6.04681	5.03783	5.81418	6.61331	5.03306	5.58776	5.26497	6.98458	4.99913	5.71042	6.65591	7.01745	4.88856	5.3658	5.51693	5.9625	5.11589	5.33673	5.02401	5.5652	5.35029	5.18989	5.91039	6.28592	5.50581	5.59857	4.68455	5.35279	5.99379	5.05334	5.58294	5.23838
ENSG00000066651	0.582628	8.43214	7.8409	7.98773	8.208	8.48486	8.3122	8.15963	8.13586	7.16513	6.90287	8.54705	8.71119	8.58058	8.80379	8.03836	8.24858	7.25384	5.11624	6.37611	6.18896	4.95556	5.87555	6.38881	6.44535	5.50911	5.94362	6.71363	5.10935	5.49244	5.48632	6.11441	6.66109	6.15885	5.932	8.18274	6.37109	5.67159	6.01004	7.69555	6.28483	6.28747	5.22878	5.44367	6.10096	6.78419	5.41015	6.45302	6.73524
ENSG00000066654	0.505684	8.02449	7.39747	7.49869	7.44932	7.59017	7.85793	7.65259	7.11219	6.84658	6.72278	8.16875	8.22598	7.94232	8.01201	7.17904	7.85868	6.62852	5.35384	6.11993	6.78469	5.12416	5.86145	7.17234	5.86625	5.68438	6.57964	5.99445	5.24605	5.81557	5.76686	5.44226	6.10956	5.71181	6.28039	5.25027	6.37847	6.86665	6.13383	6.58716	6.69212	7.37099	5.58167	4.91587	6.51751	5.55716	6.12038	6.62044	6.54767
ENSG00000066697	0.436692	7.50665	6.30449	6.59765	7.64857	7.27489	7.21045	6.67037	5.95672	4.40978	4.42758	7.43806	7.58477	7.16953	7.58514	6.86717	7.29368	7.44093	4.13524	7.5723	4.44165	4.02272	6.53307	4.17053	7.54604	5.10402	4.19423	8.22542	7.48165	4.22935	4.23443	4.2841	7.77822	4.24021	4.1575	4.09972	4.1277	4.3356	4.02052	4.23345	4.67207	4.51837	4.2965	4.08283	4.1239	6.65408	4.05162	4.23432	4.6416
ENSG00000066739	0.831728	5.78939	5.1193	4.90091	4.89621	5.32209	5.23488	5.50932	4.92225	6.04375	5.60084	5.20471	4.96014	5.26697	5.18284	5.19699	5.06122	5.44906	4.91684	5.4381	5.29155	4.94261	5.0514	5.30529	5.0995	5.14985	5.22234	5.6804	4.93472	5.85044	4.94101	5.08885	5.37141	5.1598	5.58942	5.38981	4.90225	4.72299	5.49013	6.14246	5.07271	5.75819	5.48985	4.69456	5.74249	5.98039	5.17946	5.36965	5.84552
ENSG00000066777	0.882277	7.92002	7.4542	7.40052	7.24603	7.70535	7.65864	7.61186	7.53921	7.09298	7.18725	7.42385	7.51163	7.77018	7.83048	7.69638	7.78324	7.09484	6.62252	7.16286	7.46383	7.2214	7.06183	7.78173	6.8888	6.6527	7.51902	6.88845	6.75931	6.76373	7.01785	7.12142	7.00676	7.40308	7.61371	7.17445	7.36354	7.10318	7.28615	7.13861	7.64748	7.41527	7.60478	6.57846	7.60367	7.03213	7.38576	7.76607	8.41305
ENSG00000066855	0.688307	7.0851	6.49315	6.75753	6.90676	7.64033	7.12021	6.98592	6.75535	7.49244	7.15062	7.54584	7.07414	7.09167	7.4151	6.95285	7.04538	7.0907	6.79973	6.07335	6.61164	6.22195	6.30746	6.44429	6.24269	5.80013	6.69514	6.63497	6.51122	6.65347	5.99529	6.51653	5.9859	6.7901	7.60054	6.96915	6.33989	6.61068	6.55595	6.45114	6.79464	6.75357	6.6667	6.34472	7.12953	6.41694	6.18731	7.49724	7.20092
ENSG00000066923	0.707538	6.12084	6.3156	6.22891	6.17844	5.96634	6.17385	6.1466	6.19809	5.76375	6.09226	5.82321	6.10854	6.39691	6.19125	6.30786	6.73339	6.15883	6.2438	6.05349	6.07578	6.6013	6.16192	6.21222	6.3953	6.14814	6.27787	6.31423	6.17663	6.2621	6.23299	6.18975	6.0698	6.19349	6.14286	6.3382	6.23815	6.31957	6.29885	6.22587	6.03204	6.13067	6.22077	6.5885	5.87009	6.34026	6.9761	6.43241	9.35811
ENSG00000066933	0.850959	8.26721	8.23526	8.36633	8.22231	7.95286	8.32065	8.42804	8.25892	8.48618	8.26228	8.10582	8.092	8.49395	8.43424	8.54828	8.25134	8.55032	8.41051	8.01069	7.90727	7.95208	8.39494	8.15834	8.08159	8.27626	8.1335	7.70424	7.84662	7.9692	8.03182	8.20438	7.76975	7.98988	8.12334	8.21602	8.03489	8.09626	7.76287	7.95285	7.39607	7.64587	8.04171	8.21472	8.13155	7.61415	8.14666	8.0828	8.69561
ENSG00000067048	0.443083	8.54945	8.2546	7.91042	8.06593	8.14242	8.47459	5.19748	5.03634	7.40701	7.13041	5.21667	5.25624	5.00859	4.91384	5.1462	5.19125	7.35004	5.93804	6.25814	6.97588	5.32603	5.79804	5.22095	6.47411	6.21321	5.03741	6.43475	5.47307	5.87682	5.40895	6.06948	6.26104	6.21465	6.05252	6.67437	6.92088	5.12459	6.46539	6.87688	5.04583	6.91636	5.20855	5.39929	7.23273	6.34782	6.56843	6.67695	7.57462
ENSG00000067057	0.813375	9.50381	9.49082	9.21681	9.28119	9.64585	9.6439	9.49891	9.29366	9.14561	9.25628	9.33484	9.31855	9.66866	9.50719	9.60894	9.71891	8.71903	7.07143	9.89555	9.56862	7.12215	10.301	7.14224	9.17591	9.66286	7.91274	8.61265	9.26937	6.43969	6.44687	9.59562	10.0632	8.45504	8.7349	6.59602	8.28962	8.5902	7.48907	8.77931	7.54038	9.05128	7.84293	7.42703	8.32304	9.08586	6.91888	7.32586	10.5342
ENSG00000067064	0.929082	9.952	10.0207	9.77258	10.4318	9.84989	10.7645	9.8329	10.6798	11.1215	11.3214	10.5314	10.2212	10.1089	10.0886	9.60603	10.0568	11.277	9.25547	9.48246	8.71575	7.66098	9.28367	8.19419	9.02312	8.83268	8.50593	9.78304	8.65273	11.0751	7.55638	8.0347	9.81614	9.37928	7.92172	9.21873	9.16615	8.80493	8.32309	9.35801	8.83311	8.82705	9.63263	7.59965	9.39878	9.61607	9.18374	8.62583	8.60534
ENSG00000067066	0.237297	4.79377	4.83331	4.66516	4.83522	4.64094	4.78056	4.74385	4.81104	5.89174	5.86631	4.72758	4.80927	4.83062	4.71082	4.67994	4.86235	4.94649	5.36787	5.09413	5.71769	5.35997	5.07586	5.71914	5.10734	5.06772	5.69829	5.23915	5.07608	5.30958	5.23333	5.55819	5.08863	5.71809	5.34993	5.40256	5.80075	5.34326	5.65931	5.41941	5.94686	5.62332	5.26305	5.4385	5.51319	5.37159	6.07385	5.68921	5.05317
ENSG00000067082	0.851936	6.57751	6.42607	6.21414	6.29529	5.98195	6.3853	6.03361	6.26169	6.71504	6.99355	6.50735	6.26866	7.35925	7.1449	5.94038	6.67769	6.53109	7.3531	6.89979	7.9979	8.6299	7.11123	8.34622	6.67845	7.42628	8.53412	6.73619	8.0351	6.93712	7.57118	7.53729	6.53494	7.9004	7.80366	8.77596	8.58867	7.74178	7.92366	6.57237	8.22849	8.31949	8.32791	7.15523	8.99364	6.94682	7.95862	8.12504	6.82786
ENSG00000067113	0.649951	9.65029	9.47467	9.7145	9.67168	9.50579	9.722	9.79693	9.64194	8.9347	8.69867	9.0162	9.28568	9.51548	9.2939	9.27455	8.85449	7.76642	9.73704	8.75622	10.3525	7.17719	8.75678	9.1233	8.59548	8.21925	9.90853	9.55567	7.99407	7.7963	8.55447	8.99956	8.79567	8.98313	9.52935	8.81066	9.25897	8.75745	8.42293	8.39392	9.06865	11.6445	9.6844	7.55461	9.39269	9.81854	8.51625	8.80764	8.6318
ENSG00000067182	0.245536	8.38357	8.54716	8.42579	8.61944	8.42402	8.52694	8.47338	8.45461	9.74443	9.46322	8.48538	8.20224	7.78888	7.87337	9.11852	7.95193	7.96567	9.17666	7.46599	9.11518	8.78236	7.06534	8.48304	6.87333	7.30251	8.82814	7.54459	6.77495	7.53582	9.06477	8.22537	7.28181	9.82442	9.1248	9.8724	9.34491	9.63568	8.16098	7.99425	8.49969	9.30904	8.93608	8.16692	8.77792	8.51139	9.36632	8.06116	7.50626
ENSG00000067191	0.458106	5.48664	5.83165	5.82809	5.80968	5.5523	5.79162	5.5619	5.92859	5.7928	5.92633	5.4949	5.66387	5.77267	5.69272	5.8243	5.80038	6.0921	6.51133	6.84306	6.30413	6.57092	7.03877	6.35254	6.76399	6.76335	6.38158	6.26773	6.99314	6.40401	6.55674	6.8665	6.87407	6.68949	6.36086	6.4848	6.17225	6.52124	6.71339	6.51126	6.12163	7.24273	8.7127	6.70264	6.23702	6.36358	6.35717	6.2699	6.35512
ENSG00000067208	0.181146	4.74409	4.80078	4.78674	4.78679	4.70011	4.79249	4.6612	4.88356	5.07263	4.96368	4.83133	4.72931	4.92461	4.81265	4.71933	4.84881	4.87569	5.09685	4.92409	5.15408	5.06587	5.25985	5.0475	5.24827	5.01962	4.9869	5.12817	5.0734	5.20394	4.95582	5.05548	5.0284	5.12523	5.04775	5.39113	5.10938	5.0823	5.03054	4.96265	5.33609	5.01848	4.98161	5.25263	5.0238	5.18767	4.94104	5.16772	4.96503
ENSG00000067221	0.516091	6.61163	6.66711	6.85201	6.68324	6.42144	6.53976	6.71489	6.87107	8.17909	7.95874	6.77764	6.57194	6.96398	6.62388	6.43667	6.74772	7.24367	8.11956	8.74338	7.66855	7.7114	8.71939	7.5442	8.22907	8.07623	7.41433	7.94848	8.67401	7.53683	8.09021	7.87363	8.53354	7.37613	7.72986	7.34007	7.49937	7.4429	7.58232	8.04885	7.79831	7.76647	7.48278	7.90447	7.45796	8.16045	7.75075	7.55446	7.6522
ENSG00000067225	0.734162	9.02747	9.58508	9.73383	9.02341	9.7253	9.01763	9.99674	9.48926	10.2154	10.7645	9.15547	9.73982	9.80347	10.6366	9.70004	10.6312	9.67141	10.6608	10.2881	9.87248	10.4372	11.146	9.39361	10.1152	11.2079	9.11343	9.24123	10.2609	7.76134	10.2955	10.49	9.93719	8.75937	10.5838	7.0464	10.4912	9.16802	8.31195	9.3005	8.73852	10.563	10.3741	9.39624	9.82314	10.5313	9.52205	9.05735	10.2674
ENSG00000067248	0.819939	7.35761	6.66904	7.11067	6.60235	7.32292	6.88731	7.13422	6.91993	7.73499	7.52795	7.02103	7.03496	6.60307	6.9354	6.98232	7.09339	6.4656	5.44949	6.19503	6.65648	5.54241	5.78822	6.71196	5.86598	5.76761	6.08053	6.73145	5.3997	6.56637	5.73847	5.8173	6.41351	5.93302	6.63263	5.95273	6.33242	6.64917	6.23808	6.73443	6.66349	6.9763	6.90662	5.07756	6.65818	6.11666	6.25297	6.70246	6.59426
ENSG00000067334	0.856242	10.6544	9.67392	10.3041	9.94849	10.639	10.0862	10.119	9.75352	9.01029	8.8473	9.92765	9.87833	9.80671	10.0661	10.0012	10.0154	9.11155	7.15077	8.23653	8.64328	7.59991	7.48513	8.54657	7.9831	7.50099	8.1604	8.32312	7.00315	8.54315	7.69105	8.81488	8.40052	8.13994	8.01189	8.35724	9.09498	8.86543	8.50457	8.5367	9.00001	9.06167	9.33847	7.68328	8.64455	8.37369	8.40195	8.59496	9.01902
ENSG00000067365	0.652009	7.5413	7.63404	8.40563	8.07958	8.36531	7.81124	7.97138	8.08258	9.07797	8.92434	8.60062	8.30408	8.81349	9.17153	8.7296	8.87374	7.23021	7.25646	6.91326	7.22547	7.66359	6.76076	6.73225	6.69396	7.60449	6.83934	6.85698	7.20577	7.45652	7.30589	7.9108	6.96771	6.37193	6.90969	6.94285	7.00624	7.18071	7.42598	7.05654	6.94922	7.74007	9.1048	7.16076	6.93923	6.84321	7.04197	6.68774	8.42346
ENSG00000067369	0.598057	10.0251	9.89059	9.52787	9.76215	9.65418	9.89924	9.72488	9.29364	9.71119	9.71791	9.91039	9.64105	9.27719	9.7002	9.56798	9.2227	10.3555	8.30897	9.05799	8.60682	8.53167	8.90752	8.58736	8.83222	8.76012	8.43681	8.63902	8.96837	8.55429	8.73613	7.99785	9.04174	8.36352	8.41657	8.41115	8.43994	8.48141	8.68176	9.93661	8.45835	8.79686	8.23732	7.90261	8.53897	8.55038	8.51848	8.32641	9.22207
ENSG00000067445	0.361811	6.44172	6.55259	6.32285	6.64615	6.86286	6.72904	6.60382	6.48259	6.33444	6.17414	6.72627	6.52129	6.98567	7.12276	6.48414	7.25652	6.909	5.0656	5.99674	5.0476	5.28629	6.14215	5.47517	5.52977	6.04485	5.05212	5.83168	6.62228	5.51144	6.34827	5.0883	6.24584	4.96487	5.07471	4.80705	5.03656	5.56571	5.28501	6.40071	5.25447	5.01875	5.15275	5.31864	5.12038	5.89974	5.06748	5.0351	4.95874
ENSG00000067533	0.747255	7.10265	6.51139	6.74035	6.62752	7.35303	6.65814	6.77529	6.71289	6.22474	5.90868	6.90323	6.87538	6.5146	6.51052	6.57856	6.32314	5.88461	4.82203	4.91778	5.28521	4.67442	4.96518	5.20292	4.91645	5.17302	4.99236	5.28657	4.82302	5.33496	5.03938	5.20956	5.14789	4.99588	4.95727	5.06106	5.34202	5.33336	5.34218	5.2164	5.62282	5.99841	6.3733	4.64686	5.27382	5.05447	5.00423	5.02849	5.09969
ENSG00000067560	0.741265	11.894	11.5359	11.7756	11.7165	11.7728	11.7967	11.7546	11.2764	12.2344	12.2822	11.5661	11.8812	11.6911	11.5877	11.4529	11.9776	11.5964	11.7048	10.7023	11.6957	11.9973	11.1274	11.3735	10.2044	11.0757	11.462	11.4405	11.3578	11.0849	11.919	10.9534	10.5949	11.0671	11.5984	10.4754	12.1145	11.7101	10.832	10.5629	11.7206	11.5517	11.2228	10.7833	11.5183	11.6733	12.172	11.4232	11.1354
ENSG00000067596	0.614099	6.97491	7.26887	7.60976	7.61966	7.49506	7.51434	7.52013	7.63582	7.07881	7.17614	7.5932	7.41809	7.17456	7.37886	7.51544	6.9187	6.75645	6.59917	6.51571	6.90532	7.38216	6.64613	6.64407	6.34026	6.80795	6.88304	6.34761	6.79494	6.90476	6.52311	6.9312	6.63511	6.91337	6.73033	6.88052	6.94067	6.87421	6.88473	6.72257	6.86246	6.83858	6.71908	6.92405	7.12205	6.42343	6.94147	6.75374	7.42682
ENSG00000067606	0.816089	8.50711	8.82829	8.91083	8.74958	8.77277	8.65565	8.75352	8.39913	6.54225	6.79866	8.99595	8.45231	8.59216	8.97633	9.01218	8.74128	8.3278	7.63473	10.1724	6.96992	7.7262	10.786	7.51308	10.1282	11.4488	7.88894	9.43121	9.74287	7.56587	8.93981	7.08791	10.3295	8.87794	7.70705	7.12448	9.01093	6.70962	7.42833	8.69259	9.99449	6.96755	7.10569	7.8308	7.65265	9.43781	7.58672	7.73227	9.30584
ENSG00000067646	0.869545	4.30902	4.24607	4.31694	4.28809	4.20824	4.27748	4.28505	4.36933	4.46267	4.38639	4.28292	4.16008	4.37136	4.34538	4.37962	4.40062	4.34412	4.57992	4.42001	4.65488	4.49218	4.6396	4.46926	4.46415	4.32212	4.51487	4.43085	4.50847	4.46285	4.42238	4.57275	4.4032	4.44066	4.65383	4.52753	4.40687	4.40314	4.38725	4.47659	4.49596	4.54573	4.57477	4.46094	4.5908	4.44169	4.63958	4.4341	5.25906
ENSG00000067704	0.657119	9.87312	9.68316	9.59326	9.69301	9.88611	9.73506	9.9133	9.46596	10.3908	9.86872	9.91264	9.79496	9.87254	9.98125	9.62203	9.96128	9.29818	8.40699	8.52544	8.91512	6.9115	7.84296	8.76899	8.30843	7.45744	8.93591	8.52212	8.04747	8.76602	7.35973	8.73127	8.69729	8.4547	8.81989	9.00286	8.74167	8.93955	7.94541	8.49337	8.96975	9.09759	9.57491	7.68343	9.35693	8.64302	8.23037	8.79651	8.95391
ENSG00000067715	0.569251	6.60585	5.95506	6.07939	5.95093	6.38401	6.33369	6.50812	6.19027	4.7954	4.999	6.36098	6.20505	6.11785	6.25858	5.58318	6.70815	6.78397	5.69724	10.6906	5.91906	5.43584	9.89817	5.41174	8.60635	7.78961	5.37031	7.70324	8.18511	5.47143	5.57276	5.16922	11.1412	5.81192	5.60326	5.45248	5.25336	5.35475	5.30884	6.75304	5.65575	5.43111	5.4629	5.5879	5.29246	6.62147	5.63883	5.29071	5.43507
ENSG00000067798	0.0759614	5.07936	4.90356	4.87657	4.84004	5.04775	4.77189	4.92903	4.88377	5.84094	5.86433	5.02462	4.94555	4.77916	4.74826	4.66699	4.78857	5.27941	5.03531	5.8685	5.18397	4.9531	5.69924	5.24985	5.5824	5.49641	5.13076	5.7046	6.18003	5.12008	4.92216	5.32283	5.91964	5.11383	4.96621	5.07167	5.09248	5.40875	5.13285	5.40599	4.98006	5.21801	4.96537	4.88052	5.12093	5.52893	5.46075	5.03765	5.189
ENSG00000067829	0.77963	8.25733	8.49126	8.72781	8.43596	8.57876	8.51038	8.67553	8.34957	8.94751	9.12488	8.36489	8.38038	9.02514	9.13175	8.93674	8.49916	8.4113	8.6844	8.47269	8.33527	8.40888	8.95636	8.13806	8.58757	9.12089	8.24975	7.85308	9.25011	8.03125	8.84104	8.45252	8.42569	8.5297	8.62574	7.82256	8.19553	8.48991	8.03606	8.20627	7.71183	8.18979	8.49133	8.72048	7.91129	8.21958	8.24636	8.15978	7.82857
ENSG00000067836	0.911452	7.65681	7.82694	8.09391	7.84203	8.0793	7.85184	8.3803	7.82336	7.84538	7.79904	8.13265	7.77788	7.64045	7.23842	7.88106	7.37917	7.90421	8.96948	9.62557	7.72067	9.08783	10.4321	8.10699	9.65849	10.2489	8.01139	9.8201	9.44692	8.51685	8.65169	9.05373	9.32803	8.26157	8.0898	7.57174	8.10801	7.86224	7.68737	8.97149	7.73184	7.6788	8.09318	8.58904	7.30232	10.4612	7.83499	8.01293	7.87026
ENSG00000067955	0.893433	7.76009	7.74835	7.39519	7.77764	7.49804	7.65189	7.34151	7.52138	7.93855	7.92379	7.83808	7.78929	7.75141	7.62342	7.07638	7.72917	8.03834	7.80491	7.33588	7.87929	8.13916	7.2495	8.17456	7.42124	7.20677	7.74642	8.01181	7.76566	7.31506	7.52028	7.82991	7.25047	7.55357	7.60837	7.70198	8.02754	8.3808	7.86327	7.85419	7.87533	8.20386	8.85396	7.67704	8.1754	7.73539	8.01762	7.6504	7.2653
ENSG00000067992	0.820309	5.92973	5.85105	5.86155	6.22737	5.83818	6.2928	6.07948	6.15265	5.23173	5.28343	6.27582	6.16828	7.14372	7.28262	5.9514	7.79372	5.75993	6.11195	5.94175	5.94506	6.13794	5.89408	6.13753	5.85232	5.82663	5.9507	5.90965	5.89712	5.7943	5.88401	6.23041	5.89926	6.08971	6.14942	5.99934	5.80578	6.00276	5.8904	6.05986	5.97866	5.85443	5.91792	6.31428	6.27857	5.70416	6.16871	5.90331	6.41219
ENSG00000068001	0.237706	7.43942	7.85778	8.0521	8.01358	8.0367	7.88663	8.14922	8.22248	7.8141	7.82691	8.12862	7.88193	7.67039	8.03498	8.53201	7.77481	7.79336	8.00574	6.49269	7.93261	7.14612	6.50189	7.26019	6.43227	6.88407	7.05595	6.65269	7.306	7.50504	8.62224	7.14692	6.57989	6.5741	7.54647	7.75608	8.05234	8.18432	7.90358	6.96718	8.34436	7.69305	6.55333	6.92272	7.28009	7.21504	9.17718	7.36898	7.05868
ENSG00000068024	0.911851	6.01679	5.72959	5.84965	5.95243	6.37652	6.20195	6.14811	5.5964	5.4897	5.1861	6.18967	6.02044	6.05812	6.40353	5.82583	5.36195	6.43579	5.82997	6.86131	6.85548	5.92086	6.35665	6.19699	5.64247	6.84171	6.35101	6.62386	7.25734	5.05724	6.07194	5.56003	6.62037	5.47221	5.20695	4.95455	5.99485	7.00901	5.53145	6.84661	5.06079	6.53224	8.91774	5.36775	5.68659	6.18092	6.15889	5.28985	5.38212
ENSG00000068028	0.453122	6.83146	7.15759	7.32671	7.00093	7.28624	7.2481	7.14592	7.01432	7.85597	7.78536	7.3681	6.90264	7.18685	7.32186	7.23701	7.03977	7.22892	7.18638	6.96425	7.29271	7.88534	7.10554	7.58936	6.89543	7.66069	6.94768	7.23382	7.451	7.2685	7.78196	7.15491	6.73769	7.32486	6.74729	7.21063	7.75684	7.72117	7.15627	6.98523	7.48382	7.51616	6.99043	7.37624	7.57885	7.26128	7.34411	7.16771	7.44983
ENSG00000068078	0.909703	7.07875	7.62087	7.69698	7.92919	7.34322	7.53172	7.48361	7.4454	5.33461	5.38408	7.55335	7.32987	7.7785	7.73382	7.87492	7.09353	7.15126	5.77662	8.64983	6.93754	5.65314	7.89452	5.7603	8.21967	7.56445	6.72947	7.89189	6.92635	7.1102	8.58362	5.90753	8.19189	6.96677	6.26991	7.01191	6.32877	5.57865	6.83644	6.65393	6.17288	6.01037	5.61729	5.99651	8.37876	8.21176	5.7931	6.41738	7.0156
ENSG00000068097	0.676672	7.81948	7.52136	7.67937	7.26544	7.57498	7.27312	7.59525	7.50025	7.67239	7.34934	7.6303	7.40049	7.66593	7.85628	7.9536	7.3399	7.58758	7.03441	6.71605	6.75971	6.79344	6.68008	6.8121	6.92237	6.86381	6.8541	6.89357	6.87153	6.6592	6.69881	7.02385	6.84825	6.82149	6.77948	6.65201	6.64618	6.61654	6.70239	6.99218	6.54935	6.64156	6.94182	7.04509	6.61157	6.77083	6.77055	6.74807	6.65228
ENSG00000068120	0.662309	8.54275	8.89473	8.65317	8.72267	8.6931	8.51925	8.75176	8.65196	8.6978	8.38477	9.07161	8.66716	8.89935	8.93301	9.22785	8.89423	8.27379	9.26246	7.81403	7.72244	8.3283	8.47653	8.38877	8.23635	8.58995	8.2569	7.69152	8.04756	9.019	8.5323	7.90674	8.19583	8.05839	8.95342	8.3304	7.97715	8.03203	8.41319	8.41205	8.68117	8.10838	7.94701	9.15018	8.43504	7.93178	8.11451	8.69061	8.38227
ENSG00000068137	0.522097	4.84709	4.82267	4.8489	4.76103	4.70752	5.03141	4.63656	4.8213	4.61422	4.91961	4.68787	4.78715	5.10571	4.70559	4.82915	4.88591	4.94817	5.32361	4.83343	4.84409	5.18485	4.86081	4.87852	4.6409	5.05497	4.86097	4.71231	4.70092	5.00276	5.57192	5.09492	4.65123	5.01273	4.58191	4.91317	4.71239	5.58814	5.77152	5.00379	4.76804	4.99892	5.31751	5.09803	4.9454	4.83815	5.0136	4.95763	4.83084
ENSG00000068305	0.857398	6.11223	5.90018	5.77039	5.74541	5.9801	5.8962	5.89092	5.81456	6.06591	5.96553	6.02249	5.84076	5.85558	5.84743	5.62583	5.77282	6.10865	5.79287	6.85009	6.82284	5.78185	6.50786	6.38569	6.43191	6.12016	6.32645	6.7434	5.94221	5.93261	6.08542	7.11191	6.87077	6.10376	6.20541	6.27315	6.74223	6.5294	6.0539	6.29293	6.28817	6.77072	7.01207	5.78665	6.84717	6.59662	6.60465	6.37879	6.38972
ENSG00000068323	0.813906	7.5856	8.03026	7.9461	7.829	8.13083	7.94673	8.34139	8.13765	8.41395	8.15504	8.128	7.81545	8.4776	8.68354	8.51281	9.11998	7.51582	8.61958	8.30238	8.73334	7.9921	8.26227	7.98858	8.2411	8.88522	7.81668	8.14336	7.94456	7.52909	8.41564	7.58188	8.31102	7.82387	7.99053	7.40231	8.28441	8.41288	7.60389	8.46445	7.92974	8.49812	7.84373	7.88332	8.40155	8.64021	8.38042	7.66925	7.30168
ENSG00000068383	0.90058	9.49342	9.4441	9.44079	9.57765	9.50104	9.42616	9.34773	9.3417	9.16381	9.41469	9.60126	9.2893	9.043	9.30873	9.4702	9.17525	9.55205	8.25558	8.81326	10.0613	7.91623	9.56722	8.4479	10.7618	11.4717	9.48592	8.60546	8.93885	8.55285	9.0617	9.93109	9.15283	9.0086	8.63235	7.96294	9.04043	9.77572	8.32799	8.74031	8.96579	9.40352	9.93207	7.74708	8.42354	8.5791	8.25888	8.44216	9.24758
ENSG00000068394	0.720229	8.29104	8.79849	8.58932	8.83194	8.49626	8.71533	8.72913	8.63796	9.09518	8.77568	8.69663	8.46122	9.49582	9.53233	8.62379	9.98044	8.73005	7.48811	7.6697	7.62471	8.10978	7.97801	7.66144	7.49049	8.21497	7.61695	7.95278	8.03237	7.93086	7.78486	6.94708	7.63195	7.49074	7.55742	7.33085	7.7136	7.53231	7.52936	7.60013	7.50093	7.69671	7.34587	7.33173	7.79136	7.96279	7.62395	7.07161	7.11872
ENSG00000068438	0.876751	7.2627	7.42806	7.40652	7.404	7.46345	7.33687	7.5385	7.40657	7.9476	8.11126	7.41776	7.31831	8.16066	8.31654	7.28659	8.7289	6.80772	7.6989	6.96558	7.17479	7.29564	7.08964	7.25698	7.03019	7.3074	6.85637	6.926	7.63989	7.15435	7.23081	6.9522	7.04053	6.79427	7.18216	6.89481	7.21003	7.40597	7.09734	7.25215	6.80466	7.19592	7.21501	7.50219	7.13978	6.97061	7.31513	7.19755	6.99325
ENSG00000068489	0.650114	8.34399	8.51816	8.34931	8.26989	8.25061	8.37665	8.36965	8.38655	7.84955	7.86474	8.27243	8.62889	8.49772	8.46918	8.99538	8.56672	7.6666	8.16569	7.93227	8.09706	8.36687	7.70528	8.42758	8.21475	8.90149	8.51099	8.37604	8.00311	8.42689	7.76411	8.05458	8.30011	8.24551	7.28523	7.59006	8.21434	8.48556	7.60471	8.33946	7.64291	7.50108	7.09376	7.28007	8.6947	7.72746	7.63431	8.20901	7.28258
ENSG00000068650	0.812095	4.95632	4.95325	5.04137	5.02334	4.92018	4.95498	4.92049	5.10256	4.73771	4.8377	4.89794	4.95013	4.97849	4.94351	4.91724	4.82516	4.89907	5.41496	5.33196	5.15822	5.43233	5.21947	5.16502	5.30304	5.11161	4.95723	5.83077	5.18011	5.21529	6.49202	5.50152	5.31018	5.29529	5.3316	5.30727	5.52879	5.23953	5.62898	5.3753	5.18706	5.06797	5.18759	5.53347	5.02608	5.34581	5.22719	5.07671	5.23022
ENSG00000068697	0.709406	11.3119	10.54	10.5824	10.768	11.0256	10.9947	10.7785	10.3632	11.5081	11.0128	10.8804	10.9136	10.9963	10.7176	10.8867	10.9771	10.3686	10.8907	9.28286	11.168	9.40635	9.42196	11.2958	9.17443	9.44808	10.732	9.58964	9.5007	9.95971	10.3365	9.98187	8.93462	10.2407	11.4622	10.0513	11.1964	11.45	10.5077	11.1244	11.6384	10.96	10.1005	10.4563	11.0793	9.95279	10.6234	10.5957	11.7682
ENSG00000068745	0.44581	9.50405	9.46022	9.4414	9.80449	9.42639	9.83778	9.6495	9.35878	8.85532	8.94644	9.67561	9.45689	9.76395	9.78109	9.19662	9.34905	9.87785	7.19906	7.72207	7.74328	7.43899	8.26915	8.00497	7.66863	9.02098	7.42735	7.50815	8.53947	7.42058	8.37153	6.79862	7.83022	7.30722	6.94529	7.15177	7.99743	7.65722	6.88129	8.64347	7.45025	7.74447	6.63337	7.35945	8.19352	7.59949	8.02828	7.84878	8.05546
ENSG00000068784	0.732525	7.42993	7.14373	7.70597	7.56096	8.1835	7.25221	7.6439	7.03448	7.25473	7.12734	7.66876	7.44554	7.32925	7.32455	6.80484	7.20699	7.63612	6.70134	6.60882	7.13922	6.85607	6.34124	6.92279	6.46632	6.52972	6.96552	7.11195	6.37622	7.33693	6.83506	6.69654	6.8374	6.64968	6.85545	7.0976	7.2667	6.47089	6.73679	7.43018	7.02471	7.27783	6.61455	6.66515	6.83493	6.90061	7.35678	7.28935	7.41555
ENSG00000068793	0.773905	9.07891	9.13773	8.76798	8.93258	9.26424	9.13016	9.13177	8.89933	9.29193	9.19741	8.94534	9.07434	8.80421	8.91471	8.69366	8.87733	8.78022	8.41991	8.52378	8.60713	7.71839	8.39395	8.7264	8.38044	8.0251	8.71295	8.68923	8.43075	8.31554	8.35113	7.86539	8.26941	8.4553	8.53562	8.27713	8.71289	9.01253	8.32834	8.09717	8.87517	8.41642	7.92204	8.22355	8.53522	8.65458	8.87103	8.22959	7.92736
ENSG00000068831	0.765593	6.45762	6.713	6.4726	6.57857	6.23307	6.37809	6.56824	6.68798	6.17098	6.25013	6.44345	6.49328	6.63298	6.79482	6.86215	6.72367	6.63205	6.68146	6.65073	6.74011	7.46621	6.56471	6.13894	6.96659	6.635	6.56892	6.47892	7.09532	6.44917	6.48522	6.80302	6.64163	6.55618	6.49153	6.61105	6.55938	6.30575	6.94253	6.22223	6.62276	6.43041	6.56965	6.67999	6.21235	6.45092	7.16653	6.29186	6.39571
ENSG00000068903	0.73031	8.6614	9.0294	8.76776	8.90001	8.56598	8.7479	8.6751	9.06291	8.97261	9.28528	8.5888	8.88715	8.90625	8.80564	9.15813	8.88737	9.46139	9.90788	9.69055	9.11255	9.40096	9.86343	9.16428	9.94702	9.84673	9.0569	10.6729	9.77113	8.76837	9.33492	9.52364	9.56887	9.34301	9.05857	9.35026	8.98121	9.41335	9.34476	9.07088	8.66365	8.91129	10.3238	9.49931	9.2364	10.7593	9.11227	9.22829	8.8922
ENSG00000068971	0.430522	6.94129	6.79334	6.87779	7.01962	6.785	6.76295	6.82111	7.10827	7.54564	7.34138	7.01607	6.74412	6.86289	6.91237	7.39958	6.88347	7.17808	7.53996	8.17329	6.95337	7.52251	8.32234	6.86737	8.00731	8.90231	7.09329	7.51385	8.27374	6.91734	7.01365	7.4022	7.66367	7.08816	6.95282	7.0535	7.0954	6.99496	7.13172	7.31447	6.72762	6.99079	7.23441	7.38063	6.9495	7.79802	7.24097	7.1278	6.73455
ENSG00000068985	0.456176	4.66749	4.7531	4.87153	4.8278	4.75624	4.91784	4.74579	4.72505	4.84375	5.02608	4.75265	4.63029	4.9971	4.78418	4.89616	4.73885	4.60914	4.89964	4.89038	4.85752	5.33857	5.01027	4.89881	4.869	4.82972	4.98016	4.88705	4.74918	4.93698	4.97748	4.80927	4.7438	5.19996	4.85057	5.42456	5.03046	5.16623	5.2737	4.91439	4.90036	4.79158	5.051	5.05704	4.87646	4.81381	4.93699	4.99511	5.45414
ENSG00000069188	0.227575	6.93695	7.17613	7.0179	7.32556	6.9986	7.22828	6.85089	7.16663	7.02066	7.04136	7.21763	7.20028	7.22616	7.28069	7.58747	7.04345	6.94129	6.57542	6.41033	5.82886	7.17718	6.25765	6.4391	6.55304	6.51955	6.14258	6.63489	6.62357	6.40656	6.27456	6.52972	6.36945	6.66481	6.2939	6.36329	6.13766	6.72664	6.70619	6.17732	6.21291	6.18321	6.24789	6.85582	6.34433	5.91076	6.49789	6.40494	6.46936
ENSG00000069206	0.22913	4.59228	4.71839	4.5709	4.71044	4.64157	4.68505	4.69738	4.63655	4.68721	4.76372	4.63845	4.62372	4.6037	4.6032	4.69618	4.66576	4.70716	5.10451	4.81445	5.00012	5.07291	4.67641	4.67532	4.92747	4.75874	4.7838	4.75226	4.8778	5.01322	4.77711	4.98069	4.74221	4.86328	4.90433	4.88415	4.68469	4.95596	5.09007	4.80847	4.8563	4.68702	5.09881	4.86087	4.65779	4.65614	4.82825	4.75312	6.48487
ENSG00000069248	0.630697	9.88468	9.36992	9.67712	9.51111	9.93801	10.0007	9.75457	9.27461	9.01451	8.48487	10.3685	9.81972	9.71353	9.556	9.37136	9.66998	8.91514	7.03101	7.9964	7.87328	7.11838	7.51663	7.98726	7.83281	7.63942	7.6395	8.455	7.86963	8.03595	7.34583	7.09703	8.08068	6.93926	7.31508	7.11364	7.89427	8.16739	7.20044	8.37986	8.2399	7.77449	6.9237	6.25764	7.79342	7.96314	7.3146	7.46796	7.66795
ENSG00000069329	0.805281	10.9056	10.6917	10.792	10.5818	10.7008	10.7263	10.7378	10.588	11.1436	11.076	10.6214	10.592	10.6099	10.6306	10.6207	10.6584	11.1165	8.88016	10.5325	9.90507	9.02103	9.91772	9.65003	10.3777	8.93305	9.44391	9.91656	9.01932	9.17517	9.06224	9.33838	10.5449	10.1391	9.51722	8.47111	9.26925	9.46008	8.97075	10.2974	9.59895	9.31554	8.61931	8.32383	9.3536	9.97207	9.60518	9.59643	10.1863
ENSG00000069424	0.410868	6.45909	6.69835	6.49188	6.3884	6.42803	6.37389	6.50117	6.62191	6.60256	6.47435	6.59342	6.31837	6.53896	6.62159	7.03501	6.25848	6.74592	6.96852	8.17101	6.50354	7.7449	8.35666	6.44169	7.27353	7.58048	6.72489	6.90097	7.12007	6.65537	6.54462	6.95458	7.82478	6.52939	6.72298	6.75728	7.15067	6.49536	6.63125	6.49072	6.36756	6.33315	6.69032	6.88309	6.31404	7.20075	7.61364	6.72713	6.49884
ENSG00000069431	0.226145	5.07347	5.12881	5.13937	5.17698	5.02664	5.03718	5.01368	5.19516	5.25284	5.26103	5.02768	5.11083	5.11174	5.1905	5.1651	5.07624	5.3521	5.41622	5.46104	5.53751	5.5266	5.32331	5.31074	5.61879	5.41767	5.64685	5.62834	5.49706	5.41633	5.42117	6.03685	5.42907	5.60178	5.47357	6.22215	5.44239	5.5964	5.58606	5.35449	5.3826	5.48239	5.99988	5.45915	5.42542	5.40918	5.60207	5.27792	5.27554
ENSG00000069493	0.292292	4.00396	4.05307	4.01286	3.93134	3.96142	4.08703	3.8688	4.12482	3.94294	4.13372	4.00252	4.0485	4.27783	4.02106	4.16174	3.963	3.96266	4.12624	4.02024	4.05946	4.10265	3.92827	4.10005	4.27441	4.1621	4.1969	4.043	4.10958	4.00295	4.17283	4.04198	4.11085	4.17179	4.01198	4.41155	4.22306	4.02253	4.29505	3.96502	4.18653	3.99387	3.92038	4.0826	4.15049	4.09978	4.2697	4.09579	4.06172
ENSG00000069667	0.136913	7.58857	6.72723	6.26393	5.82898	7.45445	6.60958	6.52488	6.46331	5.97896	5.48201	6.23142	6.51655	6.12343	7.10893	6.16297	7.00072	5.11077	5.54828	4.96792	4.93064	5.17178	4.96669	4.84127	4.91869	5.13421	4.89667	4.86451	4.83811	5.10099	4.80525	5.26287	4.95521	5.18297	5.33174	5.77188	5.04345	4.78934	5.6491	4.93302	4.78946	5.00187	7.16836	5.07874	8.44952	4.9447	4.9828	4.84373	6.70707
ENSG00000069702	0.525874	6.45528	6.2788	6.03703	5.99501	6.20327	5.9071	6.10632	5.7411	8.36886	7.73924	6.21484	6.20177	5.68077	5.61294	5.64167	5.65287	7.89761	7.92952	6.38006	9.25274	6.10309	5.83451	8.58215	6.10284	5.68411	7.47656	6.44876	5.63822	6.09946	6.63209	6.86332	6.09669	6.35534	7.04197	7.61166	6.95194	10.11	7.55635	7.10862	8.36058	8.85939	8.18213	6.83146	7.71951	6.52654	9.11202	6.47546	6.2277
ENSG00000069712	0.18635	4.40916	4.30654	4.38215	4.56832	4.12575	4.34062	4.28904	4.25976	4.49156	4.45293	4.44314	4.53097	4.60434	4.5829	4.23228	4.58193	5.02722	4.57248	6.17781	4.58397	4.29442	6.78402	4.46443	6.59183	6.00956	4.4092	5.34303	4.84416	4.62139	4.48604	4.56027	7.22017	4.78197	4.60807	4.48467	4.51428	4.29022	4.32525	5.70848	4.44879	4.42201	4.45638	4.66505	4.2697	5.19042	4.387	4.64593	5.12898
ENSG00000069764	0.463611	6.22648	6.13787	6.07636	6.43437	6.14489	6.24736	6.23262	6.39812	6.03107	6.06062	6.18967	6.38998	6.56954	6.17599	6.08059	6.46066	6.22679	6.45583	6.3601	6.87024	6.66664	6.33871	6.60369	6.54014	6.29322	8.50149	6.46516	6.41784	6.62734	6.79133	5.92131	6.26339	7.02647	6.38753	6.5585	7.021	6.54365	6.85247	6.18086	6.75953	6.367	6.52675	6.29235	6.28124	6.36843	6.39574	8.38353	6.87767
ENSG00000069812	0.746891	4.94102	5.08858	4.9638	5.0257	4.87266	5.00097	4.97625	5.03621	4.85987	4.9	4.82408	5.01373	5.07072	4.95123	4.87865	4.84869	5.12737	5.05302	5.05936	5.0285	5.21483	5.12038	5.00935	5.14269	5.0835	5.22369	5.10422	5.03837	5.16839	5.03888	5.19113	5.07186	5.29113	4.97165	5.1159	5.02509	5.23205	5.32797	5.11381	5.0694	5.0748	5.26814	5.28899	5.15127	4.87304	5.18588	5.16514	5.06759
ENSG00000069849	0.990035	11.8611	11.9448	11.9234	11.7764	11.8309	11.7769	11.917	11.5976	11.9017	11.6208	11.937	11.8117	11.7329	11.6684	11.7542	11.896	11.1705	11.2669	10.0845	10.0399	9.60274	9.94227	9.12987	9.62888	10.3816	11.0676	9.81462	9.78956	10.1018	8.54701	9.10146	10.3557	11.4756	10.4274	8.3611	11.9675	10.9899	9.34218	10.9576	10.769	10.7911	9.23793	8.8673	11.9465	10.407	10.2394	9.15938	10.4429
ENSG00000069869	0.829671	5.78149	5.56139	5.56325	5.34614	5.49308	5.43698	5.65967	5.49105	7.29679	7.01803	5.50234	5.34828	5.41497	5.42527	5.21333	5.48665	5.79504	5.30045	4.7746	5.82323	5.19656	4.81912	5.70141	5.1898	4.74333	5.22576	5.13481	4.88342	5.86615	5.40602	5.31077	5.05026	5.65539	5.84413	6.28964	5.6609	5.46095	5.61767	5.2782	6.69554	6.37434	9.72573	5.27324	5.54432	5.15213	5.46312	5.11656	4.93026
ENSG00000069943	0.836182	6.89403	6.26911	6.74159	6.48688	6.38643	6.47289	6.69201	6.33998	7.32683	7.17756	6.28201	6.7885	6.58336	6.74746	6.35558	6.37704	5.84406	6.39824	6.21422	6.04542	5.95562	6.08461	6.08313	6.72891	5.82803	6.5116	5.95717	5.20829	5.7832	5.76768	6.44561	6.24589	6.36444	6.08275	6.08345	6.2426	5.61258	6.12578	7.2871	6.20679	6.04218	5.89101	5.81967	5.83304	6.53429	6.11565	6.53011	6.79293
ENSG00000069956	0.745536	11.2463	11.26	11.0828	11.4675	11.105	11.3463	10.8853	11.277	10.0981	10.3569	11.3257	11.4452	11.1827	11.3977	10.3466	11.1596	11.2575	7.74293	9.72304	8.90826	7.49944	9.57137	8.82382	10.066	9.65534	9.90411	9.59363	8.89499	9.7149	8.14424	8.58397	9.882	9.56867	8.61564	9.5028	9.12083	9.18095	8.68919	9.56289	9.57848	9.87478	10.3063	7.48103	10.1858	9.49759	9.09725	9.12262	10.2939
ENSG00000069966	0.201028	7.24587	6.9428	7.16211	7.12439	7.06007	7.11512	7.15502	7.05644	7.35458	7.32595	7.12222	7.22281	6.86247	7.16153	7.31679	7.13093	6.79741	6.79439	8.0589	7.37292	6.98438	8.00893	7.22928	7.9158	8.07121	6.77454	6.90303	7.94398	6.77108	6.61884	6.68037	8.15309	6.68331	7.67384	6.93333	6.5952	7.98314	7.14338	7.77417	6.69543	6.92981	6.39224	6.77567	6.62303	6.99196	7.16165	6.60079	7.07939
ENSG00000069974	0.231429	7.20427	6.94084	7.08053	6.96832	7.01259	7.04843	6.85261	6.78436	8.32857	8.12721	6.9486	6.95693	7.12437	7.11197	6.96393	7.15258	6.94755	7.313	6.58065	7.40551	9.24151	6.61847	7.30532	6.66677	6.80875	8.17447	6.78806	6.7616	7.13926	7.36339	6.85616	6.66567	8.05304	7.71257	8.79841	8.4714	7.12341	8.55563	8.514	7.33831	8.01061	6.75831	6.7942	7.38423	6.68107	8.38232	9.36477	7.25342
ENSG00000069998	0.244548	8.8761	9.11586	9.10178	8.99864	9.15074	8.7612	9.1215	9.29295	7.49527	7.45288	9.37473	9.39638	9.43543	9.66005	8.87151	9.40551	8.19163	7.55923	6.92116	7.27409	7.22948	7.58095	7.72283	7.19133	8.02843	7.44344	7.08141	8.15454	7.39267	8.21575	7.44057	7.27986	7.782	7.15291	7.68578	7.05159	8.15449	7.04707	7.50748	6.84611	7.95603	7.49839	7.39463	7.85641	7.05611	7.615	7.33462	7.25824
ENSG00000070010	0.807801	9.26095	8.02159	9.20382	8.12923	8.96475	8.58448	9.07841	8.74548	9.18658	8.85042	8.85926	8.5229	8.0912	8.24233	8.76799	8.62559	8.29611	7.74293	7.27101	8.11524	7.71628	7.76261	7.52088	7.00918	7.76212	7.91306	7.77535	7.64961	8.55935	7.41061	7.92012	7.54033	7.54124	7.94076	7.84126	8.44911	8.38879	7.55116	7.95422	8.65827	8.63055	8.54244	7.95992	8.03208	7.73161	7.57065	7.90883	8.58886
ENSG00000070019	0.253129	4.56591	4.64357	4.71673	4.63014	4.54919	4.49781	4.51569	4.5393	4.42591	4.53584	4.60706	4.54218	4.44598	4.31715	4.55707	4.57904	4.61641	4.7335	4.52595	4.62908	4.75501	4.55985	4.5982	4.48215	4.52254	6.35402	4.60672	4.82794	4.59996	4.80657	4.67435	4.62597	6.74766	4.64154	4.73169	4.56447	4.54428	4.47265	4.56164	4.69538	4.44467	4.87226	4.68375	4.59425	4.52049	4.80162	4.5686	4.62364
ENSG00000070061	0.813815	7.07988	6.71374	6.48453	6.68886	6.90912	6.71719	6.67243	6.65404	7.05794	6.76675	6.86872	6.77541	6.64535	6.83009	6.51924	6.59268	6.51742	6.88428	6.25677	5.78556	5.24967	5.97027	5.90656	6.20604	6.10185	5.26904	6.27045	5.75648	6.41494	5.62126	5.52194	6.32262	5.35136	5.59313	5.75261	5.88412	6.60742	5.73124	6.77529	5.61922	5.8886	5.25078	5.07573	5.84528	6.0178	5.45009	5.6461	5.94397
ENSG00000070081	0.703585	6.74354	5.88675	6.46508	6.07788	6.52129	6.37595	6.30802	5.85836	8.50414	8.29983	6.44541	5.8385	5.9114	5.93006	5.46392	6.76967	6.51133	4.86427	5.31515	6.31647	5.68113	5.20229	6.4907	5.82787	5.16678	5.22044	5.44153	4.36108	6.45761	4.9969	5.93988	5.47826	5.73192	5.84386	5.82516	6.3474	5.84268	7.56931	9.25452	7.85979	7.47479	5.58992	6.09882	5.69295	5.42517	5.33754	6.87163	8.38362
ENSG00000070087	1.02318	11.2221	11.177	11.0007	10.9472	11.3131	11.1983	11.2143	11.0981	11.4217	11.3653	10.9704	11.4078	11.3027	11.3494	10.1521	11.2271	11.8448	9.01605	11.8589	9.99341	6.96621	11.8834	9.50421	11.2401	11.0345	8.9236	11.0925	11.5173	8.68739	9.7533	9.15654	12.0301	8.4877	10.0626	7.92401	8.45248	10.3565	8.61322	10.4766	9.15364	10.3211	10.5672	9.58554	8.68218	10.9783	8.15342	8.44144	9.14571
ENSG00000070159	0.42223	6.1389	6.41113	6.26325	6.09756	6.12818	6.3328	6.40119	6.45452	5.91024	6.00547	6.43006	6.15909	6.31379	5.96575	5.60524	6.57358	6.28494	6.54758	7.04406	6.64834	6.93993	7.14435	6.97578	6.60991	6.79876	7.61434	6.60109	6.75796	6.65739	6.86278	7.95047	7.20591	7.8521	8.13095	8.4613	7.27063	6.54048	7.74856	6.80864	7.91236	7.88539	9.09408	7.41647	8.07946	6.60008	6.60701	7.69293	6.88882
ENSG00000070182	0.354757	6.55322	6.57976	6.61185	6.47056	6.37932	6.54578	6.42783	6.64618	6.60726	6.47511	6.51027	6.43456	6.67647	6.44193	6.78332	6.52272	6.46612	6.69749	7.3077	6.72139	7.87801	7.32089	6.86906	7.33102	8.08826	6.92681	6.90674	7.32603	7.80617	7.14518	7.7682	7.22832	6.58521	6.63151	7.11557	6.85582	6.65002	7.0586	7.21352	6.79825	8.02408	8.68756	7.26948	6.83475	7.05257	6.78159	6.74587	6.69175
ENSG00000070214	0.883096	4.52225	4.43456	4.51186	4.53945	4.62517	4.69759	4.63163	4.53588	4.43925	4.62223	4.47568	4.67819	4.54646	4.63814	4.53427	4.40366	4.26533	4.45061	5.06319	4.55429	4.47171	4.90725	4.7357	5.34514	4.68409	4.68174	6.09955	4.51552	4.87878	4.72885	4.44943	5.13466	4.63447	4.5305	4.89919	4.49383	4.49094	4.59764	4.56128	4.63204	4.51045	4.38901	4.65595	4.47678	5.21193	4.42102	4.64927	4.34151
ENSG00000070366	0.878016	5.77551	6.11676	6.04922	6.18435	5.93192	6.2461	6.00735	6.04237	6.17656	6.29059	5.99809	6.17143	6.13442	6.17447	6.01862	5.99812	6.41752	6.90122	6.6573	6.81118	7.25288	6.81824	6.96863	6.75093	7.23776	6.78623	7.08088	6.99926	7.13046	7.41298	6.89508	6.88188	6.83358	6.9971	7.23157	6.70653	7.09225	6.97705	6.89183	6.86953	6.6626	6.69746	6.7015	6.78651	7.05155	6.98694	6.78982	7.25003
ENSG00000070367	0.932453	5.17856	4.36131	4.8746	4.6468	4.89006	4.89647	4.82568	4.70032	4.95158	4.90519	4.59332	4.79073	4.61457	4.89902	4.26644	5.01362	4.65136	4.70007	5.31144	5.68964	4.75917	4.93215	5.51099	4.98184	4.5776	5.57988	5.39969	5.29397	5.00029	5.80806	4.8995	4.91085	4.88683	5.78488	4.97451	4.9835	5.68002	5.58466	5.01147	6.10095	5.39427	5.43823	4.65987	5.48905	4.84048	5.57686	4.76816	7.6783
ENSG00000070371	0.775102	6.82075	6.59956	6.97475	6.81848	6.85268	6.89221	6.85502	7.213	6.8897	6.8892	6.92542	6.78818	6.8952	7.02265	7.44461	7.12258	6.83873	8.07648	7.25201	7.09985	8.12449	7.10869	7.01864	7.7102	7.60522	7.06222	7.15316	7.38795	7.32272	7.31525	7.99243	7.06729	7.21445	7.19065	7.4707	6.87149	7.12478	7.27093	7.72541	6.58843	7.82183	9.32163	7.47891	7.24031	7.64898	7.03956	7.69883	9.1457
ENSG00000070404	0.678935	6.33183	6.43456	6.64693	6.26679	6.42468	6.39288	6.4891	6.16007	7.21168	7.4094	6.77601	6.2424	6.27432	6.34856	6.94758	6.24328	6.67062	7.98861	6.55857	7.05464	6.96878	6.59436	6.50728	6.59063	6.55157	6.79761	6.65456	6.49105	6.66254	6.87071	7.49597	6.67431	6.70513	6.77615	6.81486	7.86628	7.51559	7.16473	6.46328	9.62768	7.12268	6.50224	6.93359	6.75669	6.97873	6.58737	6.63421	7.31975
ENSG00000070413	0.720614	7.50198	7.54129	7.81733	7.55919	7.62502	7.4683	7.71299	7.37207	7.57177	7.4116	7.8666	7.41447	7.14399	7.26242	7.85931	7.30253	7.45423	7.47396	7.71761	7.40227	7.358	7.56861	7.67368	7.44849	7.90945	7.3839	7.63234	8.00212	7.20932	8.22083	7.13494	7.55832	7.28093	7.39727	6.91569	7.47455	7.65079	7.21647	7.43495	7.48609	7.23694	7.21523	7.62036	7.51113	7.56325	7.34095	7.30208	7.39381
ENSG00000070423	0.857337	7.19926	7.33855	7.61892	7.72745	7.43743	7.58585	7.75164	7.59821	6.86306	6.91464	7.36461	7.443	7.47802	7.70154	7.91882	7.60417	6.66097	6.87075	7.40253	6.85769	7.35901	7.08156	7.00107	6.82042	7.21482	7.49651	7.24462	7.14558	7.31246	7.0442	6.9093	7.19224	6.97022	6.81845	7.40417	6.66377	7.11189	6.79286	6.87799	6.8532	6.87665	7.56598	6.92491	7.27595	7.11762	6.9452	6.84987	8.23769
ENSG00000070444	0.82372	7.84476	7.92675	7.96065	7.57986	7.96045	7.78427	7.78167	7.07927	7.93403	7.77698	7.91463	7.96642	7.88211	8.06027	7.39156	7.6105	7.75431	7.7255	8.83542	8.29231	7.47368	8.42965	7.90156	8.41521	8.67667	7.68829	8.08045	8.56927	7.30024	8.15644	6.89741	8.87332	7.96127	7.23872	7.00681	8.04121	8.10495	7.42417	8.83254	7.60415	7.67714	6.82717	7.34078	7.577	8.19155	7.74366	7.4929	8.00273
ENSG00000070476	0.980191	6.60786	6.77101	6.85652	6.61328	6.79976	6.57235	6.85742	6.5378	6.31721	6.39342	7.12421	6.58663	6.46426	6.71409	6.71428	6.51818	6.22322	7.03656	6.21176	6.67483	6.95016	6.23039	6.98432	6.60064	6.58643	6.71113	6.48863	6.23861	6.76399	6.38343	6.68582	6.30207	6.71444	6.26708	7.60634	6.77987	7.21614	6.97606	6.92148	5.86094	6.52867	6.83305	6.75064	6.57682	6.25848	6.69049	6.92556	6.61136
ENSG00000070495	0.897483	6.42829	6.51703	6.39724	6.61979	6.17524	6.65503	6.58598	6.56886	6.58994	6.78875	6.47093	6.3394	6.73264	6.62231	6.65688	6.67612	6.47077	6.67821	6.02563	6.54154	6.76934	6.51545	6.27703	6.28856	7.26323	6.47879	6.47017	6.1454	6.56312	6.16118	6.28338	6.24008	6.33214	6.13726	6.59968	6.73768	6.76013	6.30635	6.69231	6.41859	6.81564	7.19425	6.59917	6.71441	6.49294	6.55247	6.25754	7.09036
ENSG00000070501	0.76771	9.73367	9.28294	9.82409	9.54511	9.77693	9.9271	10.0582	9.41743	8.95318	9.12864	10.0488	9.81661	9.92292	9.6672	9.867	9.71367	9.80453	8.56451	8.74155	8.36993	7.86239	8.98829	8.81931	8.82457	10.6983	7.92264	8.82408	9.09084	8.22723	8.33065	8.92248	8.84808	8.18085	8.32652	8.36888	8.5518	8.64149	8.11766	9.38235	8.88905	8.81962	9.30812	9.04795	8.71566	8.68282	8.46413	8.42186	10.2021
ENSG00000070601	0.71988	5.12393	5.18744	5.44984	5.18922	5.08974	5.27193	5.08115	5.37844	5.05957	5.23647	5.03306	5.13654	5.41177	4.88983	4.98807	5.11443	5.40656	6.02705	5.83867	5.42695	5.72145	5.61455	5.3667	6.63342	5.95165	5.55112	5.43195	6.02074	5.55344	5.77162	5.90362	5.93933	5.98295	5.5807	6.22983	5.51619	5.49715	5.57164	6.52403	5.59269	5.48172	5.94277	6.46982	6.01391	5.83314	6.10202	5.60405	6.75031
ENSG00000070614	0.32148	7.05238	7.23297	7.069	7.28804	6.84616	7.08104	7.19453	7.29697	7.39402	7.08333	6.95441	7.13326	6.95404	7.08585	7.51593	7.04491	7.28619	7.16313	6.97402	6.79351	7.05678	7.1829	7.375	6.99728	7.17886	6.69817	7.02653	7.39064	7.09248	7.53272	6.97865	7.10539	6.7248	6.91934	6.87566	7.07824	7.35554	6.59564	6.29325	6.64688	6.6728	6.971	7.27278	7.02605	7.58835	7.51963	6.98015	6.97589
ENSG00000070718	0.758207	7.98602	7.75439	7.83203	7.71874	7.86745	7.93731	7.89445	7.4053	8.07262	7.64772	7.32476	7.95731	7.58751	7.65098	7.8397	7.84739	8.39265	7.52754	9.25629	7.67554	7.35566	8.91456	7.67536	8.84631	8.6033	7.45472	8.23508	8.27618	7.56344	7.47937	7.74468	9.32086	7.22274	7.24748	6.70424	7.66682	7.57229	7.36965	8.75039	7.27662	7.31561	6.69797	6.79031	7.27639	8.64853	7.84349	7.60335	8.11352
ENSG00000070729	0.137481	5.53364	5.64251	5.58602	5.53915	5.62349	5.52168	5.52504	5.62927	5.52432	5.52977	5.56517	5.60353	5.62617	5.61627	5.65297	5.52074	5.64157	5.85155	5.98096	5.58594	5.67382	5.60634	5.40624	5.76618	5.71079	5.46016	5.57927	5.5791	5.63847	5.53322	5.76593	5.81226	5.69306	5.48694	5.55073	5.41382	5.54888	5.72422	5.47765	5.50728	5.45317	5.57892	5.92332	5.5779	5.59706	5.50959	5.61013	5.45919
ENSG00000070756	0.924629	13.0682	12.937	12.964	12.8836	13.0502	12.989	12.5992	12.9427	12.3911	12.307	12.8852	12.8742	12.8136	12.6862	12.8708	12.8789	12.327	10.1742	10.1996	12.4589	11.5754	9.76797	12.6063	10.3808	10.4181	12.1035	10.9153	11.8974	12.1988	11.6138	9.87355	10.344	12.1973	11.2145	11.2256	11.7825	12.2429	11.7846	10.7522	11.6037	12.0115	10.037	12.0457	12.4956	10.9373	12.1669	11.8326	12.9677
ENSG00000070759	0.650642	7.09001	7.20351	7.28927	7.94472	7.30352	7.45684	7.29277	7.20425	6.66031	6.8296	7.40879	7.49211	7.77944	7.78099	7.34171	7.6135	7.6012	7.44878	7.67412	7.52168	8.21495	7.82223	8.31806	7.65214	7.88383	7.66543	8.42625	7.64083	7.97493	8.05442	7.23898	7.70906	8.09939	7.45651	7.80005	7.6607	7.74973	7.47131	7.37001	7.76402	7.6081	7.37518	7.8357	8.30697	8.22817	7.7719	7.83085	8.14061
ENSG00000070761	0.883868	10.3444	9.90674	9.70239	10.0997	10	10.1696	9.94608	9.75475	9.43562	9.34741	10.1415	10.0349	10.3787	10.3438	9.48177	10.1883	10.3467	8.12162	8.97044	7.6862	7.71916	9.25562	8.23689	9.15824	8.82109	7.791	9.26059	9.60497	8.22677	8.74727	7.90086	9.19128	7.36908	7.49694	8.189	8.68435	8.31576	6.9255	9.3957	9.22578	7.85545	6.68651	7.67202	8.22873	9.04957	7.78942	8.02169	9.6869
ENSG00000070770	0.782607	7.87632	7.99326	8.08409	7.88743	8.05316	8.07857	8.2573	7.94824	7.96001	8.02986	7.92222	7.69477	7.92311	7.90214	8.1108	7.67109	7.69987	6.9584	7.20474	7.98761	6.87186	6.79943	7.22134	7.00046	7.00363	7.0684	6.93207	7.12058	7.07989	7.49345	6.84097	7.25695	6.84113	6.80368	6.46498	6.76929	7.5027	7.00536	7.3512	6.72343	7.48013	8.09193	7.78357	8.20262	6.87559	6.70546	6.7653	10.0765
ENSG00000070785	0.72565	8.65164	8.48155	8.63393	8.51326	8.68015	8.69695	9.07018	8.77046	9.44543	8.95141	8.72733	8.83034	8.89247	9.40827	8.90501	9.35662	8.41282	7.93039	7.84749	7.8082	7.95649	7.867	7.87111	7.79229	7.76984	7.92525	7.70104	8.39637	8.00012	8.0367	8.59052	8.02135	7.71082	7.91903	8.34685	8.08155	8.28866	8.10193	7.85434	7.69619	8.28786	8.87881	8.04513	8.23645	7.70181	7.98537	7.97583	8.71843
ENSG00000070814	0.701221	7.44539	7.50863	7.78744	7.37024	7.50574	7.04365	7.51076	7.53953	6.48367	6.37898	7.43405	7.12033	7.09285	7.46545	7.86298	7.23711	6.37122	6.50392	6.08903	6.5451	6.8355	6.29393	6.19003	6.25633	6.76454	6.05396	6.0859	6.36617	6.50203	6.5451	6.34151	6.12254	6.33588	6.11406	6.21043	5.98692	6.42755	6.14535	6.04717	6.26563	6.56313	6.43358	6.70759	6.45186	5.98197	6.31865	6.26357	6.45458
ENSG00000070831	0.64313	7.3249	7.14501	7.169	6.97504	7.05948	6.84864	7.08829	6.99496	7.52791	7.44372	6.87566	6.86315	7.17683	7.16404	6.89963	7.1203	8.63753	7.06145	7.81129	6.9501	7.55491	8.05093	7.25282	7.19739	7.74186	7.15483	7.46211	8.79651	6.93291	6.6781	6.85585	8.04924	7.01824	6.8898	7.02291	7.1958	7.01968	6.73913	7.23805	7.26741	7.03403	6.96986	6.76599	6.96288	7.37671	6.92219	6.92741	6.62822
ENSG00000070882	0.184005	6.12591	5.8804	5.77719	5.73393	5.89885	5.67891	5.90151	5.70228	7.84359	7.58032	6.10181	5.77818	5.67839	5.92659	5.51423	5.72912	5.73047	5.52309	5.56032	5.48352	5.53289	6.0093	5.66028	5.89489	5.40978	5.76233	5.78971	5.55202	5.6598	5.30394	5.83167	5.9312	5.77059	6.3181	5.35786	6.71098	5.49283	5.55321	5.75812	5.76436	5.36439	6.09133	5.29681	6.27596	5.75333	5.88412	5.88553	5.77349
ENSG00000070961	0.061146	6.92159	6.09752	5.72704	5.94537	6.33117	5.91597	6.00679	5.30639	6.39353	6.00056	6.52396	5.83168	5.49864	5.53181	5.48164	5.39805	5.93376	4.99477	8.08508	5.44802	4.84563	7.44207	6.07482	8.79869	6.24097	5.76101	6.47628	5.62193	6.15714	5.53857	5.07323	8.44278	6.42403	5.47319	5.5609	6.20481	5.46102	5.54753	6.36229	6.48176	5.82687	6.1175	5.05113	5.72174	5.7454	5.75339	5.54251	6.22926
ENSG00000071051	0.877134	9.32539	9.2557	9.00975	9.14445	9.2417	9.29191	9.1372	9.01455	8.27871	8.4281	9.16427	9.23893	9.28036	9.16877	8.86759	9.33716	9.40668	8.27803	8.83061	9.21339	8.73842	8.9055	9.25634	8.32524	9.1771	8.78244	8.41515	9.39639	7.82169	8.99391	8.6098	9.27905	9.51517	8.2575	7.27531	8.36884	8.89058	8.75117	8.52149	9.30287	8.60932	9.63351	9.46545	9.40152	8.20446	9.3834	8.53146	8.94234
ENSG00000071054	1.01211	8.57707	8.23831	8.42212	8.41313	8.83374	8.45335	8.56209	8.14875	9.08788	8.96247	8.50913	8.39307	8.03636	8.39254	8.48477	8.03055	7.61926	5.6843	7.87205	6.39845	6.39369	7.55963	6.81707	7.82196	6.9959	5.97059	9.08313	8.30915	6.77204	6.97756	7.13591	7.98021	5.76226	6.19011	6.10485	7.52436	6.86019	6.47344	6.25572	6.95493	6.86079	6.89242	5.79995	7.03707	8.58475	6.63689	6.22704	7.35782
ENSG00000071082	0.679562	9.18255	9.0818	9.52572	9.60874	9.57254	9.40028	9.25838	9.15265	9.48445	9.23086	9.54058	9.41086	9.31285	9.50717	9.75341	9.34444	9.81913	8.82863	8.75908	9.14209	8.79574	8.80204	9.49354	8.91787	8.70253	9.03119	8.80641	9.13583	9.23661	8.95872	8.67451	8.7646	8.81091	8.75272	8.5777	9.17997	9.4462	8.85267	9.21844	9.17477	9.11756	8.90544	8.81868	9.34552	8.84702	9.19172	9.0913	8.53033
ENSG00000071127	0.817257	7.94667	8.04996	8.12145	8.10351	8.11701	8.14283	8.1529	8.04327	8.15789	8.22484	7.9826	7.9996	7.99136	8.07117	7.90816	8.11677	7.47097	7.53745	7.4708	8.67388	8.30153	7.28687	8.04224	7.16479	7.11677	8.45101	7.45005	7.85121	7.67359	8.10335	8.1364	7.4729	8.09061	8.48861	7.61251	8.02824	8.7884	7.66956	7.4069	8.39612	8.5837	7.62329	7.82231	7.92932	7.67376	8.21398	7.68325	8.22989
ENSG00000071189	0.207403	6.11887	6.01531	5.97681	5.99146	5.99185	5.90135	5.93566	5.90602	5.97259	6.01739	5.78664	5.93198	5.87311	5.99871	5.57423	5.86074	5.77643	6.01052	6.15195	6.16823	5.87068	5.99224	6.12348	6.4007	5.98162	6.32863	6.37525	5.9572	6.08664	5.92891	6.27605	6.08136	6.06297	6.30104	6.16459	6.13995	5.88604	6.03398	6.168	6.25531	6.20506	6.55102	6.12026	6.23572	6.17661	6.20907	6.12057	6.5085
ENSG00000071205	0.986713	6.71088	6.6428	6.47306	6.95957	6.69576	6.60082	6.88199	6.99307	7.35909	7.50606	6.83719	6.6888	6.52208	6.18376	6.65422	6.30609	6.29979	6.49582	6.23721	7.45418	6.97448	6.23386	6.45061	5.75567	5.92823	7.02436	6.35609	6.21721	6.20588	6.44058	6.80296	6.1383	6.01939	6.49464	6.32327	6.92008	7.3866	6.63378	6.53114	7.08828	7.23254	7.08822	6.23509	7.05421	6.74743	7.38011	6.7189	6.15856
ENSG00000071242	0.652717	6.71105	6.8189	6.64882	6.60979	6.75863	6.69451	6.75138	6.44093	7.78528	7.30961	6.79112	6.58221	6.35411	6.25385	6.62714	6.22109	7.1408	7.34447	8.66302	8.24174	6.89309	8.42572	7.22978	8.41547	8.34623	7.44252	8.80334	8.38562	6.47107	7.98357	8.80985	8.20771	6.65145	7.40652	6.44121	8.74308	7.72024	7.38348	8.54546	6.88145	7.77601	7.02724	7.18523	7.34643	9.12628	8.09592	7.78096	6.59535
ENSG00000071243	0.918412	8.52717	8.87371	7.71378	8.43686	8.3007	8.21923	7.80211	8.16623	7.38469	7.14075	8.44012	8.56433	8.02164	8.25927	7.55777	7.67623	7.81869	6.40912	6.60893	7.34601	6.53094	6.8427	7.07337	6.80557	7.82006	7.04268	7.02065	6.55142	7.01356	6.50424	6.8598	6.99985	6.81719	6.81326	6.56347	6.88313	6.87173	6.61265	7.11193	7.0239	7.22687	6.75545	6.18859	6.84542	6.64962	8.12415	6.67289	7.17698
ENSG00000071282	0.690764	7.4904	7.81951	7.95399	7.80991	7.8402	7.71549	7.9863	7.93963	9.31082	9.4831	7.40091	7.38699	7.68614	7.75478	8.05001	8.38352	8.90282	7.44222	7.0064	8.8506	6.84929	6.67066	7.67422	6.55182	7.77733	7.11973	7.14483	6.88421	7.10098	9.06728	9.32851	7.38675	7.28202	7.60231	7.12353	8.91768	8.71826	7.62949	7.2821	8.77988	10.6658	10.1035	8.53995	7.76239	7.99795	8.60503	7.28551	7.38473
ENSG00000071462	0.9071	9.01897	9.03521	9.12923	9.14436	9.0658	9.09874	9.2554	8.91945	9.4033	8.79102	9.22259	9.16039	9.51801	9.31343	9.38051	9.49448	8.00405	8.1596	6.99068	8.37996	7.63876	7.95731	7.73142	7.69234	8.01714	7.88293	7.73701	7.49349	7.80411	7.78404	8.2901	7.34999	7.32487	8.16869	7.91493	8.48391	7.896	7.8848	8.20013	7.44846	9.02385	8.78937	8.3668	7.97307	7.67007	7.93454	8.08534	9.09441
ENSG00000071537	0.720118	5.93482	5.96142	5.83819	5.95759	5.87363	5.83056	5.93913	5.84359	6.68295	6.60088	5.65209	5.88838	5.89731	5.71644	5.51994	5.85969	6.32657	5.98909	6.48567	6.51929	6.09511	6.37865	6.62987	6.59154	6.07516	6.77261	6.46058	6.00336	6.55297	6.02473	6.36205	6.49449	6.90716	6.69573	6.76128	6.49334	6.46856	8.01558	6.39191	6.84469	6.65859	6.45703	6.11441	6.20961	6.3203	6.83963	6.679	6.17472
ENSG00000071539	0.755032	9.55971	9.05212	9.63399	9.41567	9.56475	9.41355	9.42459	9.20061	7.40484	7.21504	9.66591	9.97544	9.87205	9.83293	9.00418	9.3936	8.89903	6.76808	6.6955	6.58483	7.9749	6.88369	6.58762	6.34633	6.68184	6.75892	6.56754	7.3467	8.22351	7.26256	6.84376	6.78087	6.51996	6.77305	6.94627	6.61187	6.49147	6.49116	6.84295	6.83833	6.47376	6.48427	6.64786	6.68277	6.60609	7.08718	6.60514	8.94113
ENSG00000071553	0.831265	8.61305	8.71993	8.85049	8.69544	8.89993	8.58836	8.97684	8.42783	9.74284	9.59485	9.02643	8.65131	9.19654	9.35985	9.03526	8.47269	8.91643	9.73511	9.46184	8.9212	9.61736	9.99228	9.41087	9.08744	10.3911	9.4754	9.24551	10.1654	8.64923	9.91901	8.61202	9.36966	8.7852	9.53802	8.32825	10.1494	9.06735	8.55741	9.5926	9.19665	8.81612	8.39138	9.18032	9.32283	9.39249	9.9094	9.22297	8.83971
ENSG00000071626	1.06024	7.24685	6.89429	8.06064	7.06785	7.66524	7.2074	7.89864	7.26896	6.33668	6.21708	7.31482	7.17831	7.03258	7.25886	7.667	7.0366	6.20411	6.54163	6.03144	6.3535	6.92918	6.18072	6.09226	5.87375	6.44863	6.42213	6.35778	6.29607	6.57433	6.6844	6.31362	6.06582	6.02777	6.28332	5.9196	6.02158	6.1593	6.34321	6.3027	6.15914	6.39367	6.18264	6.16651	6.33415	6.33635	6.34523	6.18601	7.97129
ENSG00000071655	0.833786	8.02507	8.30334	8.5849	8.17512	8.30709	8.09007	8.46318	8.34719	8.25045	8.23546	8.66727	8.19543	8.21421	8.24048	8.70649	7.97248	8.44829	9.03446	8.71443	8.48437	8.68959	9.04669	8.51742	8.62837	9.42334	8.4111	8.51437	8.98364	9.01799	9.33292	8.60435	8.62189	8.68795	8.52506	8.6732	8.5997	9.03598	8.52633	8.63053	8.95653	8.86047	8.98992	8.53569	8.32749	8.68726	8.55761	8.37562	8.68156
ENSG00000071794	0.742023	9.34995	8.90691	8.76504	8.8078	9.03718	9.01384	9.1442	8.71267	8.59052	8.21746	8.65267	8.53561	9.61733	9.68429	8.96529	9.98923	9.05539	6.48307	8.01139	7.6215	5.74274	7.59471	8.04877	8.09556	7.63612	6.83455	8.32482	6.06675	8.75266	7.31113	7.26656	8.28384	6.33743	6.80987	7.01406	7.07344	7.38428	7.14873	9.09226	7.34418	7.5318	6.69247	6.10683	6.65838	8.44205	7.00252	7.31	9.75049
ENSG00000071859	0.673598	8.26924	8.70095	8.52744	8.41066	8.7508	9.12302	8.52118	8.65349	9.65735	9.87831	8.87153	8.36506	9.2968	9.2592	8.89698	8.41671	8.5287	7.61421	8.01452	8.12318	7.80226	8.28232	7.58175	8.00024	9.00858	7.57058	8.28875	7.66428	8.35058	7.71249	7.47387	8.15465	8.09468	7.71266	7.46859	8.6186	8.05996	7.70282	8.65232	7.76998	8.60469	8.07088	7.32497	7.99605	8.55086	7.7232	7.94084	7.194
ENSG00000071889	0.707122	6.87432	7.16684	7.46873	7.25451	7.09104	7.16766	7.29198	7.19602	8.0772	7.89906	7.38178	7.00517	7.78193	7.93269	7.9785	7.1967	7.26876	7.74331	7.38544	7.41549	7.42823	7.66241	7.27169	7.5976	7.94077	7.45217	8.11038	7.2386	7.51631	8.02321	7.36298	7.4955	7.52363	7.29272	7.29513	7.17132	7.82583	7.41792	7.58642	7.39029	7.38537	7.25047	7.91734	7.27321	8.02185	6.95215	7.31055	6.65234
ENSG00000071894	0.849408	7.49625	7.91286	7.89929	7.91074	7.93552	7.68826	7.8204	7.65979	7.38126	7.61874	7.92791	7.51034	7.57439	7.66143	8.40521	7.62756	7.72303	7.48692	7.57051	7.55892	8.2139	7.45952	7.84767	7.64378	7.8661	7.55162	7.42624	7.79605	8.0856	8.50991	7.46721	7.57377	8.51872	7.48873	7.84363	7.41991	7.65134	7.59915	7.93312	7.26954	7.39752	7.59269	7.71372	7.59224	7.55723	7.56055	7.3634	8.41866
ENSG00000071994	0.573422	7.25859	6.92548	7.00784	7.2311	7.33157	7.16558	7.32247	7.14886	6.86861	6.81232	7.22532	7.15034	6.96703	7.374	7.07041	7.051	6.47913	5.91151	5.90153	5.87575	6.04028	6.01662	5.90602	5.94403	5.82373	5.86577	5.81531	5.84408	5.82408	5.72611	5.92062	5.9731	5.83492	5.90582	5.61898	5.75854	5.75964	5.86828	6.02244	6.09191	6.00373	5.80662	6.25878	5.82937	5.89473	5.84119	5.88417	5.84085
ENSG00000072041	0.711548	6.25189	6.01019	5.43777	5.98948	5.82347	6.18018	5.89615	5.67129	5.44562	5.46625	6.46802	6.07006	5.38306	5.0195	5.33181	5.0087	5.98219	5.1909	7.01566	5.44979	5.49005	6.56532	5.25952	6.10997	6.20554	5.28929	6.24358	6.65987	5.46983	5.27	5.53499	7.12718	5.7712	5.32886	5.44681	5.44914	5.3792	5.52146	6.6387	5.2927	5.34603	5.76119	5.3948	5.50604	5.54794	5.45238	5.41857	5.71781
ENSG00000072071	0.930583	7.21883	7.39876	7.26227	7.28327	7.41201	7.23928	7.33078	7.05731	6.50683	6.6493	7.42586	7.36227	7.34448	7.44675	7.65741	7.27076	7.2179	7.09485	8.44498	7.01275	7.20867	8.61146	7.33625	8.33535	9.24662	7.36916	7.54753	9.26918	6.99767	7.97109	7.02556	8.33432	7.11663	6.88431	6.91555	6.97291	7.38703	7.0031	7.85369	6.80658	6.96237	6.93188	7.34608	7.09139	7.69928	7.01039	7.16415	7.05153
ENSG00000072110	0.75554	9.02075	9.36052	9.45369	9.14669	9.4073	9.30443	9.35171	9.12065	9.91109	10.0091	9.06594	8.92185	8.88175	8.91365	9.39626	8.98649	7.72023	8.24583	8.58041	10.7154	10.0179	8.483	9.72979	8.92308	7.47656	9.51424	7.22218	7.58753	8.67204	9.18082	8.68765	8.58417	8.62454	8.2786	8.69593	8.9845	9.78076	8.82366	7.66112	8.98938	10.3587	7.78437	8.93233	9.56564	7.68261	8.947	8.12463	7.67571
ENSG00000072121	0.592781	6.54675	6.4738	6.21689	6.30044	6.29862	6.21285	6.30706	6.12955	6.31921	6.5447	6.32362	6.25321	6.20373	6.16904	6.26814	6.07897	6.17567	6.46055	6.12935	6.26881	5.98105	6.12541	6.48673	6.30872	6.72433	6.25746	6.38209	6.19677	5.98367	5.96329	6.2456	6.39653	6.30323	6.26992	5.94891	6.43544	6.14383	5.81945	6.52176	6.00424	6.2074	6.11229	6.13964	6.2215	6.43884	6.26145	6.0395	5.88063
ENSG00000072133	0.731337	5.47059	5.4115	5.621	5.3844	5.307	5.42595	5.56435	5.52126	5.32758	5.52169	5.36394	5.30348	5.50523	5.33392	5.45111	5.52356	5.59078	6.31972	6.0507	5.88373	6.24653	6.28656	5.97293	6.37044	6.15145	6.20829	5.94437	6.20097	6.02675	6.18352	6.50393	5.9984	5.93083	6.35959	6.03912	5.77984	6.0387	6.34516	6.22932	5.95553	5.86108	6.35648	6.53041	6.09499	5.93386	6.35809	5.98394	6.02693
ENSG00000072134	0.72059	6.60556	6.5729	6.88315	6.43817	6.63437	6.44325	6.5174	6.76401	6.70932	6.65671	6.67918	6.69602	6.65389	6.57823	6.63964	6.59657	6.66369	6.67369	7.61089	7.33161	6.8886	7.79494	7.28401	7.11528	7.47083	6.77072	7.98759	7.78612	7.00979	7.34802	6.94667	7.567	6.83695	6.76315	6.78796	6.92127	7.07137	7.00905	6.7691	7.18206	7.03333	6.7739	6.9672	7.76893	7.60708	6.80717	6.73516	7.24125
ENSG00000072135	0.760757	6.54908	6.73818	6.9749	6.68683	6.60023	6.51392	6.58137	6.62395	7.22078	7.22141	6.57015	6.53208	6.59587	6.2885	6.5511	6.55369	7.19995	7.92561	7.72252	7.98706	8.49901	7.71395	8.28096	8.10668	8.09814	8.18764	7.45166	7.70952	7.89805	7.90461	7.89523	7.7223	8.27422	8.10929	7.79784	7.79016	7.46074	8.01096	7.69829	7.38033	7.84071	7.81127	8.18211	7.45486	7.77463	8.44148	8.25748	7.33063
ENSG00000072163	0.7203	6.62391	7.17989	7.08466	6.97519	6.37421	7.24641	6.62732	7.2856	6.97396	7.18247	6.37057	6.56289	6.77007	6.8155	6.95902	6.9807	6.3972	7.43977	7.68645	9.73699	7.52567	7.15432	7.47689	7.67032	7.30519	8.86645	7.38141	7.49967	7.34911	7.71639	8.67798	7.43084	7.5946	7.2773	7.62459	8.14287	7.60588	7.42949	7.27364	7.33923	8.38484	7.32748	7.68932	7.44496	7.73051	8.10866	7.42196	7.09848
ENSG00000072182	0.288299	6.83816	7.29445	6.82043	7.01912	6.99567	7.13716	7.07489	7.06065	7.08813	7.17768	6.95588	6.94887	7.12415	6.50011	6.86683	6.7434	7.49574	7.78784	7.53679	7.07338	7.74848	7.52225	7.03358	7.23566	7.13949	7.32226	6.89475	7.50529	7.41425	7.39784	7.36007	7.09864	7.43307	7.34687	7.147	7.04185	7.04623	6.97104	7.50199	7.09525	6.8942	7.75661	7.84439	6.9559	7.28491	7.42402	7.26667	7.14825
ENSG00000072195	0.434823	6.16492	6.45169	6.37855	6.49707	6.30921	6.54813	6.15806	6.54082	6.81133	6.45214	6.21587	6.25996	6.30161	6.39081	6.48277	6.34843	6.83283	6.21757	6.54492	7.97774	6.09057	6.50962	6.92087	6.71641	6.58586	7.17609	5.99693	6.61418	6.23038	6.68684	6.51977	6.68358	6.09481	5.9373	5.84275	5.81846	6.41811	5.68219	6.81078	5.99959	6.90113	6.55012	6.6824	6.03156	6.34965	5.6515	6.08036	5.94393
ENSG00000072210	0.628543	8.9137	8.81543	8.7071	9.03546	9.12107	9.17045	8.6692	8.93846	7.99175	7.97068	9.30248	9.36814	8.85406	8.77872	8.70443	9.04203	8.45267	9.98179	8.23028	8.61311	8.0779	8.25816	8.59846	8.66324	8.17269	8.77788	8.6007	8.38108	8.77343	7.98566	8.93752	8.41165	9.16458	8.92739	9.45415	9.19947	8.86687	8.88943	8.88578	7.76663	8.82646	8.87387	8.43131	10.273	8.48319	8.31025	9.0475	8.57313
ENSG00000072310	0.499343	7.09116	7.38231	7.17623	6.92724	7.21884	6.73814	7.2654	6.90727	7.16597	6.9092	7.11044	6.90139	6.8589	6.86562	7.25822	6.70738	7.1698	9.58283	8.8023	7.88287	7.54555	7.76182	8.65171	9.07425	7.83475	8.0195	9.63696	7.58291	8.66872	7.5716	7.44887	8.81949	9.23471	7.52746	7.92719	8.01984	8.25982	7.53693	8.70262	7.66163	7.27364	8.82128	8.28073	8.28177	8.86089	7.32978	7.90167	8.53714
ENSG00000072364	0.770006	4.86358	4.81202	4.6722	4.743	4.54735	4.6159	4.72192	4.93636	4.84021	5.06655	4.79539	4.80182	4.72417	4.81807	4.66238	4.66243	5.07169	5.44806	5.36682	5.22213	5.42821	5.25812	5.20468	5.28752	5.06769	5.09764	4.89194	5.59667	4.89196	5.22678	5.52752	5.42232	5.34353	5.58551	5.72529	5.09805	4.99176	5.41202	5.36335	5.15161	5.2096	5.50895	5.85816	5.61136	5.14995	5.13156	5.45823	7.02243
ENSG00000072401	0.612927	5.22248	4.78238	4.91563	5.06871	5.09436	4.99961	5.10191	4.69881	4.60338	4.58916	4.91214	4.92802	4.82228	4.82726	4.61206	4.93338	4.96665	4.7026	4.6473	4.58922	4.55831	4.6557	4.47534	4.50845	4.51962	4.62926	4.75713	4.72613	4.49514	4.50649	4.88269	4.66231	4.51764	4.54675	4.52555	4.69406	4.71329	4.5571	4.58272	4.76352	4.92055	5.96664	4.53802	4.77964	4.77839	4.99872	4.50462	4.48439
ENSG00000072415	0.835907	5.94572	5.45162	5.24192	5.27129	5.37986	5.47748	5.20733	5.62737	5.77629	6.00423	5.33657	5.39244	5.14638	5.4469	5.03235	5.02857	5.28302	5.12633	5.35051	5.23489	4.89227	5.40861	5.77548	5.18179	4.74163	5.2888	5.64363	4.9641	5.10815	5.21062	5.30775	5.28061	5.47727	5.99603	5.32926	5.29087	5.02978	5.25767	5.40518	5.97019	5.32289	5.76427	5.12944	5.25601	5.33457	5.06882	5.33231	5.66344
ENSG00000072422	0.755482	5.56258	5.2932	5.15303	5.22011	5.43453	5.10216	5.24236	5.29757	5.72672	5.965	5.6239	5.33604	5.281	5.23832	5.06027	5.07794	6.02092	5.76378	5.39929	5.45405	4.9096	5.44985	5.47579	5.76714	4.97717	5.39907	5.72283	5.97033	5.18207	5.58414	5.39806	5.55363	5.26378	6.91761	5.3209	5.70414	5.31688	5.37959	5.36493	7.65539	5.61223	8.96328	5.24806	4.77974	5.72029	6.23633	6.43879	5.74469
ENSG00000072501	0.588725	7.23096	6.90948	7.34199	7.33698	7.39093	7.41636	7.25528	6.90114	6.74154	6.57984	7.36745	7.40403	7.60704	7.66693	7.07635	7.84465	6.71492	5.7087	5.59128	6.03852	6.2567	5.2925	6.16394	5.65262	5.5068	6.2571	6.09899	5.5193	6.92054	5.86213	5.67551	5.57942	5.944	5.85993	5.85303	6.05093	6.59713	5.92817	5.80997	6.11037	6.30579	5.43542	5.80635	6.01606	5.89975	6.35119	6.11635	5.19081
ENSG00000072506	0.58301	10.4316	10.4964	10.8373	10.686	10.7296	10.583	10.7053	10.7373	10.4871	10.4508	11.0662	10.5467	11.0597	11.1507	11.1209	11.3696	10.2884	9.67331	8.04847	8.7277	8.86533	8.46317	8.70095	8.20938	9.09287	8.74192	8.63378	8.79218	9.33955	9.6494	9.38705	8.18394	8.79447	9.4734	9.98238	8.8333	9.52373	8.48394	9.22821	8.89302	9.28801	8.66128	9.22104	9.18413	8.76272	8.89627	8.61885	7.92881
ENSG00000072518	0.250958	5.92407	6.05059	6.01385	6.16058	6.19088	5.77638	6.11851	5.81025	5.73922	5.64962	6.05169	5.88326	6.03429	6.0868	6.33139	5.98939	5.8908	6.05368	6.01545	5.82135	6.36342	6.04669	6.03311	5.68149	5.96425	5.98297	6.00455	6.15917	5.78111	6.12301	5.98132	5.99214	6.15292	5.77353	5.93571	5.49222	5.95678	5.81985	5.75011	5.88027	5.90877	5.74242	6.23501	6.19045	5.82898	5.93751	5.78968	5.91186
ENSG00000072571	0.767965	9.56914	8.54906	9.37077	8.94298	9.43025	9.20727	9.45127	8.76191	6.65907	6.75083	9.33135	9.37879	9.35226	9.51797	8.55398	9.66837	8.1338	6.81733	6.39636	6.2485	6.9391	6.38617	6.34556	6.32197	6.32368	6.62239	6.46756	6.30589	8.97128	6.63943	6.9465	6.48802	6.63188	6.60085	6.80316	5.98249	6.24094	6.66083	6.69174	7.53082	6.51556	6.70918	6.81852	6.51924	6.41589	6.4782	6.52236	8.52403
ENSG00000072609	0.939456	8.05923	8.01509	8.10996	8.47928	8.28526	8.31543	8.31339	8.09521	7.99269	8.32717	8.3521	8.11346	8.36485	8.20521	8.22919	8.32185	7.47743	6.97313	7.44874	7.58176	7.92932	7.38719	6.97748	7.48416	7.72184	7.35385	7.50755	7.86551	7.36246	7.24109	7.14082	7.30959	7.73756	6.72998	6.99542	7.64979	7.22184	7.37199	7.46245	7.88625	7.4574	6.81401	7.28746	7.20899	7.5088	7.91782	7.68124	7.50538
ENSG00000072657	0.793294	4.90495	5.02735	4.73307	4.63639	4.46604	4.84271	4.90353	4.59489	6.93789	6.96557	4.65623	4.61165	4.48927	4.63189	4.59507	4.82007	4.81427	4.70244	5.42833	4.55754	4.62074	5.67173	4.45698	5.32976	4.89097	4.72773	4.65583	4.70336	4.57945	4.61806	4.84147	6.42245	5.37925	5.36436	4.7604	4.79781	5.28312	7.87894	4.5814	4.62597	4.67912	4.52681	4.46454	4.53411	4.66209	5.69304	4.37119	4.66209
ENSG00000072682	0.780982	8.06563	8.07905	7.84965	7.44309	7.96504	7.34311	7.88977	7.40464	11.4114	11.4846	7.85412	8.28463	8.48648	8.74289	8.32986	8.81074	8.90736	6.96567	6.71735	7.695	6.75713	6.85672	6.91849	5.98366	6.38017	7.65978	6.44252	6.53761	6.9938	7.23431	8.14566	6.81424	7.68353	7.38402	6.33301	8.68308	7.544	8.30146	8.74594	8.02943	8.13919	6.61676	8.43076	8.14308	6.78616	7.12119	7.40149	7.13017
ENSG00000072736	0.807124	6.38154	6.55684	6.44761	6.57145	6.45166	6.62006	6.54249	6.60659	6.36596	6.40387	6.55132	6.4578	6.45137	6.61336	6.62791	6.54888	6.5504	6.39995	5.77028	6.38292	6.97172	5.93392	6.25515	5.88409	6.07471	5.97001	5.8981	5.91639	6.36724	6.23556	6.12961	5.89465	6.46807	6.157	6.19537	6.40667	6.37559	6.03209	5.80182	5.95123	6.23281	7.17298	6.25053	6.66976	5.76672	6.40328	6.19487	6.77312
ENSG00000072778	0.389235	9.13765	9.61512	9.20042	9.22475	9.52995	9.34867	9.58045	9.04122	11.018	10.874	9.13868	9.34482	9.32192	9.35485	9.87176	9.58591	9.42686	10.8054	8.86815	9.3268	8.98432	9.01906	9.83684	9.03453	9.62937	9.59188	8.93331	7.82602	9.75717	8.85016	10.9654	8.95145	10.2984	9.9068	10.6287	9.60531	9.25454	9.7529	10.5035	9.34586	10.1126	10.392	9.12345	10.0239	9.7913	8.81803	10.2476	9.10186
ENSG00000072786	0.843304	6.42419	6.75668	6.71359	6.62742	6.49392	6.54218	6.74953	6.51175	7.25144	7.11343	6.59832	6.37524	6.62172	6.56193	6.62943	6.41882	6.25872	6.70223	6.20068	6.88309	8.52865	6.30704	6.68866	6.34081	8.18511	6.78631	6.33801	6.53307	7.22938	6.97967	6.4234	6.17699	6.94008	6.6845	6.93186	7.64174	6.7865	6.70519	6.42222	7.35375	6.5253	6.2509	6.54815	6.9119	6.7429	8.55256	7.04208	7.56867
ENSG00000072803	0.67482	6.98995	6.716	6.67388	6.86149	6.90403	6.84976	6.7921	6.8964	6.75698	6.64738	7.15019	6.99618	6.64919	6.88901	6.84111	6.78762	6.61809	6.82498	7.42009	6.49978	6.16838	6.92513	6.49346	6.9651	6.89725	6.54013	7.1963	7.65072	6.04277	6.40164	7.16724	7.28398	6.27166	6.95365	6.25223	6.55195	7.06183	6.80039	6.84792	6.44646	6.42229	7.0963	6.46476	6.5687	7.12987	6.44846	6.5789	6.54499
ENSG00000072818	0.308836	6.95222	7.14676	7.34397	7.3543	7.24016	7.30601	7.00635	7.49467	6.51276	6.85127	7.0304	6.97933	7.13454	6.78372	7.69016	7.12735	7.29523	6.87768	6.56916	6.60005	7.9881	6.7708	6.15396	6.90215	6.66804	6.46591	6.46204	6.56603	6.60996	6.6843	6.79039	6.41214	6.78992	6.75374	6.77282	6.49786	6.09682	7.09668	6.47411	6.38695	6.51767	6.72725	7.29563	6.47701	6.43281	7.39226	7.0153	6.13288
ENSG00000072832	0.838734	8.98544	9.17439	9.29765	9.53063	9.32379	9.25985	9.16955	9.39476	7.14715	7.36561	9.0412	8.67842	8.54686	8.94606	9.13576	8.9358	10.4692	8.28736	9.23748	7.5286	7.95831	9.25172	7.22938	8.93103	9.58885	7.5726	8.29718	11.6047	7.97917	9.0196	8.32542	9.21082	7.75085	7.93653	7.90626	7.6314	7.65955	8.21555	8.89248	7.62211	7.42575	8.12396	8.10972	7.12828	8.43504	7.49101	7.69639	7.69668
ENSG00000072840	0.504665	6.59276	6.63668	6.42062	6.50074	6.17283	6.4922	6.38174	6.42875	7.31216	7.34951	6.49949	6.6158	6.44982	6.37601	6.72543	6.51673	6.79205	7.04676	6.43358	7.09636	6.87064	6.53548	7.25961	6.44192	6.70056	6.86432	6.62141	6.78164	7.29057	7.58077	6.88662	6.46527	7.05681	7.34373	6.89175	7.02716	7.3613	6.76603	6.49499	6.61814	6.76324	7.01489	7.16353	7.02939	6.68857	6.95817	6.91434	6.88822
ENSG00000072849	0.80568	9.07143	8.70577	8.72621	8.85753	9.01317	8.90087	9.07885	8.89854	9.72237	9.54246	9.18964	8.90614	8.74234	8.57814	9.33023	8.43442	7.85055	7.74903	6.54854	7.0889	7.20575	6.46907	6.84391	6.34809	6.40362	6.60419	6.59366	6.43021	7.64723	6.59277	6.88532	6.51583	7.00427	7.41717	7.0375	7.39082	7.11263	7.82241	7.84102	7.46888	7.91323	6.78478	8.23008	7.24501	6.95657	6.85534	7.32478	8.49027
ENSG00000072858	0.344672	4.02515	4.25383	4.09945	4.02668	3.88339	4.25279	3.93519	4.05933	3.79994	4.24495	4.24357	4.04872	4.23601	3.94516	4.06162	3.8939	4.28953	4.65205	6.05095	4.72024	4.93319	5.42959	5.77534	4.54399	5.76718	5.2684	4.95956	4.53951	4.46873	4.46966	4.48337	5.73691	4.6548	4.54291	4.48517	4.92159	4.36838	4.87545	5.81913	4.34573	4.77411	4.5279	5.779	4.65827	5.85994	5.32307	5.34414	4.70968
ENSG00000072864	0.387194	7.73389	7.79442	7.95848	8.08456	7.9596	7.73866	8.01121	7.6376	8.24178	7.73832	8.02289	8.03477	8.52537	8.08676	8.36464	8.43591	8.19965	7.97286	8.15425	7.69245	9.24765	8.53473	8.43345	8.53137	8.45625	7.84714	9.1082	7.81067	8.10741	8.5299	8.01662	8.35274	7.99187	7.56577	7.61094	7.82608	8.06635	7.65822	6.90935	7.5721	7.63662	7.65944	7.79761	8.91296	8.53929	7.97107	7.87958	8.26089
ENSG00000073008	0.601455	5.95296	6.14106	6.00358	5.99598	5.96968	6.02277	5.93717	6.14147	6.35139	6.32392	5.90942	5.99214	6.15193	6.01011	6.30278	6.10562	6.24441	6.72074	6.31514	6.10573	6.32921	6.37844	5.95729	6.30123	6.2684	6.23944	6.18034	6.41715	6.29256	6.47495	6.54103	6.211	6.46958	6.36536	6.59637	6.29888	6.18873	6.49504	6.21323	6.33962	6.38741	6.30774	6.66681	6.0383	6.11574	6.19411	6.23278	6.20766
ENSG00000073282	0.373242	5.50123	5.6173	5.58951	5.65667	5.50747	5.50053	5.58114	5.71194	5.45567	5.59036	5.43882	5.52478	5.64242	5.5521	5.58033	5.60759	6.06091	6.368	6.04697	6.36219	6.1421	6.19334	6.68154	6.24247	6.16443	6.0573	6.02476	6.05683	6.01759	6.11823	6.42404	6.11742	6.26298	6.3252	6.1255	5.9648	5.97045	6.12467	5.94668	6.50744	6.42121	6.85621	6.63068	7.89093	6.13837	6.14536	6.05778	6.17676
ENSG00000073331	0.206444	6.65964	6.96362	6.9069	6.96877	6.58146	6.94133	6.66308	7.01076	6.60788	6.48545	6.57513	7.09469	7.25907	7.03036	7.20497	6.9856	6.12124	6.57318	6.45747	6.65626	6.89898	6.35234	6.74324	6.3663	7.21847	6.9313	6.6915	6.48967	6.45546	6.54505	6.62479	6.58419	6.51317	6.20939	6.54384	6.72109	6.90652	6.22135	6.64259	6.01985	6.39174	5.80182	6.5255	7.01872	6.00349	6.20069	6.73951	5.83526
ENSG00000073350	0.830145	5.5689	5.90931	5.98114	6.02824	5.69493	5.85612	5.59157	5.70487	4.79672	4.93269	6.03748	5.80949	5.96377	5.82336	6.0604	5.7841	5.15746	5.23174	5.0588	5.04121	5.25801	5.05073	5.64588	5.23443	5.21728	6.95755	5.37476	4.94175	5.56871	6.21192	5.16417	4.94625	6.35725	5.97447	5.37736	5.97833	5.11367	5.79186	5.70038	5.35358	5.30431	5.15827	6.12069	6.24287	5.29013	5.45428	6.41731	5.34593
ENSG00000073417	0.969584	6.39503	6.42917	6.34294	6.41998	6.22259	6.12586	6.40279	6.23088	7.25878	7.22234	6.2637	6.58607	6.81304	6.63874	6.21758	6.44862	6.6804	7.73435	8.31065	7.8222	6.76716	7.50622	7.62726	8.48095	6.63303	8.71801	9.42762	6.81849	7.40983	7.04474	7.2978	8.38469	8.06484	8.18659	7.86066	8.09098	7.63865	8.29241	8.04892	7.46998	7.51651	7.17085	6.87153	7.51659	8.5804	7.11578	8.04192	7.91611
ENSG00000073536	0.639028	6.60126	7.22403	7.22813	7.43429	7.10602	7.02963	7.16565	7.35447	6.4106	6.44352	7.45955	7.07791	7.27133	7.47943	7.19468	7.22361	6.37254	6.56218	6.51334	6.59674	7.03229	6.61937	6.67689	6.29228	6.79395	6.39399	6.36172	6.90151	6.91676	7.4364	6.36588	6.48101	6.31856	6.28323	6.56269	6.67476	6.65421	7.12856	6.43497	6.44578	6.36113	6.59592	6.85574	6.4652	6.37113	6.6967	6.72819	6.31684
ENSG00000073584	0.821705	9.86215	9.64439	9.84976	9.99543	9.98754	9.90576	9.86651	9.92718	9.76869	9.44678	10.0502	10.0142	9.88769	10.0124	9.75832	9.61502	9.8301	7.45624	7.63856	8.90444	7.33266	7.38828	9.01193	7.53173	7.3674	8.55322	8.03052	7.79731	8.36598	8.36446	8.03524	7.67435	8.16823	8.20328	7.675	8.39943	9.14973	7.78453	7.88743	9.17098	8.80854	8.03475	7.1473	8.50737	7.78466	8.47157	8.07951	8.14384
ENSG00000073598	0.110673	5.87096	5.98695	6.07432	6.13289	5.66708	5.81753	5.59492	6.11008	5.918	5.8541	5.75548	5.62995	5.59726	6.01347	6.32933	5.88642	6.37797	6.39113	5.86244	5.83115	6.2197	5.97966	5.69014	6.15563	5.91444	5.81938	5.76795	6.15431	5.9103	5.98221	6.97619	5.99267	6.5103	6.21531	5.94202	5.64868	5.83207	6.11664	6.17049	5.64216	5.78619	6.5979	6.31258	5.67163	5.99283	5.82234	6.16347	7.42998
ENSG00000073605	0.274146	6.09807	6.03794	5.99591	6.11531	5.99645	6.06327	6.02779	5.81026	6.2047	6.17448	6.02253	6.11487	6.35969	6.20943	6.77353	6.35843	6.05024	6.14367	5.91787	6.30157	6.99934	6.26273	6.60824	6.24799	6.59325	6.95099	6.2051	6.4369	6.6251	6.38605	5.8525	6.3638	7.75273	5.94051	6.72608	6.33065	6.03485	6.15182	6.01304	6.03435	5.73107	5.82102	6.2745	6.69711	6.12288	6.03633	7.22214	6.36093
ENSG00000073614	0.718445	6.13179	6.32375	6.03943	6.16776	6.20944	5.90449	6.08545	5.70633	6.19752	6.19309	6.30892	5.9574	6.05354	6.01296	6.01882	5.93846	5.87314	6.23531	6.0505	6.23773	6.14456	5.70871	6.67242	5.54983	6.00833	6.09426	6.12516	6.23457	6.10898	6.04084	5.68876	5.90897	6.08835	5.85244	5.84784	5.77479	6.62147	5.69704	6.29943	6.03011	6.2684	5.75579	5.32336	6.56697	5.80747	6.45158	5.69735	7.05435
ENSG00000073670	0.741812	7.19303	6.70898	6.70479	6.91284	6.63078	6.70083	6.83664	6.80612	6.78681	6.887	7.12612	6.6578	6.78795	6.73104	6.89151	6.88038	7.19767	7.86996	8.05814	7.74729	8.22894	8.36292	7.42606	7.96358	8.01317	7.7651	7.64364	8.17132	7.7616	7.88324	8.04208	7.6043	7.847	7.81372	7.96277	7.50221	7.49625	7.72564	7.45328	7.58045	7.64736	8.08027	8.19019	7.45273	7.83196	7.64441	7.46246	7.58043
ENSG00000073711	0.803237	6.57007	6.35196	6.33739	6.53817	6.4857	6.39066	6.50211	6.2066	7.34402	7.21884	6.49374	6.46222	6.4398	6.53965	6.46928	6.40404	6.68209	6.62865	6.6097	6.80046	6.34632	6.41627	6.90734	6.78965	6.37323	6.98316	7.06354	6.64165	6.57211	6.34685	7.44193	6.70423	6.44179	8.88852	6.25513	6.39393	6.66599	6.60685	6.64402	6.50015	7.16705	7.95523	6.51215	7.15144	6.72731	6.21743	7.1731	6.90895
ENSG00000073712	0.828847	9.07876	8.88931	8.72789	9.37328	9.08651	9.05403	8.84539	8.51953	8.30128	8.32289	8.82209	8.4697	8.14727	8.62111	8.68393	7.89807	7.31487	5.68172	7.25482	8.73412	5.40882	6.23308	6.76273	6.69673	5.8858	7.50737	7.45796	6.805	6.45485	7.04791	7.40394	6.89736	6.38002	7.17943	7.40416	7.32041	8.25905	6.75029	6.63176	8.9088	8.48178	7.34329	5.54502	6.6876	7.1712	6.76718	6.28638	6.47959
ENSG00000073734	0.0765639	4.78965	4.74076	4.81423	4.91895	4.63899	4.75041	4.73491	4.86336	4.73578	4.93033	4.78748	4.84373	4.74054	4.81834	4.85662	4.94073	4.99372	5.01072	4.91338	4.83919	5.06215	4.8614	4.72483	4.84692	4.95295	5.10264	4.85895	4.67705	5.02066	4.88497	5.22064	4.83204	5.04878	4.95202	5.68307	4.87258	4.85467	4.93893	4.74629	4.90555	4.7856	5.06592	5.04146	4.7707	4.95423	5.01537	4.93645	5.20197
ENSG00000073737	0.559261	6.30163	6.57833	6.54069	6.54078	6.05947	6.82131	6.2709	6.20851	6.59566	6.71319	6.54924	6.46487	6.59375	6.41038	6.43716	6.53899	6.91942	7.30646	7.29065	7.19096	8.20209	7.43066	7.11784	7.56917	7.43211	9.23892	8.09166	7.49716	7.17387	7.51352	7.17545	7.46819	7.24793	7.21012	7.16669	8.24853	7.26245	7.32782	7.32031	7.55281	7.0999	6.9699	7.2183	7.72727	7.79133	8.09077	7.24814	7.54218
ENSG00000073792	0.935402	9.38202	8.80358	9.3419	8.79962	9.65103	8.83785	9.15995	8.66318	8.43306	8.12252	9.45146	9.09632	9.17548	9.08884	9.42567	8.96944	9.12329	6.9835	6.22293	6.734	7.60977	6.57757	6.98429	5.97082	6.96546	7.4525	6.36587	7.25608	8.86441	7.60816	7.16329	6.26853	7.84177	6.97058	6.19634	7.14017	7.26886	6.9733	6.15535	7.5648	6.83419	6.32852	7.02389	7.63666	6.53827	6.39759	7.58567	7.21605
ENSG00000073803	0.242235	4.97444	4.89545	5.03791	5.1026	4.93451	5.01483	5.01011	4.89138	5.15999	5.17134	4.94124	4.9943	5.25234	4.93637	5.10441	5.01929	5.44535	5.89247	5.34397	5.22697	5.30144	5.54415	5.32556	5.31652	5.53509	5.47048	5.28183	5.74259	5.34116	5.38046	5.38069	5.42916	5.70567	5.45555	5.44946	5.32032	5.1425	5.7089	5.20166	5.16565	5.18762	5.1706	5.70589	5.24775	5.14342	5.27847	5.39099	5.19518
ENSG00000073849	0.739495	6.45091	6.43952	6.46788	6.4029	6.44909	6.43187	6.4318	6.42433	5.26364	5.29776	6.46	6.38742	6.31785	6.36224	6.36366	6.22475	6.09633	6.23011	6.11263	6.0836	6.83455	6.14703	6.17849	6.07359	5.69996	6.36481	6.25913	6.71935	6.66018	6.33635	6.17448	5.99801	5.82317	7.05052	7.50037	6.33303	6.01465	6.236	5.9204	5.85497	6.47501	5.80854	6.07658	5.88318	6.36756	6.90992	5.93013	5.57872
ENSG00000073910	0.562807	5.49006	5.3911	5.39416	5.41661	5.4387	5.38391	5.45196	5.14638	5.43714	5.42572	5.615	5.30361	5.29134	5.31323	5.29243	5.09263	5.69215	5.32202	6.33475	6.75624	5.35385	5.95779	5.9034	6.13268	6.30919	5.57923	5.67753	6.95205	5.30111	5.44347	6.58177	6.13276	5.19557	5.68032	6.17745	6.69981	5.6858	5.5519	6.45302	5.27366	6.53464	5.74494	5.27086	5.99443	5.89292	5.44115	5.90922	5.47535
ENSG00000073921	0.654744	6.3323	6.12526	6.04253	6.10565	6.15047	6.17567	6.12419	5.89116	6.49797	6.53945	6.13706	6.24711	6.35472	6.38246	5.9967	6.19405	6.41862	6.10627	6.85918	7.31797	6.57556	6.57448	7.12257	6.67712	6.28226	6.97119	7.34484	6.71331	6.81755	6.49984	6.55562	6.7569	7.00392	7.39186	6.64104	6.90213	7.10029	6.70042	6.22857	7.71208	6.97963	7.21297	5.84531	7.10233	7.1595	7.8012	6.758	6.909
ENSG00000074047	0.364797	6.42955	6.57308	6.4864	6.50471	6.64344	6.45934	6.45029	6.51703	6.07132	6.10198	6.55554	6.26553	6.57785	6.53918	6.82426	6.59671	6.56133	6.20655	5.82381	5.90076	6.22805	6.00929	6.0085	5.75647	5.90442	6.13781	5.86477	6.22953	5.96206	6.6746	6.33808	5.75483	6.04518	6.02883	6.29247	6.09127	6.30361	5.87845	5.91052	6.08155	5.85517	6.12788	6.25513	5.94171	6.0288	6.10656	5.89793	6.29773
ENSG00000074054	0.85556	7.55418	7.42197	7.42618	7.48613	7.89523	7.19005	7.80029	7.08589	7.2814	7.16601	7.7394	7.64956	7.27686	7.26708	6.97337	7.05737	8.00076	8.23488	8.75642	8.29506	7.55217	8.62993	7.87726	8.01155	8.95071	7.64807	8.07429	9.71226	7.74093	7.99787	8.48834	8.64878	7.0905	7.80161	7.20586	7.59021	7.85391	7.57088	7.80393	7.01906	8.0412	8.66546	7.09386	8.18863	8.23901	7.80335	7.56179	7.02095
ENSG00000074071	0.87344	8.95924	9.00913	9.37047	8.76012	9.15008	9.00306	9.35074	9.50134	8.49811	8.46747	9.43234	8.61434	8.79381	9.23239	9.71666	8.96187	7.96621	7.69284	7.29334	7.31782	8.20442	7.84238	7.59768	7.23384	8.17975	7.36186	7.43609	7.61954	8.3176	8.18468	7.18891	7.37392	7.33732	7.30281	7.44038	7.31326	7.99422	7.04555	7.37854	7.25317	7.16823	7.54299	7.59523	7.70137	7.46011	7.47514	7.46871	6.69498
ENSG00000074181	0.682144	7.07035	7.44825	7.49181	7.41794	7.41642	7.28273	7.42387	7.20976	6.966	6.937	7.23525	7.16105	7.27001	7.31696	7.33548	7.11077	7.50117	7.33729	7.26941	7.7869	7.37367	7.26841	7.86542	7.49593	7.60691	7.17191	7.26473	7.2262	7.09891	8.78949	7.92265	7.35875	7.33376	7.56591	7.42401	7.48904	7.84446	7.56001	7.43863	7.60076	7.51393	8.00007	7.56125	8.26693	7.63219	7.69312	7.57508	7.02042
ENSG00000074201	0.466896	10.2397	9.912	10.0723	10.0753	10.2655	10.3605	10.2722	9.5302	9.56202	9.30692	10.057	10.1122	10.0364	10.0144	9.90996	10.1268	10.0927	7.69557	7.78762	7.67094	7.56012	7.75529	7.72447	7.62186	7.49058	7.50706	8.02935	7.5739	7.82807	7.33279	7.44017	7.74025	7.13944	6.93283	7.51184	7.52045	7.7596	7.89021	8.09713	7.85469	7.6595	7.4663	7.41446	7.70009	8.46603	7.70401	7.96733	7.51494
ENSG00000074266	0.710842	6.8901	6.47016	6.30458	6.6678	6.73765	6.63325	6.51271	6.52863	6.31535	6.19752	6.70676	6.78583	6.32796	6.46074	6.27103	6.38998	6.41003	4.61665	5.32416	5.3447	5.23531	5.16834	5.60339	5.22133	5.40179	5.04136	5.29867	5.19172	5.49632	5.12598	4.73975	5.39997	5.3081	4.88059	5.034	5.26456	5.4354	5.15339	5.49884	5.73425	5.55039	4.75737	4.81241	5.50561	5.25287	5.21633	5.13692	5.2458
ENSG00000074276	0.347981	6.6672	7.008	6.93376	6.89275	6.79781	6.7143	6.71545	6.84397	6.82073	6.86027	6.77183	6.98763	6.85073	6.82674	6.855	6.81956	6.89344	6.8824	6.81226	6.89943	7.11089	6.96684	6.69357	6.76826	6.83383	7.7774	6.76416	7.23828	7.25725	6.9251	6.70058	6.79699	10.5093	7.60038	8.81891	6.85278	6.94904	6.95575	6.75869	7.0587	6.94005	6.88308	7.00062	6.84608	6.83006	7.17741	7.28421	7.68822
ENSG00000074319	0.591707	10.0109	9.81477	9.82811	9.95234	9.99568	9.99843	9.8593	9.8186	10.4299	10.3369	10.1624	9.95142	9.98229	9.86234	9.36501	10.0387	10.3967	9.765	9.33528	9.09595	9.24292	9.36321	9.30435	9.37051	9.10785	9.52272	9.65721	9.52427	9.53701	8.69886	9.44535	9.46289	9.29936	9.63195	9.03159	9.60546	9.02597	9.02896	9.98541	10.1646	9.69371	9.93735	9.19262	9.63989	9.58341	9.32011	9.51201	10.0604
ENSG00000074370	0.696768	6.18459	6.26012	6.44264	6.38331	6.39196	6.29743	6.16448	6.34934	6.17293	6.34421	6.38744	6.42306	6.41487	6.28006	6.44846	6.34367	6.37939	7.12162	6.55853	6.52042	8.02112	6.52679	6.62376	6.6626	7.24412	7.65059	6.35021	6.75976	6.84134	7.03259	6.90165	6.46023	7.24164	6.68969	6.66812	6.77243	6.36686	7.05496	6.47304	6.56046	6.5945	6.87611	8.81237	6.93444	6.51937	7.17584	7.69324	6.57425
ENSG00000074416	0.272955	7.00154	6.90039	6.47144	6.41166	6.30097	6.42764	6.45878	6.7943	9.86502	9.86378	6.76381	6.85202	6.57852	6.28874	6.28033	6.5328	7.21558	8.94366	9.94272	10.1217	8.84428	10.6394	8.68925	9.42864	10.5757	10.0342	8.98819	10.0607	7.41153	8.53489	9.50994	10.0764	9.19069	9.99502	9.91274	9.71593	7.88603	8.06461	7.92779	9.42689	9.33137	9.5074	9.20094	8.83019	8.59079	9.35524	8.64223	7.30194
ENSG00000074582	0.648712	7.97241	8.54631	8.397	8.36477	8.25327	8.42834	8.54462	8.39617	8.39567	8.42693	8.05162	8.32059	8.10123	7.95065	8.59216	7.89927	8.02199	8.23151	7.55603	7.98479	7.74188	8.10916	7.83858	7.67878	8.16549	7.86066	7.52035	8.0452	8.12686	8.18791	7.8045	7.60875	7.5274	7.56545	7.79131	7.65366	7.81429	7.56439	7.67456	7.3735	7.85845	7.73449	7.87864	8.12433	7.6666	7.71464	7.75049	7.56592
ENSG00000074590	0.419136	8.34562	8.3117	8.07841	8.00024	8.13538	8.07457	8.17683	7.7404	7.89945	7.74905	8.36057	8.10856	7.87025	7.45609	7.47122	7.20865	8.29944	7.31796	9.49969	7.55702	6.71868	10.3626	7.52319	8.62893	10.1128	7.11659	9.23764	9.17125	7.9539	6.83036	9.0938	10.2057	6.89405	8.04684	6.63638	8.306	7.87371	7.29864	7.61028	7.4288	8.64017	9.03868	6.98084	8.76575	8.44516	6.86384	7.49484	6.98524
ENSG00000074603	0.15256	9.76726	9.55757	9.48708	9.88084	9.89142	9.83691	9.80893	9.51459	10.5936	10.4183	9.81326	9.84943	9.96791	10.0223	10.0253	9.70122	8.74034	7.15738	8.95009	8.69305	8.07654	8.53035	8.40642	7.99306	8.36201	8.20638	8.62622	7.12759	7.55124	7.21323	8.26127	8.74679	8.23964	8.24551	7.35802	8.54281	8.30912	7.51989	8.31671	8.74989	8.61107	9.64326	6.64691	8.43479	7.15929	8.45317	8.22574	9.70556
ENSG00000074621	0.10966	5.28238	5.30986	5.27009	5.4139	5.0864	5.24188	5.19606	5.28106	5.40461	5.38684	5.18368	5.31646	5.40961	5.28646	5.14352	5.39957	5.48416	5.39773	5.37105	5.44748	5.59619	5.28845	5.75298	5.54145	5.40825	5.50026	5.42465	5.55106	5.60351	5.64324	5.54685	5.50051	5.51765	5.39937	5.46852	5.44551	5.46377	5.57182	5.51293	5.47255	5.2792	5.36287	5.53553	5.43431	5.533	5.57051	5.3994	5.45546
ENSG00000074657	0.373355	9.61553	9.95648	9.58724	10.1391	9.77642	9.78123	9.91085	9.5353	8.14784	7.95018	9.6812	10.0426	9.66384	9.79549	9.4734	9.75801	9.38998	7.68055	8.19542	8.59071	7.13636	8.22143	8.35188	8.49428	9.21219	7.94031	8.73538	9.72909	7.14005	9.03434	8.38512	8.43597	7.90169	7.27287	7.65506	8.49707	8.8142	7.33617	8.25826	7.5137	9.31989	9.22818	7.54622	8.10061	9.12852	7.82052	7.76517	8.55109
ENSG00000074695	0.769173	5.48515	5.3764	5.06349	5.27211	5.06486	5.26834	5.1101	5.26988	5.34776	5.3814	5.17147	5.17588	5.14779	5.19281	5.07637	5.35986	5.36666	5.30437	5.13484	5.46127	5.2328	5.20269	5.62095	5.20555	5.01881	5.45787	5.38108	5.05822	5.30085	5.51347	5.61996	5.08714	5.54196	6.02032	5.67699	5.07289	5.42263	6.08432	5.37513	5.83264	5.51015	5.78958	5.28229	5.30093	5.23661	5.54604	5.47971	5.27845
ENSG00000074696	0.80827	7.89285	7.52769	7.71241	7.53032	7.75715	7.4841	7.43993	7.58583	7.1627	7.14875	8.00179	8.01589	7.93745	8.09146	7.1034	8.2673	6.72771	7.39798	7.50493	7.14437	6.51602	7.01287	7.72589	7.26478	5.88681	6.29761	7.29538	7.69579	7.09261	7.6331	5.97472	7.3148	6.51024	7.40704	7.23568	6.50543	7.73121	6.49027	7.36217	7.7606	6.38554	6.04289	6.428	6.95224	7.6274	6.80447	7.63263	6.83342
ENSG00000074706	0.206216	5.34689	5.5363	5.46525	5.39777	5.24054	5.26302	5.35762	5.23418	5.20605	5.33064	5.38596	5.37108	5.37624	5.22432	5.24326	5.33407	5.4713	5.62731	7.38667	5.80242	6.24968	8.52063	5.48679	7.23186	7.94579	5.73924	6.28388	6.56206	5.59606	5.54955	5.8519	8.09924	5.68506	6.06941	5.80591	5.79342	5.87155	6.30636	5.6976	5.51587	5.48273	5.6397	5.70131	5.66338	6.18265	6.55946	5.6822	5.60416
ENSG00000074755	0.939612	6.20925	6.25093	6.21881	6.0219	6.00573	6.17998	6.06518	6.12278	6.45379	6.43304	6.10254	6.07213	6.04276	6.06703	6.04914	6.06417	6.16484	7.04723	6.97583	6.94912	7.37291	6.85838	7.14306	6.86617	7.14726	7.0695	7.15053	7.09584	6.99291	7.09044	6.76244	6.95592	7.67442	6.80112	6.87744	6.93635	7.11873	6.93408	7.12301	6.80942	6.7951	7.11065	6.97299	6.88485	6.9731	7.2644	7.22142	6.94491
ENSG00000074800	0.855622	10.1513	9.95639	10.3289	10.5143	10.2	10.5224	10.4807	10.347	10.0251	10.0236	10.282	10.2561	10.5103	10.7091	10.3771	10.2926	10.337	9.49019	9.52006	9.95446	10.5921	10.3503	10.2353	9.19222	9.58792	9.82932	8.99869	10.2802	9.90796	10.9546	8.65929	9.12729	9.77522	11.5756	9.94669	9.86995	10.2741	9.70469	7.92486	10.0348	10.2598	8.56974	10.0405	10.4984	9.6854	10.7766	8.50164	9.55937
ENSG00000074842	0.753655	9.13563	9.02613	8.75705	8.87489	8.95723	8.99706	8.9147	8.95258	10.7172	10.6921	8.9972	8.91304	9.0499	9.14974	9.23808	9.1642	9.06136	8.88305	8.14258	8.79519	9.22601	8.41154	8.68507	7.91663	8.32374	8.74277	8.29748	8.53272	9.44642	9.47116	8.20776	8.19372	8.93687	8.79961	8.99611	8.79822	9.27532	9.13414	9.47078	9.67271	9.42194	7.56791	9.65328	8.35131	8.01583	9.371	9.04243	8.24354
ENSG00000074964	0.862147	7.14499	7.11615	7.3127	7.45676	7.45326	7.04206	7.47897	8.00523	7.60727	7.28588	7.58733	7.15731	7.04504	7.47467	7.75219	7.28849	7.58864	7.19717	7.34321	7.65815	6.77806	7.36881	7.85498	7.14537	9.27108	8.02918	7.27967	7.70644	7.4631	7.46226	7.56506	7.43052	6.75166	7.67553	8.68745	7.67127	7.46613	8.28969	7.00146	7.03304	7.42974	7.56157	7.7283	7.99264	7.53938	6.54746	7.20947	7.00959
ENSG00000074966	0.19573	4.10071	4.47675	4.27397	4.3282	4.13591	4.54733	4.12658	4.52639	4.32717	4.41503	4.15025	4.39087	4.34136	4.325	4.27266	4.30588	4.5511	4.66583	4.43763	4.72205	4.4325	4.469	4.45121	4.60948	4.5089	4.77497	4.45245	4.55602	4.46093	4.69112	4.56276	4.47733	5.01668	4.53072	4.78972	4.509	4.71491	4.94799	4.53359	4.48272	4.53012	4.58804	4.62996	4.78352	4.39468	5.27988	4.63181	4.41596
ENSG00000075035	0.738308	5.4278	5.50491	5.61505	5.66627	5.43787	5.58016	5.54502	5.53334	5.74145	5.60614	5.27374	5.58248	5.53813	5.3645	5.96451	5.45879	5.91942	6.24736	5.76965	5.756	5.91196	6.03084	5.68755	6.20417	7.0414	5.8315	5.75087	5.87455	5.84864	5.70926	6.18076	5.74485	5.82918	5.81142	5.76693	5.72318	5.69971	5.70237	5.90153	5.63545	5.7107	5.96928	6.34234	5.86294	5.76995	5.84608	5.7967	5.74546
ENSG00000075089	0.713312	7.05918	6.35171	6.5617	6.33185	6.9401	6.79882	7.00812	5.82231	6.39525	5.73153	7.04055	6.92051	7.35733	6.79241	6.17785	6.85939	6.2173	4.74213	6.17481	5.71713	4.85738	6.09927	6.32804	5.93645	5.77816	5.49159	6.40664	5.25386	5.37978	5.19112	4.88655	6.57144	5.23402	5.4123	5.15794	5.69314	5.22617	5.1065	6.71258	6.44417	6.2003	5.102	4.87619	6.18146	6.13171	5.52817	5.34489	6.56812
ENSG00000075142	0.240331	8.03224	7.95046	8.04297	8.25863	8.10643	8.28389	8.07811	8.0627	8.33839	8.42989	8.39704	8.29859	8.06158	8.13713	8.01188	8.11339	7.85984	6.74954	8.81762	7.62278	7.02134	8.46383	7.51293	8.57179	7.68562	8.76983	8.81663	7.77728	7.48457	7.06563	6.57314	8.6493	7.85401	7.19097	5.94927	7.88338	7.34614	7.02323	8.33774	7.90111	7.47108	6.04866	6.41385	6.6752	8.96639	7.1033	6.76846	6.67437
ENSG00000075188	0.237803	10.3885	9.62081	9.95941	10.3365	10.3889	10.6543	10.1961	10.2463	9.80423	9.72665	10.6967	10.5555	10.6857	10.4745	9.965	10.7476	9.05456	7.298	6.57423	7.58556	8.03415	6.42363	7.3195	6.63374	6.42212	7.31493	6.61755	6.41797	8.749	6.93492	7.19626	6.70558	7.11297	7.07639	6.6609	7.31433	7.2563	7.00955	7.10701	8.5376	7.52663	6.98448	6.97454	7.32357	6.90082	7.17727	7.32	7.89091
ENSG00000075213	0.326388	6.79772	6.08354	5.94927	5.99776	6.6309	6.31495	6.43751	6.2323	6.50958	6.47263	6.43346	6.17998	5.90492	5.93654	5.93346	6.01223	6.09456	5.83537	5.6832	6.4497	5.77389	5.87507	5.50129	5.68958	5.54016	6.06479	5.64912	5.85104	5.44101	6.21097	6.13075	5.60978	5.81554	5.55988	5.65525	5.6599	5.64928	5.90095	5.82701	6.31991	5.59747	5.9609	6.45786	5.42741	5.58229	6.21363	5.59161	5.86164
ENSG00000075218	0.715606	6.87735	7.03683	7.16925	7.19809	7.1452	6.99554	7.18566	7.08511	6.2135	6.13857	7.3229	7.02145	7.16277	7.14003	7.16372	7.15841	6.74576	6.22678	6.03234	5.91278	7.19021	5.96165	6.11635	6.1255	6.28867	6.10225	6.12103	6.23327	7.08363	6.40346	6.17202	6.02429	6.03858	5.98489	6.32049	6.03194	6.14708	6.07401	6.11489	5.95147	5.94893	6.13596	6.33272	6.23515	5.98437	6.14107	6.09407	6.32889
ENSG00000075223	0.768148	5.29637	5.16314	5.04629	4.95935	5.00327	5.15864	4.94634	5.09029	8.1224	8.014	5.29109	5.24169	5.04236	4.96466	5.09171	5.0322	6.47203	5.42594	6.06655	7.48272	5.59441	5.63673	8.28041	5.45373	5.28832	7.27212	6.22668	6.36739	5.46909	7.00946	6.59845	5.98264	5.78416	5.73727	5.43837	6.32565	6.51437	5.48703	5.37792	6.15705	7.15081	6.9963	5.51613	7.18127	6.18781	5.75017	6.93254	6.36243
ENSG00000075234	0.712284	7.29472	7.39818	7.55125	7.26703	7.23089	7.32613	7.41771	7.66128	7.5669	7.57253	7.38829	7.16277	7.42667	7.22291	7.65071	7.235	7.23793	7.23033	6.73861	6.66163	7.42775	6.92848	6.92967	6.84878	6.93129	7.10894	6.80838	6.83524	7.32499	7.08063	7.21568	6.68344	7.39936	7.24493	7.67747	6.77197	7.04618	7.11285	6.82357	6.79861	6.72452	6.84978	7.27617	6.65921	6.79012	7.00543	6.87034	6.57625
ENSG00000075240	0.280817	6.28528	6.33594	6.32607	6.47679	6.3759	6.08779	6.232	5.97584	6.51884	6.39144	6.71237	6.57472	6.23408	6.19836	6.27994	6.29781	6.80287	8.05968	7.45985	6.85375	7.30915	7.25922	7.12987	6.7713	7.12729	7.91254	7.38839	7.71223	6.7256	7.87004	7.22565	7.565	7.71821	6.74474	9.92721	7.45004	6.87211	7.20622	7.26634	7.10119	7.20629	6.98817	6.96487	7.80046	7.15826	6.8652	7.21772	6.684
ENSG00000075275	0.906027	5.00202	5.0076	5.03913	5.02139	5.03341	4.98564	4.98231	5.00341	4.8239	4.74431	5.05223	5.07081	4.97419	5.06402	5.13429	5.00624	5.07791	5.22099	5.16857	5.08217	5.25343	5.17459	5.4725	5.08543	5.14082	5.15626	4.99975	5.24352	5.18825	5.84328	5.23433	4.98053	5.31665	5.46795	5.35621	5.30346	5.07412	5.25235	5.24963	5.25092	5.15572	5.17926	5.37678	5.33216	5.05769	5.23096	5.2486	5.10604
ENSG00000075292	0.766294	10.2764	9.81774	9.96781	10.0555	10.2987	9.75616	9.93571	9.86394	8.99788	8.8774	9.87944	10.085	9.54222	9.78159	9.79231	10.0096	9.06705	7.08871	8.8221	8.65285	6.74461	7.97769	9.38458	8.88288	8.24836	8.31316	9.39768	6.52582	8.59202	8.20447	8.14993	9.23222	7.85541	8.00404	8.28699	8.91154	8.34154	8.23475	9.54774	8.29437	8.97223	8.97265	6.89061	8.84425	8.83092	7.73388	8.53455	8.86724
ENSG00000075303	0.958991	5.67682	5.87596	5.94185	5.67006	5.94053	6.09954	5.8294	5.73774	6.0254	5.81455	6.00998	5.91901	5.85484	5.6647	5.69075	5.87808	6.11879	6.21215	6.06335	5.90457	6.31973	6.15971	6.19553	5.9676	5.83079	6.24088	6.00623	6.17168	6.09135	6.08017	6.121	6.23979	6.16227	6.06193	6.14651	5.65479	5.89585	5.86914	5.97113	6.04313	5.87312	5.86027	6.36248	5.85266	5.89254	6.17602	6.16666	6.20003
ENSG00000075340	0.594544	7.55965	7.70154	7.87025	7.68114	7.67273	7.60931	7.8122	7.98092	6.80117	6.64305	7.71486	7.72536	8.08947	8.12938	7.75094	8.36715	7.22867	7.32553	7.53781	6.68766	8.39355	7.47644	6.85428	7.71635	7.49505	6.92957	7.01462	8.45609	8.96021	7.16015	7.21156	7.55478	7.3243	7.17157	7.24381	7.08292	6.75286	7.46023	7.38694	6.76424	6.8493	7.07518	7.07859	6.91471	7.18126	7.13692	7.08955	6.70773
ENSG00000075391	0.81764	4.89821	4.61562	4.74399	4.73092	4.75126	4.827	4.76931	4.79793	4.73579	4.76906	4.73228	4.59981	4.64894	4.92515	4.73487	4.76126	4.72391	4.52731	4.54472	4.53569	4.55334	4.65361	4.58158	4.55721	4.55397	4.49433	4.57724	4.50944	4.5362	4.52371	4.63633	4.5117	4.43245	4.55157	4.55146	4.58187	4.47384	4.53449	4.5798	4.63128	4.64746	4.58362	4.67347	4.53311	4.61033	4.5823	4.47664	4.7607
ENSG00000075399	0.954437	6.16604	6.55747	6.11471	6.33775	5.73459	6.2321	5.97457	6.20668	6.77833	6.38913	6.26645	6.0529	6.08244	6.3179	6.38834	6.01729	6.13112	5.89662	6.51119	5.98988	6.26915	6.97016	6.60066	6.30653	7.07222	5.92281	6.31362	6.6129	5.97082	6.55021	5.68394	7.02493	6.2906	5.6018	6.44177	6.9341	6.04432	5.75459	7.01367	5.91584	5.83092	5.9903	5.99973	6.29953	6.43511	6.30195	6.05725	6.12197
ENSG00000075413	0.728339	7.84799	7.10673	7.65718	7.13582	7.92299	7.5165	7.91489	7.05999	7.861	7.36119	7.74584	7.49733	7.36064	7.52697	7.82018	7.46766	7.24506	6.5511	6.68381	6.57977	7.01968	6.87947	6.65418	6.57922	7.50591	6.53616	6.75617	7.29603	7.28682	6.54172	6.83874	6.92838	6.43472	6.31809	6.46662	7.24592	6.90822	6.74124	7.09128	6.91089	6.79277	7.23046	6.20146	6.99949	7.08369	6.69462	7.13046	7.1855
ENSG00000075415	0.800418	12.5721	12.4661	12.1342	12.5265	12.5052	12.7006	12.5407	12.5322	12.5588	12.7082	12.5487	12.6663	12.5789	12.5736	12.1833	12.544	12.3713	12.1768	11.8745	11.8693	11.2368	11.698	11.7135	11.41	11.8101	12.0905	11.4639	11.5956	11.6738	11.9359	12.8642	11.866	12.2101	12.1921	11.6348	11.665	11.8725	11.6834	11.9911	11.875	11.9542	12.3475	11.5005	11.6996	11.38	11.461	11.9	10.9267
ENSG00000075420	0.705914	8.19351	8.35203	7.72222	7.66465	8.15735	8.16423	8.20218	7.60551	9.40326	9.40166	7.82647	8.21808	7.97848	7.82222	7.14477	7.42274	8.71296	8.65669	5.69717	8.96499	7.78051	6.22169	9.12859	5.81011	6.054	8.13003	6.12229	6.02781	8.04633	7.70104	7.89154	5.71207	7.56794	8.36074	8.83005	9.11717	9.22207	9.47952	7.4835	9.74356	9.30904	8.60065	7.67597	8.38777	5.54041	8.78517	8.64598	7.62483
ENSG00000075426	1.03095	5.778	5.82343	6.08903	5.98338	5.8607	5.92882	5.99282	6.06988	6.39662	6.42107	5.7679	5.90965	6.13345	5.94838	5.92823	5.99033	6.42921	8.00871	6.26698	6.97393	7.3151	6.54287	6.49723	6.3611	6.4074	7.10377	6.21065	6.38666	6.18387	6.48598	6.72873	6.39561	6.90097	6.9649	7.02095	7.20856	6.78047	7.02358	6.41982	6.95541	7.06617	6.69549	6.62562	7.50989	6.84177	6.89383	7.10847	6.39814
ENSG00000075539	0.725509	7.13875	6.74031	6.50293	6.87945	6.83653	6.64227	6.8925	6.62382	7.24534	7.03695	7.05357	6.93214	6.92974	7.22388	6.6051	7.22659	7.1442	6.28335	7.90157	7.69538	6.15204	7.36937	7.67228	8.48876	7.06296	9.74175	9.47187	5.92598	7.57356	6.6961	7.17334	8.22451	7.8722	7.30817	6.69699	7.51629	7.1853	7.32913	7.78844	7.53448	7.5861	7.08644	6.17137	7.78245	8.51265	7.77335	7.41129	6.87735
ENSG00000075568	0.890198	8.28948	7.46739	7.40183	7.37771	7.88091	7.19425	7.73868	6.63568	8.73408	8.46565	7.62294	7.48447	7.34833	7.65881	6.92051	6.99778	7.58253	7.33395	8.05917	7.92574	7.22319	7.23008	7.64954	7.72483	7.61107	8.71628	7.89655	8.01543	7.42733	7.60708	7.15022	7.84958	7.97176	7.693	7.27417	7.93884	8.05582	7.77039	8.12039	7.9132	7.90344	8.51308	7.10832	8.43038	7.59577	8.24991	8.89459	7.80572
ENSG00000075618	0.592384	6.87036	6.90831	7.14707	6.88034	7.12527	6.91606	6.95763	6.83676	7.19722	6.93992	7.44619	7.21233	6.78837	7.01801	7.02998	6.90074	6.78568	6.53915	7.68738	5.96362	6.29461	7.21984	6.16103	6.76857	6.13839	5.61467	7.57672	8.5714	6.37367	7.96598	5.7974	7.13167	5.59975	5.98413	5.78574	5.66255	7.86787	5.89022	5.81551	6.47063	5.61565	5.69856	5.83094	6.71313	7.25665	6.74002	5.51257	6.42569
ENSG00000075651	0.771484	5.26431	5.33909	5.28997	5.18755	5.23713	5.23831	5.22919	5.36302	5.44975	5.45894	5.2308	5.21351	5.36987	5.1684	5.27291	5.34937	5.50344	5.65569	5.40175	5.48348	5.64978	5.56049	5.58232	5.43315	5.40899	5.7171	5.64957	5.39331	5.60828	5.42849	5.69314	5.33038	6.01255	5.63321	5.92006	5.47608	5.67479	5.66168	5.40457	5.67425	5.33185	5.61686	5.78989	6.04818	5.59261	5.74777	5.52612	5.70974
ENSG00000075785	0.590475	6.13493	6.15561	6.31216	6.1074	6.40884	6.22293	6.32368	6.03431	6.66905	6.57444	6.15358	6.23197	6.33057	6.20655	6.13507	6.30308	6.10768	6.38764	6.45973	6.32397	6.26401	6.36854	6.19864	6.26806	6.22104	6.22342	6.45504	6.25425	5.98003	5.93869	6.34401	6.44324	6.20215	6.2407	6.16421	6.53506	6.27289	6.08943	6.29077	6.3489	6.37356	6.5164	6.15443	6.40295	6.50483	6.33472	6.18969	6.06561
ENSG00000075790	0.910875	5.14041	5.08451	5.10823	5.03087	5.13984	5.07699	5.06971	5.10273	6.39761	6.06019	5.27223	5.00666	5.01188	4.93615	5.01107	5.09596	5.05184	5.1271	5.45077	5.15552	5.15109	5.19482	5.07529	5.54066	4.90483	5.26381	5.50937	4.90549	5.20167	4.74795	5.43835	5.36242	5.10145	5.14909	5.12516	5.05978	5.22932	5.30595	5.10214	5.46669	5.43943	5.74559	5.10995	5.17462	5.31192	5.25615	5.08526	6.03871
ENSG00000075826	0.509474	6.79214	7.31581	6.86939	7.18205	6.52321	6.73302	6.80569	7.24441	7.00404	7.28839	6.88165	7.12582	7.06598	6.81786	7.34104	6.912	7.8412	8.03476	8.21232	7.91443	8.02547	8.3205	7.92467	8.59114	8.77754	8.25872	8.22503	7.93116	7.67643	8.23875	8.56301	8.17884	8.18023	8.08459	8.25146	7.77428	7.95616	7.94871	8.39027	7.5647	7.57559	7.93329	8.0309	7.88081	8.4014	8.32321	7.88164	8.77576
ENSG00000075856	0.758499	9.13294	8.88689	8.98484	9.38538	9.40142	9.33492	9.18704	9.05441	8.02809	7.85979	9.32572	9.38296	9.16998	9.19203	9.37212	9.20553	7.8588	6.36134	6.87084	6.46541	6.75714	6.62079	6.80299	6.51926	6.97003	6.59046	6.94961	7.15976	6.65973	6.65706	6.38021	6.91542	6.40882	6.18042	6.47973	6.44513	7.03422	6.30337	7.08313	6.43085	6.67475	6.32907	6.22441	6.93292	6.53249	6.71217	6.34598	6.83381
ENSG00000075884	0.123036	5.55208	5.86931	5.25125	5.64063	5.86933	5.41361	5.42578	5.67189	5.72437	5.87239	5.99789	5.74758	5.43163	5.66006	5.35123	5.46075	7.06285	7.07283	6.79729	7.64962	7.65736	6.50428	6.994	6.09718	6.31487	7.24326	6.88538	6.7643	6.8029	7.32118	6.60358	6.26319	7.36497	7.40893	7.37925	7.93758	6.24304	7.4651	6.08523	7.03957	6.93731	7.27623	7.30194	6.19859	7.5724	9.04811	7.23816	7.98032
ENSG00000075891	0.703179	5.55153	5.73495	5.70977	5.7278	5.69761	5.73978	5.59036	5.71556	5.4946	5.65661	5.72451	5.82421	5.76846	5.76369	5.53851	5.84001	5.83952	6.04173	6.01941	6.18081	6.101	5.89757	5.92838	6.01909	6.58492	5.8169	6.08663	6.15685	5.95827	6.21964	6.00422	5.91406	6.11311	6.95471	6.23573	5.79756	6.11682	5.94451	6.059	6.0672	5.88019	6.04296	6.06558	5.92314	6.59394	6.2099	5.86443	6.15606
ENSG00000075914	0.776479	9.37481	9.19404	9.21042	9.35258	9.2758	9.36556	9.25638	9.28621	8.87632	8.69852	9.44451	9.28906	9.26226	9.29546	9.26777	9.43911	8.57513	8.15916	7.32804	7.32714	7.87171	7.78258	7.75473	7.14991	7.9387	6.99131	7.46586	7.65886	7.93017	7.68905	7.3062	7.35127	7.06115	7.54362	7.3406	7.69541	7.4998	7.36255	7.4392	7.49056	7.8592	7.41418	7.43684	7.96665	7.41676	7.33659	7.69292	7.78284
ENSG00000075945	0.450873	6.98189	6.25662	6.23297	6.25847	6.18174	6.38412	6.25371	5.98531	8.58314	7.85478	6.13594	6.24976	6.62226	6.31253	5.72054	6.47957	8.6349	7.27201	9.69435	7.71753	6.4442	9.7989	7.80127	9.04695	8.65867	7.93501	8.4523	10.099	7.4606	7.25546	8.8665	9.51025	7.41727	8.25563	7.28621	7.66393	7.57564	7.5139	8.79836	7.74388	7.76941	7.80745	7.3311	7.69766	8.79487	7.39571	7.34656	9.57355
ENSG00000075975	0.805464	6.36397	6.1724	6.18846	6.30753	6.38766	6.38165	6.32107	6.46704	6.91056	7.02836	6.28219	6.4673	6.76064	6.52969	6.4212	6.50057	6.98261	6.23649	6.58632	6.66269	6.99571	6.86018	6.61754	6.5017	6.77334	6.7215	6.68387	6.76111	6.55923	6.60052	6.67132	6.91138	6.74612	6.54107	6.68008	6.58331	6.68521	6.6516	6.74256	6.60377	6.62848	6.61869	6.65999	6.54801	6.68795	6.71537	6.82498	7.04766
ENSG00000076003	0.870989	10.9233	10.6535	10.9861	10.9125	11.1469	10.8961	11.0408	11.2258	9.03662	9.43774	11.0913	11.2183	11.0428	10.7982	10.6631	10.9027	10.435	7.02666	7.10051	7.95552	9.04306	7.16201	7.62136	7.33619	7.41008	7.35462	6.99022	8.32683	9.93585	8.25608	7.19318	7.33469	7.9104	7.51037	7.50479	7.3676	7.67111	7.73027	6.67415	9.11602	7.9177	7.45931	7.17159	7.54825	7.39408	7.67337	7.89429	8.61436
ENSG00000076043	0.688088	11.1697	11.1881	11.3125	11.0704	11.1015	11.1297	11.1569	11.0472	12.0682	12.0837	10.9519	10.875	10.8082	10.8908	11.1939	10.9919	9.55941	8.72158	8.13372	10.1101	9.06553	7.93486	8.76302	8.19371	7.6468	8.71041	8.53472	7.32342	9.59831	7.17708	10.3607	8.47127	8.0683	9.16667	7.91242	9.51423	9.85526	8.89775	9.67334	9.88479	10.2897	8.29878	9.76471	9.721	8.68684	8.92957	9.38748	10.0945
ENSG00000076053	0.909334	9.51511	8.65163	8.55263	8.97358	9.39777	9.012	9.29053	8.59287	8.35369	8.37326	8.94666	9.04852	9.04105	9.21417	8.35985	9.03123	7.67926	7.02143	6.78249	7.88185	7.01262	7.05434	7.92211	7.16467	6.80092	7.82761	7.32777	7.14884	7.11332	7.13112	7.28973	6.96853	6.99526	7.60349	7.93062	8.01014	7.5348	7.72833	7.31984	8.19622	8.19171	7.28593	6.79823	7.89142	7.33689	7.63531	7.64476	7.33373
ENSG00000076067	0.328326	5.65118	5.69399	5.71382	5.6467	5.58108	5.63981	5.56272	5.6121	6.29146	6.28549	5.70023	5.68969	5.77641	5.39817	5.74043	5.62992	5.95385	6.29094	5.9111	5.92545	6.09814	6.12861	5.94092	5.88659	5.9158	5.99124	5.90944	5.89556	5.97858	6.47154	6.15006	5.85451	6.05448	6.05637	5.88143	6.28582	6.08668	6.00026	5.82061	6.14805	6.02808	6.03492	6.37891	6.03493	5.88476	6.28542	6.12965	6.13555
ENSG00000076108	0.479316	6.80148	6.97889	6.99616	6.89466	6.95544	6.7858	6.75815	6.94287	6.73067	6.69125	6.76212	6.77297	6.67912	6.91713	7.12634	6.76097	6.87139	7.03099	6.57378	6.64779	6.99065	6.6486	6.95356	6.56637	6.80342	6.50497	6.53549	6.61273	6.76604	6.81672	6.84456	6.5327	6.88538	6.56732	6.67212	6.60146	6.61394	6.67375	6.73925	6.55282	6.68032	6.8071	6.94834	6.86763	6.59132	6.72952	6.62298	7.03469
ENSG00000076242	0.835817	10.2646	10.0528	9.82411	10.0524	10.2756	10.514	9.79901	9.8266	10.0267	9.81806	10.3688	10.5094	10.0266	9.70432	9.26048	10.262	9.89626	8.33337	8.95442	8.9486	8.78778	8.31871	8.80065	9.24948	8.70405	8.552	9.23561	8.62647	9.50919	8.51046	9.40241	8.99855	8.26899	8.5489	8.76624	9.14263	8.19748	8.22174	9.66813	8.96548	8.93951	8.98217	7.90457	8.33795	9.1122	8.88051	8.69647	10.0685
ENSG00000076248	0.660139	9.87285	9.70679	9.99607	9.76529	9.95971	9.75164	9.62668	9.35573	7.31494	6.81543	10.2251	9.76065	9.80276	9.7673	9.97435	9.55146	7.80621	7.5403	6.20952	6.3311	6.80153	6.1869	6.63206	6.66883	6.34497	6.37092	6.29134	6.56969	7.46921	7.2138	6.11931	6.44274	6.37642	6.18589	6.36502	6.21877	6.50326	6.19276	6.66258	6.76684	6.73866	6.67029	6.21594	7.41613	6.42695	6.33067	6.42746	7.42627
ENSG00000076258	0.255799	7.15318	7.18069	7.13852	7.28252	7.02312	6.9298	7.19481	7.1933	7.14309	7.27776	7.18667	6.97014	7.1375	6.99654	7.05883	6.99002	7.85413	8.63771	8.06996	8.17079	8.5192	8.20835	8.11045	8.27921	7.83501	8.3733	8.32368	8.32569	8.11294	8.42775	8.71585	7.81071	8.72965	8.70791	8.97584	8.02423	7.94572	8.26921	8.01169	8.39443	8.15902	8.29288	8.30775	7.86146	8.42104	8.31931	8.38017	8.193
ENSG00000076321	0.417873	5.75593	5.55662	5.53347	5.59185	5.59764	5.49767	5.57824	5.53012	6.00035	6.0896	5.55266	5.63366	5.6278	5.66795	5.45358	5.69473	5.78535	5.64817	5.7087	5.92465	5.74251	5.56109	5.72783	5.75015	5.81814	5.76029	6.14313	5.55841	5.71888	5.60249	5.60313	5.81605	5.77874	5.69357	5.70028	5.95344	5.85377	5.60564	5.9008	5.86731	5.70193	5.61697	5.3571	5.8944	5.73824	5.79349	5.56909	6.27016
ENSG00000076356	0.72706	5.53286	5.68691	5.42665	5.48657	5.52504	5.34573	5.24412	5.40922	5.35868	5.60349	5.56092	5.49807	5.52695	5.38942	5.34834	5.27665	6.14431	6.07932	6.54831	6.17185	6.11921	6.62709	5.66685	5.93286	6.60909	6.47981	5.97637	7.49543	5.93828	6.74127	6.27951	6.38328	6.15921	6.03262	6.09833	6.7654	6.6585	7.07663	5.94727	6.19085	5.87746	6.24036	5.94619	6.06583	5.95388	5.87838	6.50852	5.63354
ENSG00000076382	0.659773	8.58872	8.47628	8.32731	8.51737	8.65399	8.4138	8.43366	8.49281	6.29372	6.12372	8.72169	8.36269	8.14998	8.38057	8.33015	8.28863	7.68115	6.51142	6.29421	6.19297	7.09479	6.44338	5.9819	6.36365	6.33774	6.30515	6.17155	6.41482	7.61319	6.36932	6.70214	6.33778	6.5558	6.80728	6.60217	6.15428	6.09494	6.73762	6.46761	6.32303	6.10251	6.36246	7.0576	5.85496	6.22927	6.5231	6.39414	8.85554
ENSG00000076554	0.171495	7.03159	6.43601	6.49857	6.55276	6.80211	6.75923	7.02931	6.47812	4.49056	4.51028	6.45847	6.59137	7.2374	7.43623	6.45419	7.4346	5.83267	4.96906	7.45849	5.45268	5.20337	6.90333	7.16293	6.80376	6.17855	7.86317	7.48942	5.44622	5.13106	5.18762	5.11494	7.60361	7.47415	6.70817	5.50599	5.73951	4.8384	6.36926	7.49416	6.66018	7.41569	5.03025	7.23721	6.56822	6.87115	6.04904	7.65169	5.08849
ENSG00000076555	0.198578	6.28909	6.34493	6.43368	6.63589	6.2009	6.62877	6.18416	6.3863	6.27474	6.22888	6.73733	6.61436	6.38677	6.62455	6.74066	6.55633	6.43211	7.33162	6.47853	7.94583	6.63273	6.31765	7.13591	6.60383	6.6963	7.24476	6.63922	6.21139	6.7029	6.29605	7.08674	6.57932	7.27925	6.97941	7.71328	6.67974	6.73507	6.67321	7.13743	6.02971	6.96029	9.6034	6.86465	7.49703	6.67464	6.5379	7.14759	6.43724
ENSG00000076604	0.650986	6.92079	7.05185	7.19159	7.44107	7.40868	7.37817	7.3218	7.46018	6.99919	7.02538	7.56025	7.48191	7.37041	7.51811	7.7076	7.39488	7.09865	7.11468	6.48794	6.73198	6.85165	6.51639	7.8758	6.30975	6.84678	7.51825	6.65076	8.13506	6.79917	8.64075	6.68515	6.46053	7.94908	7.2395	7.36102	7.08426	6.84822	7.21136	6.49912	7.49056	6.67302	6.73074	6.95557	6.99652	6.52102	6.59549	7.32385	7.44165
ENSG00000076650	0.522882	6.53559	6.2586	6.54771	6.41375	6.30695	6.06755	6.17774	6.28966	6.03415	5.55142	5.98664	6.10648	5.85451	6.09155	6.28327	6.02798	6.15082	5.06461	5.19542	5.45139	4.92503	5.41022	5.26597	5.23811	6.19031	5.35743	5.11069	5.75199	5.29358	5.09419	5.20538	5.32982	5.12119	5.09546	4.89449	5.21256	5.54438	5.08466	5.72649	5.3254	5.18086	5.10564	5.16295	5.50132	5.22373	5.22365	5.47055	5.48415
ENSG00000076685	0.708137	7.20439	6.25543	6.7347	6.71365	6.71744	6.77031	6.79332	6.07305	6.8077	6.73205	6.42454	6.24933	6.5244	6.7	6.55472	6.62166	6.40214	5.74054	6.67362	6.21611	6.74576	6.38388	6.07919	7.06659	6.45562	6.46929	7.05544	6.02556	5.8785	5.98678	6.5048	6.82003	5.63048	6.49617	5.81091	6.75171	5.96517	5.70031	7.39167	6.2932	6.68615	7.06918	7.0049	6.82525	7.30801	6.38988	6.3714	6.83976
ENSG00000076716	0.843573	8.66021	8.22276	9.00496	8.67031	8.98756	8.65762	9.16124	8.50953	5.04865	5.38647	8.65601	8.41278	9.10307	9.13834	8.45809	8.21946	6.66648	6.3368	5.98568	6.34142	5.52453	5.90497	5.98466	5.71032	5.70912	6.41297	6.05377	5.87154	5.548	7.31788	6.08381	5.81491	6.00552	7.3372	5.40331	6.40965	5.91652	6.38546	8.00006	6.40564	6.68087	6.99802	6.30664	5.9384	6.14434	5.91713	6.14084	6.12882
ENSG00000076770	0.317725	5.20582	4.98321	4.72983	5.06112	4.94168	4.75829	5.2159	4.7174	4.76547	4.77349	4.935	5.25816	4.88912	4.87808	4.70692	4.63535	4.9137	4.90834	4.86159	4.79407	5.31214	4.83327	4.74676	4.8671	4.84172	4.95482	4.6201	4.861	5.43137	4.97338	5.12524	4.81456	5.04748	4.92771	5.58559	4.77328	5.01281	4.99469	4.9655	8.28667	4.65998	5.15492	4.90229	4.80083	4.85502	5.08587	4.65506	6.73709
ENSG00000076864	0.612611	7.31658	7.42697	7.50498	7.77778	7.29517	7.70289	7.27004	7.52398	7.35273	7.40854	7.54239	7.5826	7.65852	7.51047	7.51512	7.66726	7.54598	9.24447	9.26693	7.74709	8.2225	8.90145	8.07503	9.58309	9.12863	8.0447	8.71679	8.58419	8.62992	8.67221	7.69553	9.24618	8.08457	8.32245	8.33882	7.79589	7.8636	8.85902	8.55348	7.87344	7.751	7.95516	8.55203	7.49734	8.09924	7.79973	9.09579	7.59198
ENSG00000076924	0.5639	5.86811	5.99388	6.21107	6.01432	5.97239	5.91459	5.89148	6.20378	6.10745	6.02243	6.124	5.55897	5.72118	5.84795	6.11446	5.71353	6.09605	6.01056	6.2846	6.22879	6.33163	6.21041	6.49877	6.32272	6.75589	6.02064	6.43386	6.30365	6.24293	6.7479	5.82811	6.37452	6.1297	6.30134	6.32698	5.98636	6.65553	6.51558	6.3312	6.11177	6.17996	6.03011	6.61062	6.39078	6.37741	6.24802	6.10655	6.42802
ENSG00000076928	0.715832	7.43544	7.64565	7.58517	7.18563	7.55989	7.33351	7.28874	7.84193	8.01885	7.92954	7.39403	7.42154	7.17573	7.34872	7.86999	7.45406	7.83302	8.00397	7.72485	7.6973	8.25504	7.64328	7.52344	7.82823	7.54979	7.77307	8.10067	7.42297	7.64255	7.94296	7.71066	7.65766	7.8233	7.72901	7.94967	7.73546	7.69144	8.07567	7.64656	7.46903	7.67205	7.81233	7.64726	7.65354	8.07542	7.97316	8.06854	7.1146
ENSG00000076944	0.668508	6.12609	6.58993	6.93934	6.33204	6.45891	6.41996	6.82613	6.62977	6.16927	6.31122	6.51663	6.65106	6.42915	7.09524	7.28768	6.73339	6.4992	6.63207	6.34039	6.82949	8.15997	6.36691	7.28247	6.10497	6.77371	7.37183	6.24981	6.57028	7.30098	6.88007	6.91402	6.23631	7.56913	6.71875	7.11597	7.60091	6.65158	7.34678	6.98587	7.04835	7.09206	6.71145	7.78341	6.87076	6.23737	7.88616	7.46748	6.80665
ENSG00000076984	0.837943	5.56637	5.55703	5.49707	5.60874	5.4854	5.46051	5.43981	6.02905	5.57247	5.65985	5.46605	5.54032	5.51093	5.5708	5.81639	5.5682	5.73871	5.80884	5.56662	5.67971	5.80788	5.65855	5.47273	5.65619	5.76064	5.57521	5.59778	5.61487	5.6632	5.6065	5.95506	5.6096	5.70187	5.66192	5.74547	5.42656	5.40961	5.84899	5.46957	5.21694	5.34514	5.67877	6.04708	5.59746	5.35182	5.32647	5.65042	5.26084
ENSG00000077044	0.814434	8.00929	8.74611	8.32213	8.25837	8.22356	7.9742	8.32204	8.12061	8.11185	8.01265	8.48445	8.39926	8.4413	8.60165	8.15971	8.57586	8.70191	8.61136	8.90649	8.5851	9.24122	8.54637	8.86226	9.12325	9.9942	8.9056	9.08751	9.73505	8.77658	8.53929	9.08742	9.05809	9.17864	8.33168	8.49703	9.27032	9.01031	8.65815	8.9747	8.49273	9.19562	9.69399	8.7085	8.37669	9.12336	9.06314	10.2894	9.28869
ENSG00000077092	0.352982	5.7767	5.89002	5.89307	5.83089	5.77894	5.78549	5.80815	5.97116	5.93052	6.0093	5.70647	5.82793	5.91263	5.73749	5.87445	5.79722	6.27618	6.65488	6.39947	6.56609	6.65997	6.57169	6.55962	6.8613	6.18441	6.49507	6.44378	6.51517	6.58833	6.71914	6.82843	6.30864	6.5202	6.65553	6.71956	6.26689	6.44246	6.39298	6.46856	6.50278	6.55164	6.65152	6.92452	6.297	6.42003	6.55748	6.39008	6.39038
ENSG00000077147	0.954387	9.89845	9.51548	9.31944	9.38362	9.6606	9.44732	9.587	9.04794	9.91011	9.60021	9.46199	9.4066	9.19948	9.52467	9.43544	9.29717	8.4227	7.75201	7.75619	9.10246	7.42936	7.79421	8.75983	7.40789	7.2238	9.23039	8.18282	7.0071	8.96207	7.59409	7.5958	7.74252	8.82745	8.80282	7.96621	8.70222	8.95108	8.78562	8.57588	9.42083	9.38284	7.53288	8.1743	9.05266	8.09867	7.92918	9.91011	8.15365
ENSG00000077150	0.776494	5.45509	5.52687	5.67097	5.38144	5.44298	5.47147	5.48083	5.54185	5.40581	5.48779	5.35476	5.52581	5.56859	5.4893	5.67887	5.45833	5.61161	5.56552	5.21009	5.64868	5.57884	5.40878	5.36303	5.33792	5.26348	5.37119	5.22932	5.50832	5.50118	5.69225	5.66208	5.366	5.86112	5.56972	6.00009	5.74735	5.22772	5.68584	5.20155	5.25016	5.51524	5.60955	5.70244	5.46568	5.30012	5.31792	5.64299	5.14654
ENSG00000077157	0.6563	6.23622	6.5431	6.48566	6.44804	6.19234	6.24158	6.32676	6.51134	6.39108	6.43857	6.27293	6.38007	6.49221	6.37386	6.53075	6.5391	6.97569	7.17928	7.50844	9.1116	7.15719	7.4553	7.48241	7.54557	7.42158	7.93289	7.47131	7.38546	6.91537	7.06867	8.59884	7.57496	7.4896	7.17526	7.04199	7.16125	7.41681	7.07376	7.1046	7.2016	8.24153	8.12713	7.5597	7.07346	7.44607	7.34328	7.45331	7.21149
ENSG00000077232	0.80506	7.12882	6.1438	6.22677	6.13589	6.73078	6.47947	6.82565	6.1883	7.67671	7.29491	6.51783	6.34632	6.24417	6.28305	6.4206	6.53697	5.50297	5.07526	5.57338	5.86933	5.12482	5.09158	5.80181	5.61557	4.89992	5.79793	5.79591	5.00872	5.63204	5.61763	5.77753	5.67408	5.66156	5.74524	5.66397	6.04569	5.90357	6.2681	6.68635	6.18687	5.9138	5.46717	5.15606	5.57734	5.68363	6.02378	5.88905	7.18508
ENSG00000077235	0.662289	8.26091	8.28314	8.69089	8.14834	8.78265	8.40571	9.00239	8.2432	8.40885	8.05449	8.77092	8.0888	8.17858	8.32144	9.31229	8.19719	7.88557	8.8895	8.70061	8.21435	8.48002	8.69467	8.40043	8.56974	9.15939	8.19759	8.33611	8.82568	8.33764	9.2532	8.5166	8.70418	8.1244	8.35319	8.16606	8.33883	8.57917	8.30328	9.05391	7.98303	8.36525	8.33675	8.14614	8.93527	8.53333	8.11979	8.16241	8.57188
ENSG00000077238	0.789919	7.62352	7.4426	7.64936	7.44938	7.86366	6.78405	7.57756	7.42371	7.77248	7.92916	7.43034	7.27788	7.58404	7.44344	7.5468	7.5646	7.03798	8.44693	7.14262	8.72159	8.81415	6.58382	8.32021	7.42445	7.50779	8.87199	7.19055	7.19407	8.19667	8.33115	7.62441	7.20882	8.56166	8.20694	9.66017	9.4639	7.83257	8.7551	6.89462	8.44923	8.36679	7.03738	7.61897	8.2155	7.79825	9.12798	8.15116	7.85436
ENSG00000077254	0.609586	7.40435	7.20463	7.15416	7.08525	7.37645	7.2319	7.15109	6.92571	7.23012	7.0747	7.39347	7.3704	7.3654	7.34859	6.90199	7.31927	7.51438	7.05817	7.6505	7.35353	6.66262	7.66926	7.72666	7.37226	7.60903	7.41206	7.4642	7.14546	6.99462	7.11357	6.57105	7.7989	7.28807	7.24338	6.79959	7.03646	7.38415	7.0537	7.63195	7.86275	7.27195	6.97003	6.45023	7.57485	7.2204	7.18155	6.90502	7.20176
ENSG00000077264	0.539824	5.81123	5.79578	5.7119	5.98691	5.93433	6.17389	6.08376	6.12847	5.28883	5.12233	5.93703	5.77321	5.75701	5.747	5.70663	5.43026	6.59951	6.16523	6.72522	6.00777	5.81144	6.69014	6.17144	6.3753	5.93982	5.7308	5.97951	6.2954	5.74448	5.65914	6.01166	6.6442	5.71695	5.87599	5.99939	5.64913	5.86896	6.91187	7.06786	5.70202	5.98575	5.91018	6.02346	5.79324	5.79813	5.65872	5.96724	5.9198
ENSG00000077279	0.132434	5.66722	5.46796	5.36424	5.47744	5.7589	5.51352	6.13108	5.81221	4.60826	4.72051	5.36345	5.46825	5.58912	5.85518	5.51374	5.27259	10.431	5.13667	6.10134	4.77673	5.36758	6.05241	6.38085	6.08817	5.13306	4.95486	5.33575	11.2584	5.23731	5.25204	5.05818	5.66455	5.03349	5.02863	5.23677	4.82227	4.80363	4.92319	5.068	5.10553	4.7836	4.88392	5.31741	4.92566	5.52724	5.16303	4.98106	5.02304
ENSG00000077312	0.705818	10.5511	11.2115	11.4099	11.0978	11.2058	11.3129	11.471	11.2275	9.53552	9.71284	10.6382	11.4199	11.1184	11.4649	11.7646	11.3619	9.87389	9.14041	8.21488	9.19049	9.43605	8.30501	9.07975	8.39607	8.81801	8.59639	8.19737	9.11775	9.51562	10.1825	8.29448	8.28728	8.66204	8.56554	7.72941	8.38856	8.73011	8.57778	8.85755	8.72715	8.85994	8.34469	8.80051	8.58801	8.43211	8.85389	8.34698	8.87742
ENSG00000077327	0.928792	5.32225	5.29705	5.37289	5.2627	5.27289	5.28142	5.40071	5.4875	5.35751	5.34018	5.47878	5.42565	5.38094	5.40385	5.35924	5.4604	6.16744	5.85992	5.98524	5.61816	6.23665	6.10549	5.82879	6.67759	5.6306	5.73909	6.68593	5.86717	5.9257	6.25216	6.01617	6.28181	5.7011	6.21919	5.90918	6.23916	6.02073	5.87831	7.04641	6.04828	5.66616	5.73313	6.17887	5.6583	6.40249	6.02801	5.7893	9.54133
ENSG00000077348	0.567802	8.26686	8.68714	8.95801	8.66249	8.52056	8.69807	8.82798	8.75155	7.60872	7.9906	8.7015	8.86441	8.84776	8.87659	9.25884	8.80316	8.32362	7.94003	7.59303	7.81513	7.70024	8.00158	8.04806	7.73979	7.89598	7.93174	7.47726	7.81545	7.9189	8.41713	7.84207	7.28996	7.66011	7.92849	7.81124	7.49906	7.7976	7.77254	7.26814	7.43818	8.09045	7.9721	8.18441	8.02955	7.66244	8.03097	7.78608	7.5541
ENSG00000077380	0.582682	10.1984	9.625	9.84879	9.90088	10.343	9.94987	9.99571	9.4898	11.1932	10.5666	10.3575	9.95557	9.97403	10.0315	9.61599	9.88659	10.5295	8.81901	9.96502	9.55573	7.72294	9.5362	9.17255	10.1928	8.69618	9.03625	11.0804	9.38389	8.94902	8.78965	9.29227	10.2387	8.91372	9.4383	8.22293	9.41334	9.20908	8.8919	9.51845	9.64631	9.71727	8.85836	8.24747	9.33123	10.8136	8.81464	9.12747	9.58693
ENSG00000077454	0.724903	7.50861	7.78566	7.76311	7.69448	7.4415	7.65454	7.55491	7.87481	7.84141	7.74481	7.48764	7.5764	7.74762	7.60079	7.95011	7.65644	7.89998	8.14077	7.9167	7.73117	8.48676	7.85515	7.92594	8.08834	8.1915	8.02274	8.191	7.84305	7.96235	8.20568	8.15551	7.85907	8.10985	7.75188	7.912	7.82214	8.15632	7.93215	8.17005	7.89269	7.77545	8.00614	8.32029	7.95878	7.96862	8.33573	8.01833	8.12354
ENSG00000077463	0.611366	7.4225	7.66232	7.76774	7.66344	7.57423	7.70897	7.76282	7.58838	7.65623	7.6919	7.61564	7.51632	7.41617	7.69801	7.46767	7.46538	8.04861	8.36793	8.29778	7.98129	8.5111	8.22057	8.26615	8.53694	8.31658	8.44882	8.27288	8.46531	8.31765	8.68808	7.8827	8.06583	8.36428	8.21916	8.28593	8.13368	8.21758	8.37151	8.36588	8.04145	8.04584	7.9639	7.79105	8.21142	8.49142	8.06364	8.15299	7.85565
ENSG00000077514	0.743616	7.85693	7.71264	7.76613	8.05907	8.08311	8.19754	7.79828	7.71587	7.28267	6.54239	8.60457	8.33694	7.73005	8.12902	8.77026	7.96735	7.90903	6.5282	6.58901	6.7866	6.76337	6.69997	6.77119	6.93554	6.61827	7.1317	6.63324	6.57325	7.37957	6.66999	6.54635	6.45313	6.76738	6.7492	6.47574	6.80897	6.76786	7.01223	6.56662	6.83788	7.06124	6.69214	6.40848	6.74222	6.82696	6.56479	6.64829	7.6095
ENSG00000077549	0.833518	8.2747	8.6813	8.6732	8.82991	8.59469	8.71604	8.80145	8.68687	9.33641	9.4436	8.55519	8.76168	8.9014	8.89929	8.98529	8.90416	7.88856	8.72216	8.76608	9.01066	9.09099	8.56988	8.69196	7.96195	8.85348	9.01864	8.54085	8.78081	7.99739	8.86026	8.62306	8.67096	8.88189	8.58871	8.06202	8.83775	9.32225	8.2444	8.13481	8.88547	8.89781	9.10217	8.18414	8.70787	8.63261	9.35374	8.50913	8.70442
ENSG00000077585	1.00678	6.19756	5.71917	5.59871	6.15031	5.40214	5.64393	5.50594	5.39402	7.54937	7.5364	6.15192	6.17616	6.5844	6.4073	5.93725	6.29597	5.99568	5.63591	8.08605	6.76289	5.67933	7.48933	6.28622	8.05755	7.63458	6.32962	8.18384	7.23641	5.62163	5.74478	7.52209	7.66584	5.97658	7.18795	6.03156	7.36261	6.01409	6.21347	5.88527	7.48793	6.22273	5.17254	5.39583	7.25225	8.601	8.11627	5.91245	5.4692
ENSG00000077721	0.813021	9.01579	8.5324	8.7578	8.6203	8.91439	8.76199	8.9762	8.64668	9.33307	9.27942	9.02159	8.7397	9.79767	9.73282	8.35128	8.52338	8.23518	7.7635	7.98235	7.7928	7.79727	7.70299	7.91768	7.68587	7.43864	8.44238	8.0124	8.12715	7.88075	7.78373	8.52959	7.78397	8.04536	8.22271	7.20211	8.38126	7.74107	7.57557	8.13273	9.08432	8.35537	8.65655	7.60297	8.22094	8.17769	8.00334	7.95388	7.81589
ENSG00000077782	0.742484	7.26963	7.58252	7.44106	7.5746	7.3118	7.39884	7.44263	7.42962	7.09271	7.05712	7.26385	7.62399	7.47361	7.61216	7.91257	7.47139	6.85124	7.12681	7.28571	7.67547	7.28597	7.00885	7.94488	7.07713	8.15284	7.30976	7.18825	7.11346	7.13176	7.68668	7.54239	7.27611	7.1473	7.03982	7.01466	7.23302	8.01595	7.44773	7.3204	7.38177	7.36901	7.07162	7.23445	7.54076	7.2567	6.98874	7.03011	7.18873
ENSG00000077809	0.813655	7.68331	7.75695	7.53489	7.76545	7.67875	7.78703	7.55452	7.66845	7.3239	7.05834	7.59413	7.71194	7.59564	7.9233	7.75849	7.77787	7.28174	7.0014	7.45544	7.11136	6.87173	7.01932	8.23056	7.26828	7.1014	6.88873	7.74822	8.13788	6.59589	7.41622	6.26332	7.49934	6.5394	7.211	6.27208	6.86255	7.99504	7.01693	7.49685	7.13844	7.00809	7.36258	6.48416	7.57661	7.34671	6.86915	6.91983	6.79526
ENSG00000077942	0.800728	7.93797	8.208	7.76946	7.68135	7.95902	7.52993	7.82371	7.33043	8.52018	8.57117	7.91472	7.93205	7.60766	7.46581	7.81919	7.4711	8.02521	8.72277	7.25082	9.61986	7.32456	7.35767	8.47146	7.21464	7.24574	8.55296	7.498	7.74502	7.42794	9.45915	8.04538	7.38447	7.99184	7.98667	7.30471	9.60919	8.6211	7.82223	7.17354	9.18912	8.978	8.17405	7.84748	8.91187	7.74676	7.09726	8.50867	7.50148
ENSG00000077943	0.68433	6.26197	6.20447	6.05422	6.20994	6.20594	5.9778	6.0237	6.12595	6.50727	6.63958	5.73352	6.24583	6.11829	5.82051	6.18661	6.23476	6.60944	7.84284	6.75588	7.71475	6.78735	6.74815	6.51019	6.68779	6.25821	6.73818	6.70324	6.5383	6.57194	7.70499	7.0017	7.00905	7.18557	7.04458	6.49293	6.89331	6.92083	6.76047	7.00689	6.28437	8.07585	7.38489	7.03302	7.17787	6.5002	7.67323	6.71214	6.70198
ENSG00000078018	0.437197	6.07687	5.98358	5.95529	6.00832	6.26801	6.03085	5.62444	5.74769	5.71567	5.55683	6.25037	6.06119	5.45392	5.55626	5.82549	5.48569	7.01348	6.08331	7.72834	5.90202	6.47875	6.63697	5.97079	6.83431	6.46679	5.77795	6.55721	7.85777	6.23489	6.24198	6.17497	7.18455	5.93295	6.33128	6.52566	6.09396	5.98188	6.68174	6.9087	6.02667	5.97388	5.8537	6.59361	6.52701	6.20705	6.09374	5.91388	6.56876
ENSG00000078043	0.901531	5.78091	5.67756	5.57825	5.72282	5.66745	5.75765	5.63264	5.85024	5.44617	5.54118	5.856	5.78906	5.83567	5.89241	5.64115	5.78119	5.21006	5.28142	5.27489	5.3309	5.21636	5.50706	5.22976	5.29438	5.2606	5.39837	5.0934	5.33678	5.26443	5.27723	5.38117	5.38688	5.12535	5.49969	5.29147	5.20546	5.19269	5.36461	5.22833	5.16517	5.21566	5.57302	5.39999	5.05831	5.11591	5.38066	5.2836	6.68897
ENSG00000078053	0.636994	6.98812	7.15705	7.07678	7.23358	7.0299	7.0631	7.0895	7.38258	6.38253	6.50391	7.67713	6.90917	6.44777	6.45992	6.94206	6.77902	8.05758	6.82705	9.73483	7.00139	6.565	9.68153	6.37045	7.8368	9.86684	6.76925	7.18594	8.69177	6.29304	7.11152	6.82351	10.0426	6.35206	6.02844	6.30697	5.95778	6.4772	6.14196	9.15554	6.28673	6.47151	7.01694	6.25503	6.16689	8.04222	6.6706	5.97307	6.72761
ENSG00000078061	0.635799	7.74012	8.11982	7.77091	7.968	8.27252	8.17548	8.15582	8.07424	7.78526	8.31878	8.13834	7.83952	8.26331	8.82463	8.36732	9.00868	7.57997	8.18779	7.22647	8.06932	8.19622	7.23973	8.08493	7.2259	7.57866	8.04614	7.59614	7.20414	8.3933	8.48914	7.78746	7.12134	8.03901	7.87379	8.26261	7.7641	8.02448	8.25337	7.72965	7.70784	8.47161	8.77559	8.21019	7.96984	7.62791	8.14028	8.51376	7.25077
ENSG00000078070	0.52858	8.428	8.53019	8.9689	8.92678	8.69791	9.0316	9.03353	8.55004	8.5244	8.16879	8.76376	8.98098	8.03109	8.44959	8.17932	7.95459	8.61668	8.09077	8.24291	8.46423	7.06358	7.94133	8.23839	8.45084	7.77566	8.16401	8.36602	7.55538	8.12292	6.98816	8.29406	8.34224	7.7361	8.29735	8.53456	8.25084	7.27843	7.8454	8.79662	6.73944	7.72896	7.51878	7.77571	8.21288	7.97568	7.43615	8.99259	7.63069
ENSG00000078098	0.261998	7.76979	6.836	6.07721	5.69353	6.37199	5.91908	6.59156	5.80899	10.8343	10.9749	6.35474	6.91628	5.98221	6.01641	6.34961	5.67125	6.45977	6.08991	5.94085	6.044	6.2883	5.96707	7.25524	5.79885	5.63597	5.84563	5.9057	5.86432	5.94895	6.30518	6.24356	5.95699	5.93882	6.11203	5.93937	6.4467	6.10702	6.06777	5.74564	7.01693	5.99176	6.72868	5.85629	6.39135	5.98835	5.89395	5.63245	5.93955
ENSG00000078114	0.141211	6.07624	6.00131	6.0384	6.61226	6.0358	6.08922	5.8421	5.79896	5.32703	5.3683	6.26236	6.15847	6.05997	5.94868	5.94229	5.92914	6.22326	5.91421	7.23505	6.03469	5.80156	6.81694	7.09771	7.28446	7.12944	6.08965	7.30672	6.16217	5.70957	5.76523	8.76424	7.21458	5.80013	6.45308	5.86218	6.9706	5.78103	5.93626	7.15557	6.68063	6.50487	5.82705	6.4583	6.84483	7.46807	5.70599	6.26284	5.72087
ENSG00000078142	0.6322	7.55319	7.22944	7.3856	7.27132	7.27135	7.37687	7.54585	7.42223	7.55236	7.68871	7.56472	7.34772	7.26096	7.20698	7.44945	7.48844	7.64434	7.26363	7.02704	7.03716	6.9066	7.15325	6.92015	7.4031	6.79602	7.01758	7.28892	6.87022	7.20608	6.95796	7.42238	7.09959	7.0503	7.10761	7.26524	6.957	6.7619	7.02647	7.5264	7.22282	7.15885	7.27539	7.25937	7.24451	7.30605	7.1319	6.95598	7.43605
ENSG00000078237	0.816407	8.27631	7.60727	7.50405	8.06811	7.73297	8.0601	7.69565	7.13199	9.15629	8.55057	7.9736	7.61941	8.15288	8.10424	7.11497	7.7465	7.07037	5.40252	5.77599	5.5272	5.50882	5.94473	5.18429	5.54952	5.41319	5.75099	5.83291	5.12957	5.11444	5.38251	5.48285	5.97037	5.83522	5.77795	5.45636	7.30074	5.79195	5.12604	6.53126	6.6594	6.0731	6.03582	5.18433	5.22651	5.98496	6.23872	5.41613	6.1473
ENSG00000078246	0.731577	7.11378	7.52476	7.42449	7.82063	7.41026	7.34847	7.40652	7.69892	8.01231	7.94418	7.24911	7.36762	7.53501	7.65435	7.6229	7.23664	7.39259	7.22493	6.2869	6.97039	6.13763	6.2366	7.11589	7.1142	7.35489	6.63911	7.18028	6.71874	6.49099	7.40514	6.345	6.68552	6.36257	6.79906	6.20268	6.58713	7.44114	6.46397	7.20782	6.66219	7.03214	6.58328	6.79384	7.26703	6.5393	6.27346	6.57192	6.79699
ENSG00000078269	0.826261	6.43773	6.41271	6.43732	6.31087	6.3164	6.35033	6.40084	6.42899	6.82427	6.93434	6.29431	6.22883	6.43025	6.37221	6.36155	6.21147	6.2457	6.58562	7.41903	6.80672	6.64073	7.02402	6.96458	7.39098	6.79699	6.92161	8.02895	6.59852	6.46246	6.50928	6.578	7.52313	6.41159	6.2914	6.55684	6.37638	6.67358	6.70821	6.56896	6.32312	6.54209	6.37514	6.80025	6.45281	7.95077	6.55253	6.53676	6.13042
ENSG00000078295	0.777926	5.25338	5.69321	5.55152	5.50849	5.21192	5.6042	5.43567	5.55913	5.27151	5.52005	5.42424	5.38795	5.55318	5.28665	5.33915	5.51528	5.52958	5.92283	7.00457	5.98279	6.24075	6.90832	5.89022	6.38537	6.06634	6.08146	6.25402	6.50015	5.938	5.83031	6.07268	7.05344	6.10977	6.16317	6.11494	5.76821	6.05762	6.17105	6.14884	5.93228	5.93893	6.73765	6.09972	5.9428	6.32574	6.19463	6.0007	6.05608
ENSG00000078304	0.486077	7.84052	7.20597	7.52861	7.44004	7.6152	7.36166	7.39626	6.79079	7.64871	7.55147	7.77394	7.57074	7.41761	7.57435	7.20085	7.55644	7.33776	6.38067	7.88542	7.44137	6.31766	7.12118	7.40268	7.3779	6.29772	7.06236	7.04827	7.07091	6.77976	6.31064	7.32488	7.67107	6.76592	6.73603	6.19266	7.21554	7.12555	6.83777	7.30446	6.83527	6.8246	7.18642	6.22601	7.09975	7.18973	7.11219	6.80161	7.55281
ENSG00000078319	0.842413	8.69193	9.03778	9.59862	9.2762	9.11596	9.30907	9.29552	9.02144	8.97872	9.44664	9.19781	9.41473	8.85564	8.88891	8.88078	9.29324	8.95759	9.2656	8.81585	8.91185	9.24928	8.96183	8.91858	8.83099	8.88701	8.77788	8.77038	9.40371	8.65648	9.23172	8.86952	8.94438	9.2526	9.05823	8.91945	8.56996	8.45639	8.95379	9.12463	8.34911	8.65544	8.38985	9.05232	8.83124	8.9025	9.10724	9.07044	9.58392
ENSG00000078369	0.858892	9.60514	9.72481	9.58163	9.82427	9.93624	9.70976	9.81923	9.77007	10.1238	10.1569	9.88509	9.91852	9.65697	10.0019	10.1331	9.85417	9.53329	9.15441	10.8144	9.72197	9.56665	10.1879	9.57221	10.4491	9.60332	9.34441	10.2805	11.2849	8.71364	9.19929	8.60114	11.0027	9.70632	9.4286	8.40987	9.39373	9.90053	9.01057	9.8775	9.3857	9.33449	7.95327	9.15916	9.52275	10.006	9.70406	8.88408	9.38058
ENSG00000078403	0.773099	5.7392	5.6497	5.67152	5.62311	5.56977	5.70278	5.65538	5.69903	5.48479	5.49324	5.67261	5.81709	5.91678	5.73632	5.58037	5.89171	5.75414	5.9438	5.75947	5.84736	6.25904	5.68993	6.02827	5.73222	5.66484	5.75288	5.83193	5.96054	6.13674	5.9667	5.73758	5.75838	5.81225	5.92404	6.04517	5.70682	6.03328	6.01894	5.73792	5.95474	5.65828	5.62379	6.01366	6.14139	5.70361	5.9552	5.80723	6.84808
ENSG00000078487	0.778443	6.65833	6.86235	6.79662	6.94148	6.63136	6.79216	6.90883	7.02883	6.68281	6.86631	6.9128	6.71009	6.86332	6.73619	6.75751	6.81818	7.07993	7.65915	7.23042	7.47823	7.45795	7.57137	7.59111	7.55298	7.97137	7.42755	7.71657	7.51409	7.10109	7.90764	7.6389	7.43673	7.44516	7.57321	7.67526	7.30567	7.54223	7.34397	7.30449	7.30071	7.42831	7.4643	7.66036	7.42274	7.65037	7.45111	7.51891	8.62841
ENSG00000078549	0.711099	5.59713	5.74279	5.79135	5.83636	5.58474	5.74517	5.74635	5.84256	5.65668	5.88472	5.68882	5.67903	5.8782	5.6704	5.7846	5.76596	5.8143	5.89653	6.22831	6.08391	6.24817	6.16224	6.32685	6.00745	6.01116	6.29808	6.06346	6.5328	6.04407	6.09984	6.20432	6.0788	6.04287	5.89538	6.31135	6.02885	6.03471	6.14595	5.92845	5.85393	5.91946	6.04496	6.1556	5.98647	5.89322	5.9343	5.86656	5.88121
ENSG00000078618	0.856366	9.93107	10.0948	9.85263	9.95834	9.96251	9.94831	9.91267	10.0504	10.169	10.3923	9.76779	9.99518	10.0511	10.0505	9.80762	10.0634	9.54694	8.1417	8.80542	8.71186	8.08775	8.52951	8.27303	8.76119	8.54802	8.35934	8.40028	8.36408	9.29781	7.5138	9.20597	8.69452	8.40653	8.35797	8.61769	8.70988	8.76461	8.27249	9.46471	8.46712	9.30394	10.7261	8.11552	9.1632	8.76612	8.56078	8.52207	10.0797
ENSG00000078668	0.806569	9.24336	8.90919	8.98008	8.84636	9.02284	8.96955	8.88149	8.8238	8.71489	8.7686	8.9065	8.91259	8.96757	8.85824	8.8337	8.93819	8.98254	8.26235	8.83262	8.5351	8.55893	8.82349	8.17245	8.66654	8.61	8.58426	8.45721	8.92015	8.76852	7.99519	9.35444	8.94255	8.47641	8.60911	8.183	8.28721	8.35869	8.04751	8.59461	8.53757	8.51226	9.49539	8.04138	8.31882	8.56731	8.09871	8.28495	9.20616
ENSG00000078699	0.186339	6.21427	6.12237	6.15684	6.34835	6.06687	6.01175	6.09904	6.27768	6.03537	6.20059	6.17315	6.21724	6.49495	6.29944	6.21611	6.41244	6.81919	6.93625	6.84884	6.73082	6.75467	6.8316	6.83847	6.68004	6.81219	6.95598	6.86506	7.3645	6.64578	7.07743	6.74075	6.83454	7.06026	6.65496	6.84019	6.59315	6.73029	6.55949	6.55717	6.49056	6.53792	6.95222	6.98997	6.82584	6.81448	6.53964	6.82246	6.83313
ENSG00000078795	0.713314	4.18857	4.28278	4.38878	4.33343	4.25646	4.39978	4.35185	4.21867	4.29234	4.43867	4.29062	4.33673	4.11215	4.24213	4.38676	4.32961	4.17201	4.4939	4.27471	4.49264	4.52021	4.33917	4.54585	4.38688	4.33622	4.41333	4.33835	4.39675	4.42178	4.59344	4.40691	4.31721	4.44556	4.32531	4.36605	4.33731	4.40761	4.43118	4.39752	4.21277	4.35851	4.30551	4.55498	4.32315	4.28658	4.23653	4.59431	4.42637
ENSG00000078808	1.07385	7.57338	7.67	7.68136	7.26354	8.02466	7.6544	7.99583	7.19117	9.23881	9.02504	8.13707	7.7492	7.48667	7.7547	7.81514	7.42448	7.2107	8.32363	8.3879	8.77543	8.15192	7.75396	8.59435	7.86452	8.51813	8.69717	8.58544	7.61872	7.88112	8.76082	7.72611	8.59782	8.83936	8.69988	8.45198	7.91457	8.96199	8.15575	9.18895	8.67419	8.38377	7.69592	8.68327	8.3717	8.38958	8.26716	8.14701	7.3421
ENSG00000078814	0.207504	4.97662	4.81189	4.93927	4.94774	4.71189	4.87638	4.91178	4.95615	5.08823	4.92252	4.96408	5.05421	4.85955	4.90757	5.05463	4.95777	4.90731	5.16624	4.90799	4.95922	5.57972	5.3256	5.03351	5.20835	5.52493	5.42296	5.51671	5.29443	5.13708	5.203	6.75018	5.29118	5.01801	5.25438	5.36154	5.03925	5.21135	5.18773	5.00738	5.08565	5.10141	5.11615	5.81196	5.07026	5.2489	5.19041	5.0539	5.20514
ENSG00000078900	0.846371	5.35681	5.28616	5.24446	5.43422	5.2849	5.30502	5.19708	5.47911	5.25868	5.387	5.13563	5.37586	5.22719	5.24058	5.7725	5.32313	5.50905	5.76735	5.52933	5.52933	5.96417	5.56119	5.42915	5.48724	5.90758	5.49047	5.57113	5.66505	5.6773	5.40306	5.84851	5.74491	5.46466	5.74553	5.80642	5.24578	5.69796	5.67232	5.35471	5.28508	5.51837	5.57769	6.48724	5.50519	5.19005	5.37664	5.49966	5.29024
ENSG00000078902	0.930396	6.23617	6.28992	6.62608	6.56501	6.436	6.85816	6.44304	6.53275	6.84124	7.15654	6.7232	6.54239	6.45124	6.65263	6.66487	6.89247	6.90069	7.98927	8.28104	7.60678	8.2878	8.64927	7.52189	7.27691	7.99933	7.81128	7.55965	8.24011	7.74727	8.23668	7.82703	8.2162	7.79027	8.00836	8.30212	7.38284	7.73545	7.8376	7.67838	7.41246	7.79989	8.40006	8.01322	8.05231	7.6413	7.88707	7.3107	8.64493
ENSG00000078967	0.822753	7.17352	7.40999	7.69725	7.43389	7.43581	7.41424	7.65938	7.40972	7.89288	7.93537	7.40964	7.44328	7.44328	7.207	7.40548	7.39476	7.47744	8.33551	7.90625	8.19917	7.93851	8.09485	7.83971	7.95423	8.10737	7.95509	7.93514	7.94698	7.90409	8.16075	8.27761	7.93338	7.61065	7.96745	8.05583	7.86935	8.12373	8.12968	7.81453	7.92022	8.0814	8.96934	8.38583	7.68855	8.04403	8.03762	8.17078	7.47984
ENSG00000079101	0.540055	5.10558	5.36494	5.19378	5.32321	5.12526	5.18217	4.99581	5.15418	5.26525	5.2084	5.04361	5.10173	5.1368	5.24274	5.39802	5.28684	5.47308	5.40847	5.53286	5.17038	5.42023	5.59534	5.54027	5.4045	5.43703	5.20807	5.59946	5.29465	5.51119	5.3801	5.40784	5.54468	5.44528	5.32022	5.31222	5.24299	5.68424	5.31753	5.46839	5.22379	5.35207	5.31416	5.65112	5.17225	5.49282	5.37945	5.40877	5.36924
ENSG00000079102	0.343238	6.50579	6.47683	6.46623	6.35904	6.43994	6.64562	6.60303	6.31068	7.33137	7.19148	6.39277	6.67896	6.38764	6.23546	6.42337	6.30452	7.07093	5.83889	6.28229	6.26674	5.81787	6.3649	6.52778	6.22371	6.72672	5.88432	5.73057	7.03807	6.03165	6.30575	6.46845	6.21476	5.89744	5.77455	5.8769	5.77507	6.08131	5.77928	6.00606	5.73882	5.89577	5.86934	5.83921	5.89335	5.73444	5.8338	5.65784	6.01861
ENSG00000079112	0.151114	6.23861	6.52349	6.58667	6.50464	5.97743	6.4663	6.34469	6.33244	6.17181	6.48449	6.0582	6.56729	6.58336	6.51141	6.19262	6.39282	7.13557	6.9049	6.86562	6.86816	7.08173	6.79252	7.00914	7.46664	6.71335	10.6937	6.88008	7.12709	6.68336	6.85824	6.85899	6.83837	10.9212	6.75704	7.24032	6.76409	6.7813	6.85091	6.80075	6.68613	6.68892	6.95659	7.15276	6.88374	7.05655	7.11946	6.58081	6.78945
ENSG00000079246	0.123078	10.9503	10.6725	10.8566	11.0962	11.2074	11.3332	10.9698	11.097	10.2116	10.1487	11.1524	11.2702	10.9729	11.0989	10.9247	11.0768	10.8004	8.19386	8.67604	9.35171	9.22473	8.12728	9.56991	8.57336	7.80977	8.87534	8.93329	9.50622	9.53023	8.77881	8.72053	8.85364	8.84738	9.40339	9.15561	9.48273	9.61478	9.07155	9.32665	9.27733	9.60377	9.0356	7.59402	9.27846	8.93355	9.48633	9.06439	9.31895
ENSG00000079257	0.38825	6.90516	6.43346	6.61461	6.91656	6.84133	6.72902	6.70291	6.30206	8.77973	9.33592	7.02442	7.16855	6.30666	6.62371	6.57328	6.48452	6.00154	6.15463	6.22779	8.16899	7.03548	5.47233	8.35368	5.77248	5.73834	8.05599	5.6544	5.94893	8.8734	8.71722	5.85049	6.21383	7.53945	7.19737	5.87639	8.71608	7.90937	7.19058	7.3205	7.85402	9.64596	6.20197	6.3334	6.59873	5.76844	5.7445	6.56603	5.94897
ENSG00000079263	0.159274	4.67905	4.85061	4.95673	4.43127	5.0057	4.7443	4.72348	5.1958	4.60701	4.5902	4.93582	4.77504	4.54032	4.5606	4.76641	4.75343	4.87009	5.11448	5.13732	4.87587	5.56701	4.96663	4.93723	5.21078	5.45332	5.7453	5.04243	5.07383	4.97434	4.96493	5.27707	5.17675	5.25857	5.22702	5.3094	5.16811	5.0468	5.68487	4.92146	4.81221	4.99435	5.06059	5.57866	4.95047	5.16199	5.83541	5.02143	4.98146
ENSG00000079277	0.632724	7.73703	7.91757	7.8826	7.62098	7.80254	7.54505	7.98266	7.81163	8.32976	8.66023	7.73499	7.90916	7.88245	7.74952	7.5307	7.92206	8.10881	8.90775	9.09679	9.08544	9.1138	8.55673	8.99644	8.69548	8.70677	9.04622	8.70771	8.27932	8.97879	8.54568	8.9908	8.9424	9.19628	8.52565	8.94338	9.75824	8.80191	9.44492	8.98018	8.83614	8.59562	8.86901	8.4983	8.91708	9.01337	9.76626	9.08856	8.72845
ENSG00000079308	0.223078	6.09553	6.36758	6.21761	6.11387	6.05328	6.10869	6.11768	6.15308	7.62953	7.63845	6.23322	6.18347	6.23387	6.12136	6.37977	6.0999	6.81282	8.64021	7.22869	9.36984	8.58489	7.17127	7.61434	7.50283	7.14308	8.5764	7.68078	6.74983	8.34385	8.38352	9.04447	7.28781	7.88748	8.18564	7.11115	8.6202	8.59865	7.88656	7.08122	7.43167	8.89519	8.7347	8.00891	7.82298	8.18384	7.709	7.66469	7.80228
ENSG00000079332	0.758667	8.41637	7.95756	8.11394	8.00312	8.12238	7.97598	8.08262	8.01999	8.88191	8.61099	8.03837	8.01351	7.90051	8.13176	7.8884	7.78057	7.72171	7.5551	6.7755	7.80883	7.18568	6.72942	7.7229	6.70892	6.65781	6.97771	6.84938	7.29761	7.76423	7.17205	6.96373	6.7456	7.05634	7.39536	7.1368	7.54278	7.72851	7.73495	7.2932	8.17057	7.41113	7.34758	7.30729	7.13045	6.9859	7.23919	7.08748	7.1673
[truncated: 7,066 more rows]
[truncated: 394 more columns]
